# Supplementary material for: N-(1-Oxy-2-picolyl)oxalamic acids as a new type of O,O-ligands for the Cu-catalyzed N-arylation of azoles with aryl halides in water or organic solvent
Source: Royal Society of Chemistry journal article supplement (doi:10.1039/c5ob00045a), 2015-01-01

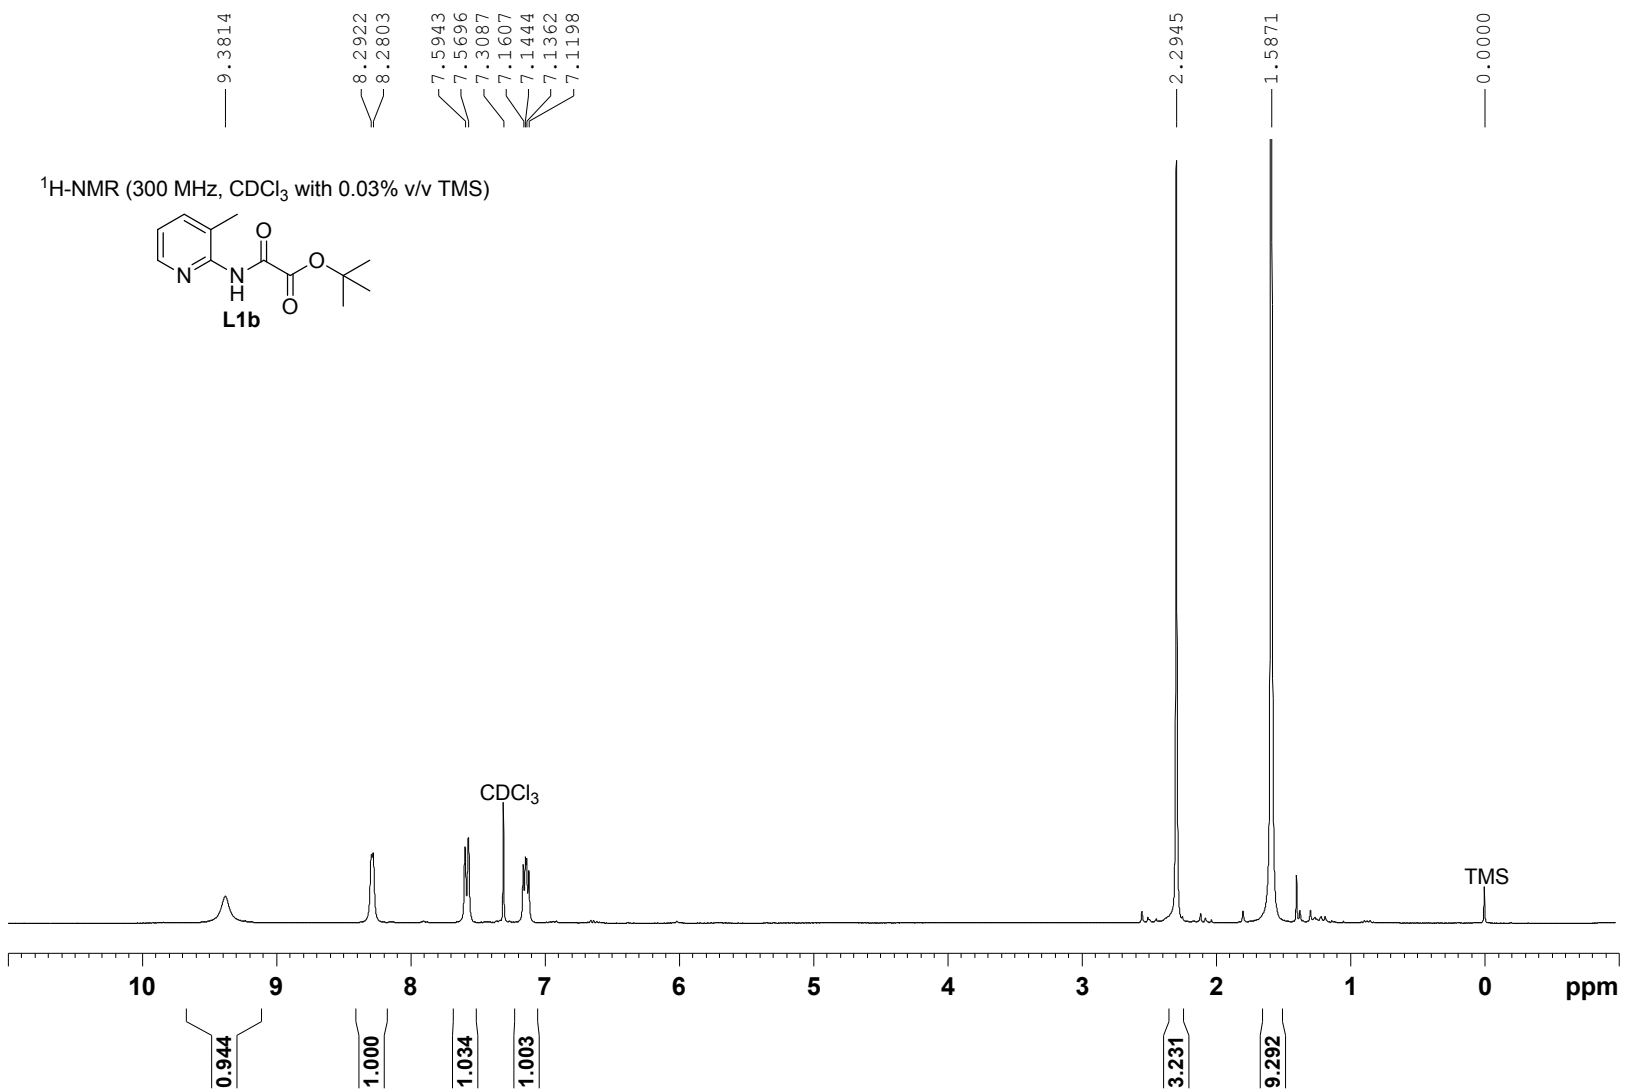

<sup>13</sup>C-NMR (300 MHz, CDCl<sub>3</sub> with 0.03% v/v TMS)

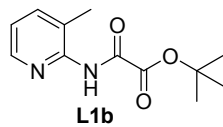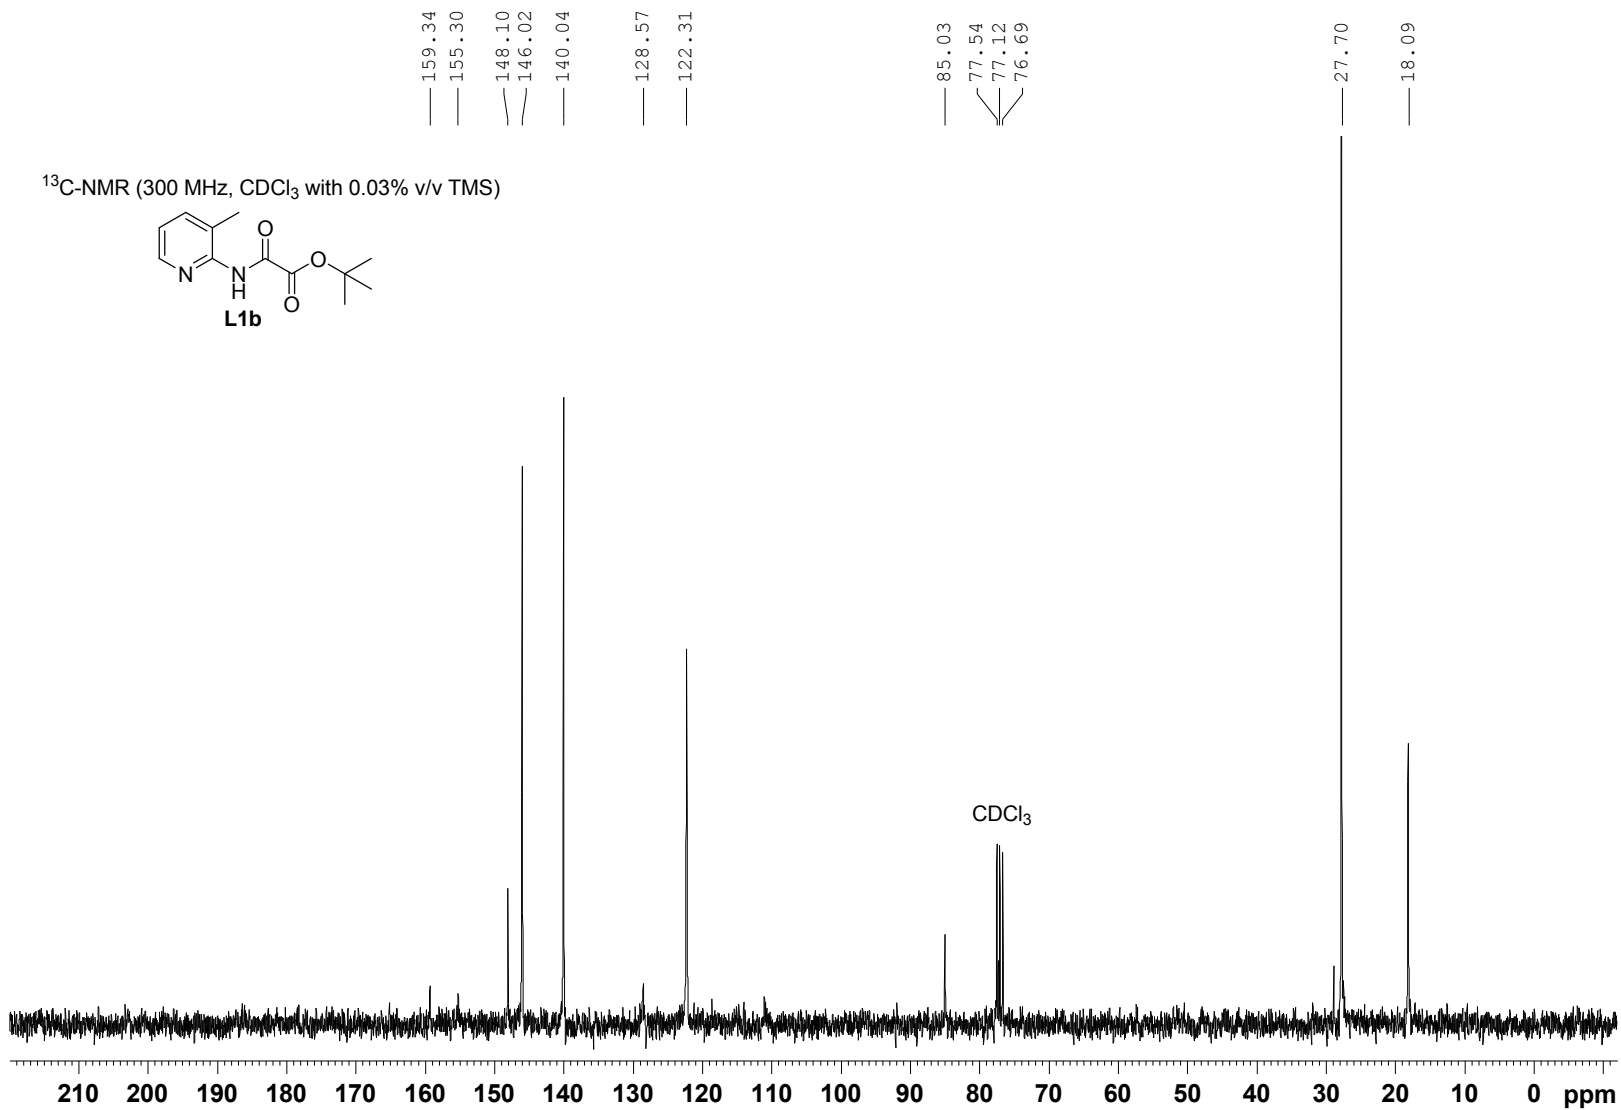

<sup>1</sup>H-NMR (300 MHz, CDCl<sub>3</sub> with 0.03% v/v TMS)

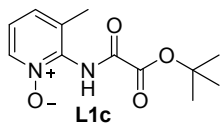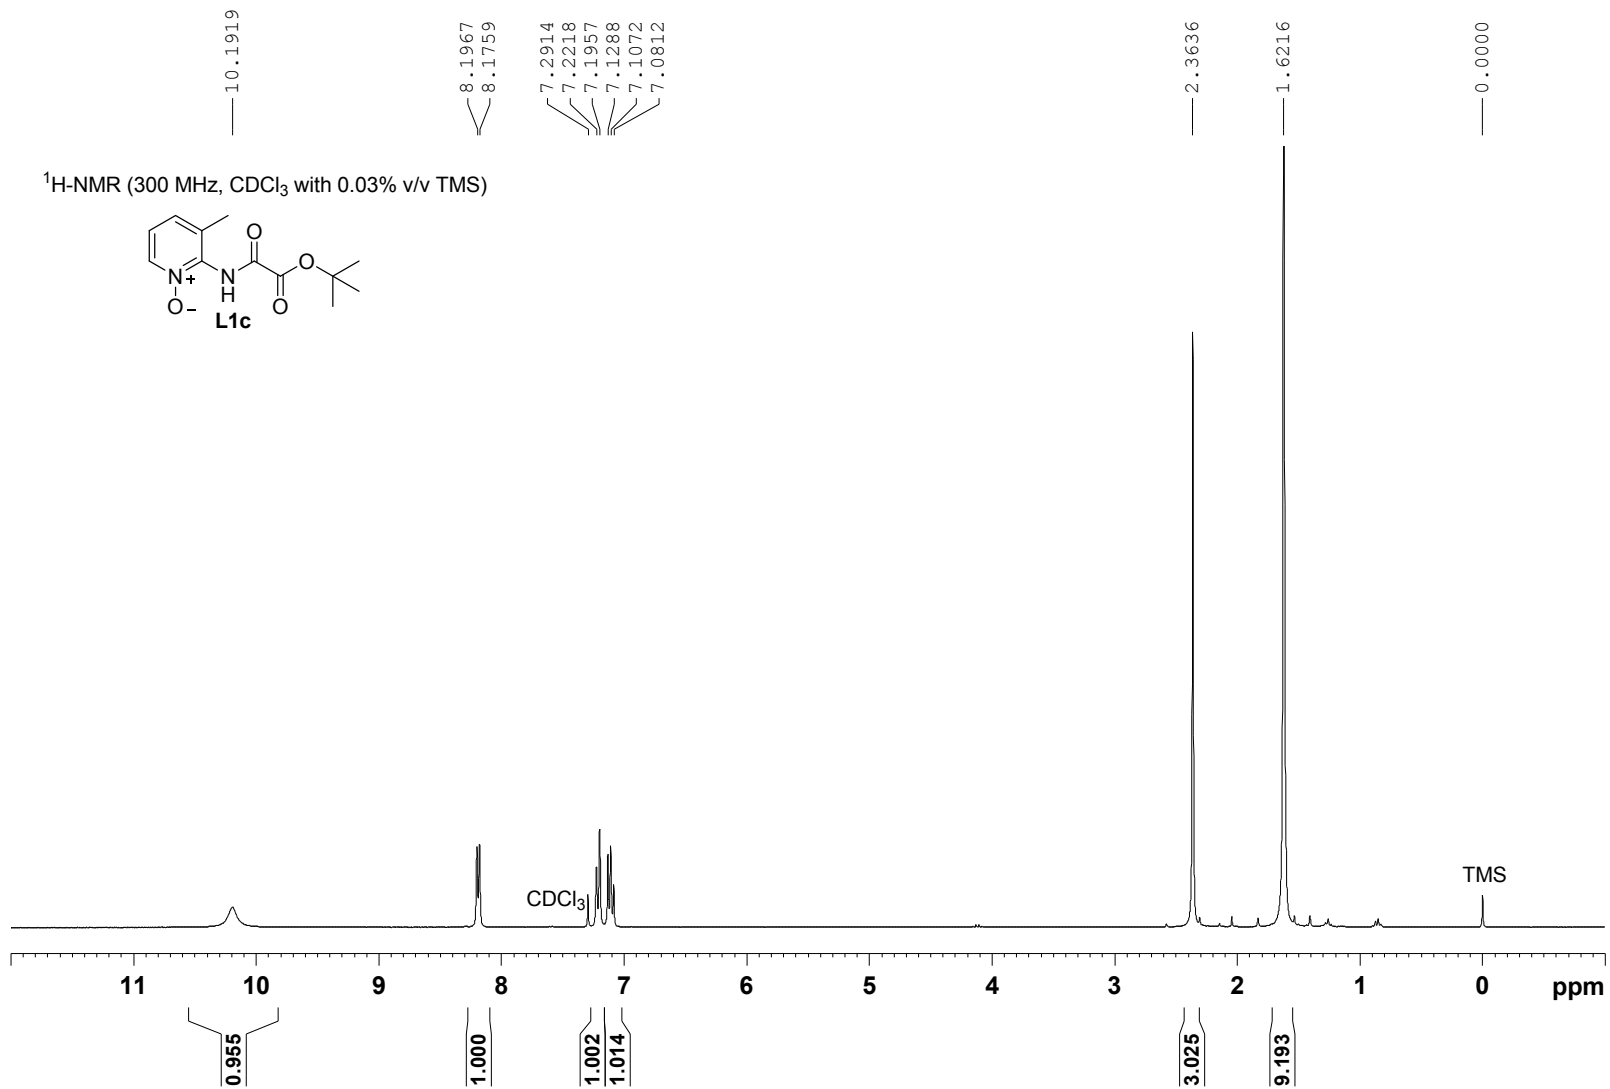

<sup>13</sup>C-NMR (300 MHz, CDCl<sub>3</sub> with 0.03% v/v TMS)

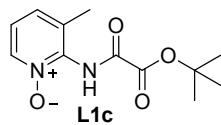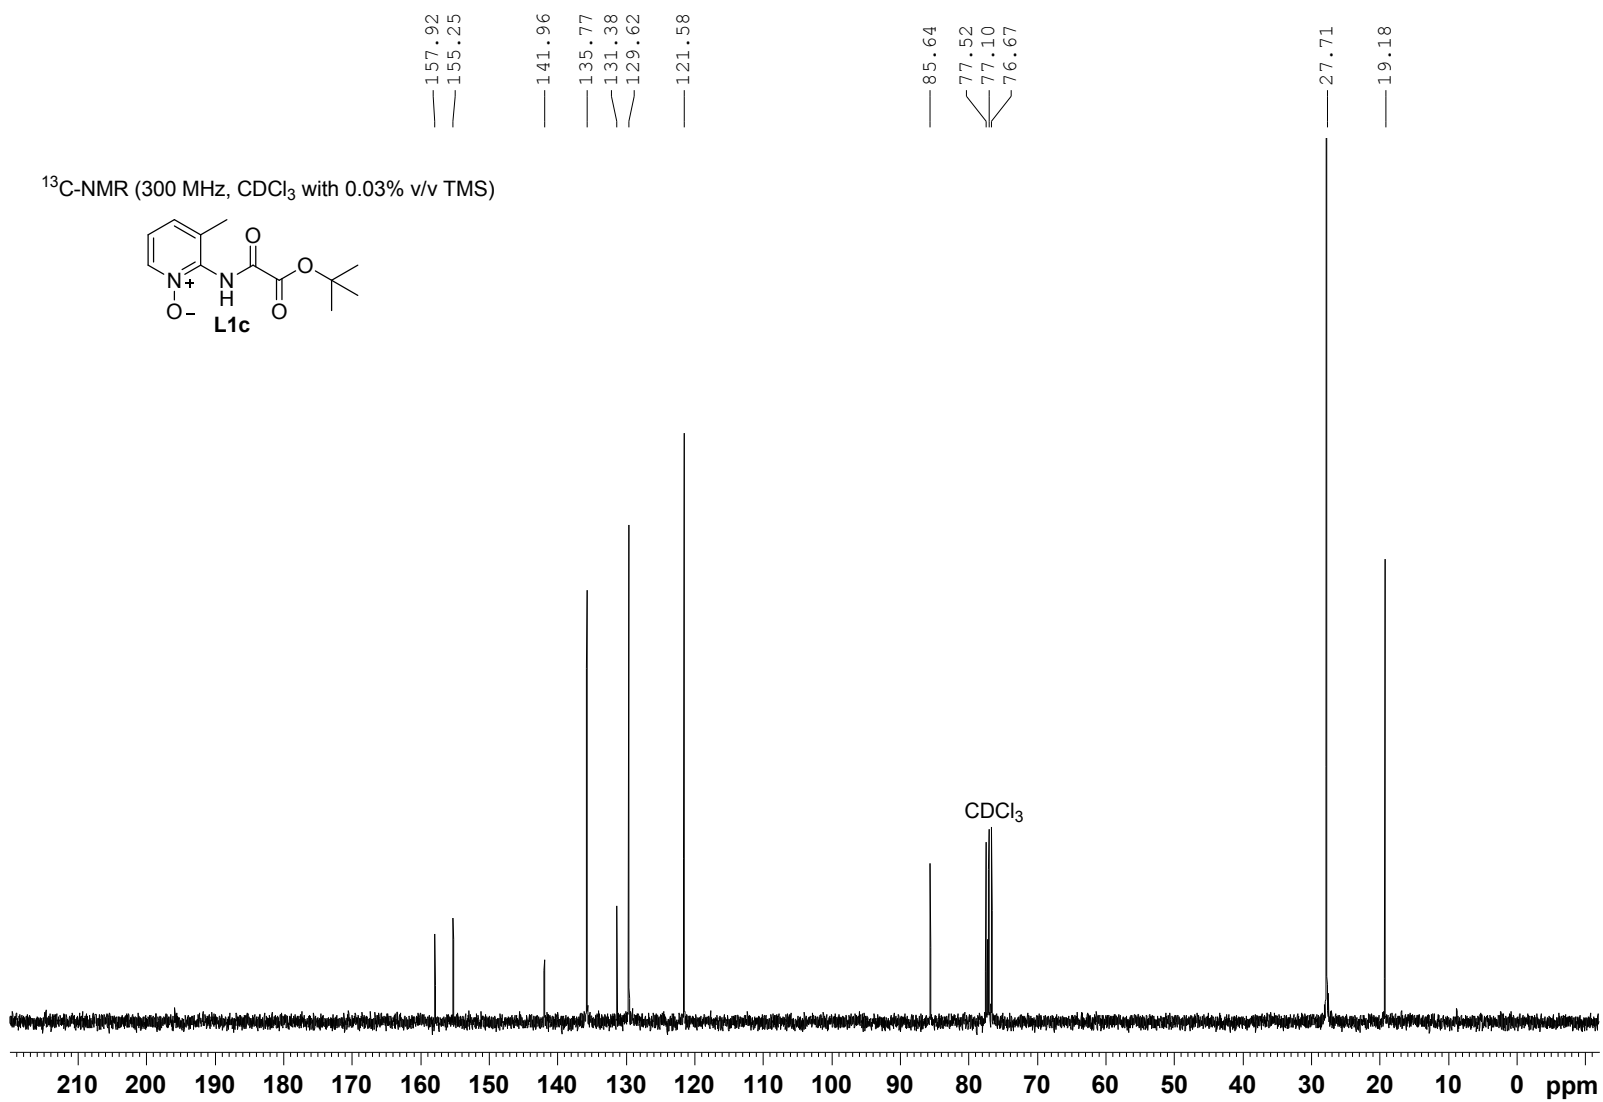

<sup>1</sup>H-NMR (300 MHz, DMSO-*d*<sub>6</sub> with 0.03% v/v TMS)

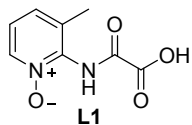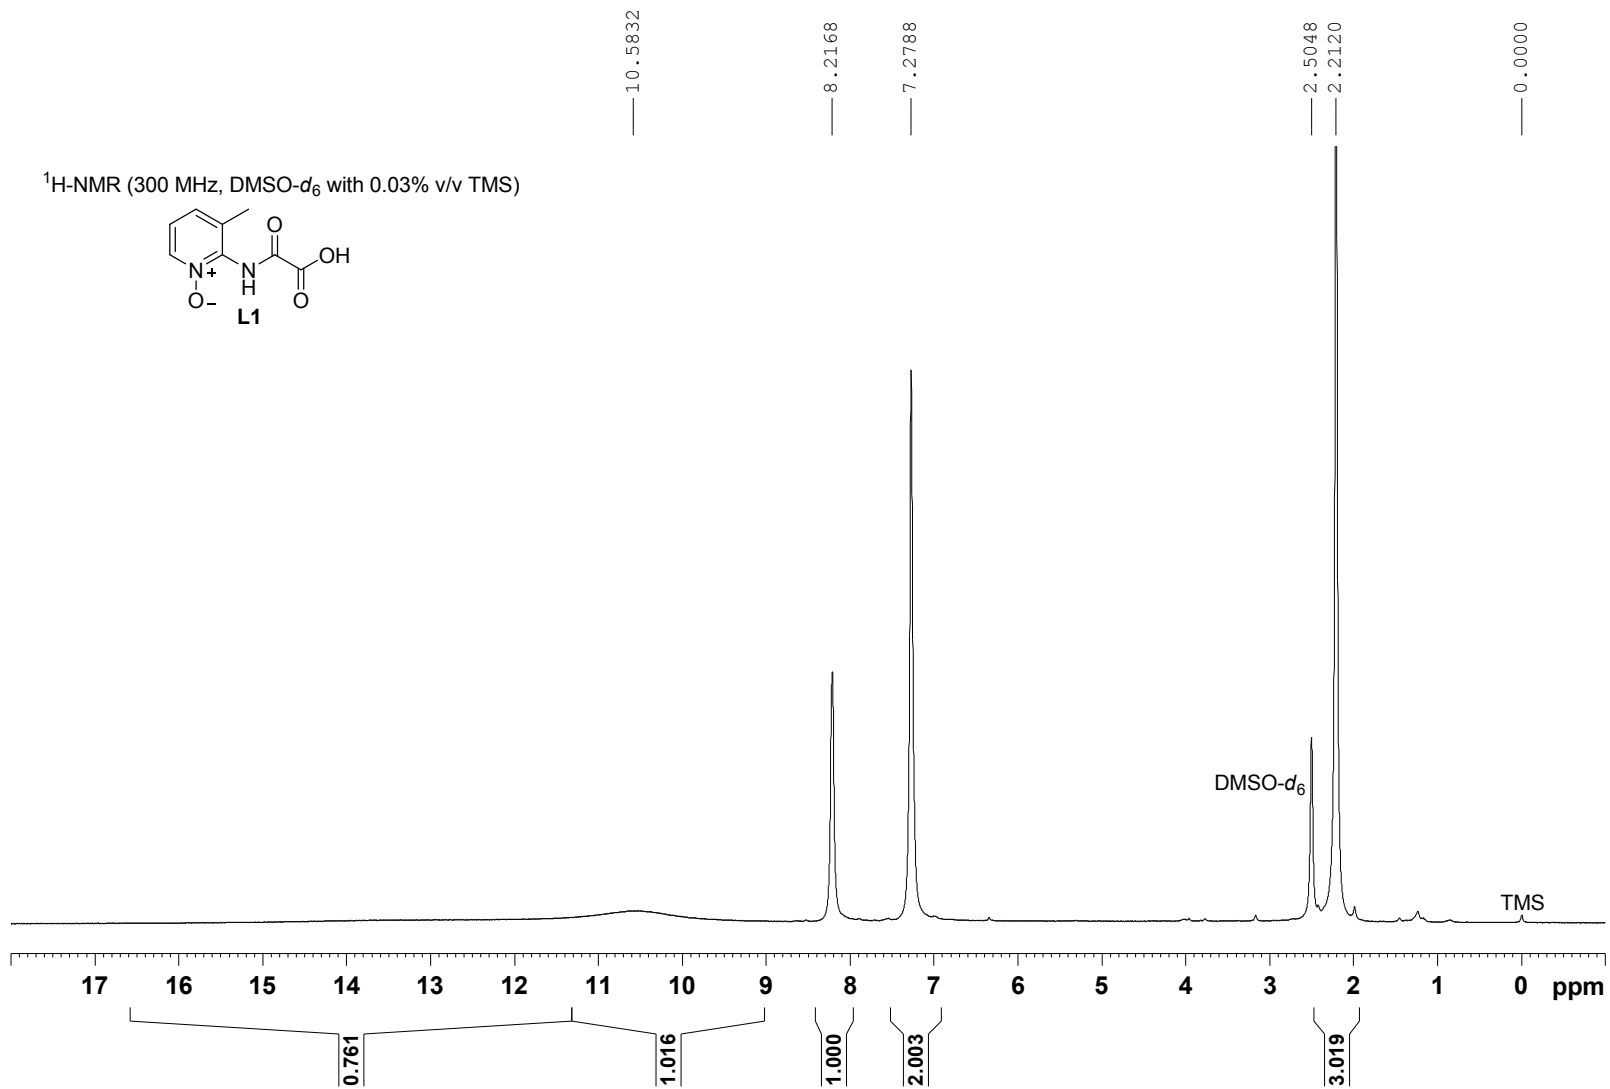

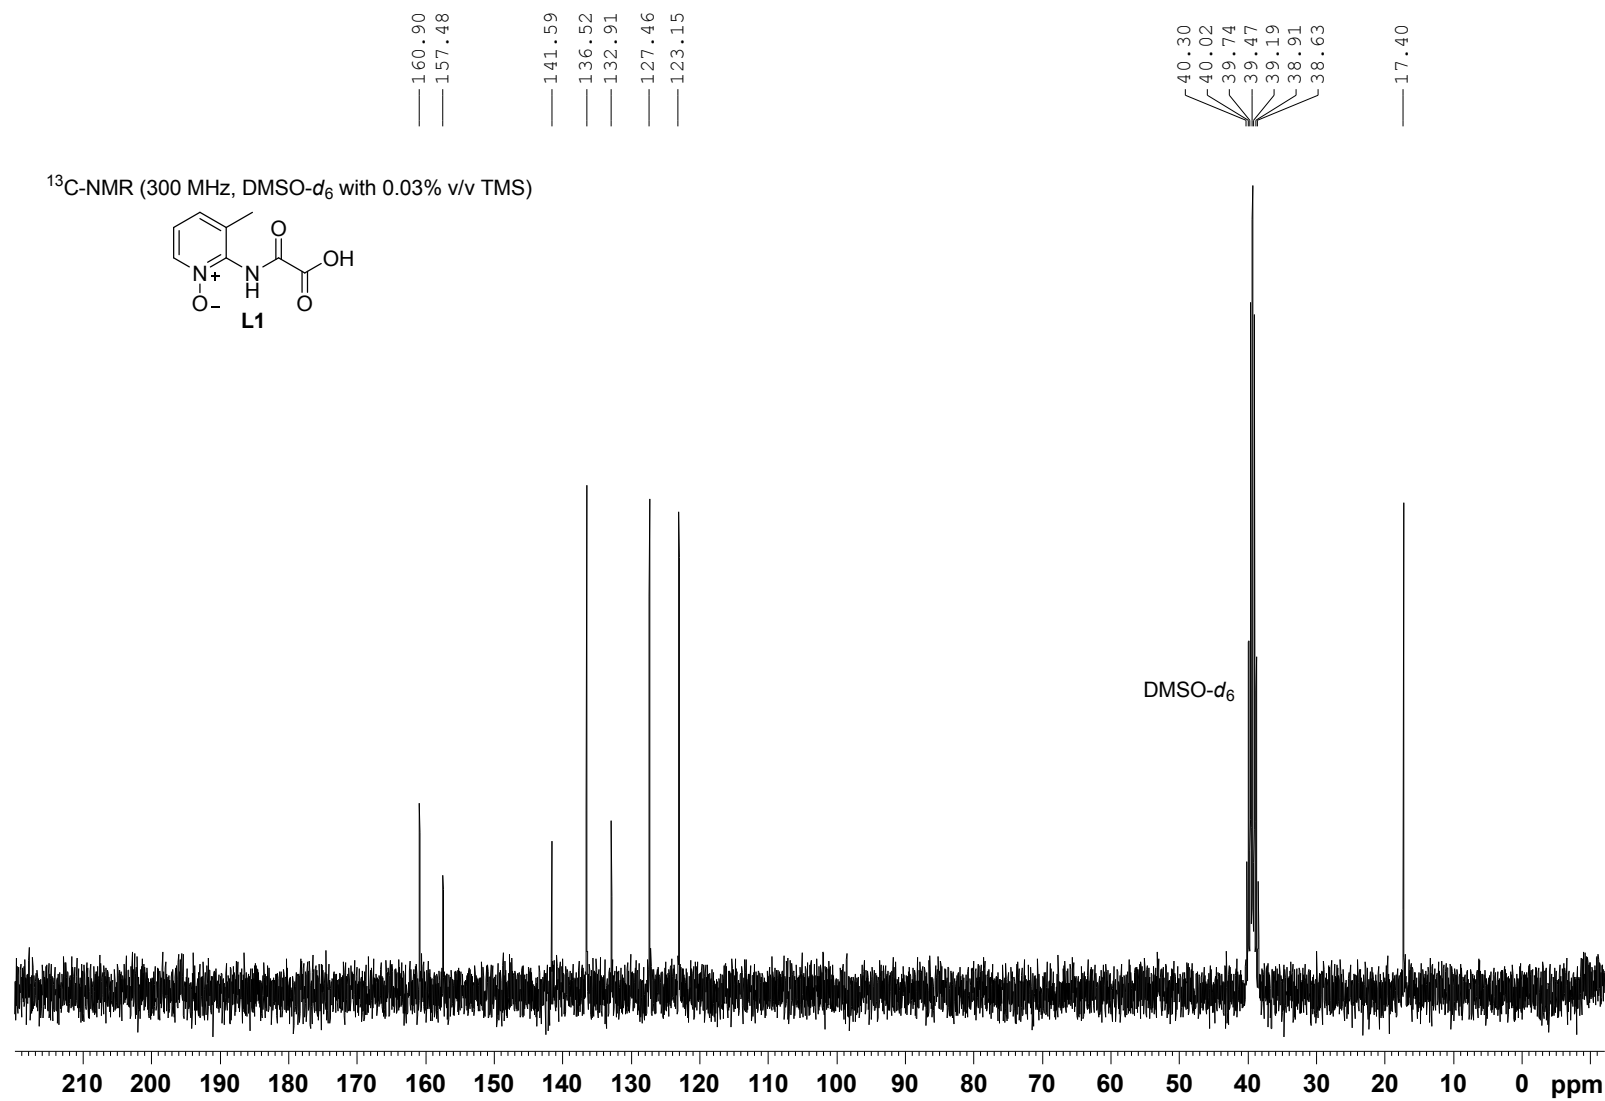

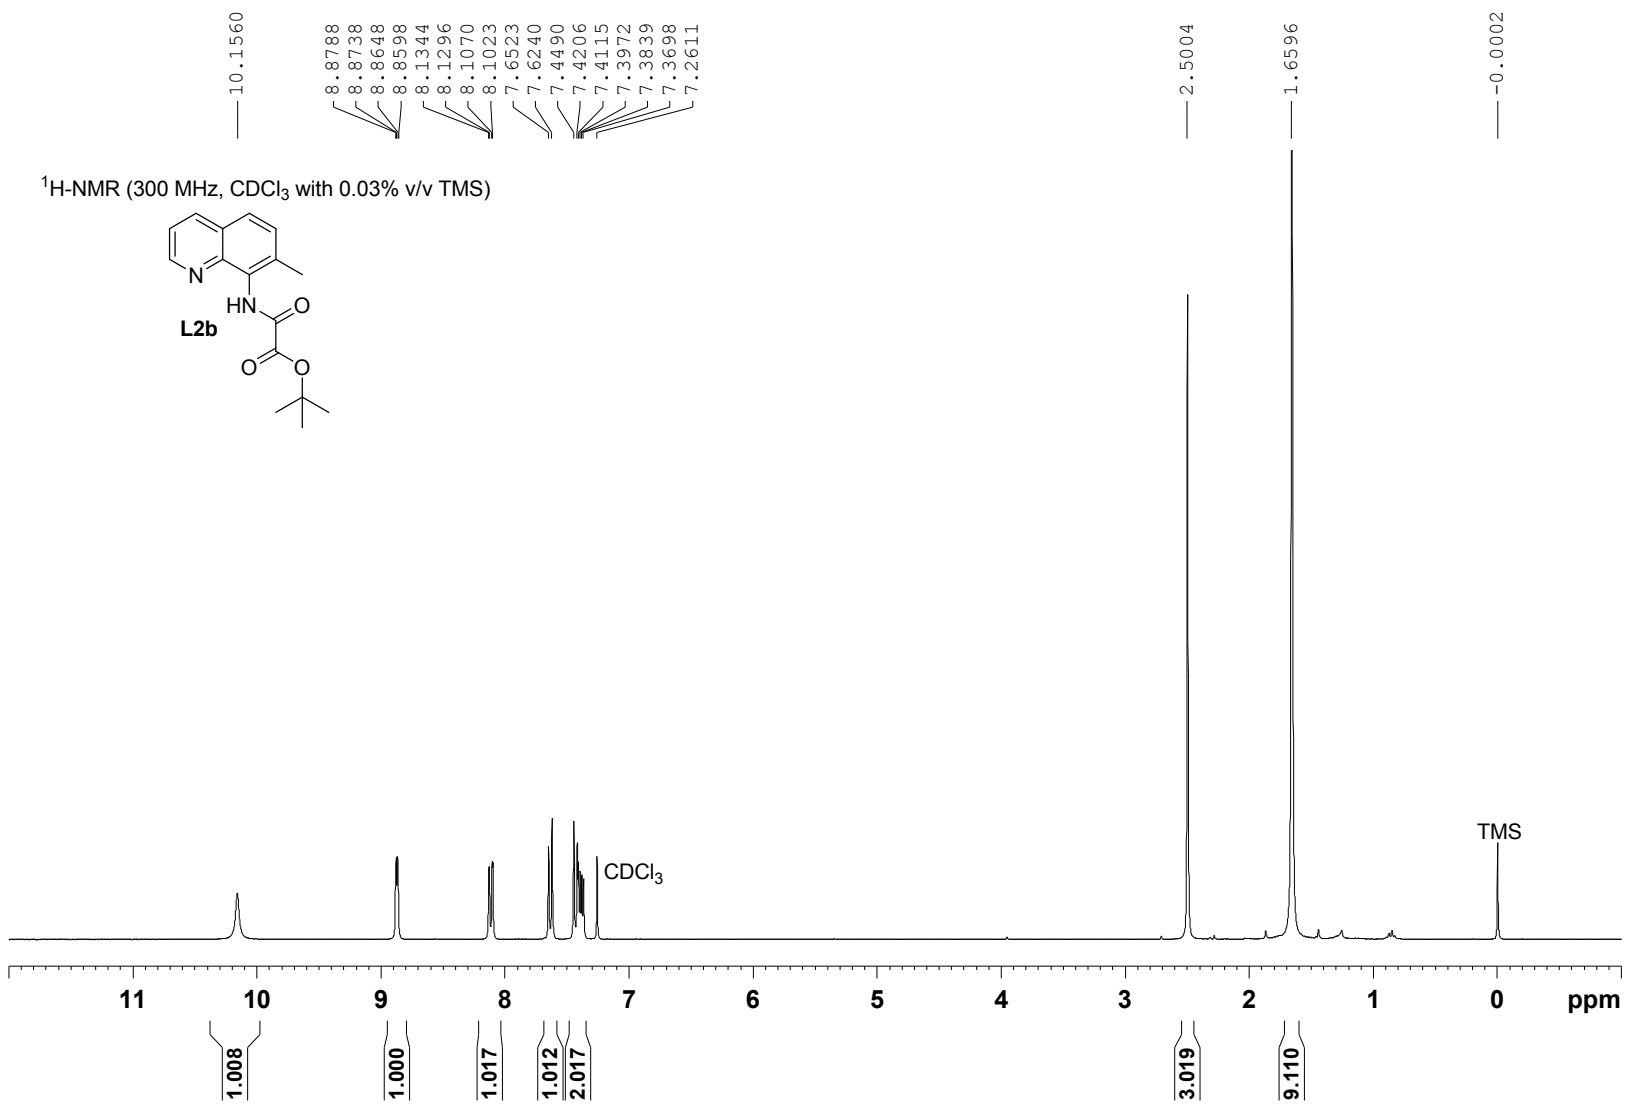

<sup>13</sup>C-NMR (300 MHz, CDCl<sub>3</sub> with 0.03% v/v TMS)

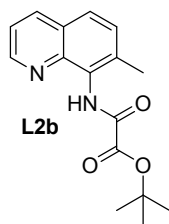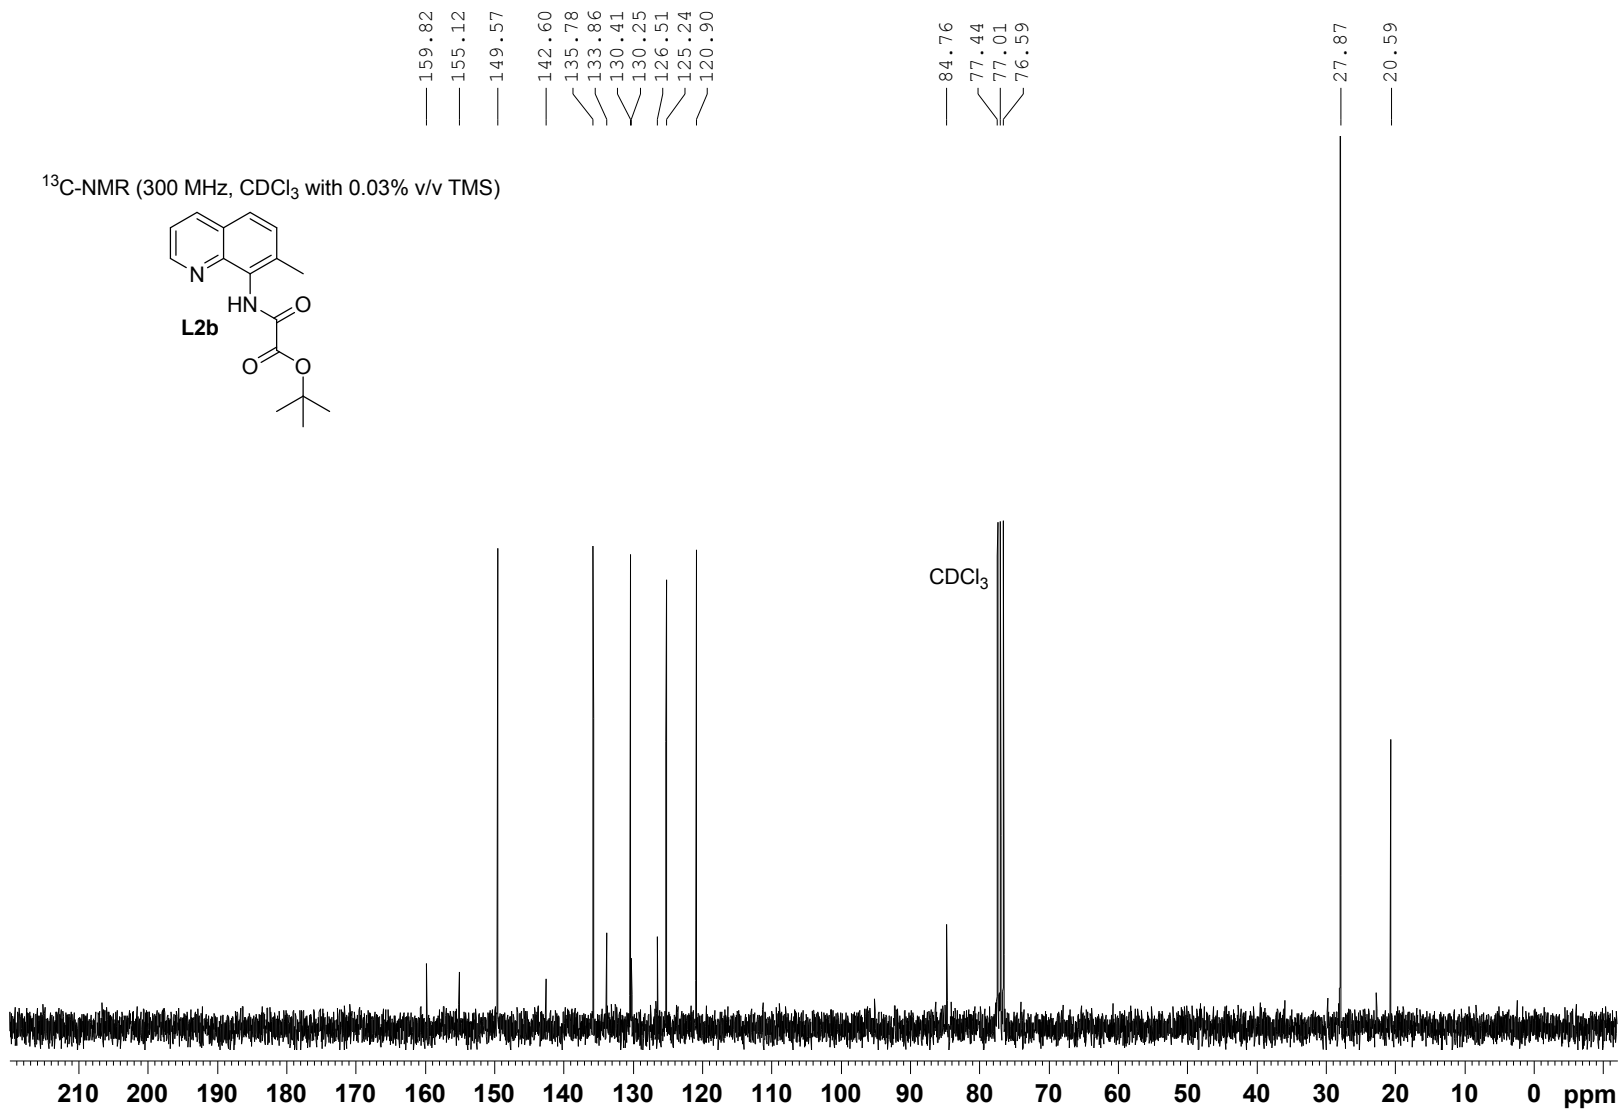



<sup>1</sup>H-NMR (300 MHz, CDCl<sub>3</sub> with 0.03% v/v TMS)

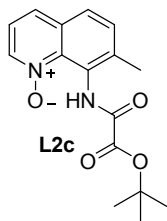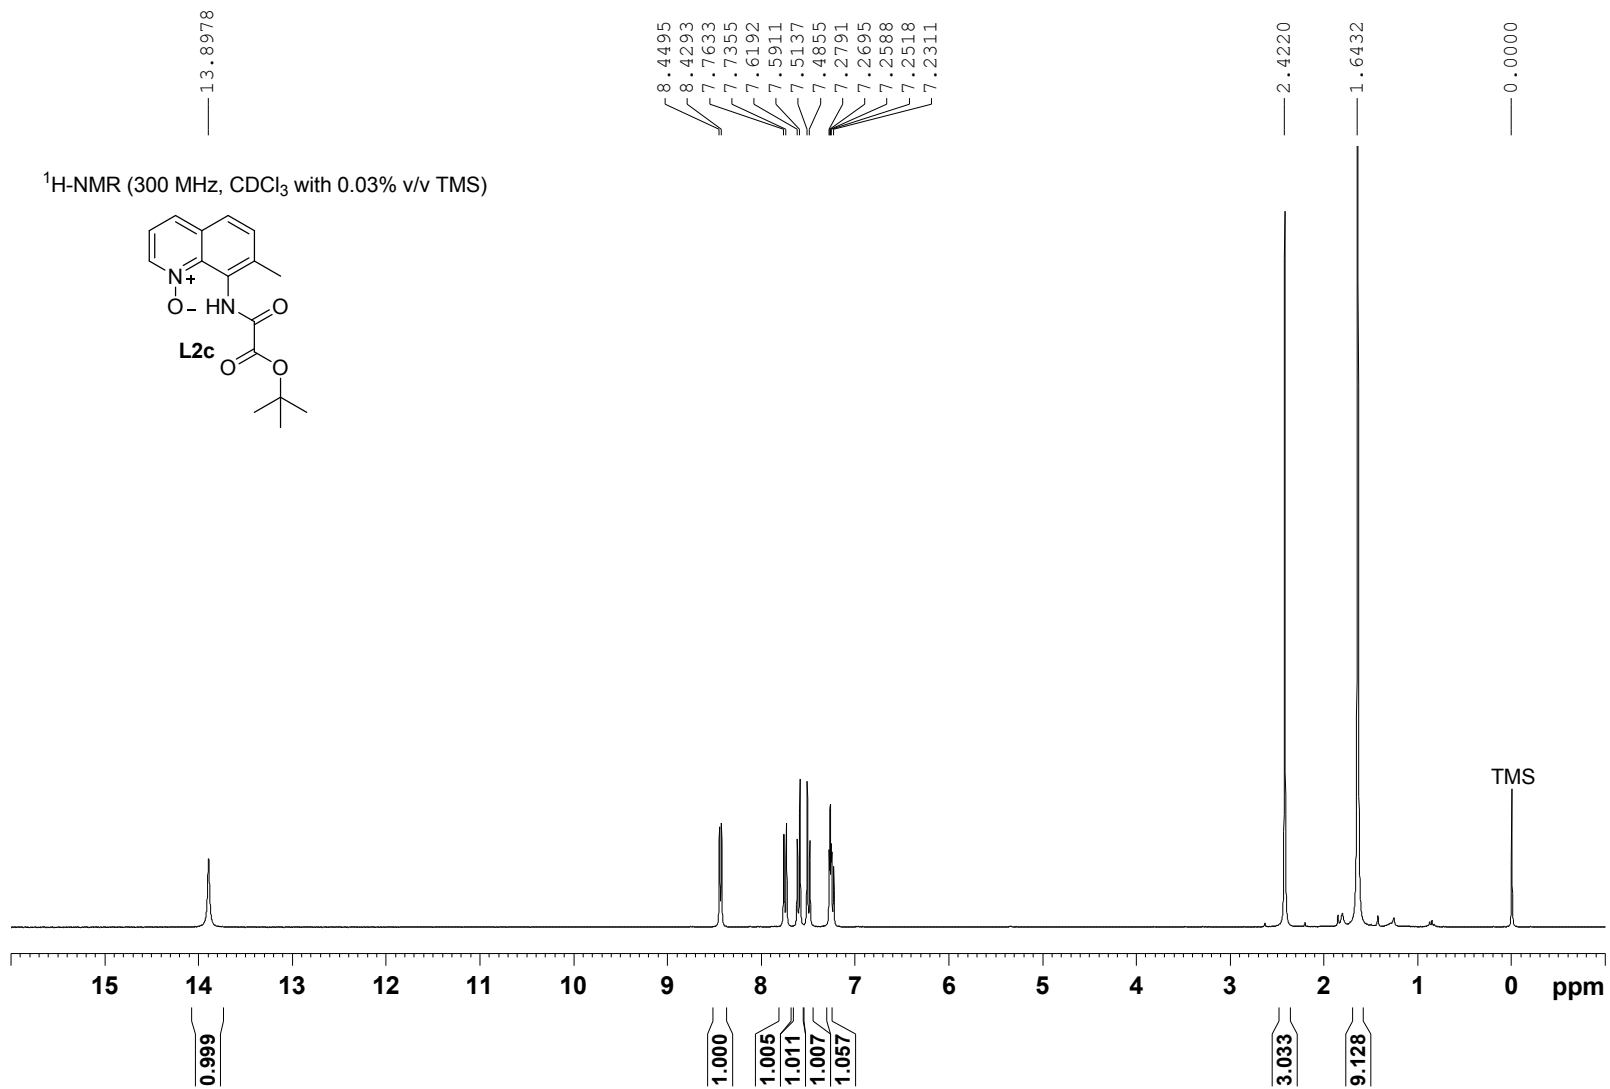

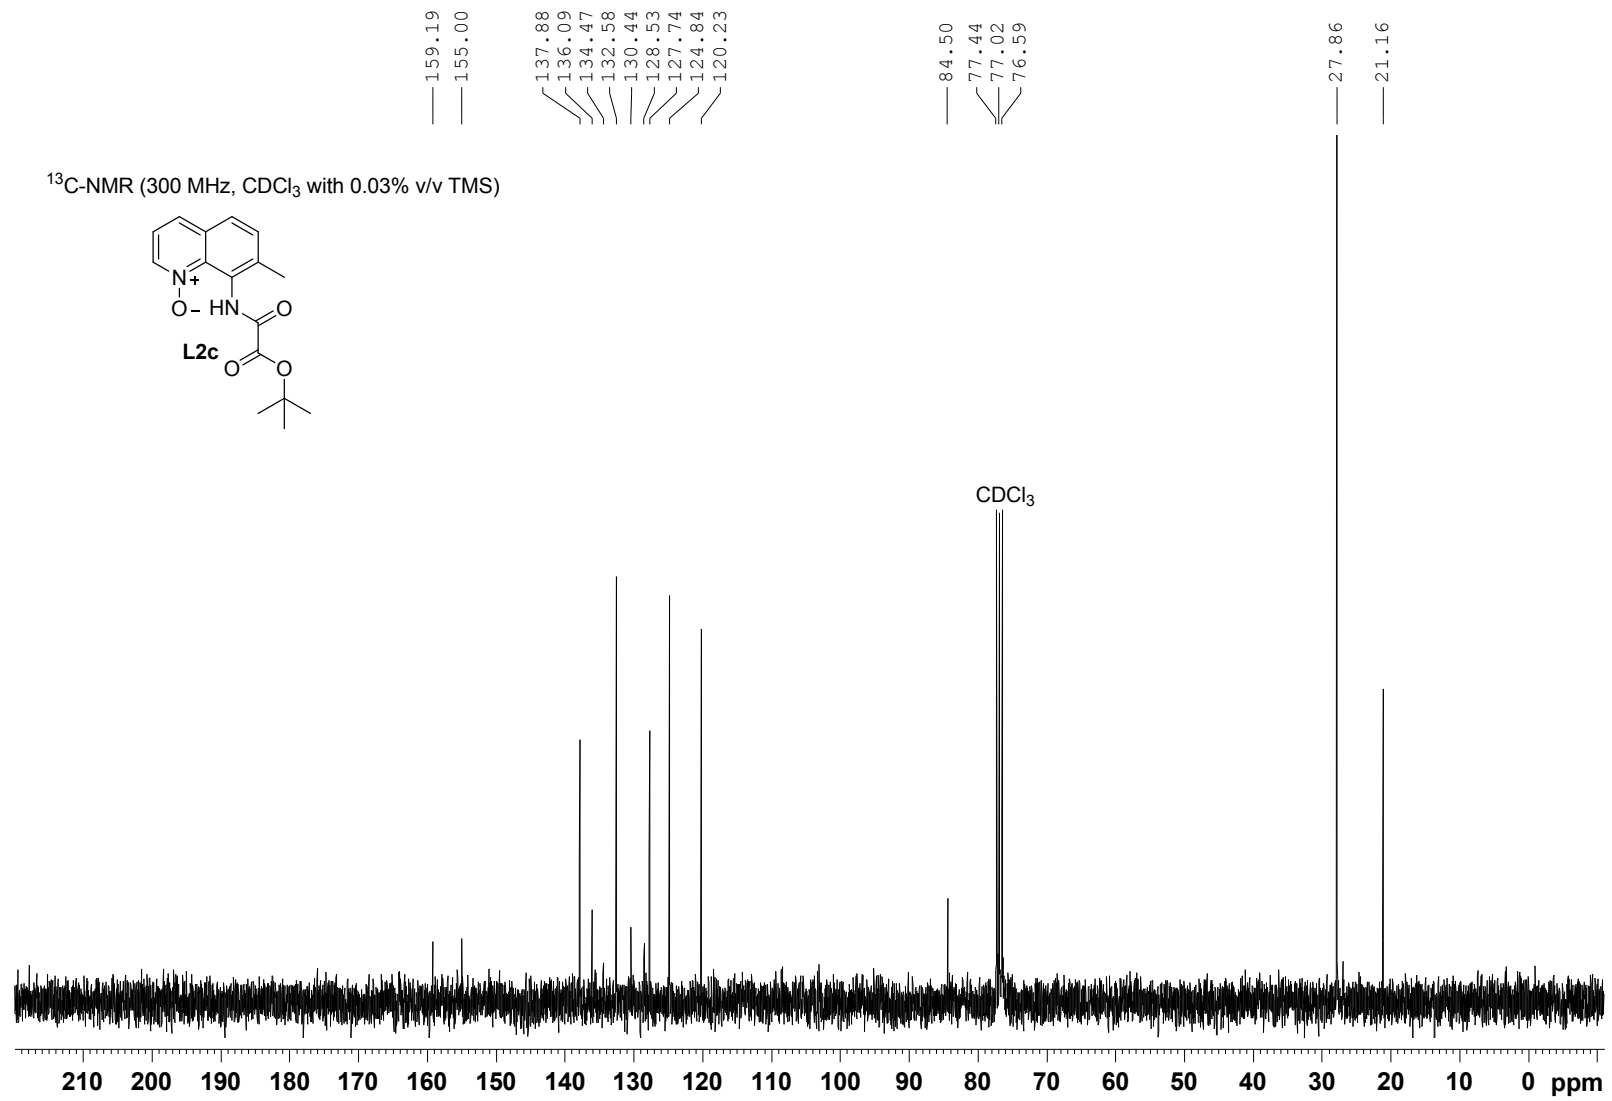

<sup>1</sup>H-NMR (300 MHz, DMSO-*d*<sub>6</sub> with 0.03% v/v TMS)

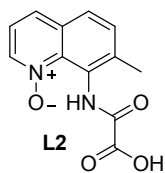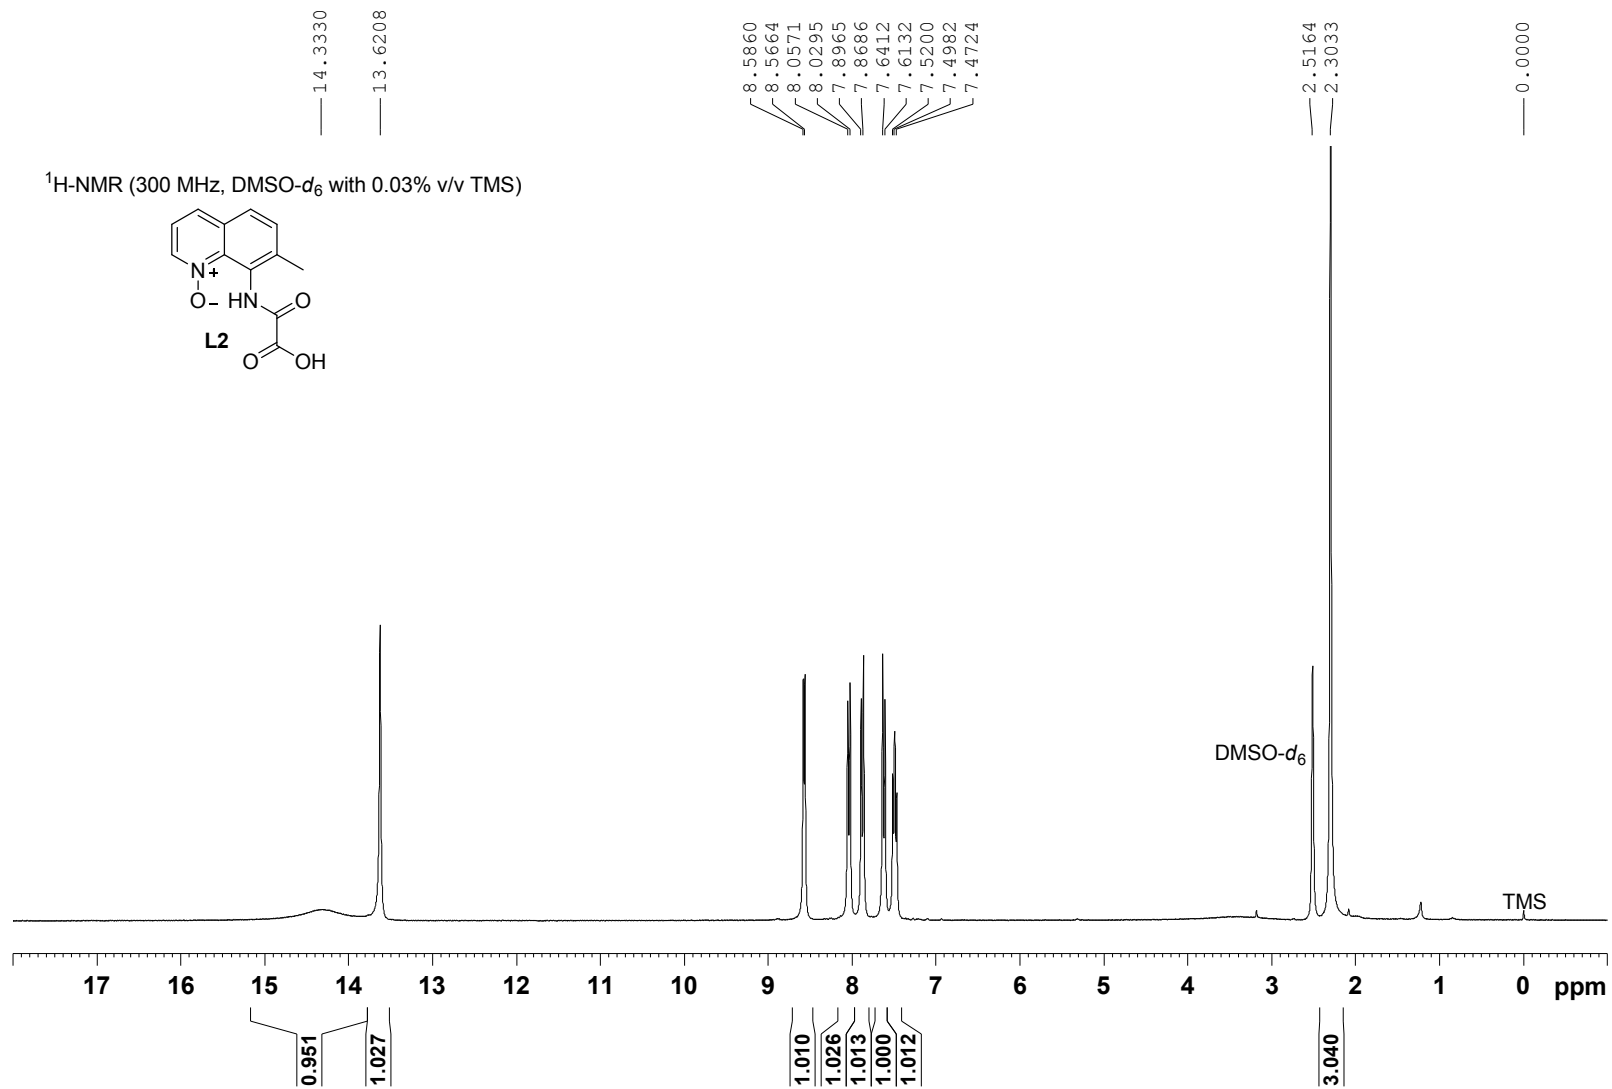

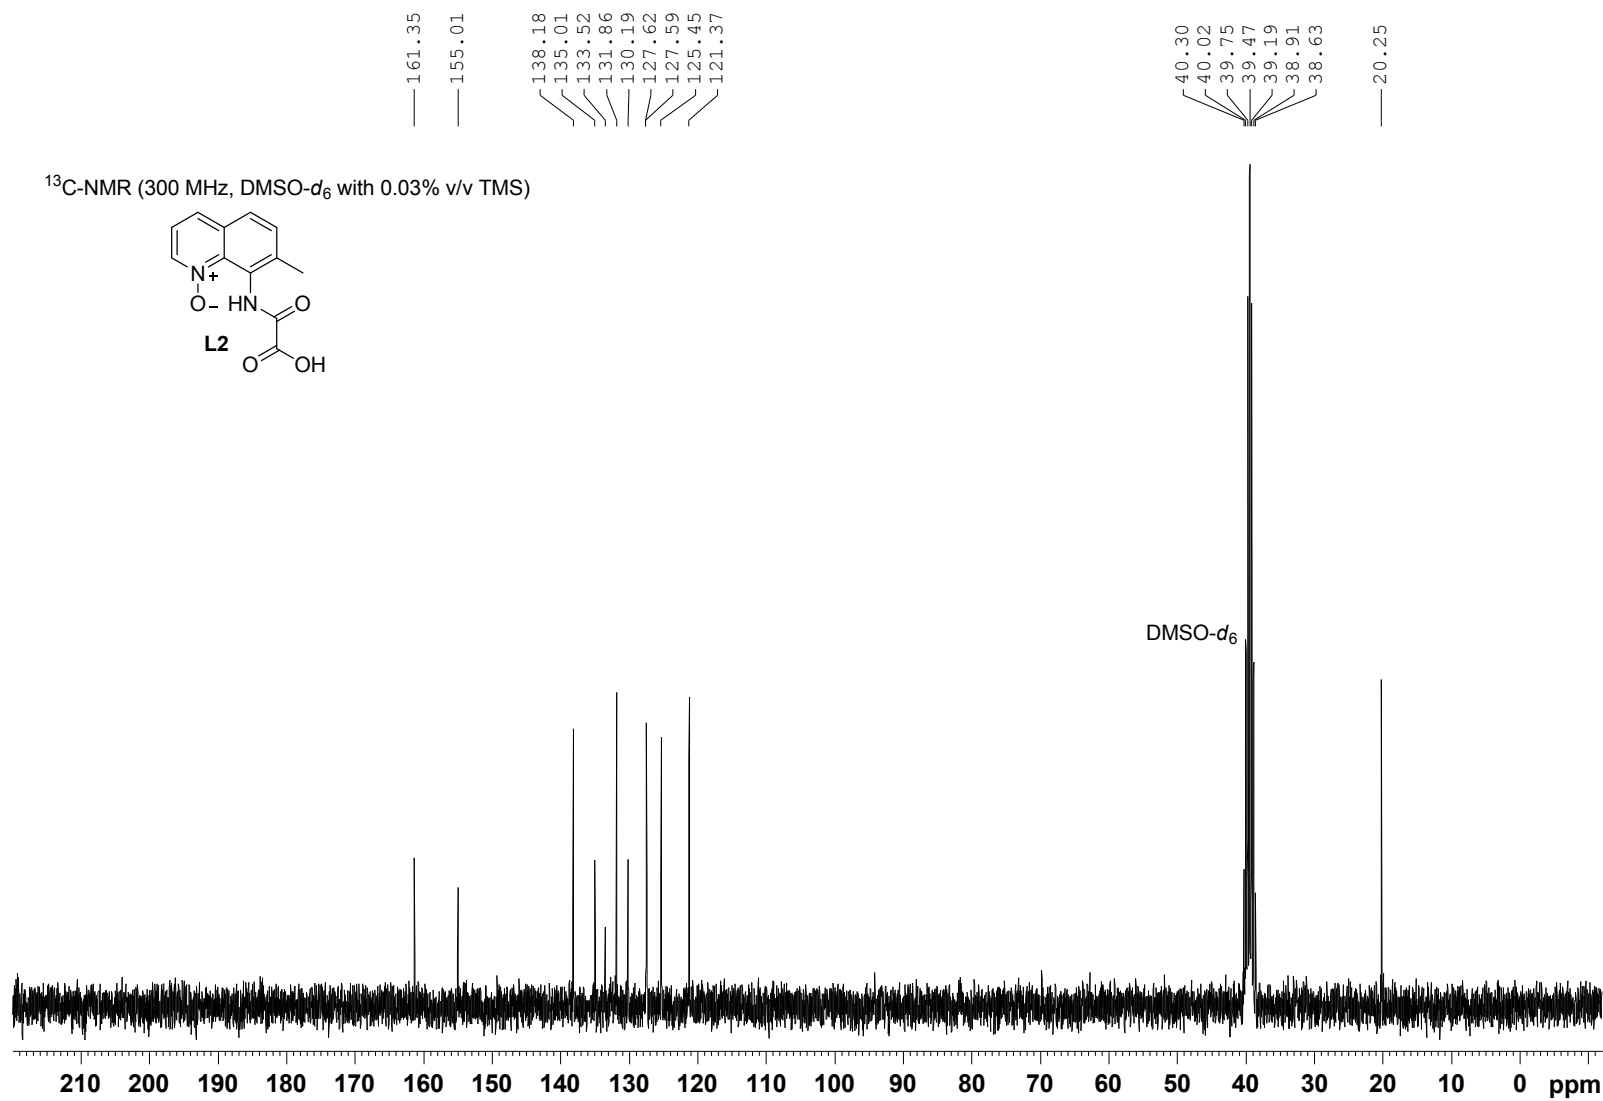

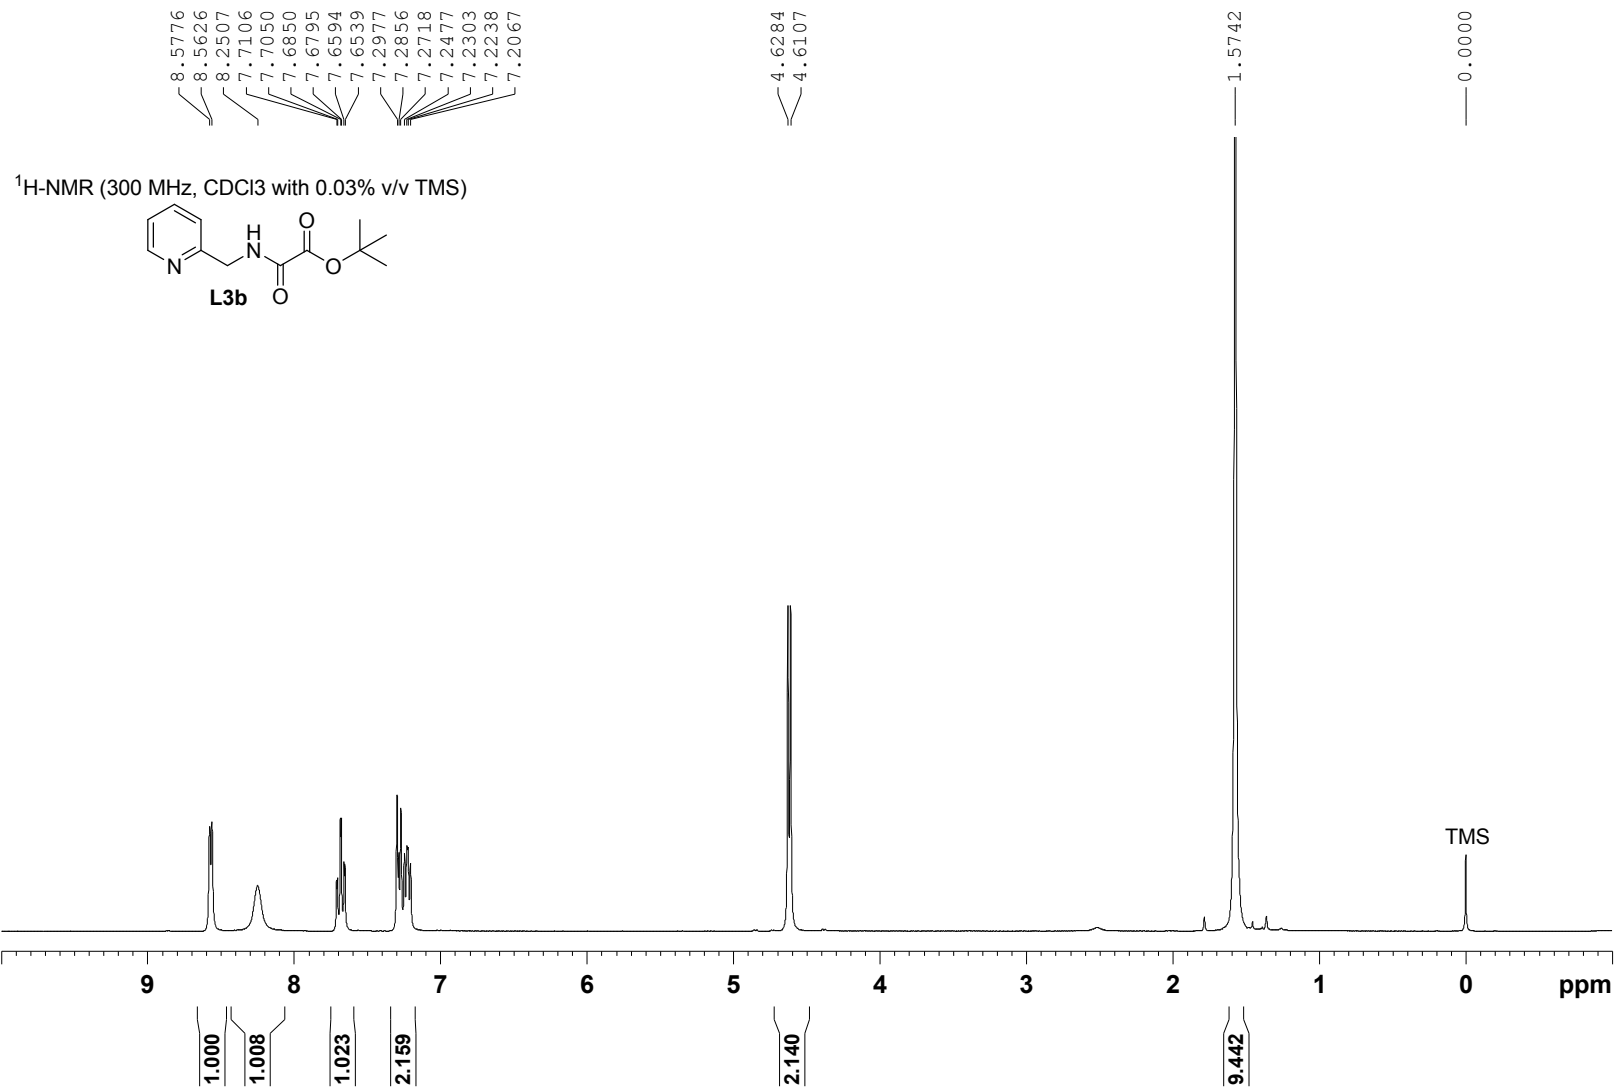

<sup>13</sup>C-NMR (300 MHz, CDCl<sub>3</sub> with 0.03% v/v TMS)

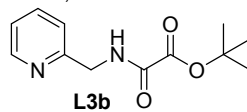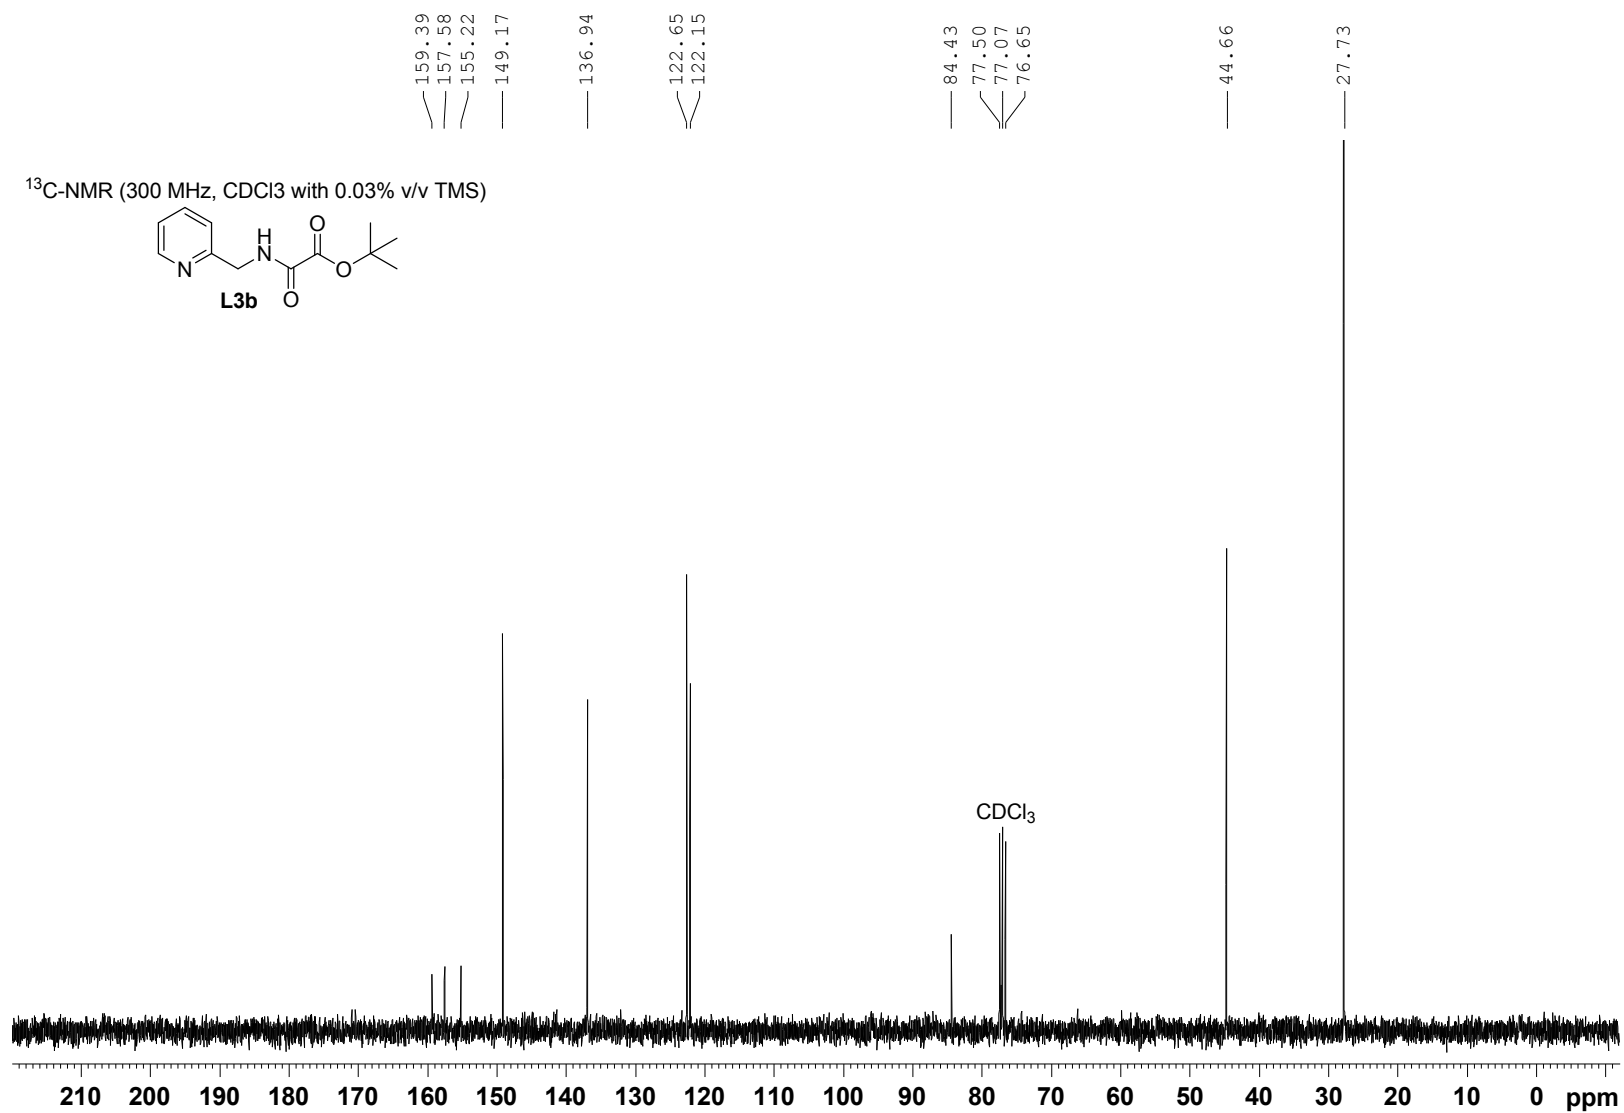

<sup>1</sup>H-NMR (300 MHz, CDCl<sub>3</sub> with 0.03% v/v TMS)

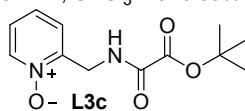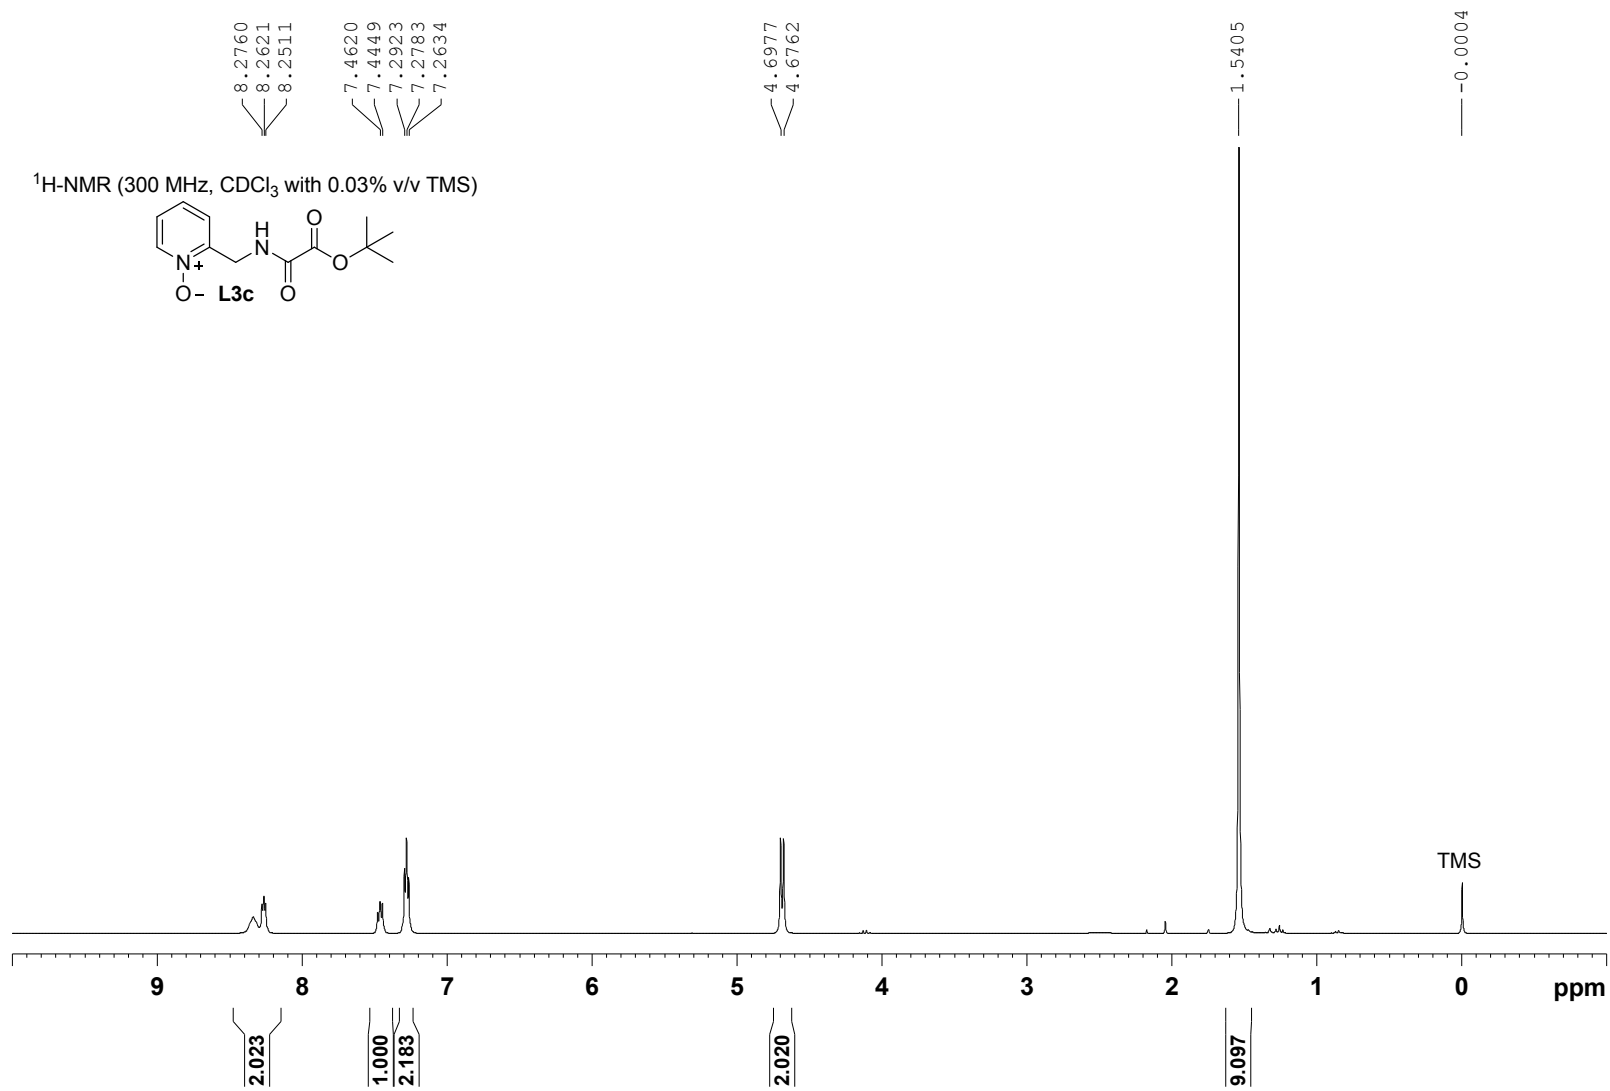

<sup>13</sup>C-NMR (300 MHz, CDCl<sub>3</sub> with 0.03% v/v TMS)

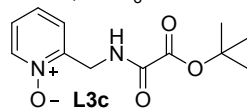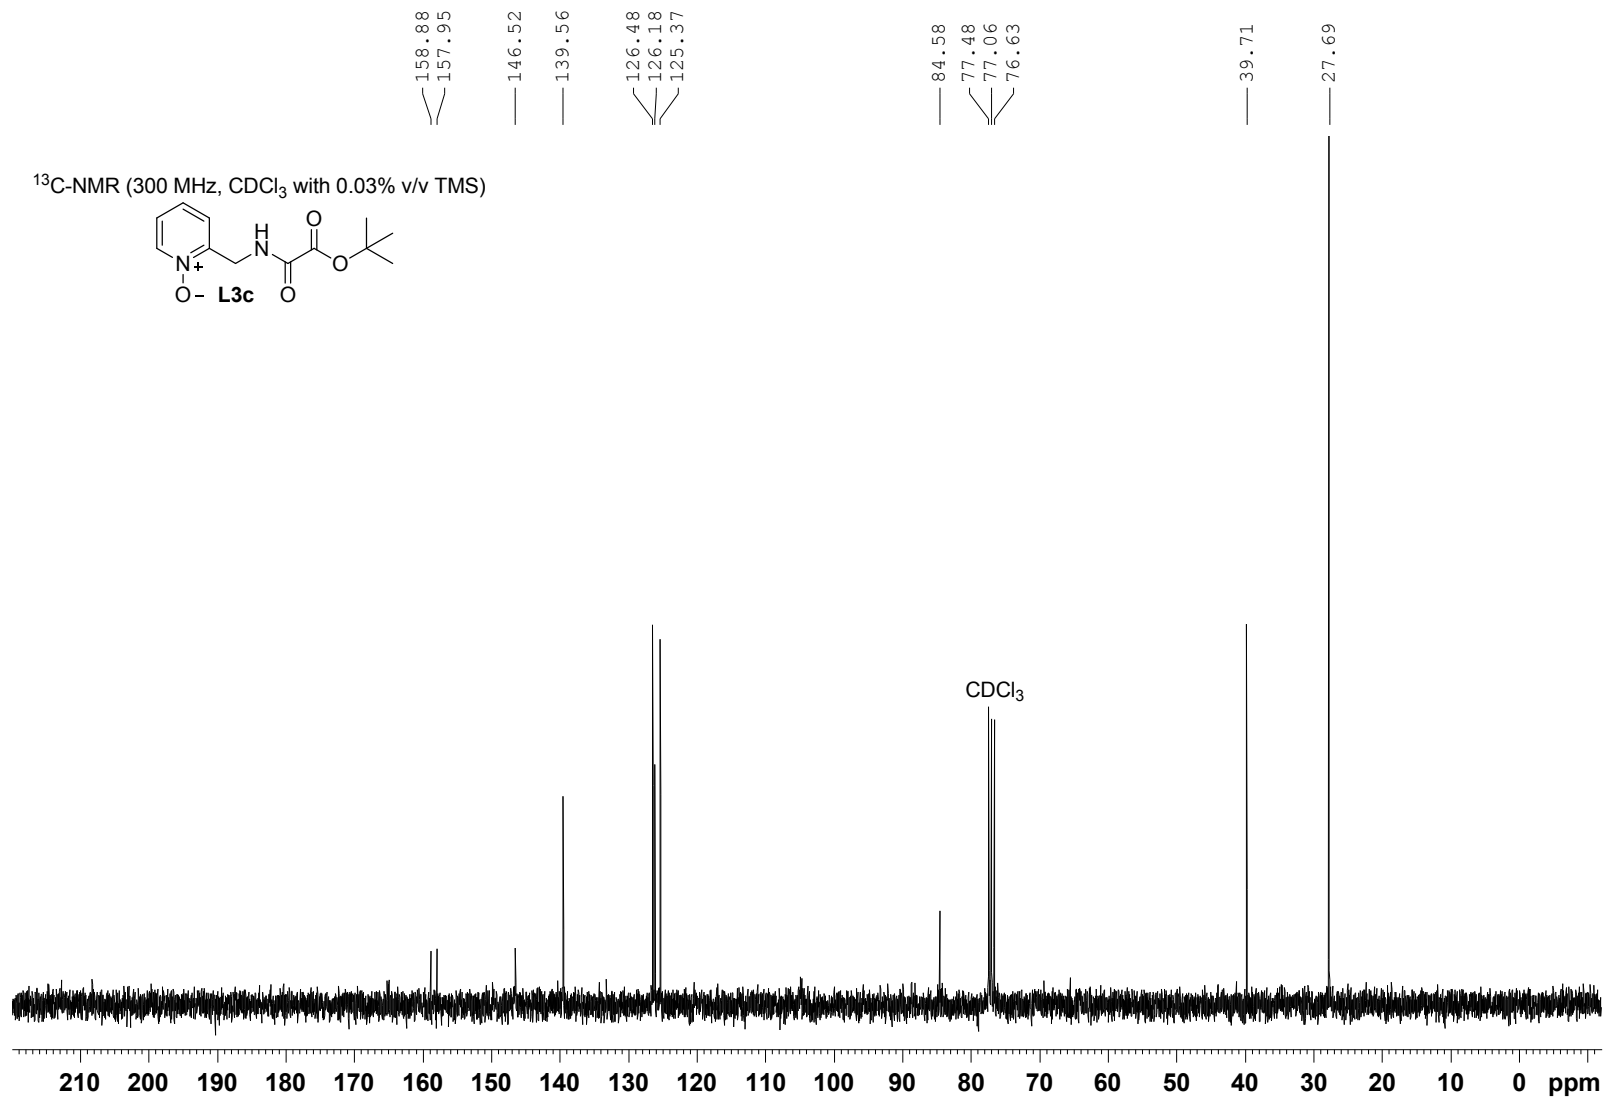



<sup>1</sup>H-NMR (300 MHz, DMSO-*d*<sub>6</sub> with 0.03% v/v TMS)

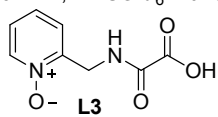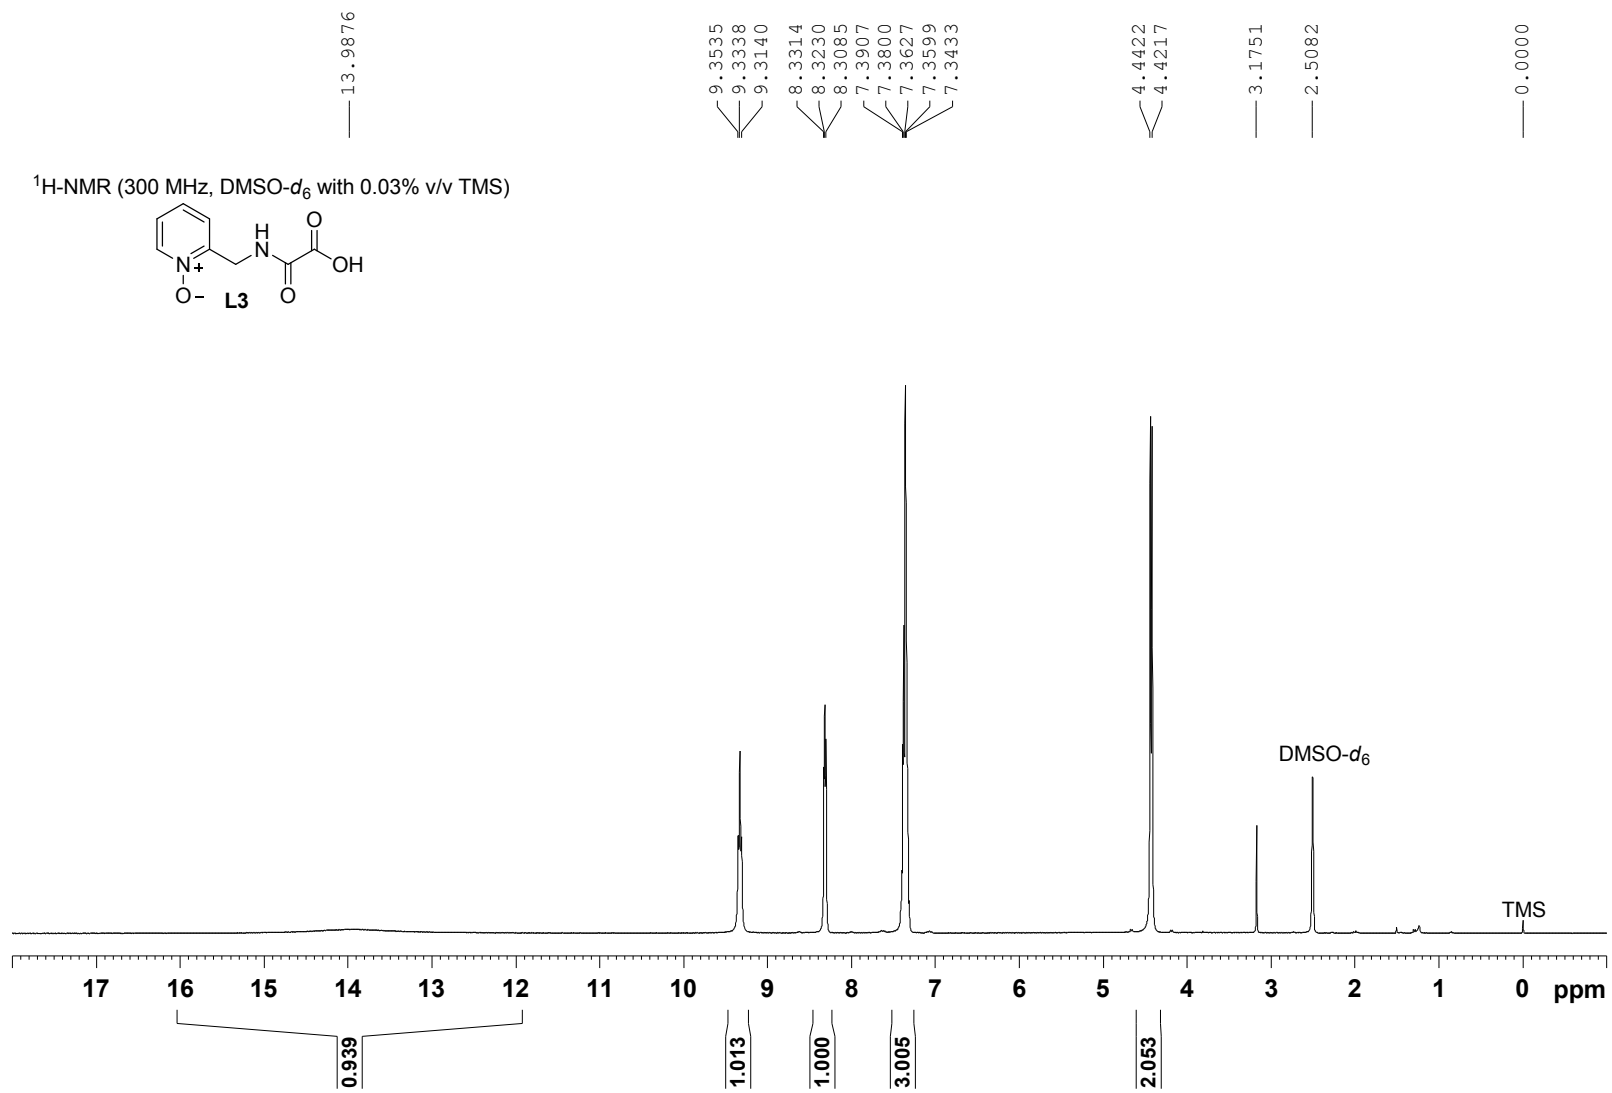

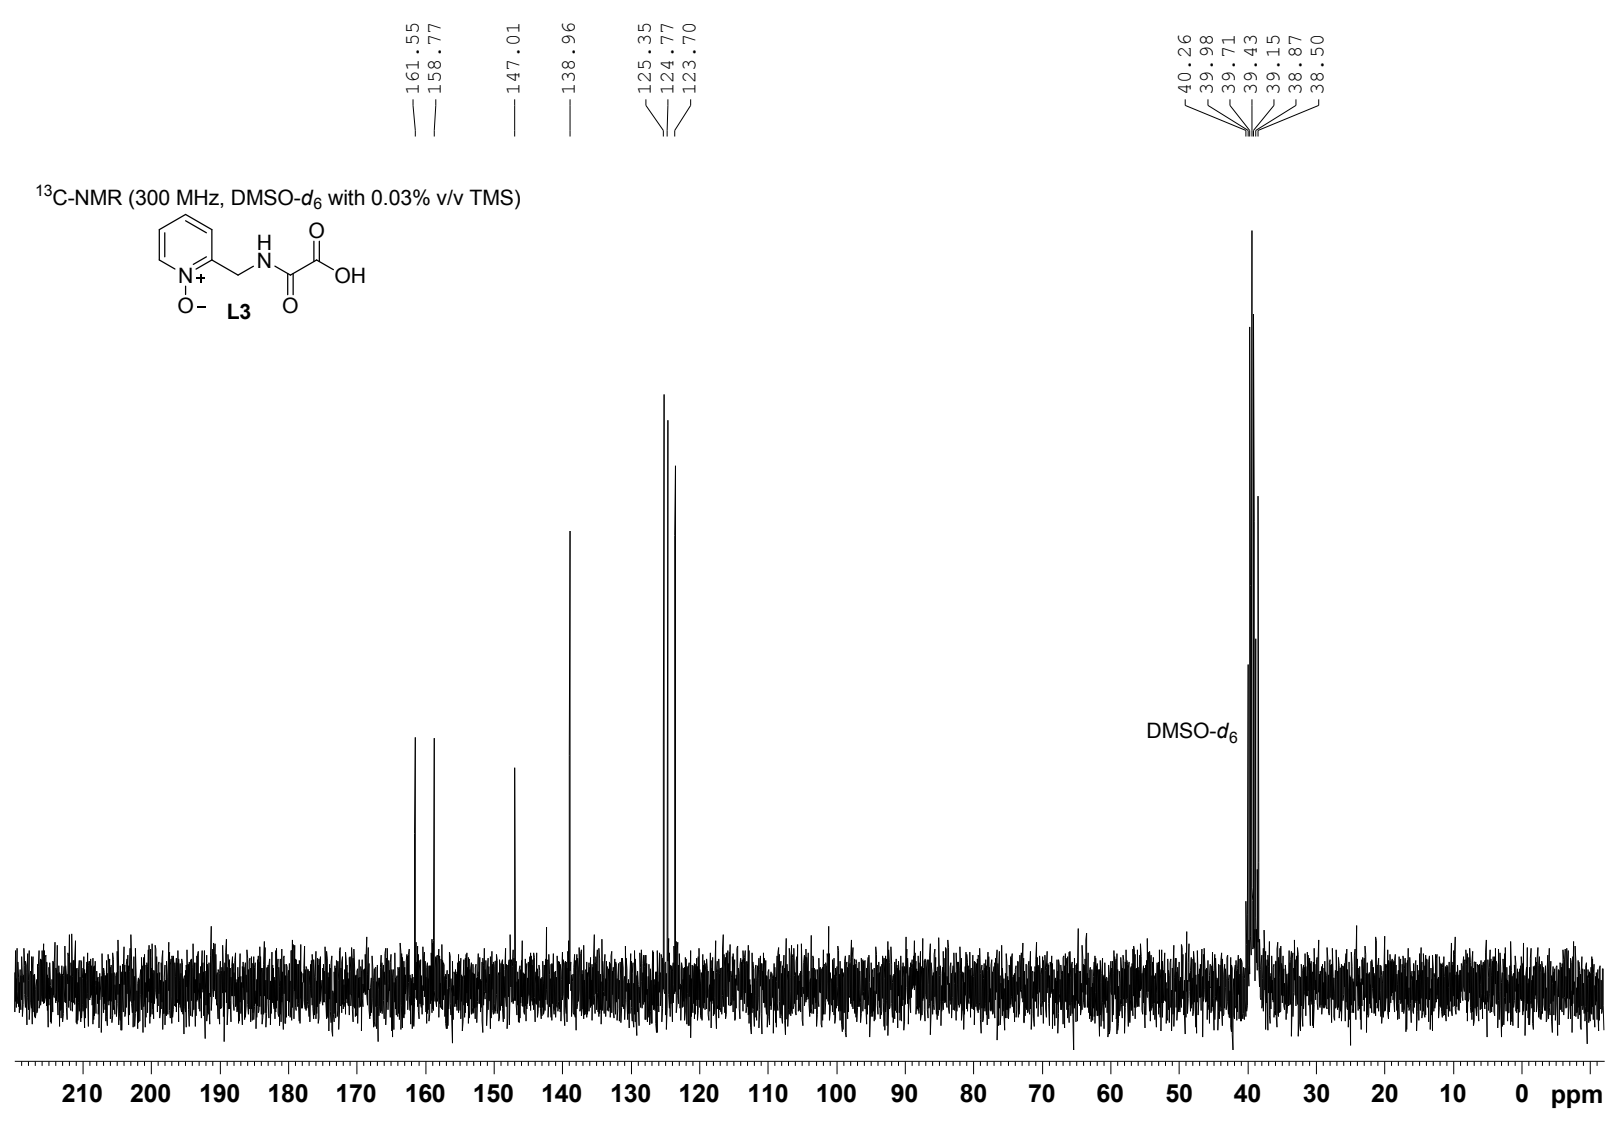

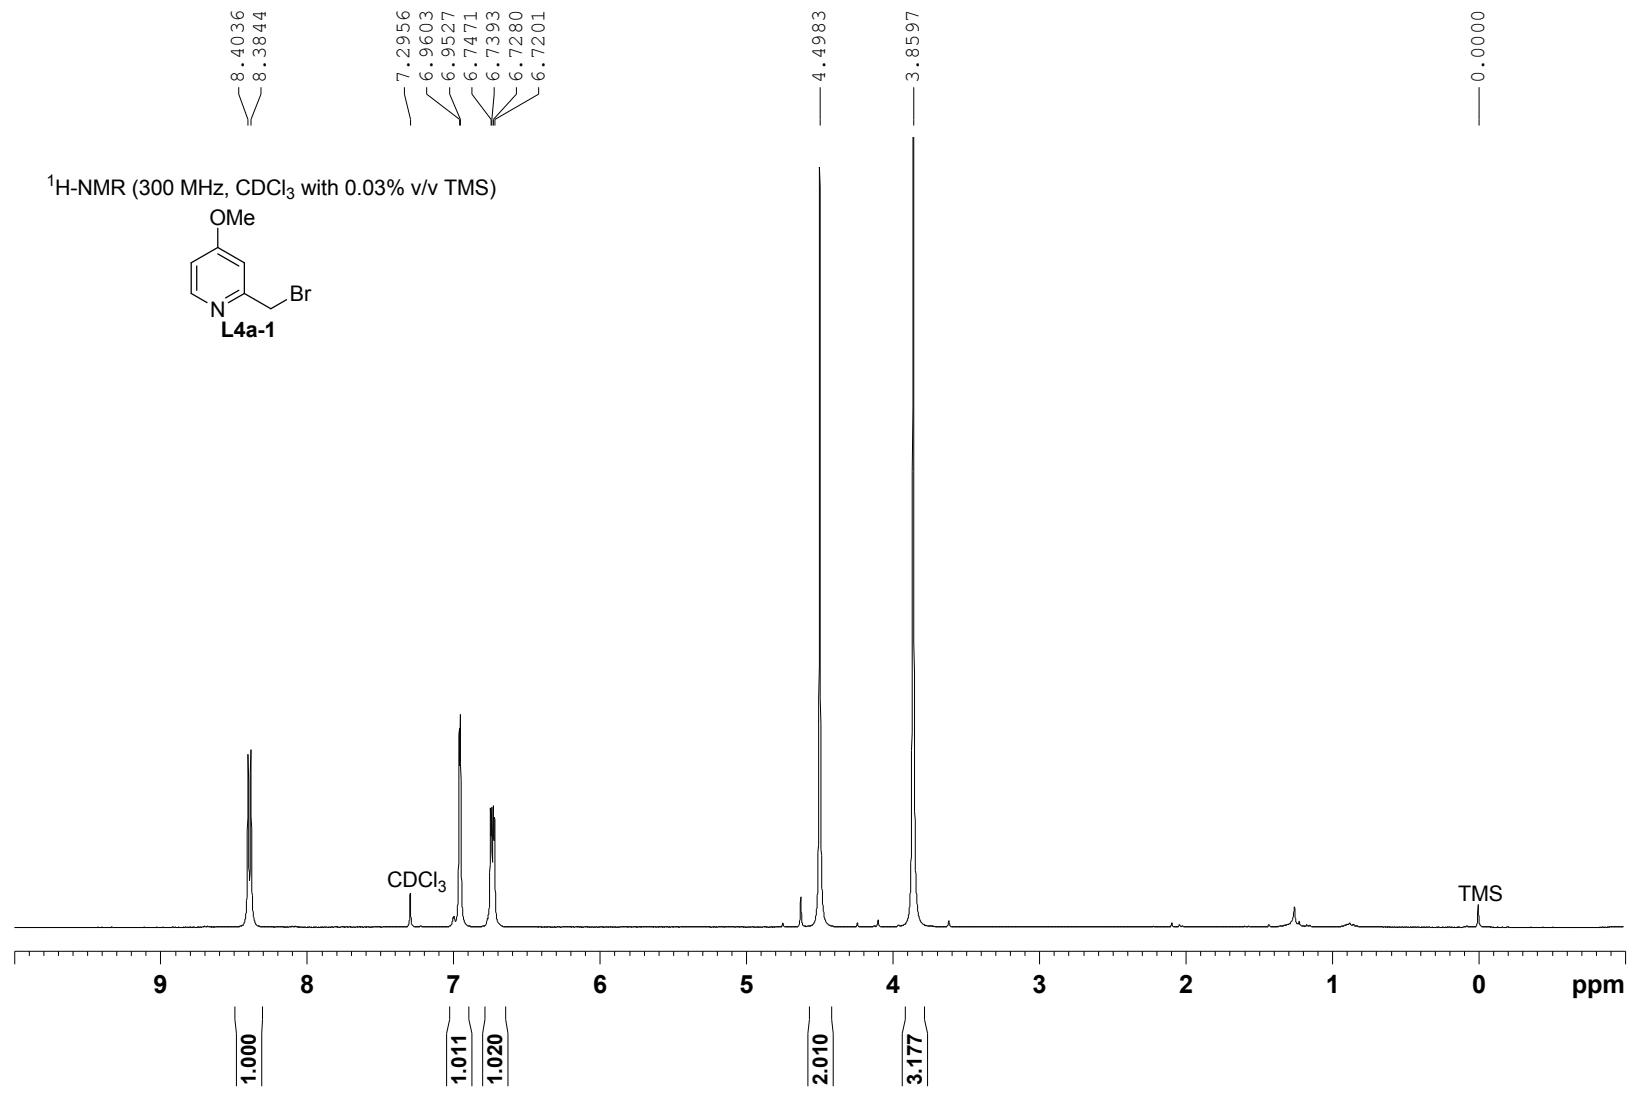

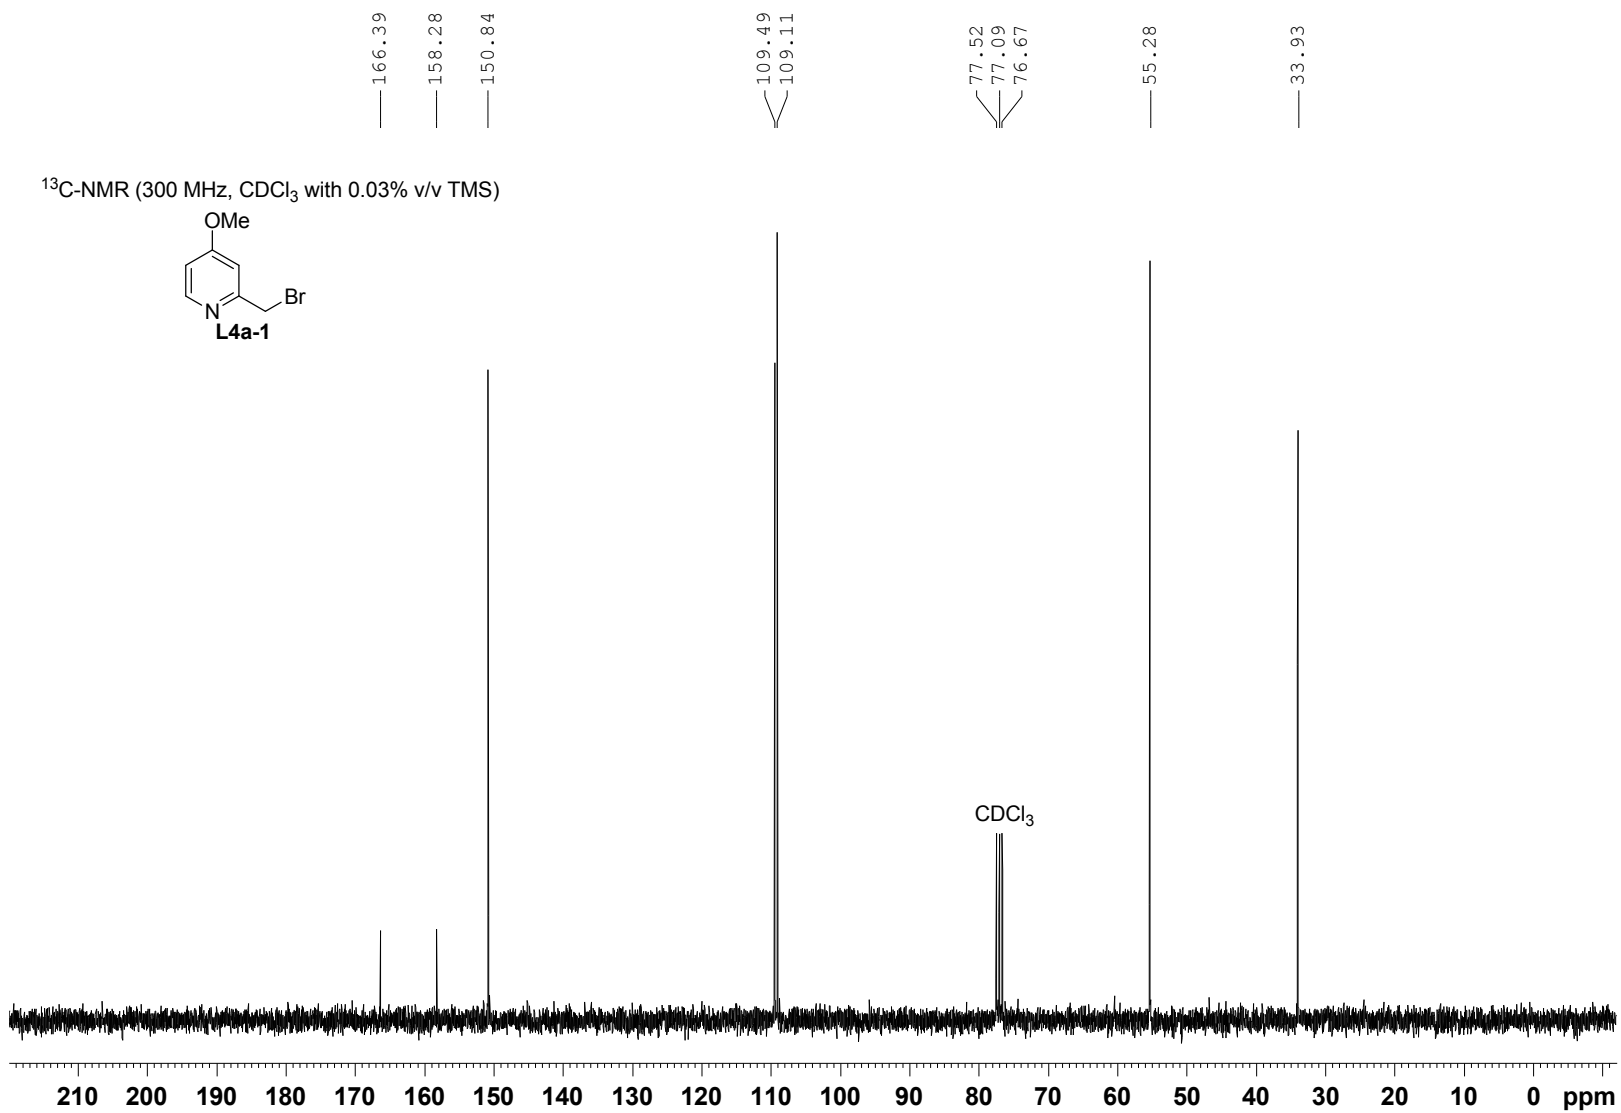

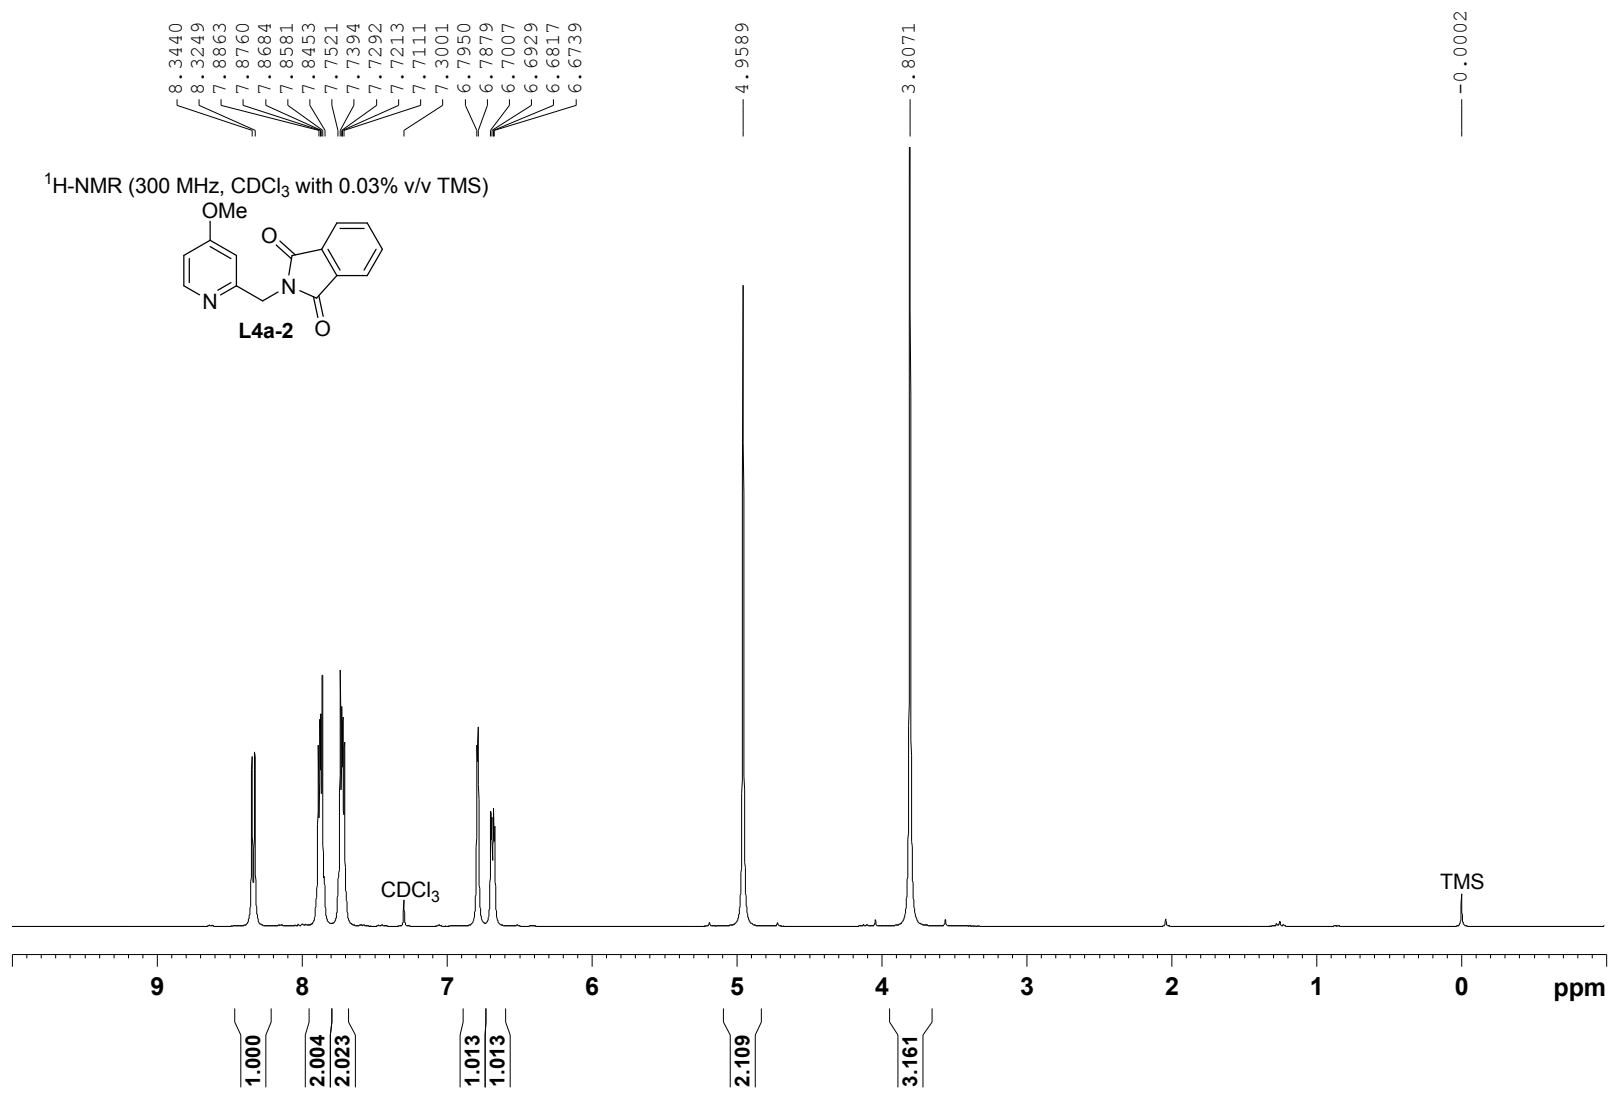

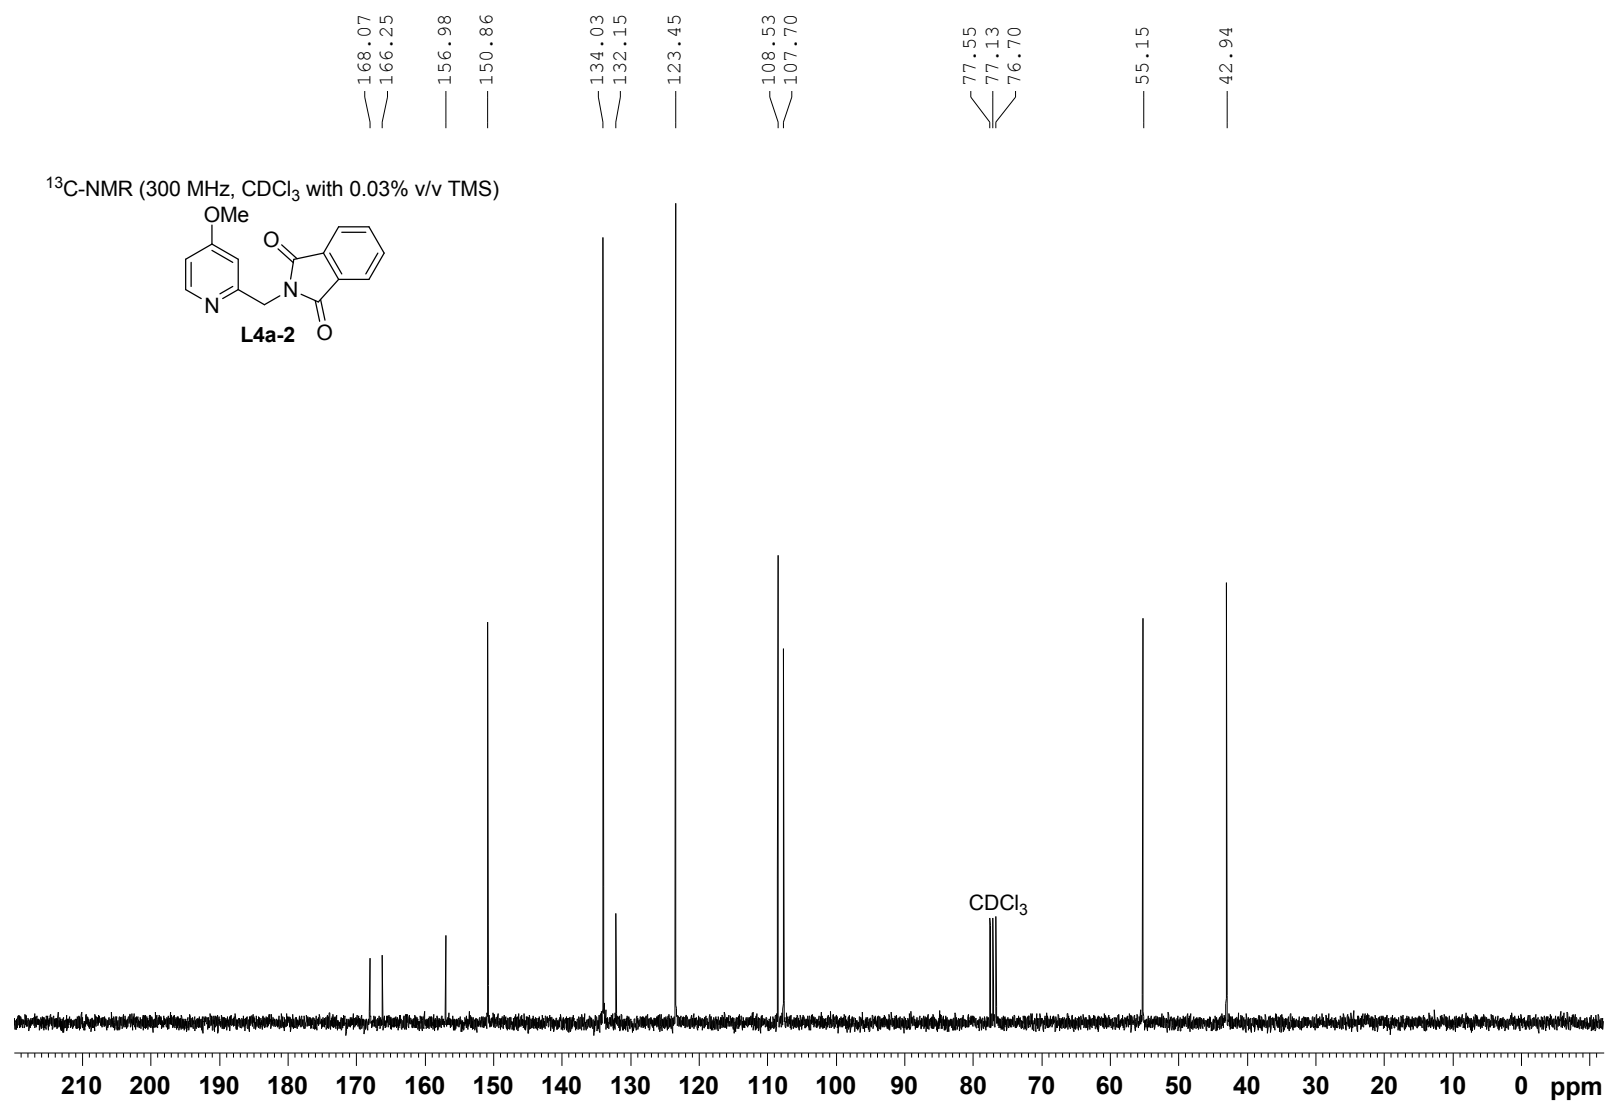

<sup>1</sup>H-NMR (300 MHz, CDCl<sub>3</sub> with 0.03% v/v TMS)

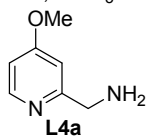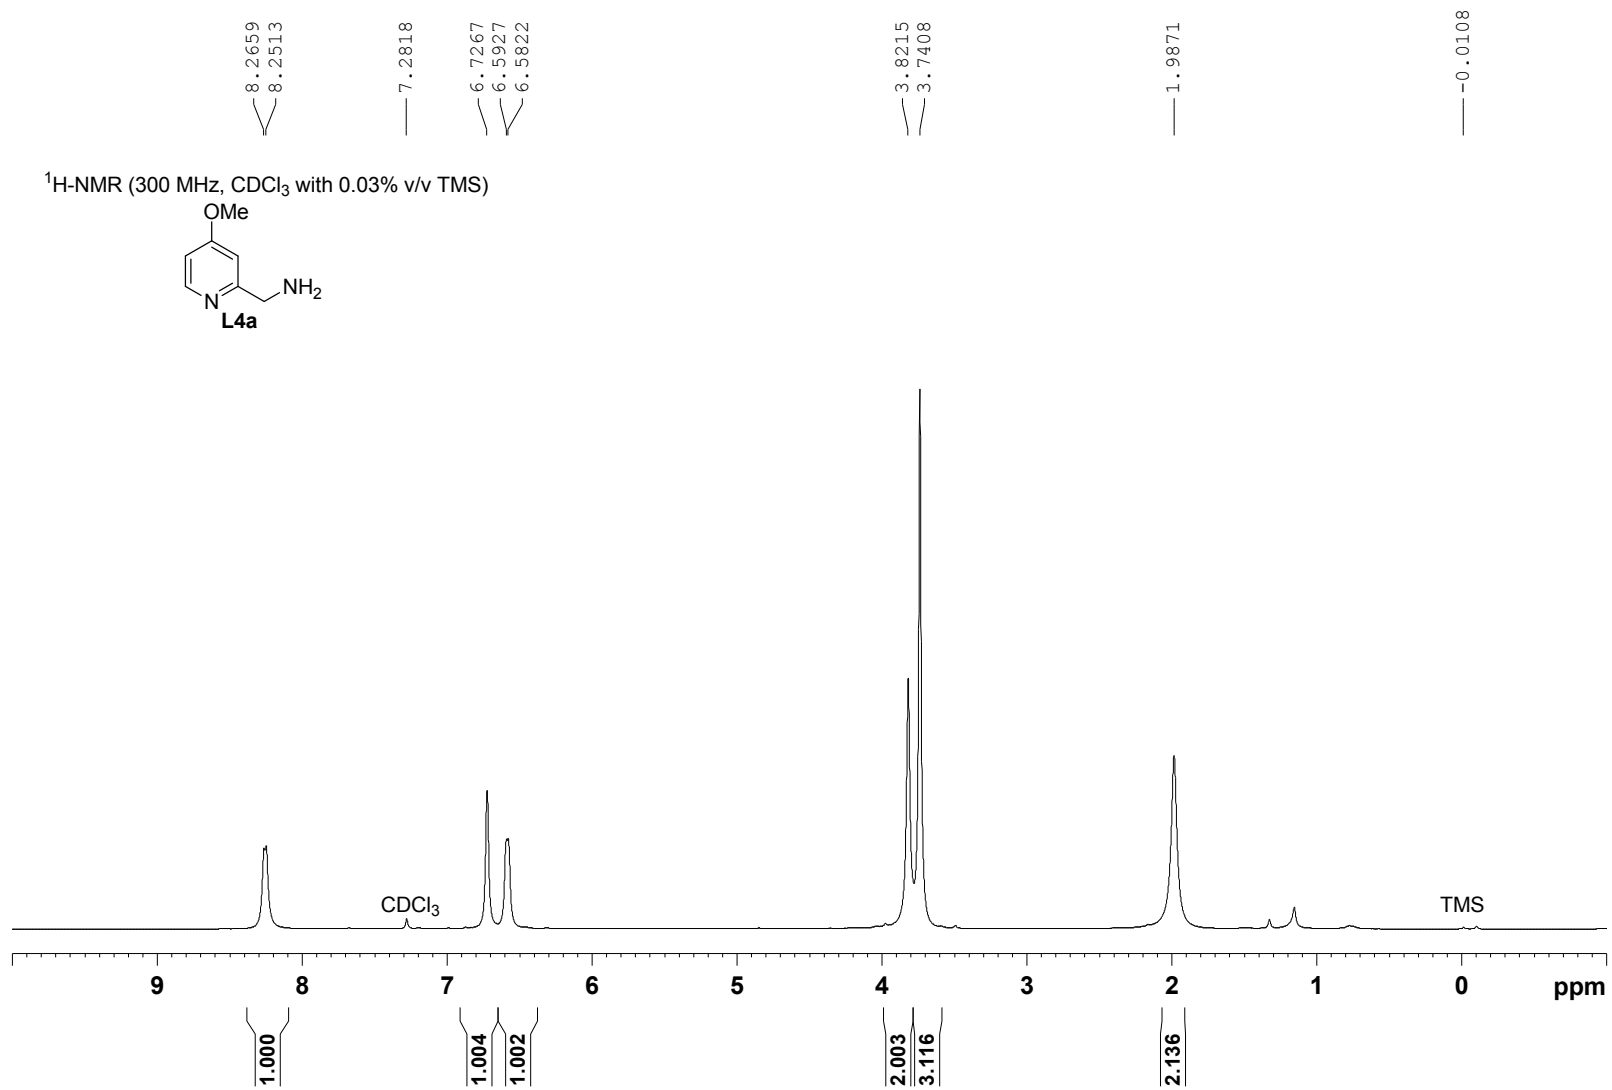

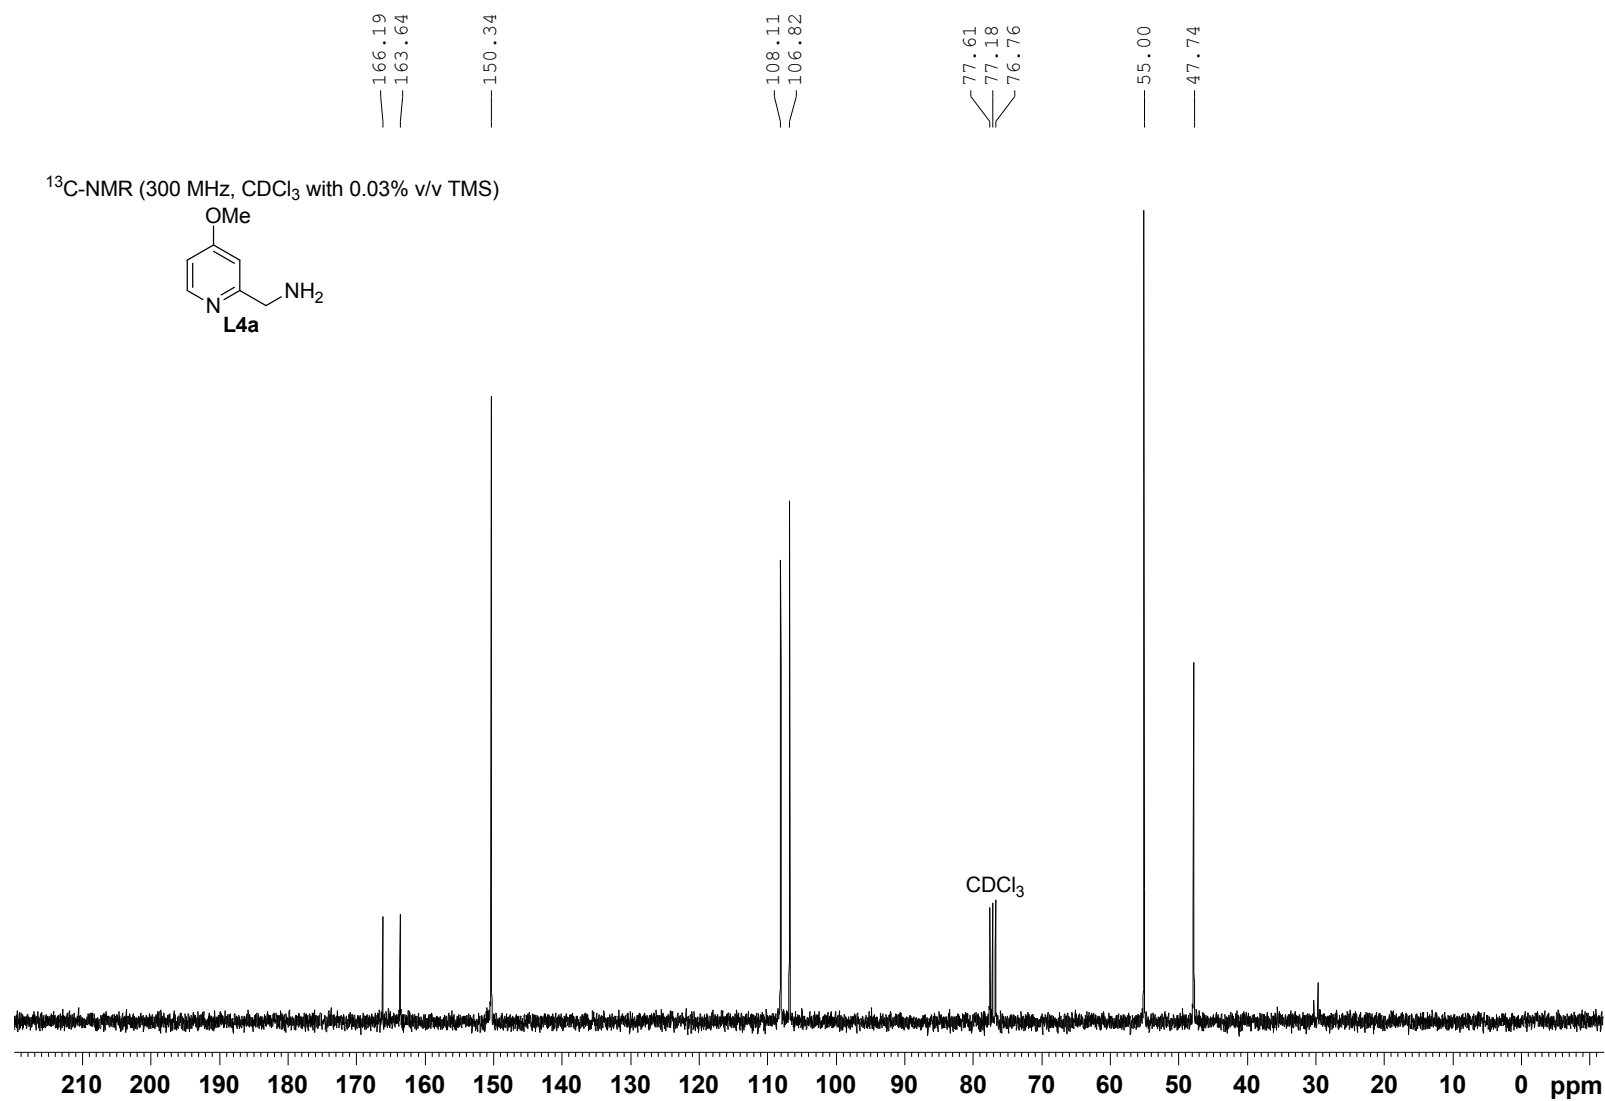



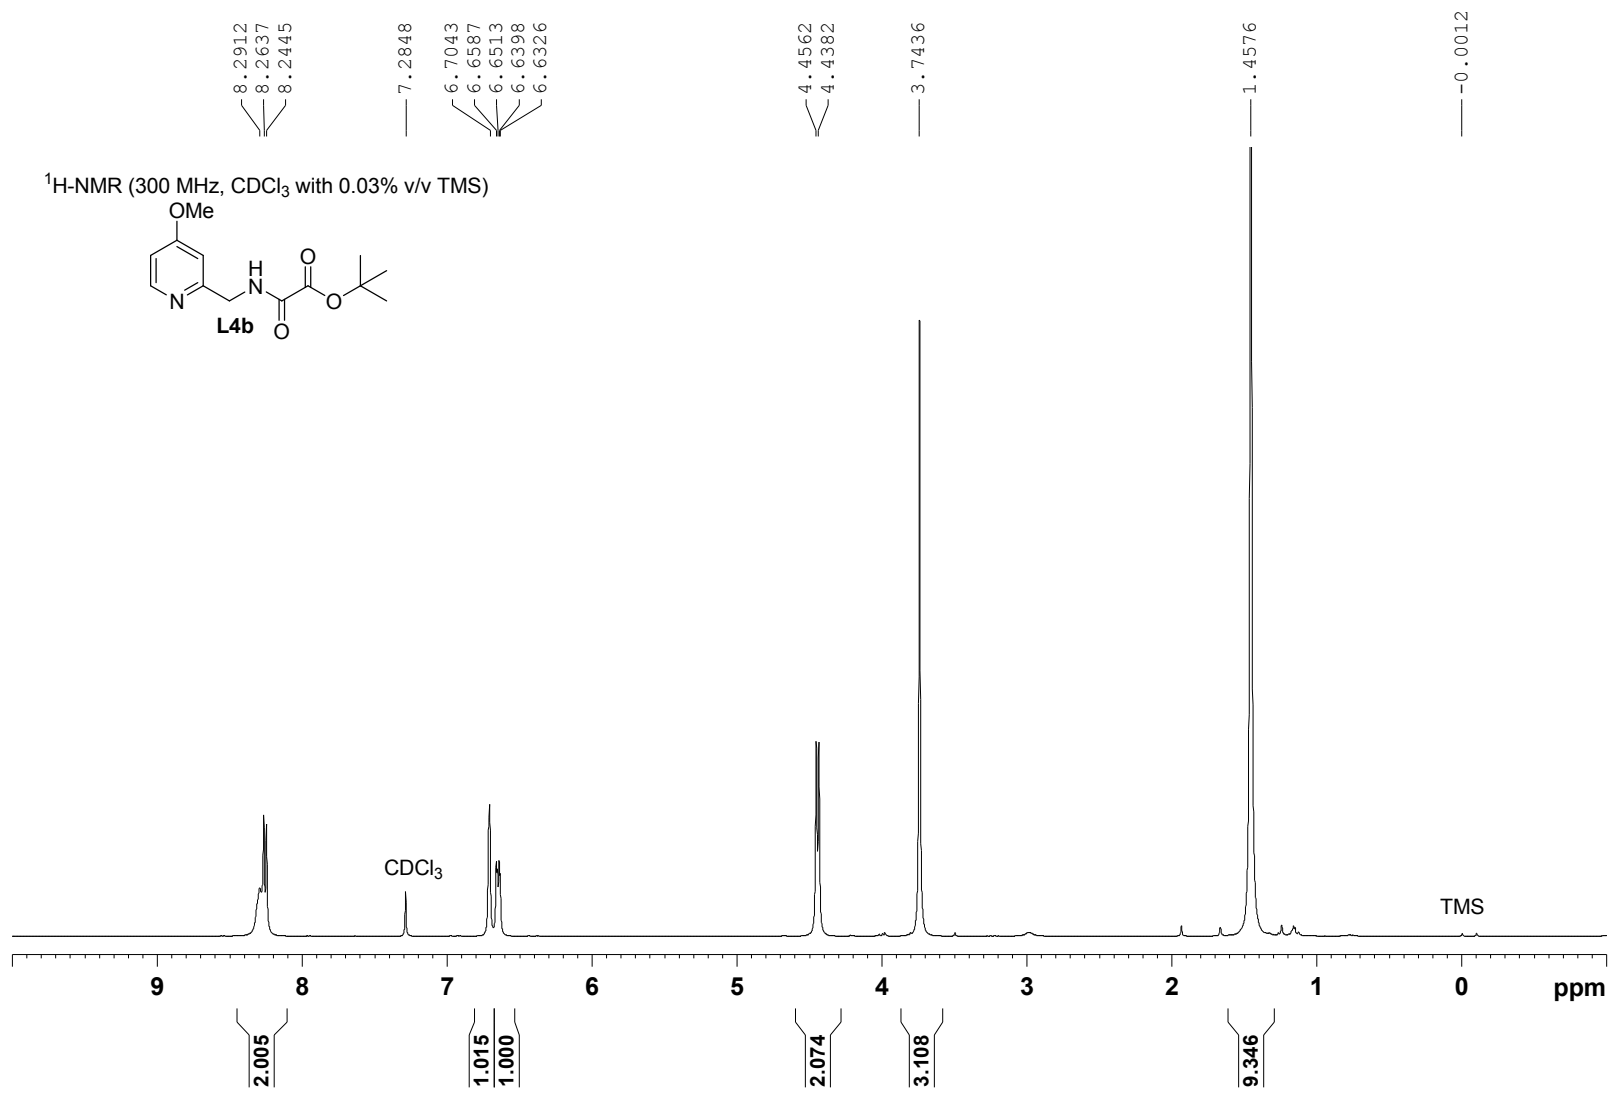

<sup>13</sup>C-NMR (300 MHz, CDCl<sub>3</sub> with 0.03% v/v TMS)

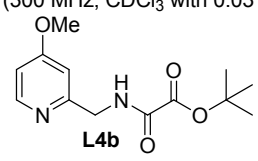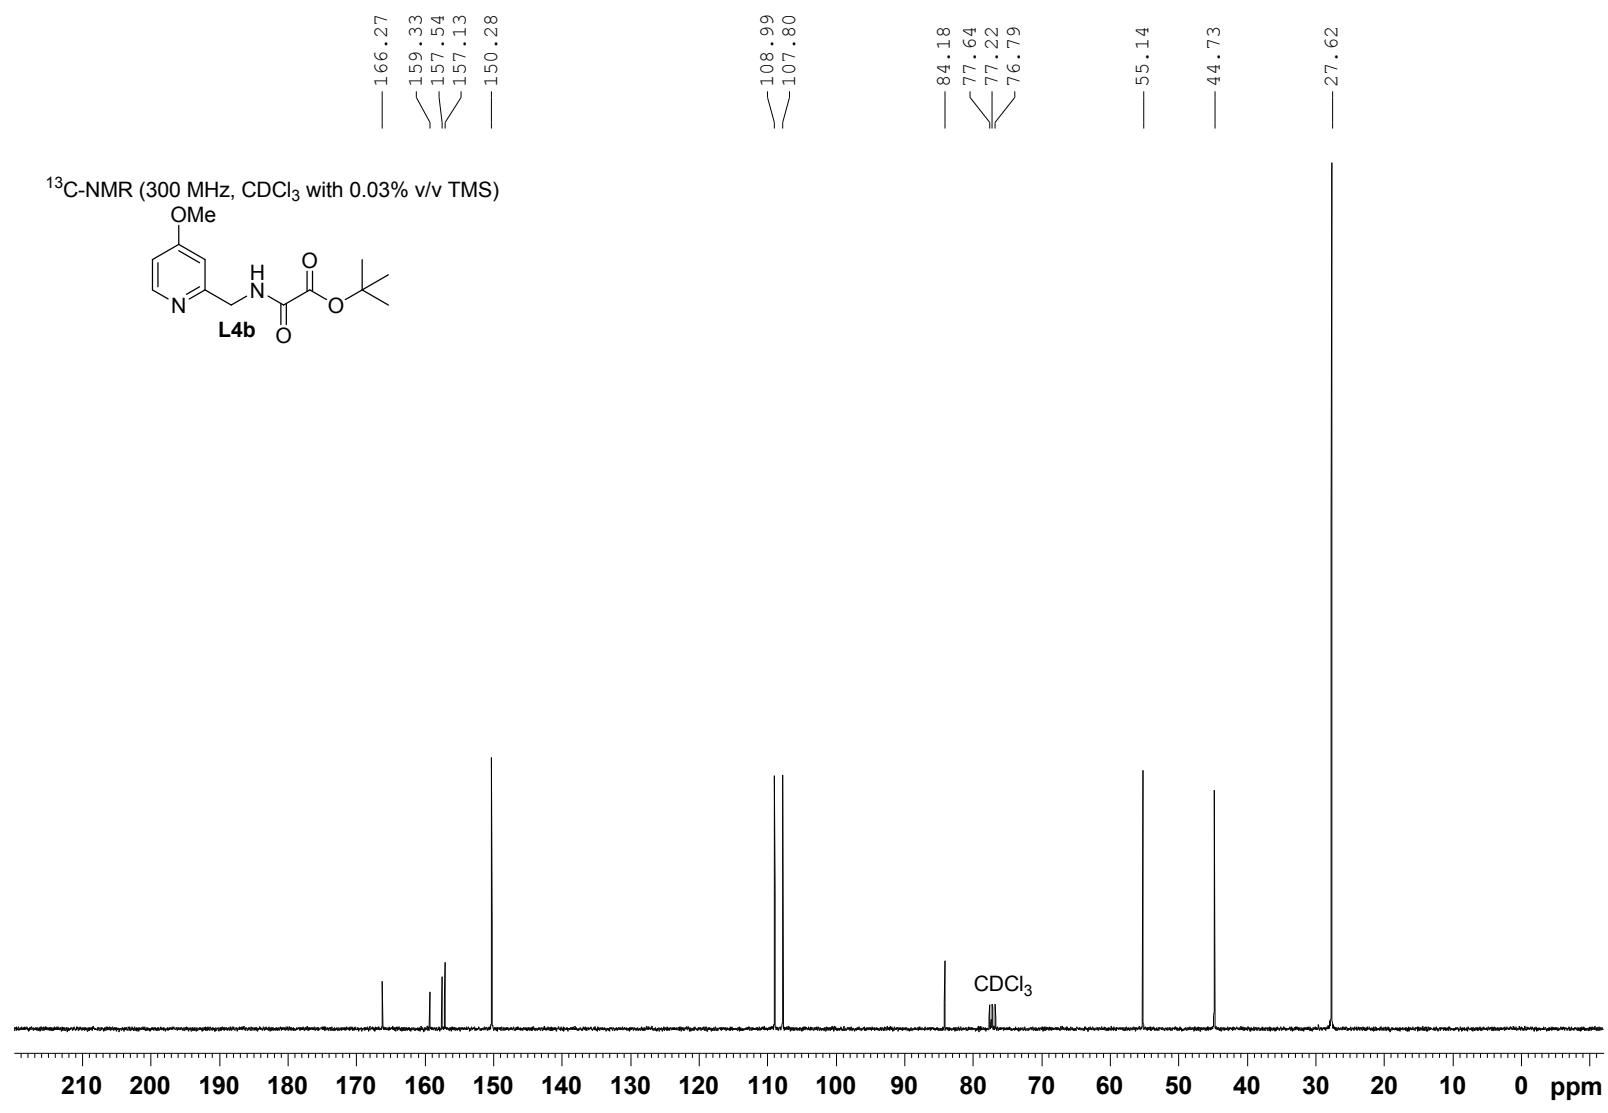

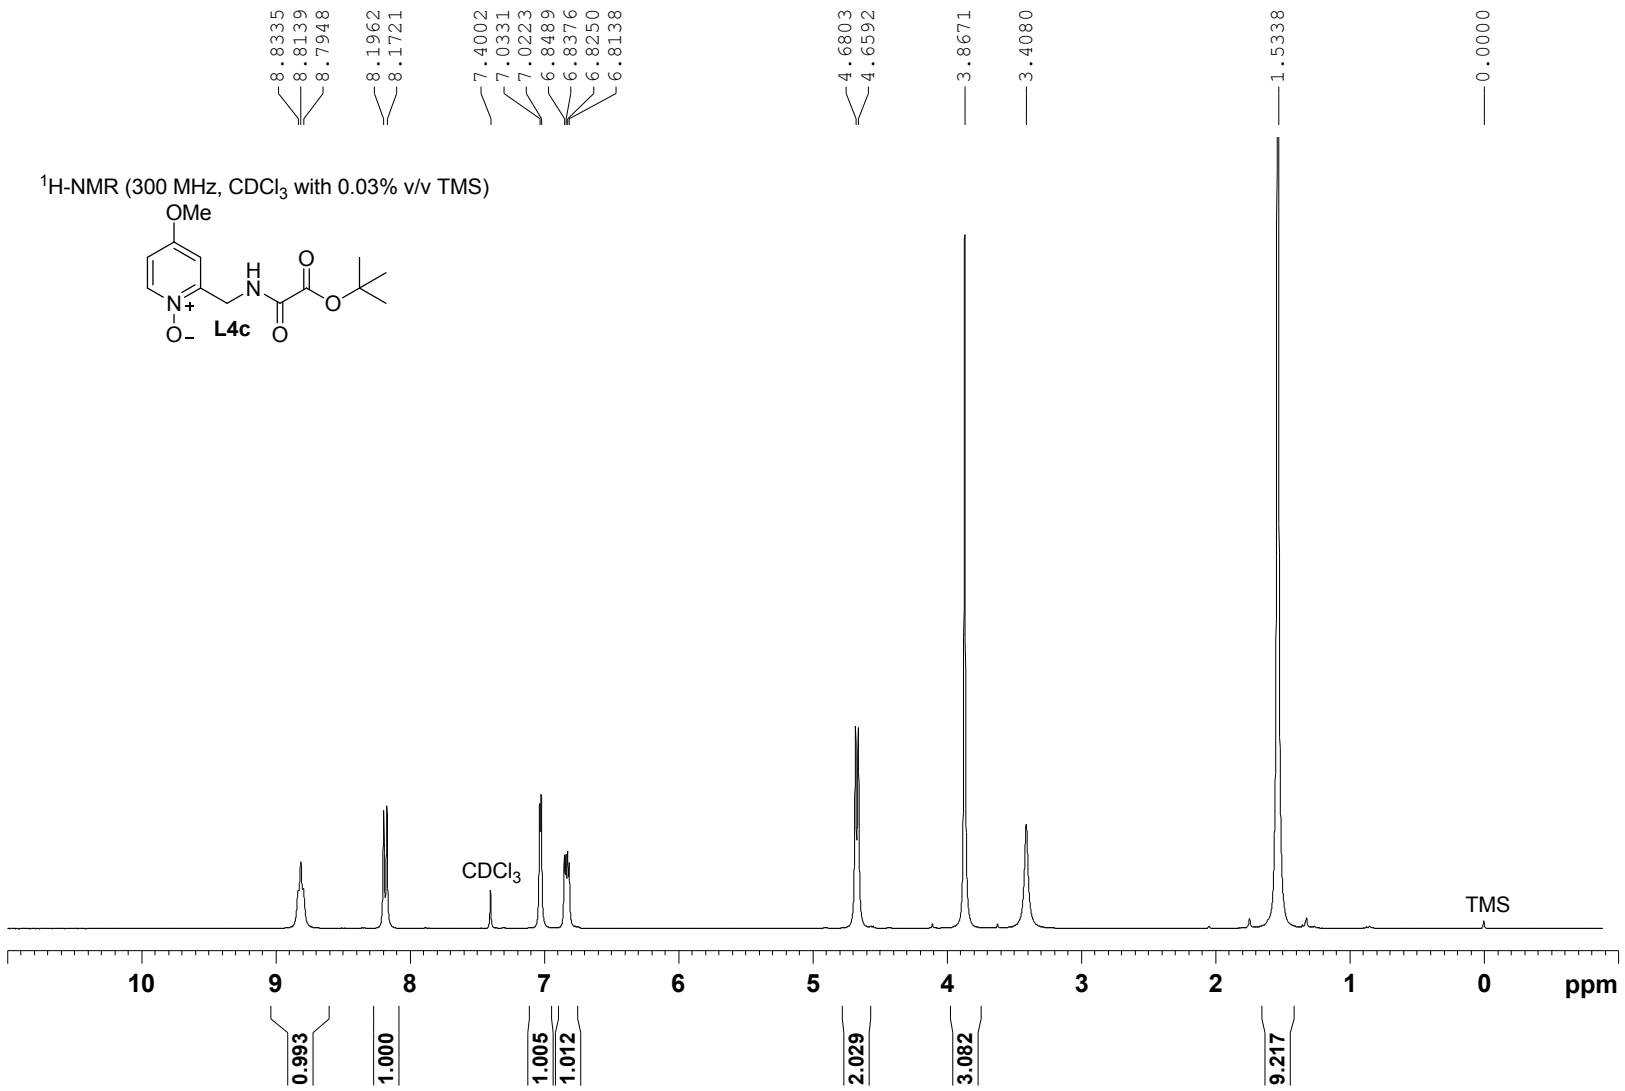

<sup>13</sup>C-NMR (300 MHz, CDCl<sub>3</sub> with 0.03% v/v TMS)

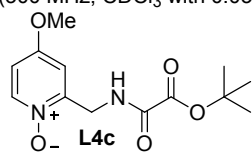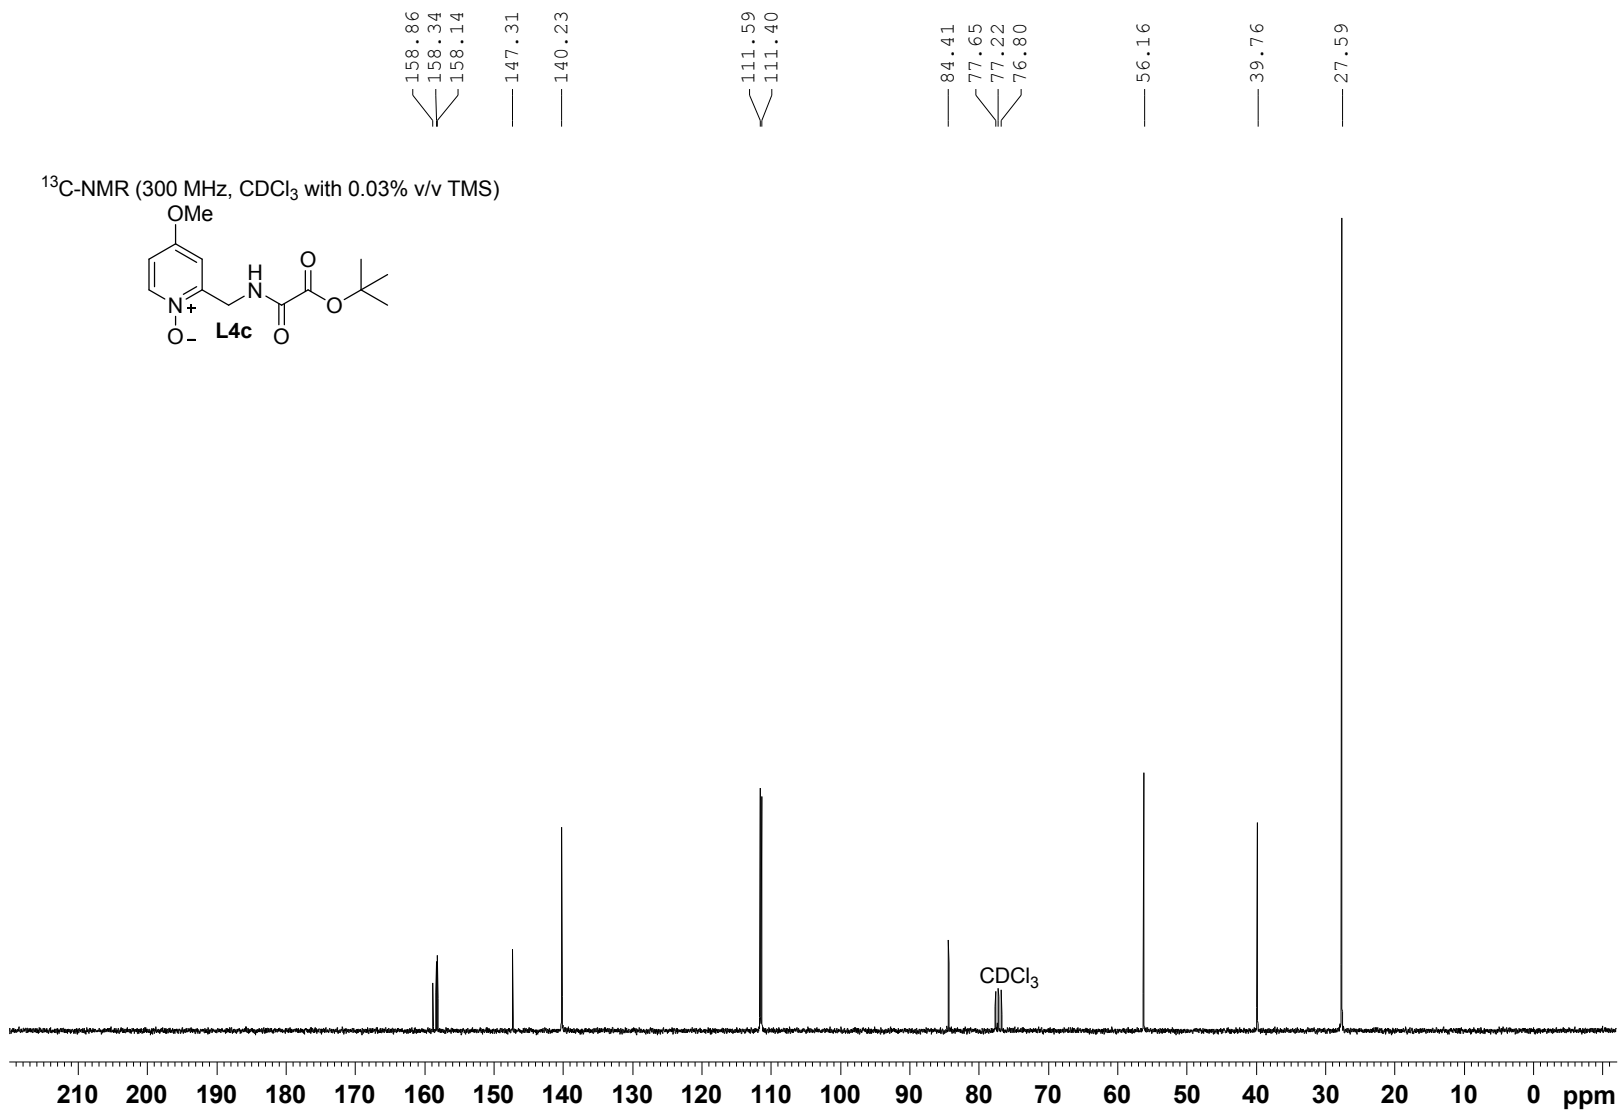

<sup>1</sup>H-NMR (300 MHz, DMSO-d<sub>6</sub> with 0.03% v/v TMS)

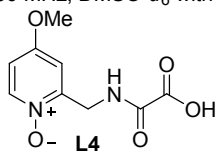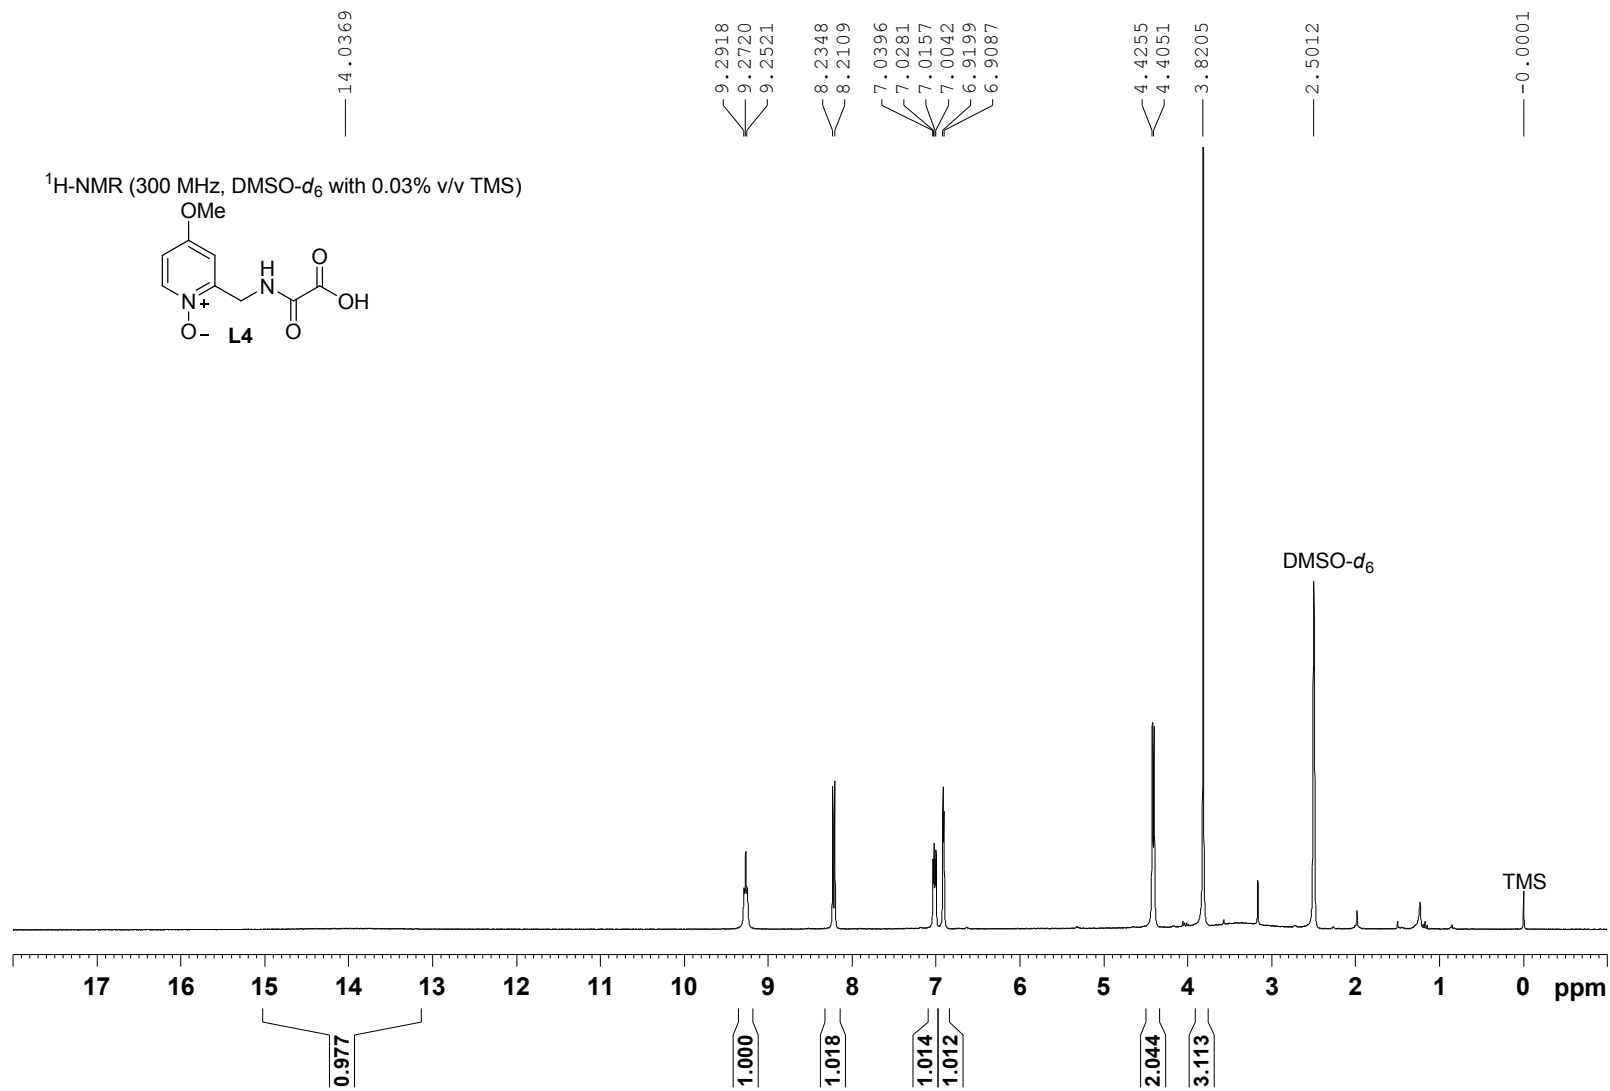

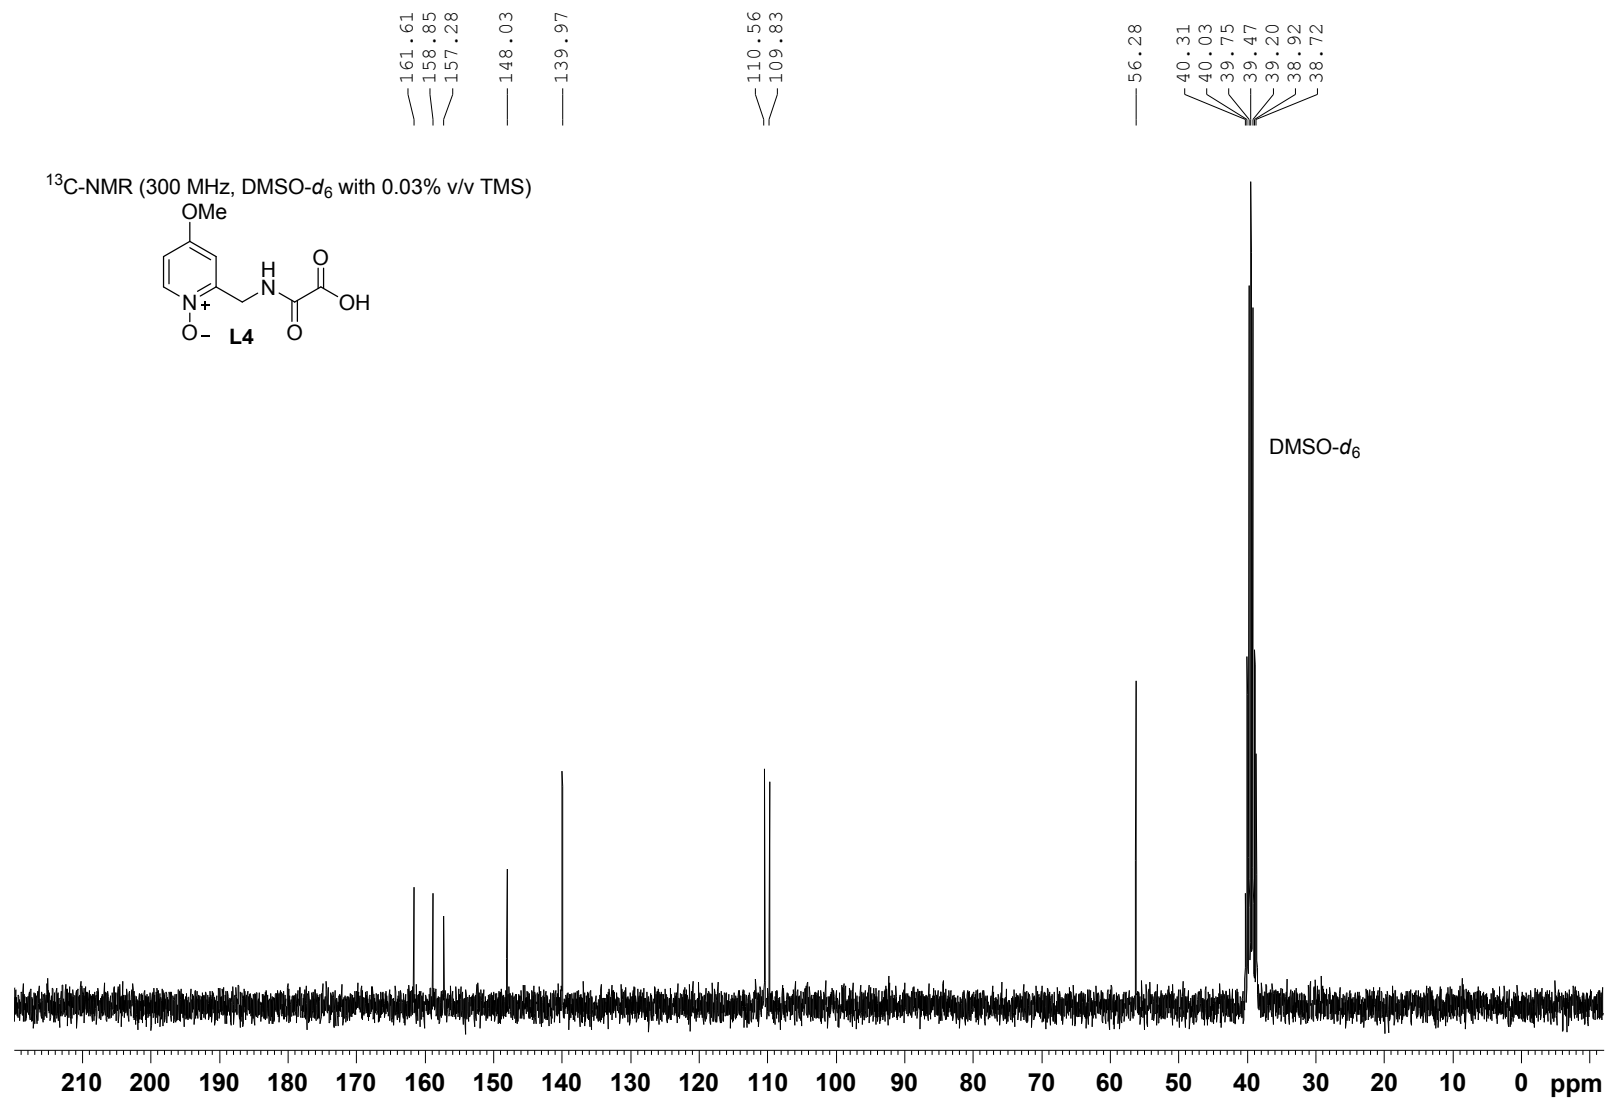

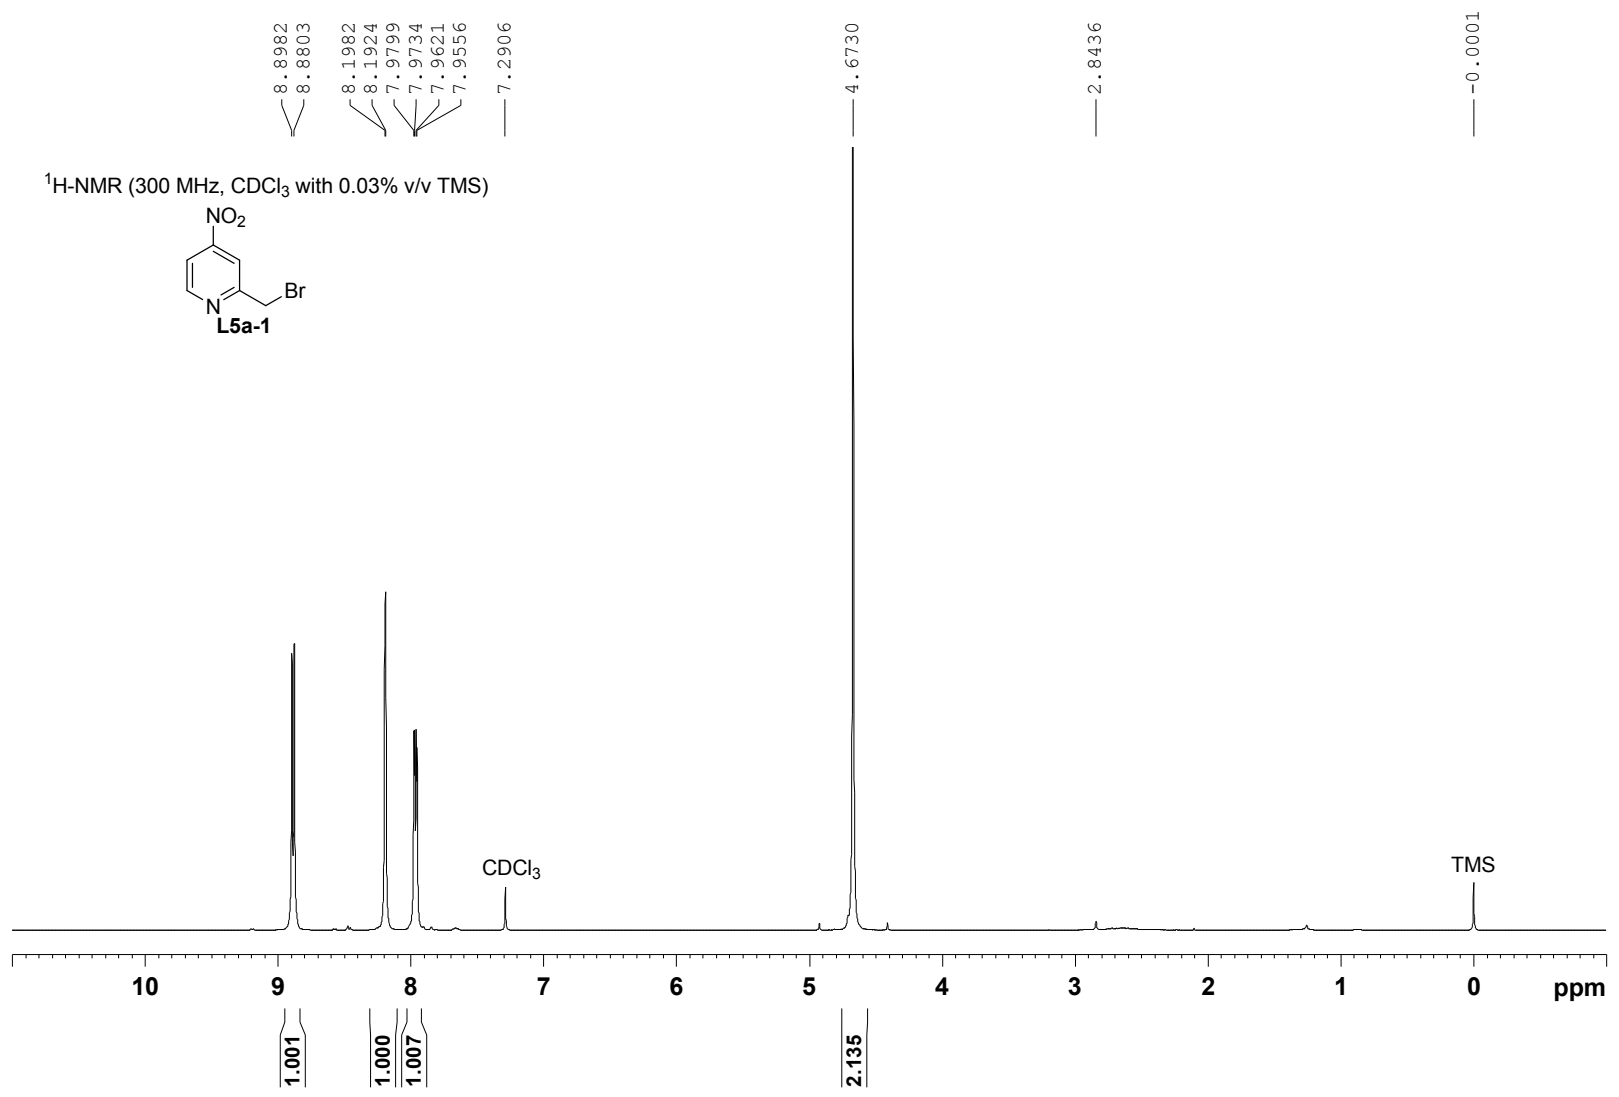

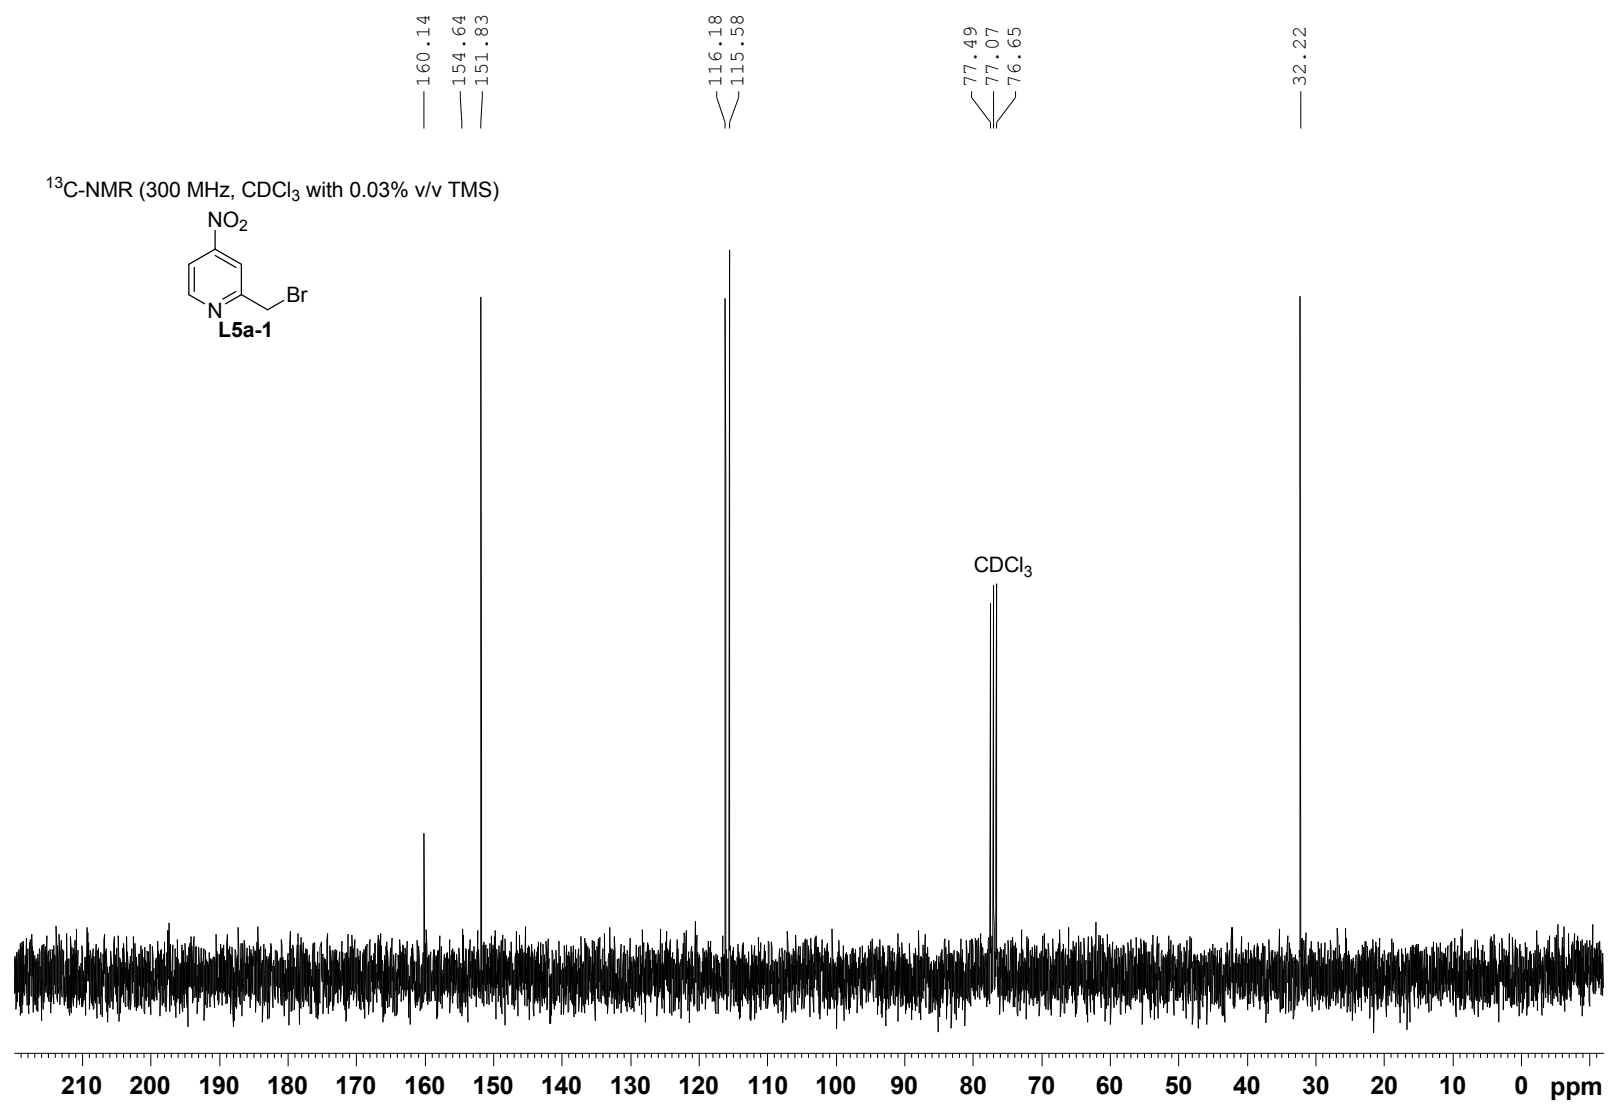



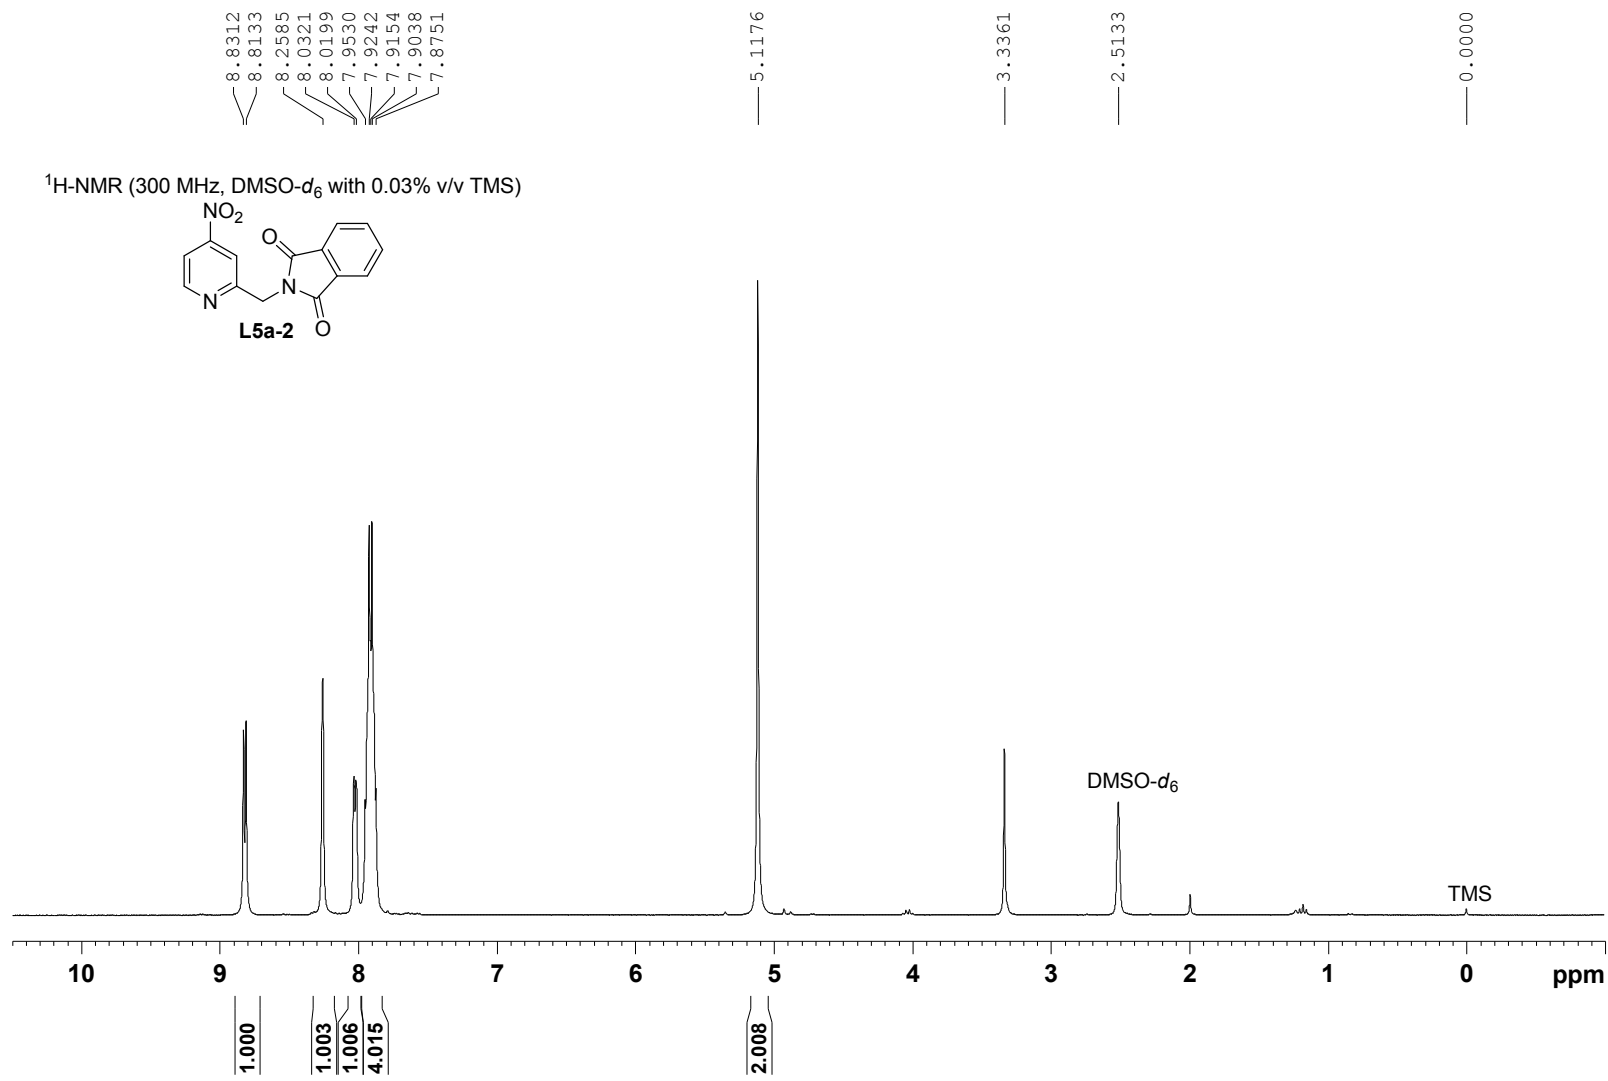

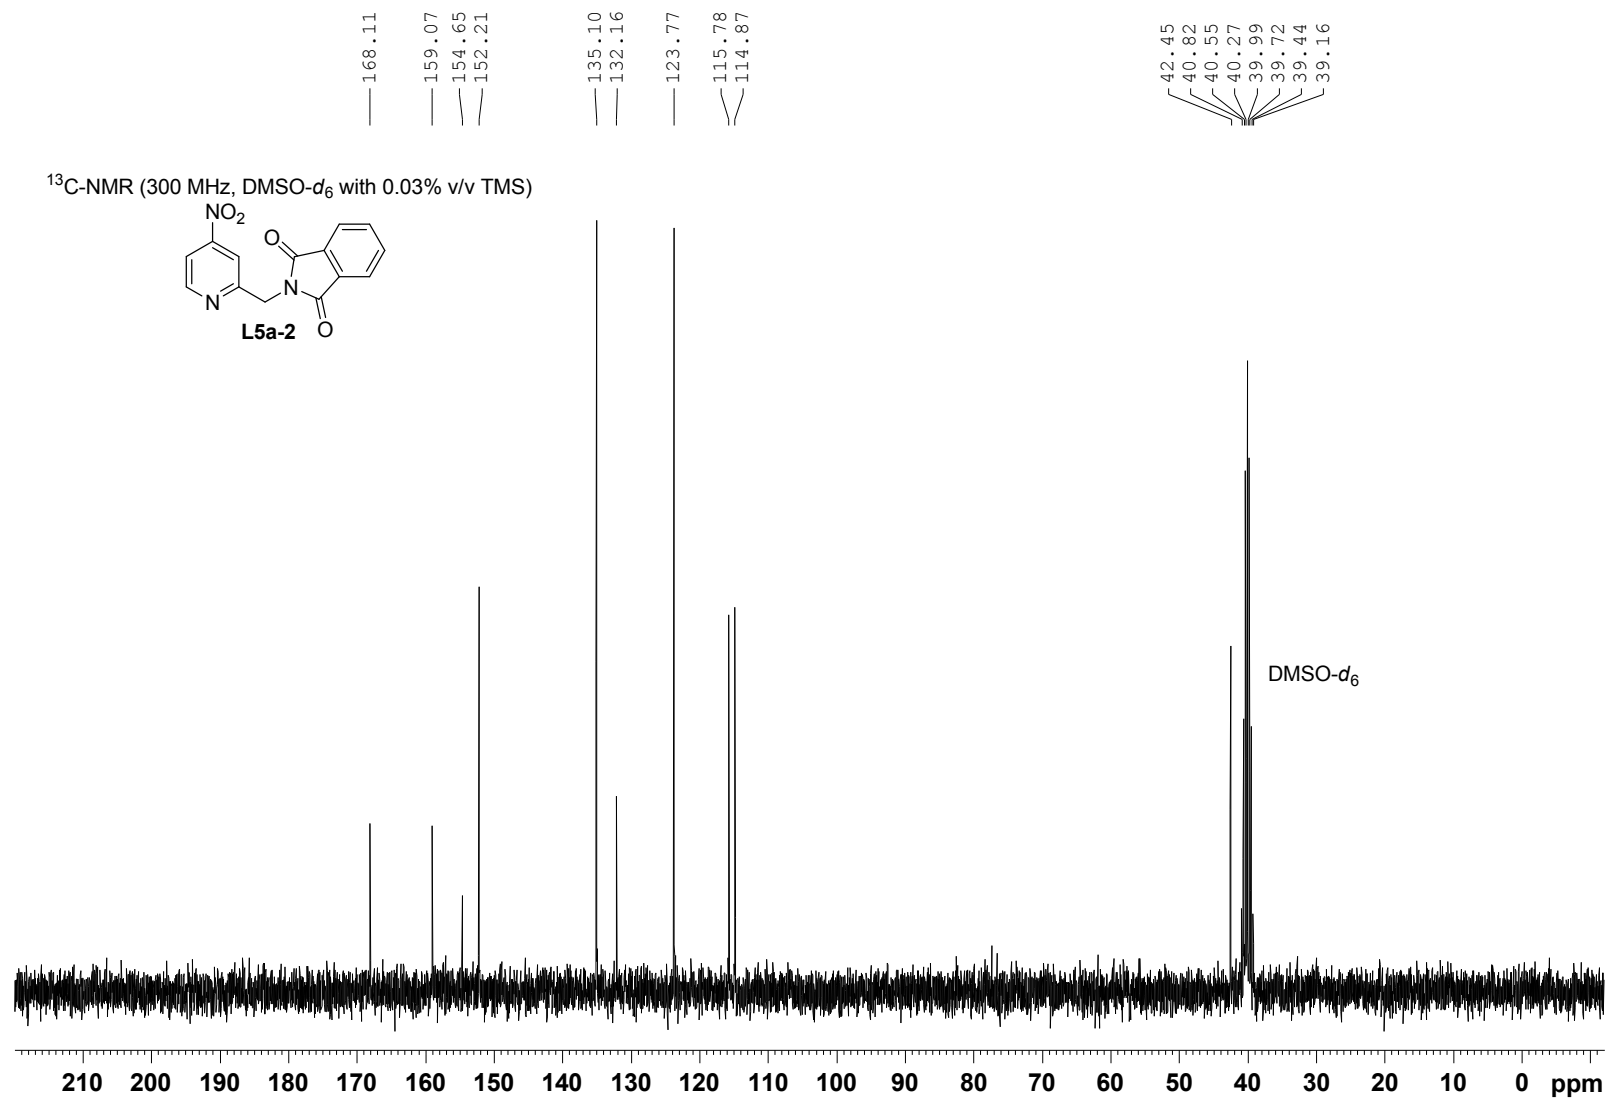

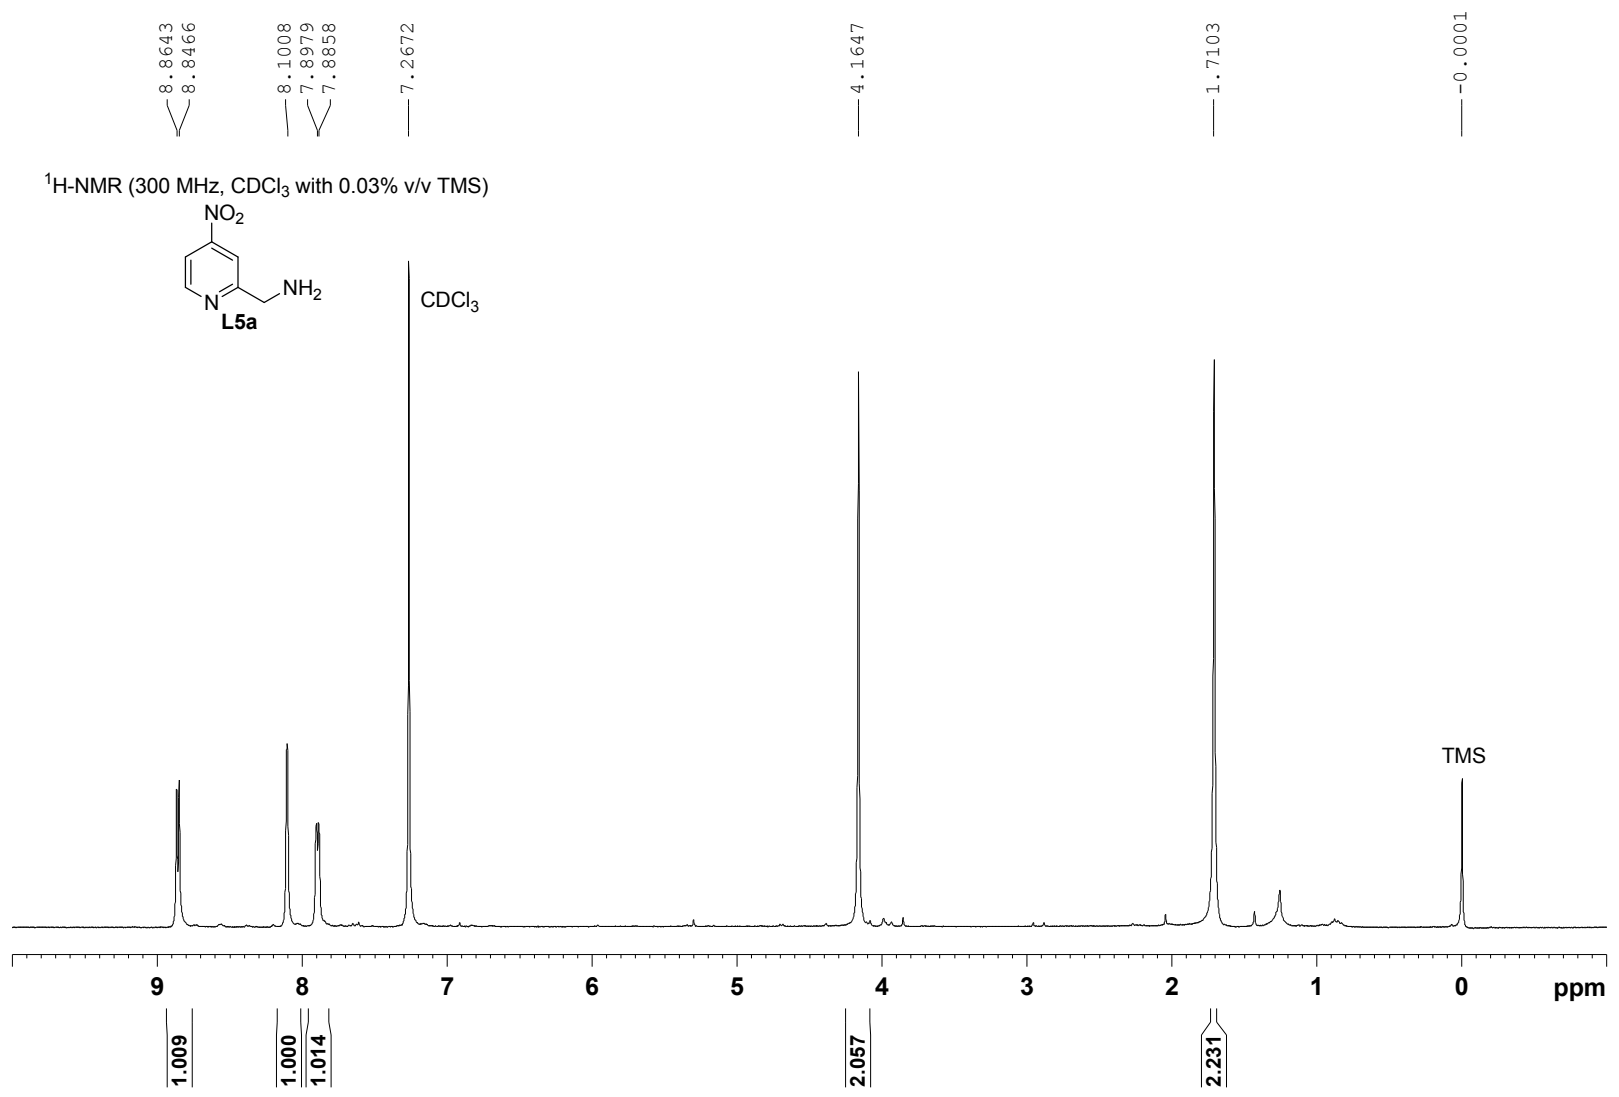

<sup>13</sup>C-NMR (300 MHz, CDCl<sub>3</sub> with 0.03% v/v TMS)

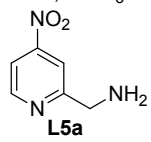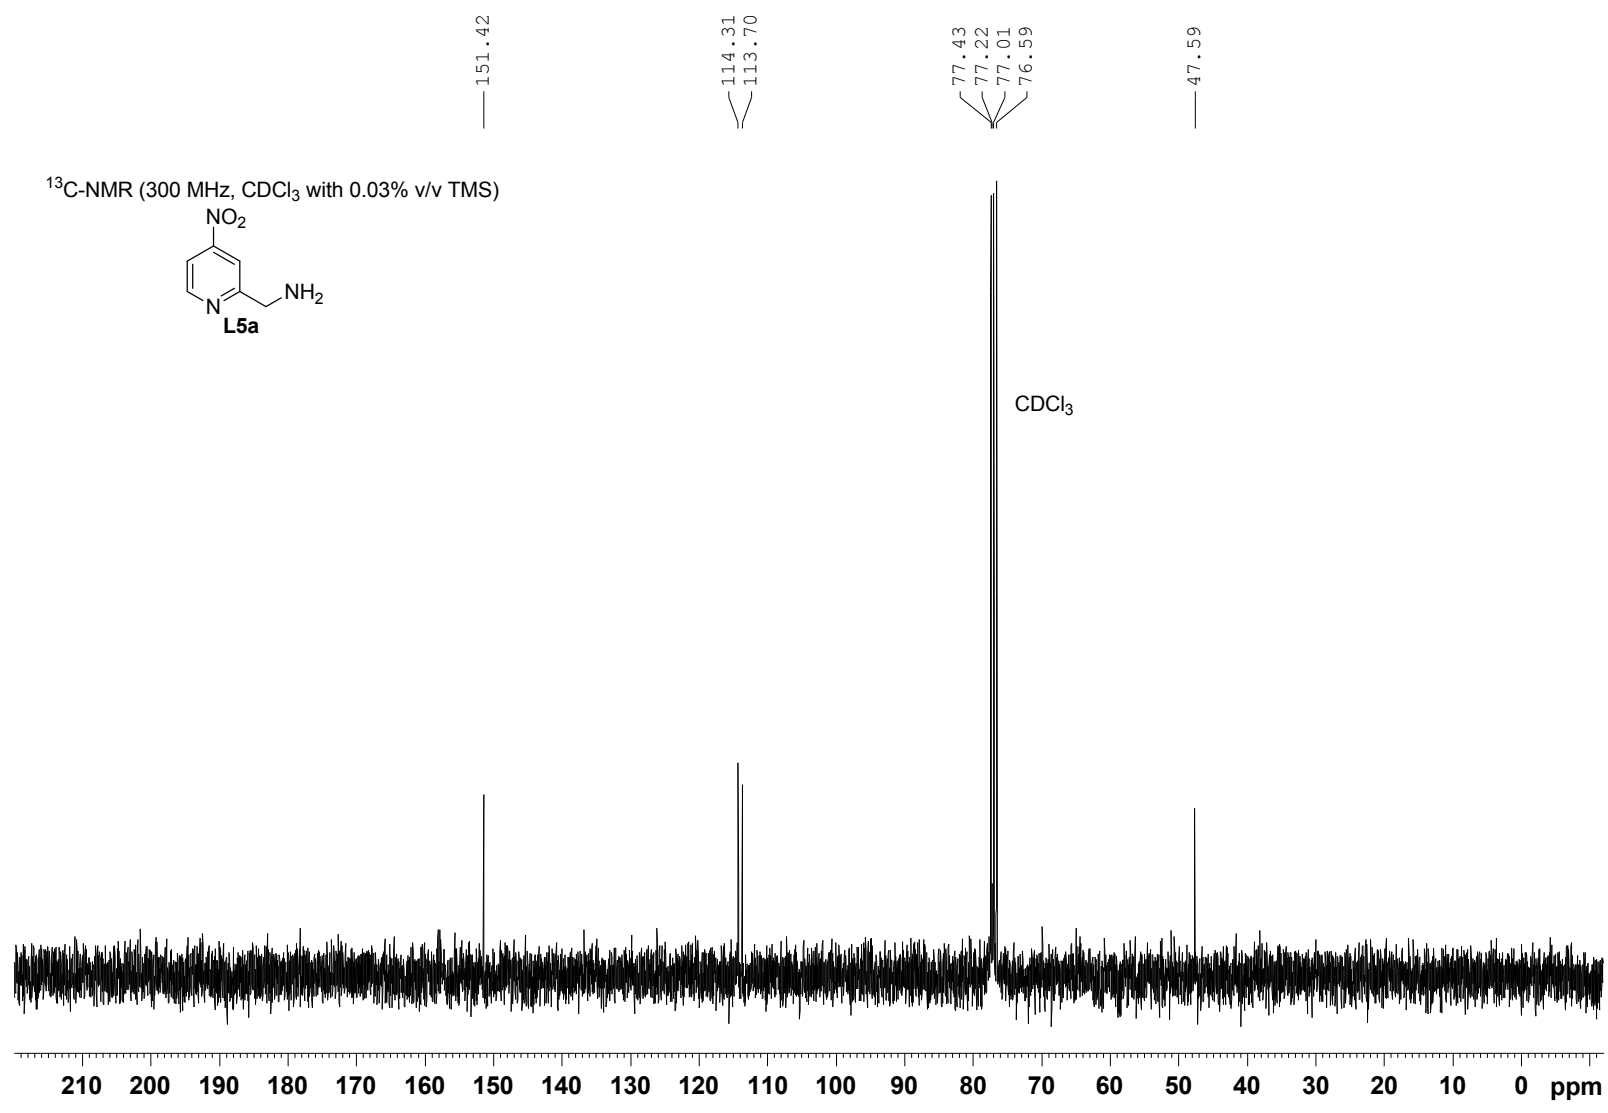

<sup>1</sup>H-NMR (300 MHz, CDCl<sub>3</sub> with 0.03% v/v TMS)

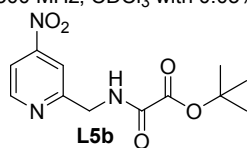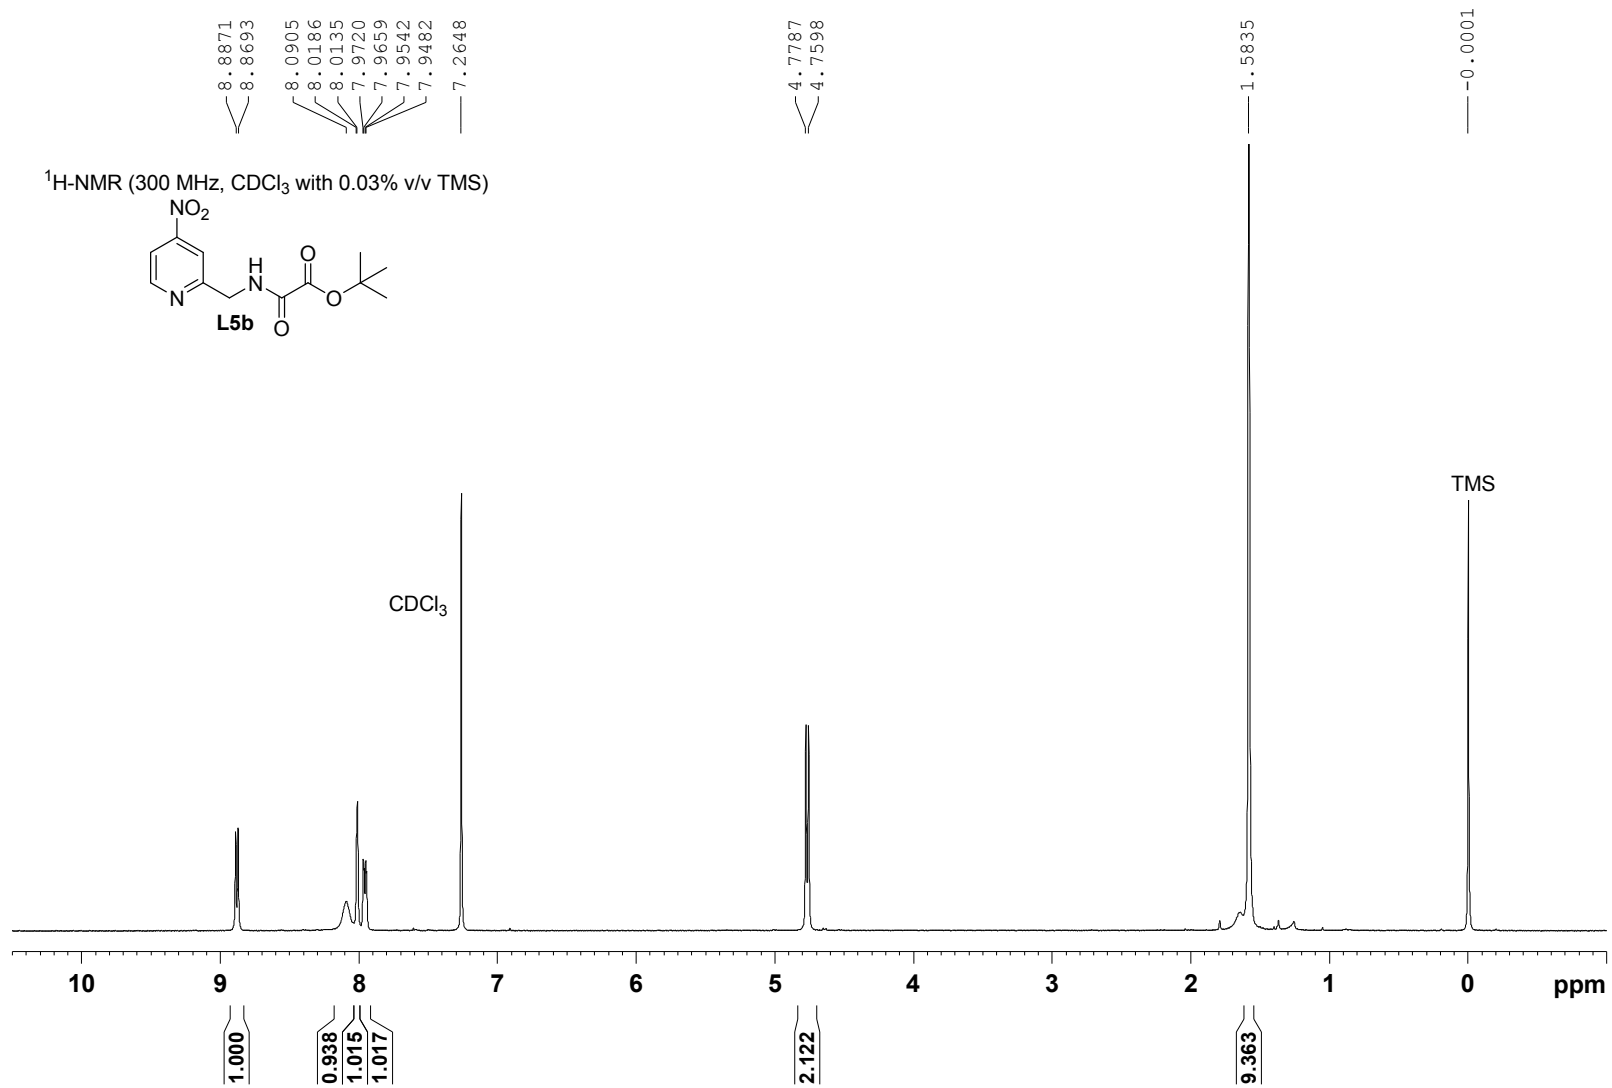

<sup>13</sup>C-NMR (300 MHz, CDCl<sub>3</sub> with 0.03% v/v TMS)

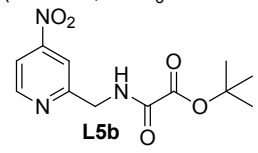

159.49  
159.15  
157.89  
154.36  
151.59

115.17  
114.64

84.78  
77.58  
77.15  
76.72

44.78

27.64

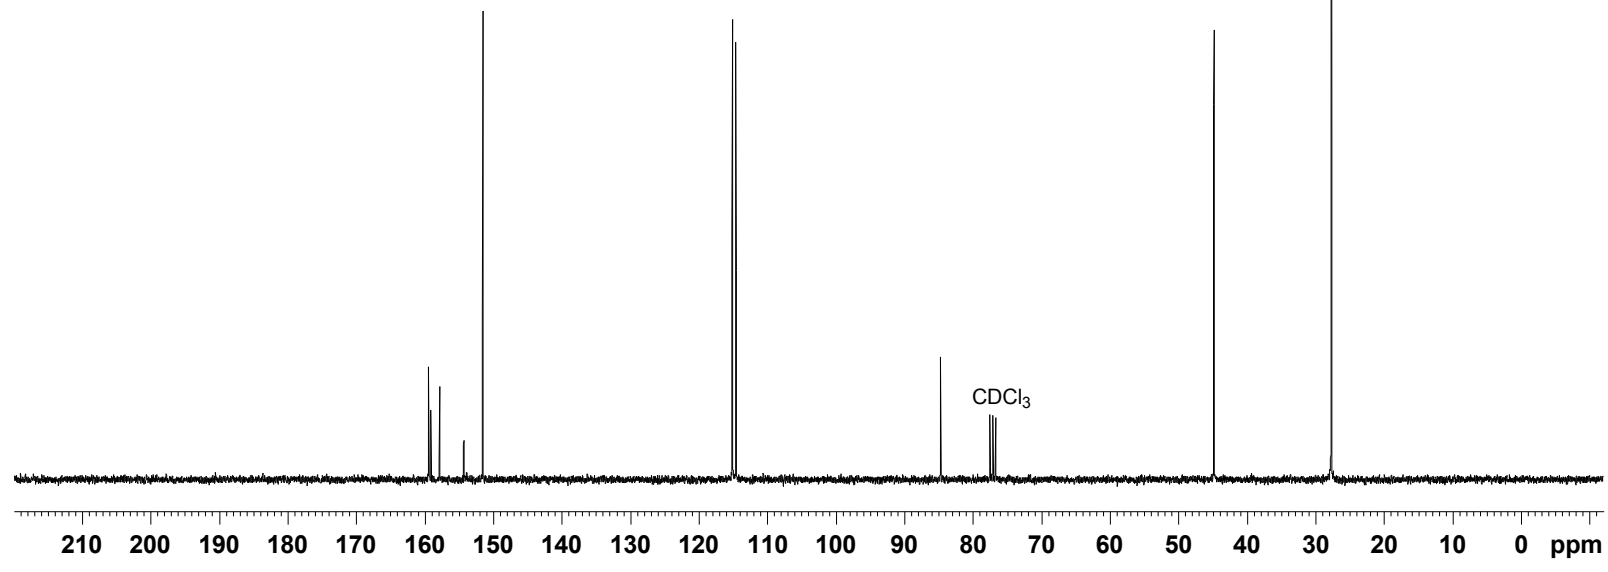

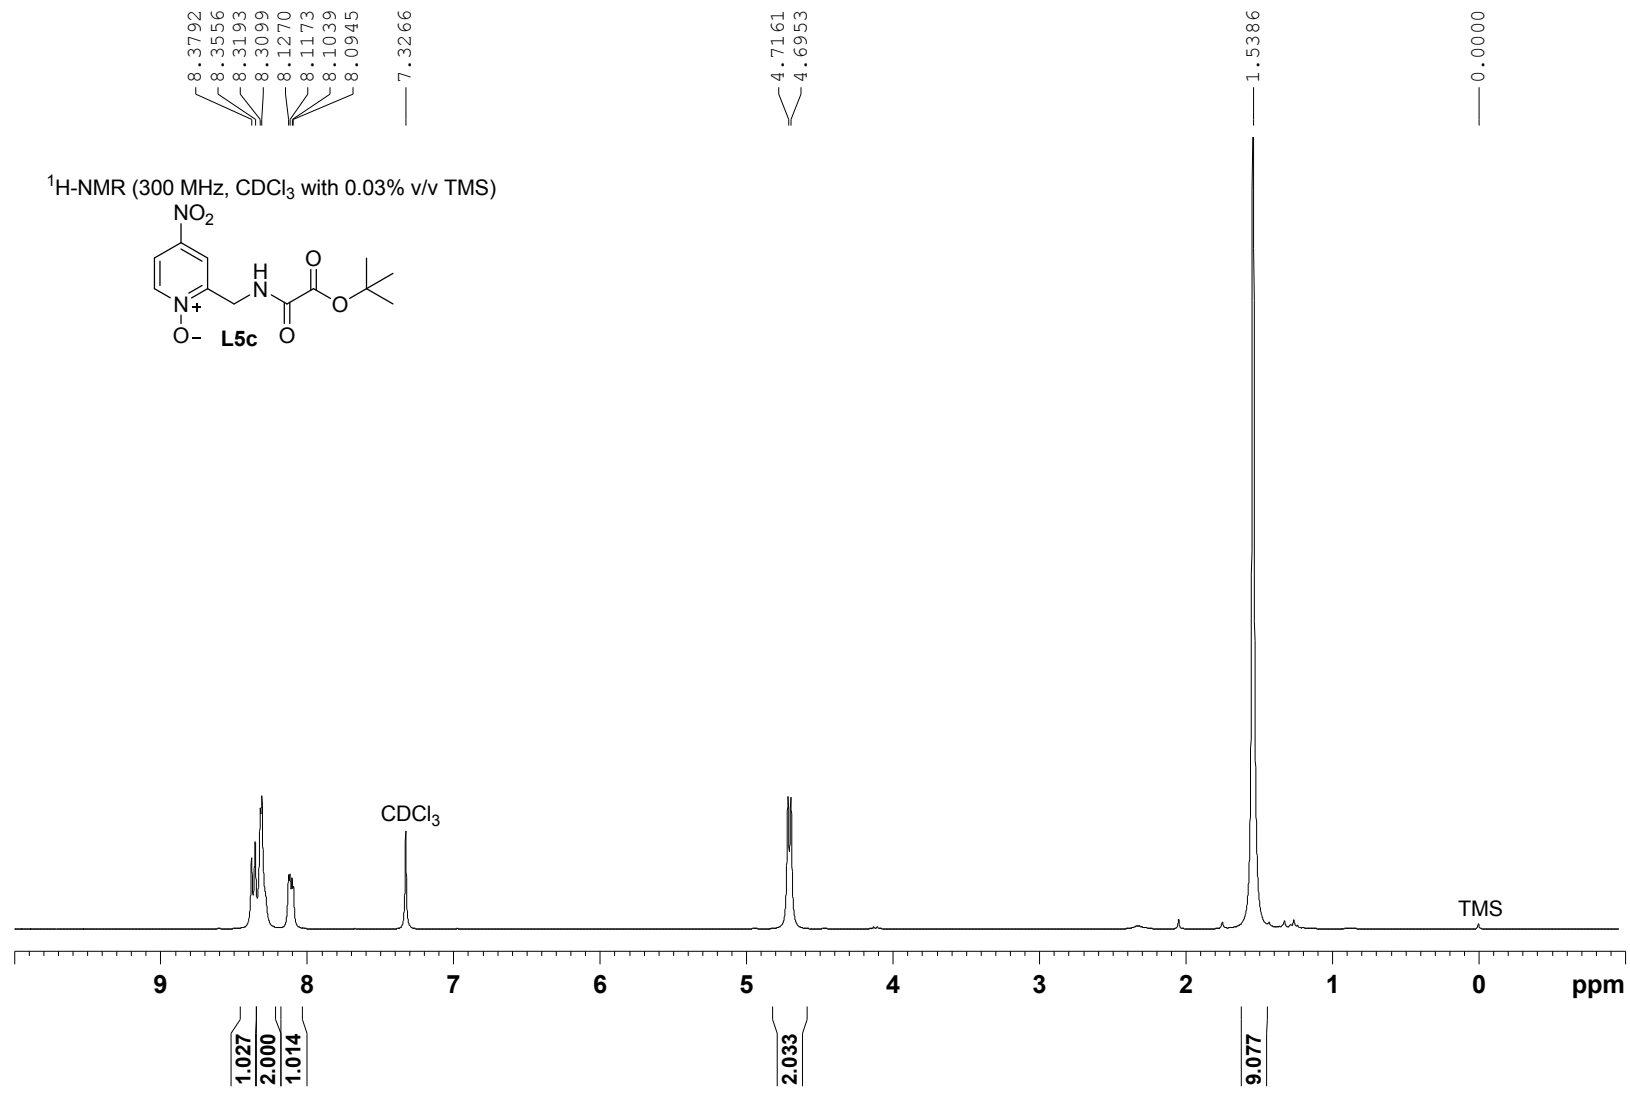

<sup>13</sup>C-NMR (300 MHz, CDCl<sub>3</sub> with 0.03% v/v TMS)

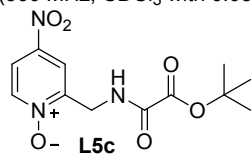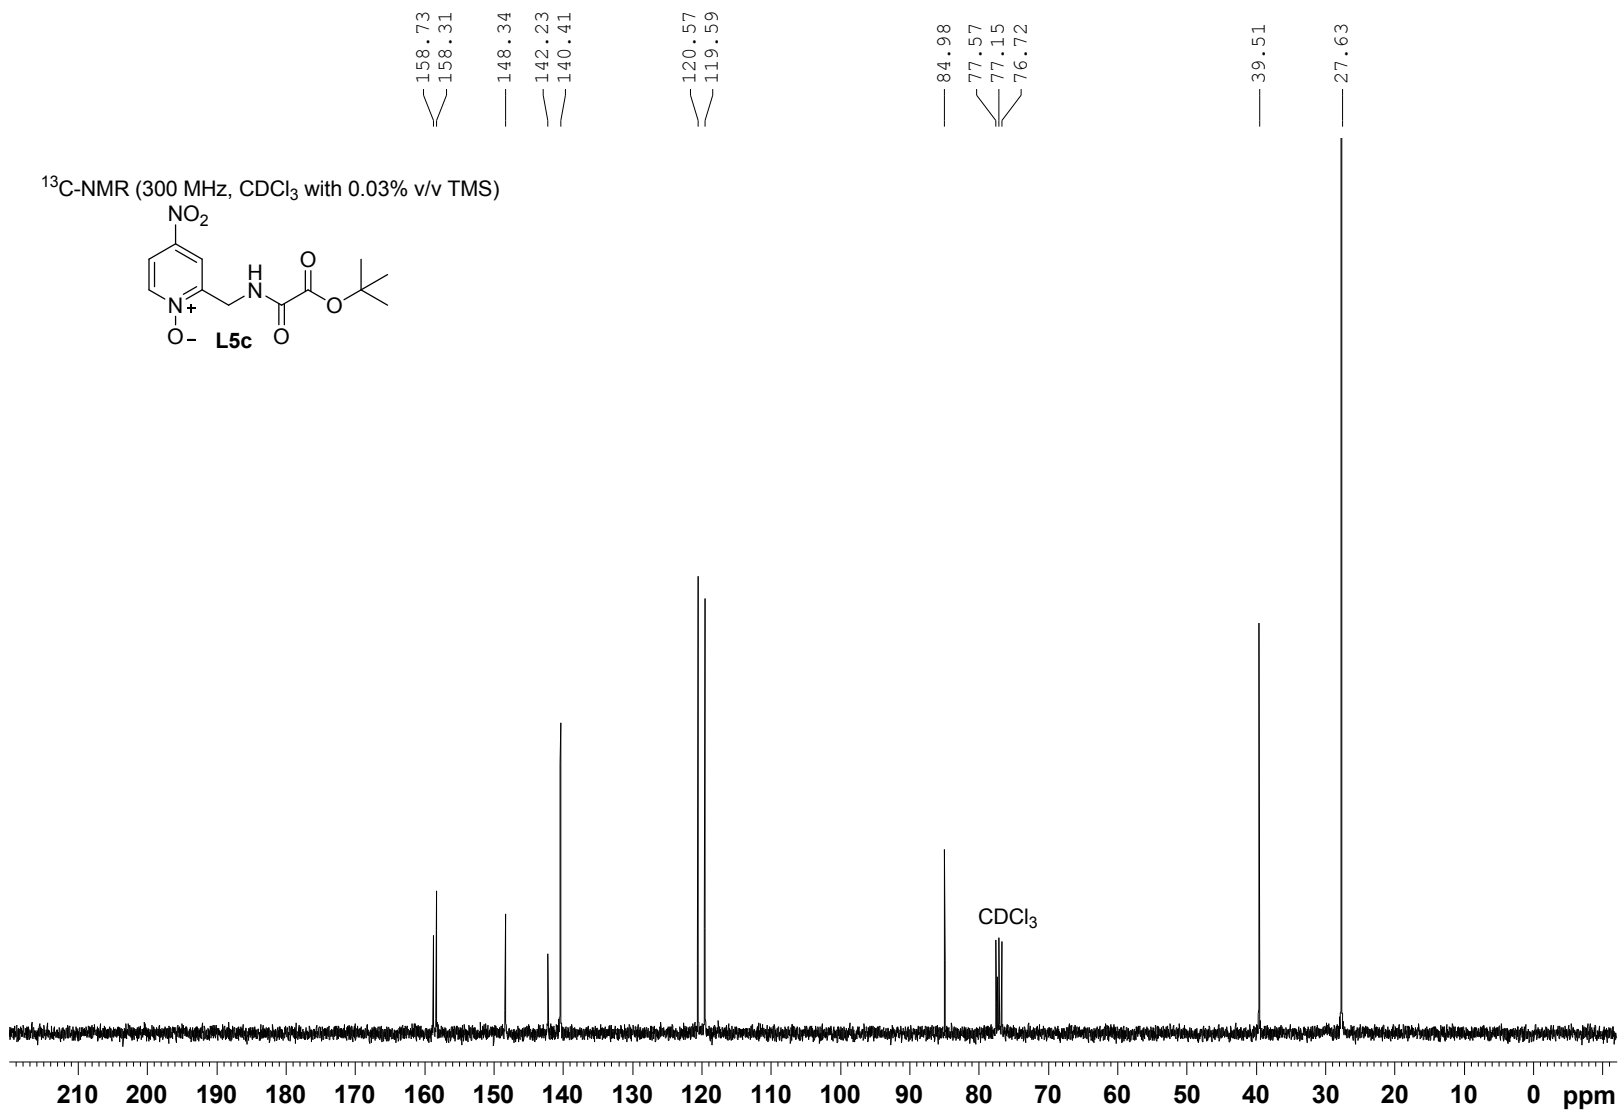



<sup>1</sup>H-NMR (300 MHz, DMSO-*d*<sub>6</sub> with 0.03% v/v TMS)

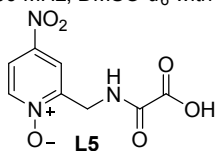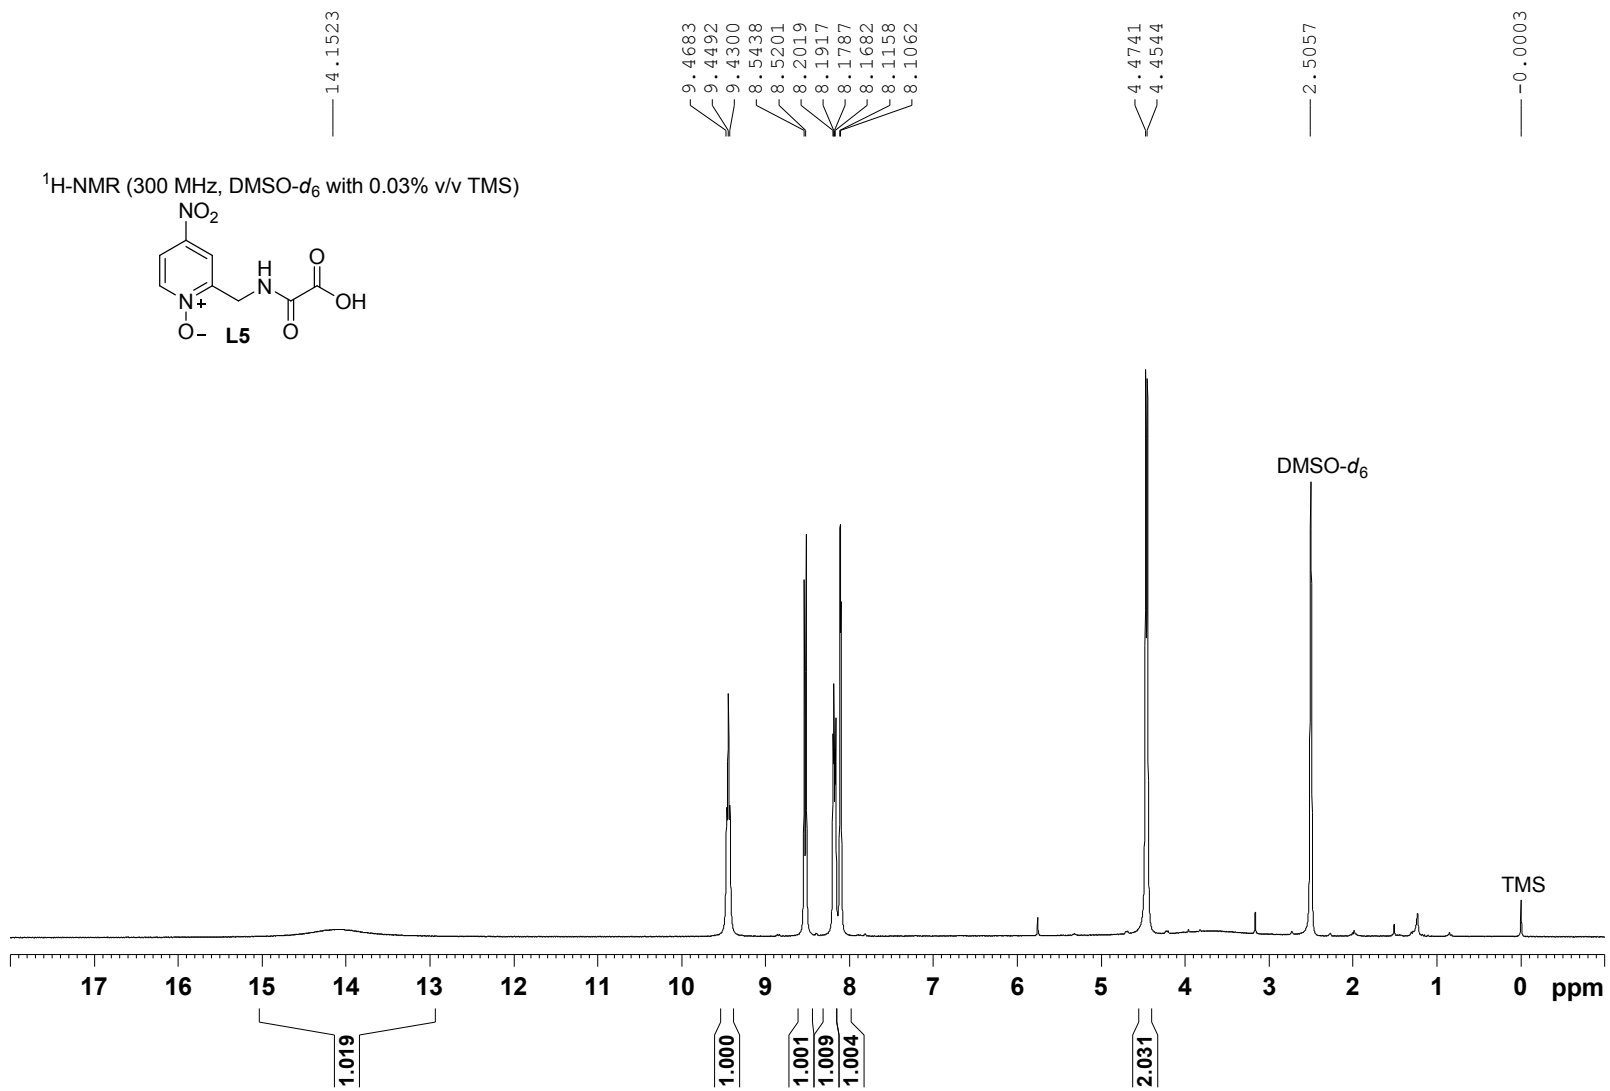

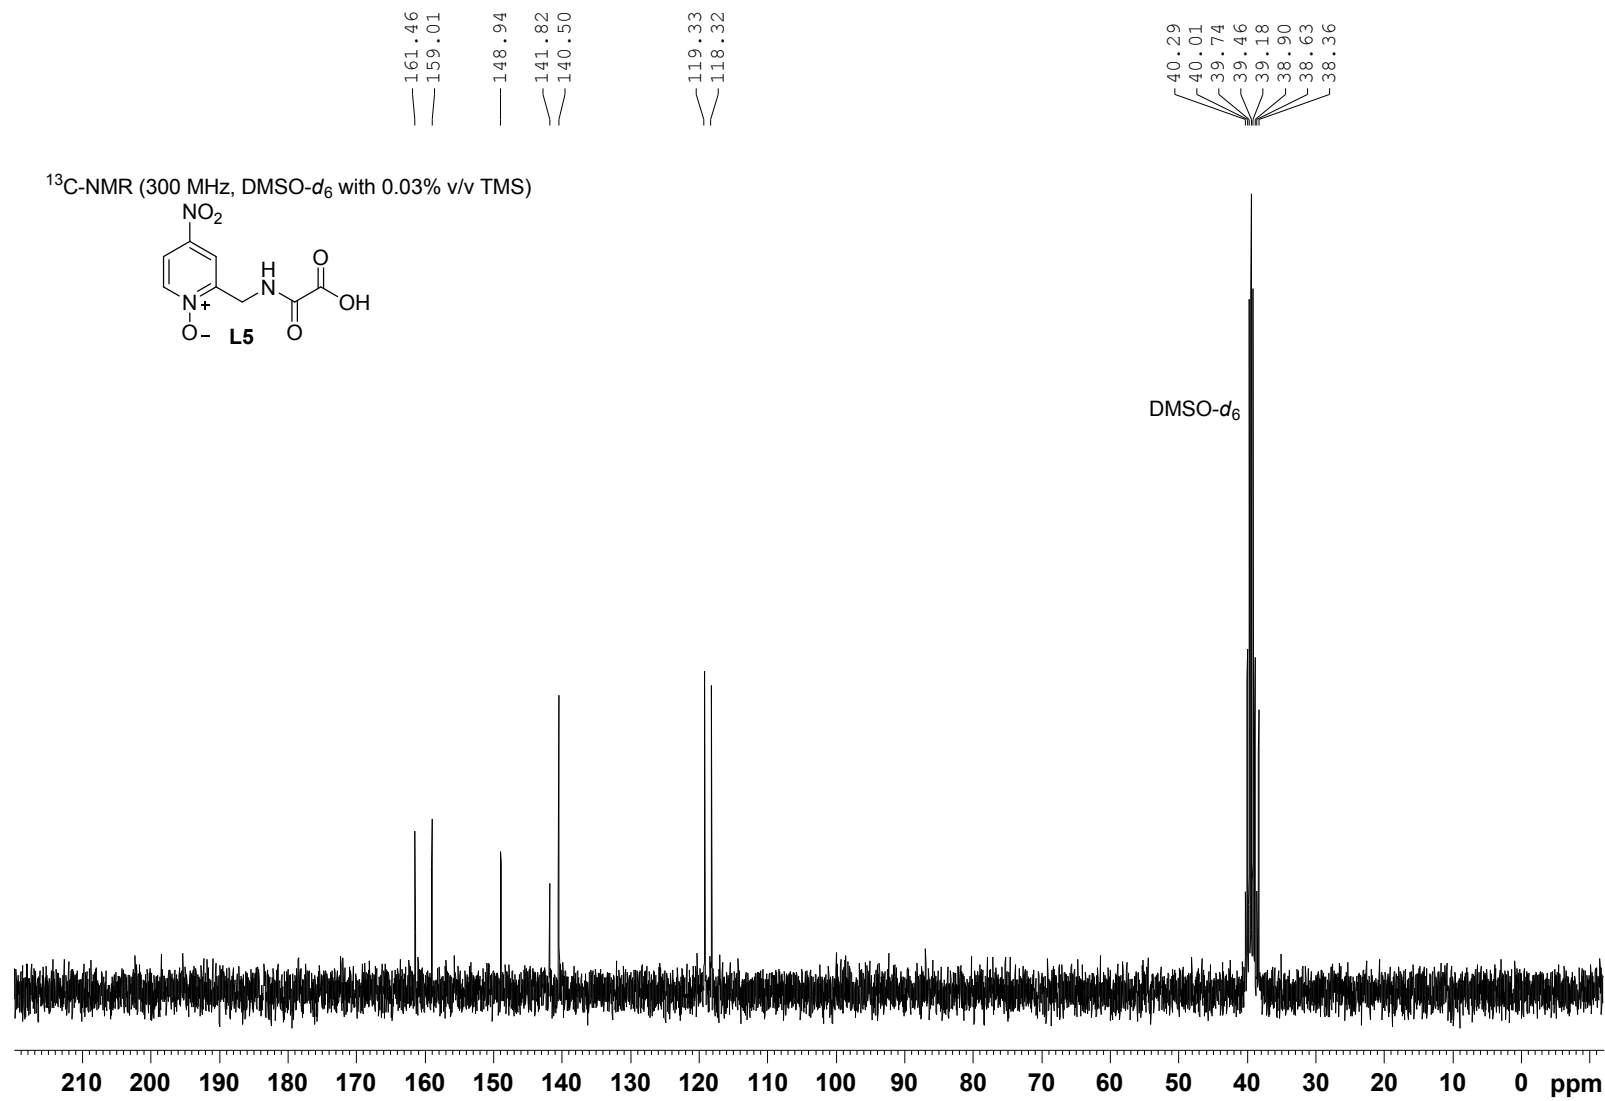

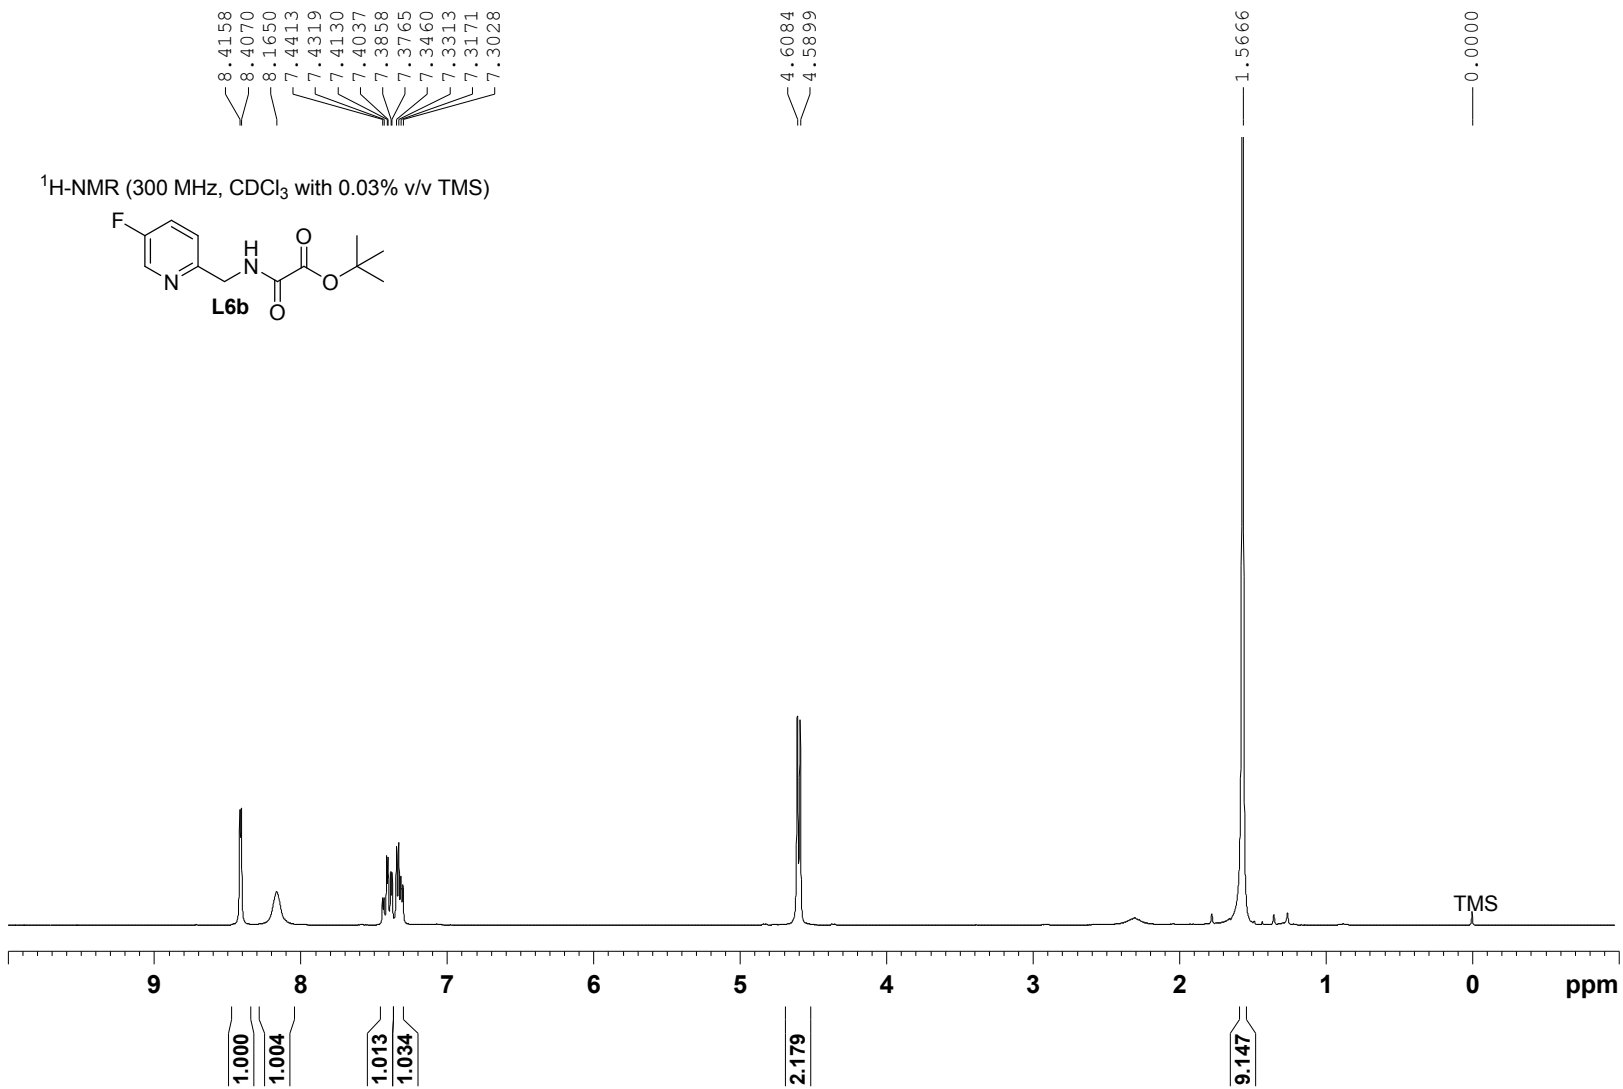

<sup>13</sup>C-NMR (300 MHz, CDCl<sub>3</sub> with 0.03% v/v TMS)

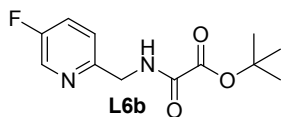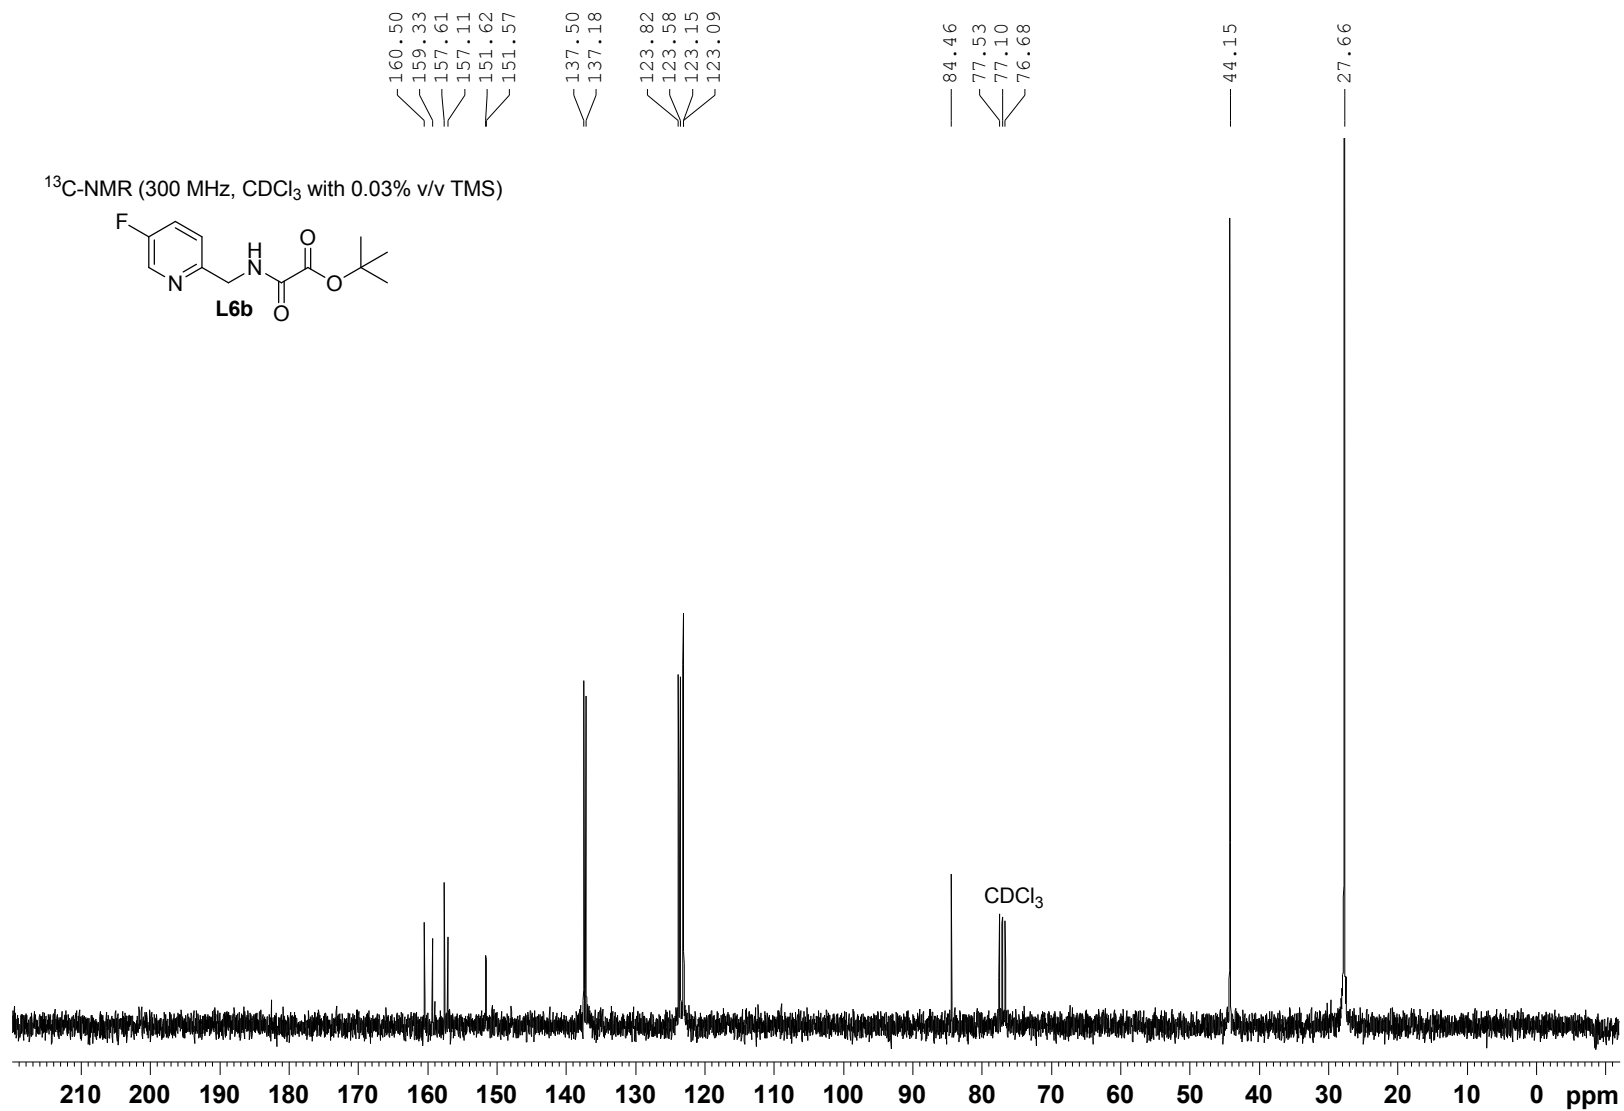

<sup>1</sup>H-NMR (300 MHz, CDCl<sub>3</sub> with 0.03% v/v TMS)

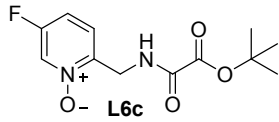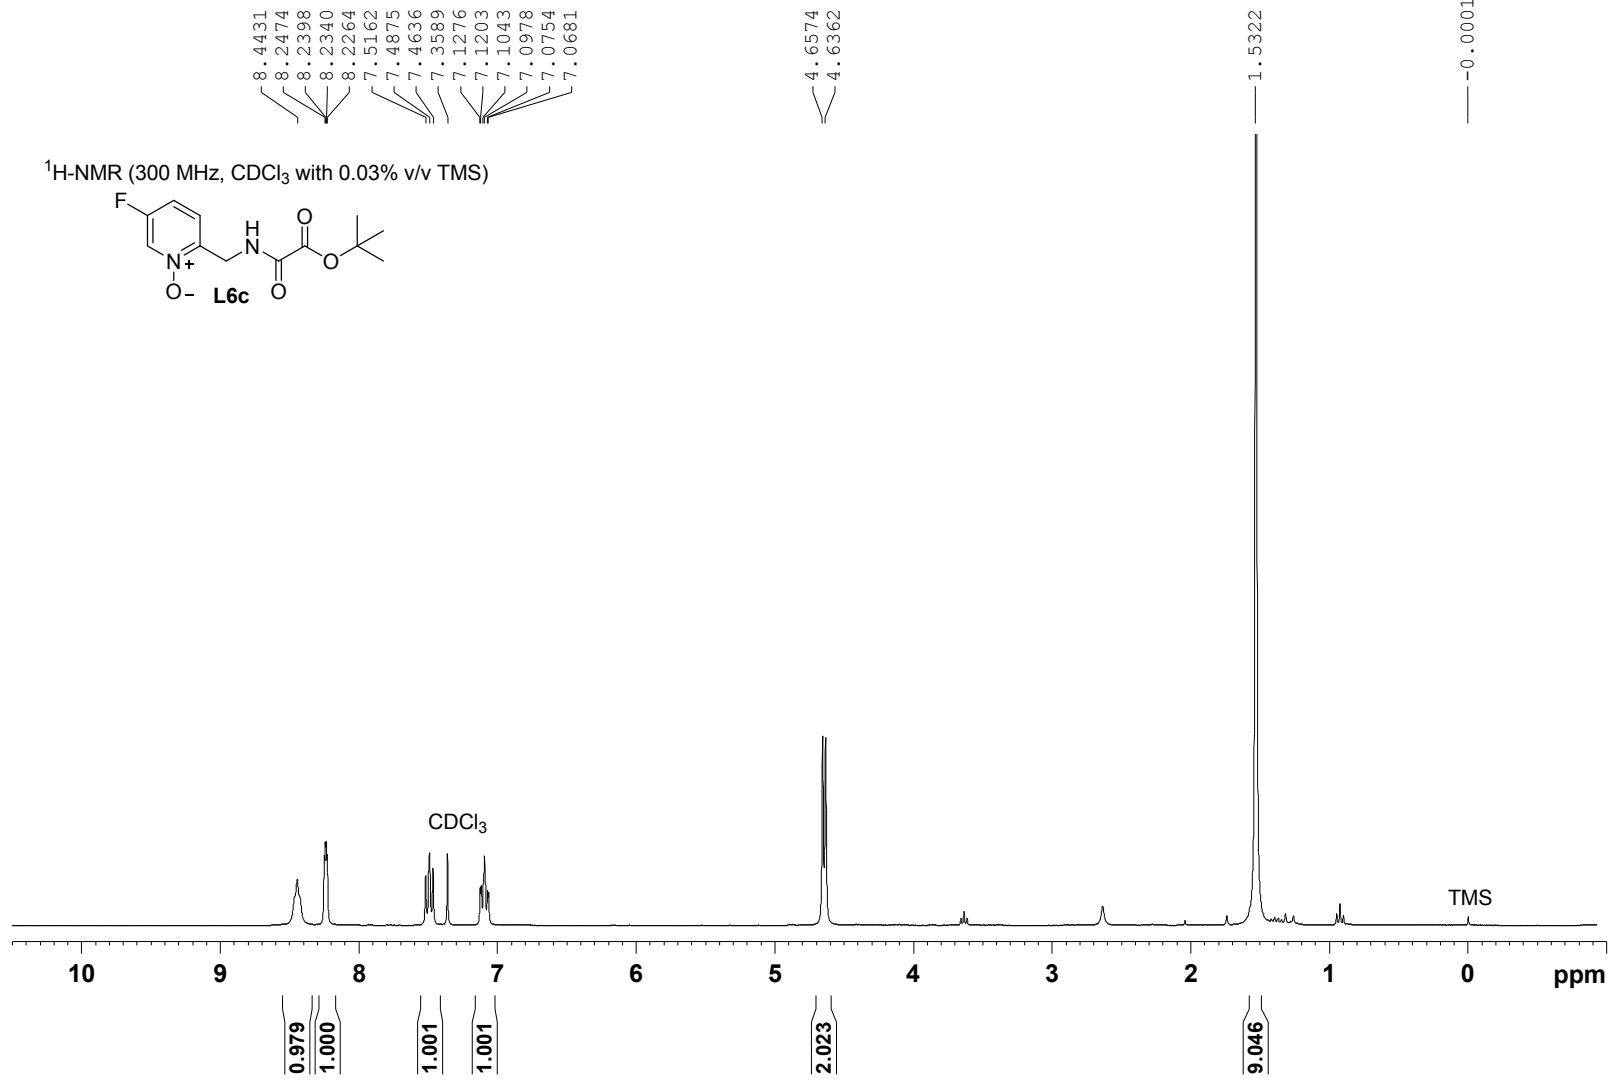

<sup>13</sup>C-NMR (300 MHz, CDCl<sub>3</sub> with 0.03% v/v TMS)

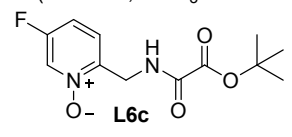

161.43  
158.87  
158.08

143.63  
143.58

129.83  
129.35  
126.36  
126.24

114.07  
113.81

84.49

77.59  
77.16  
76.74

38.91

27.60

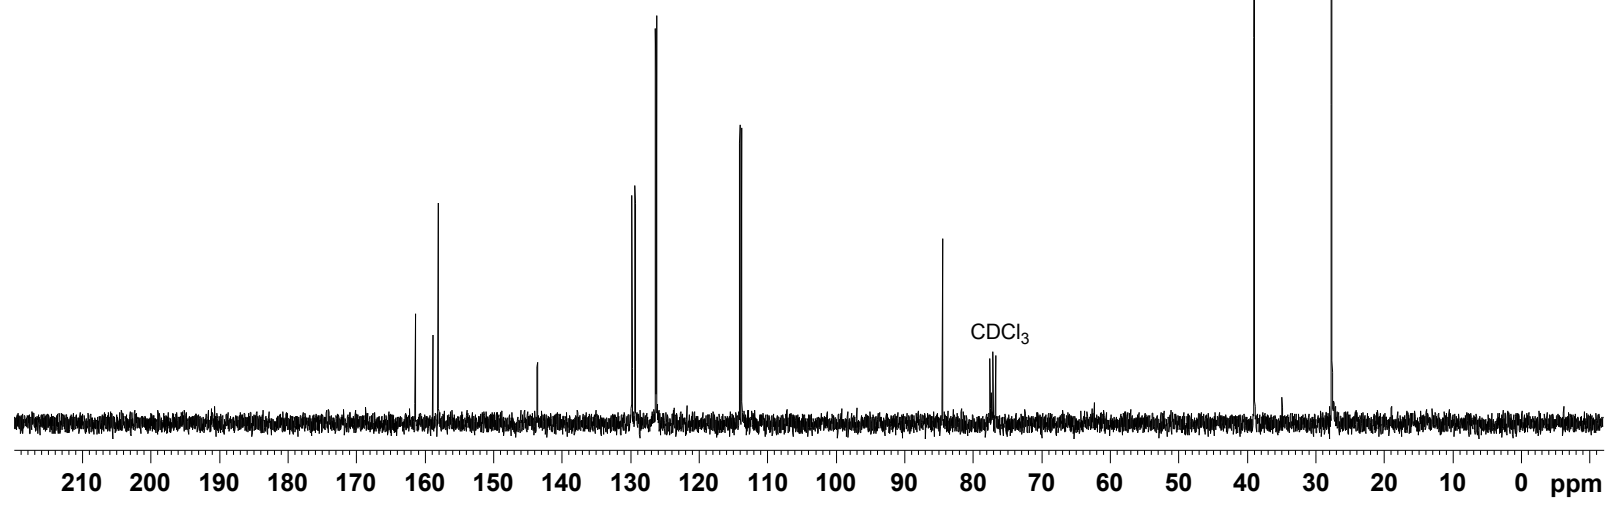

<sup>1</sup>H-NMR (300 MHz, DMSO-d<sub>6</sub> with 0.03% v/v TMS)

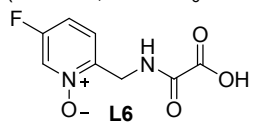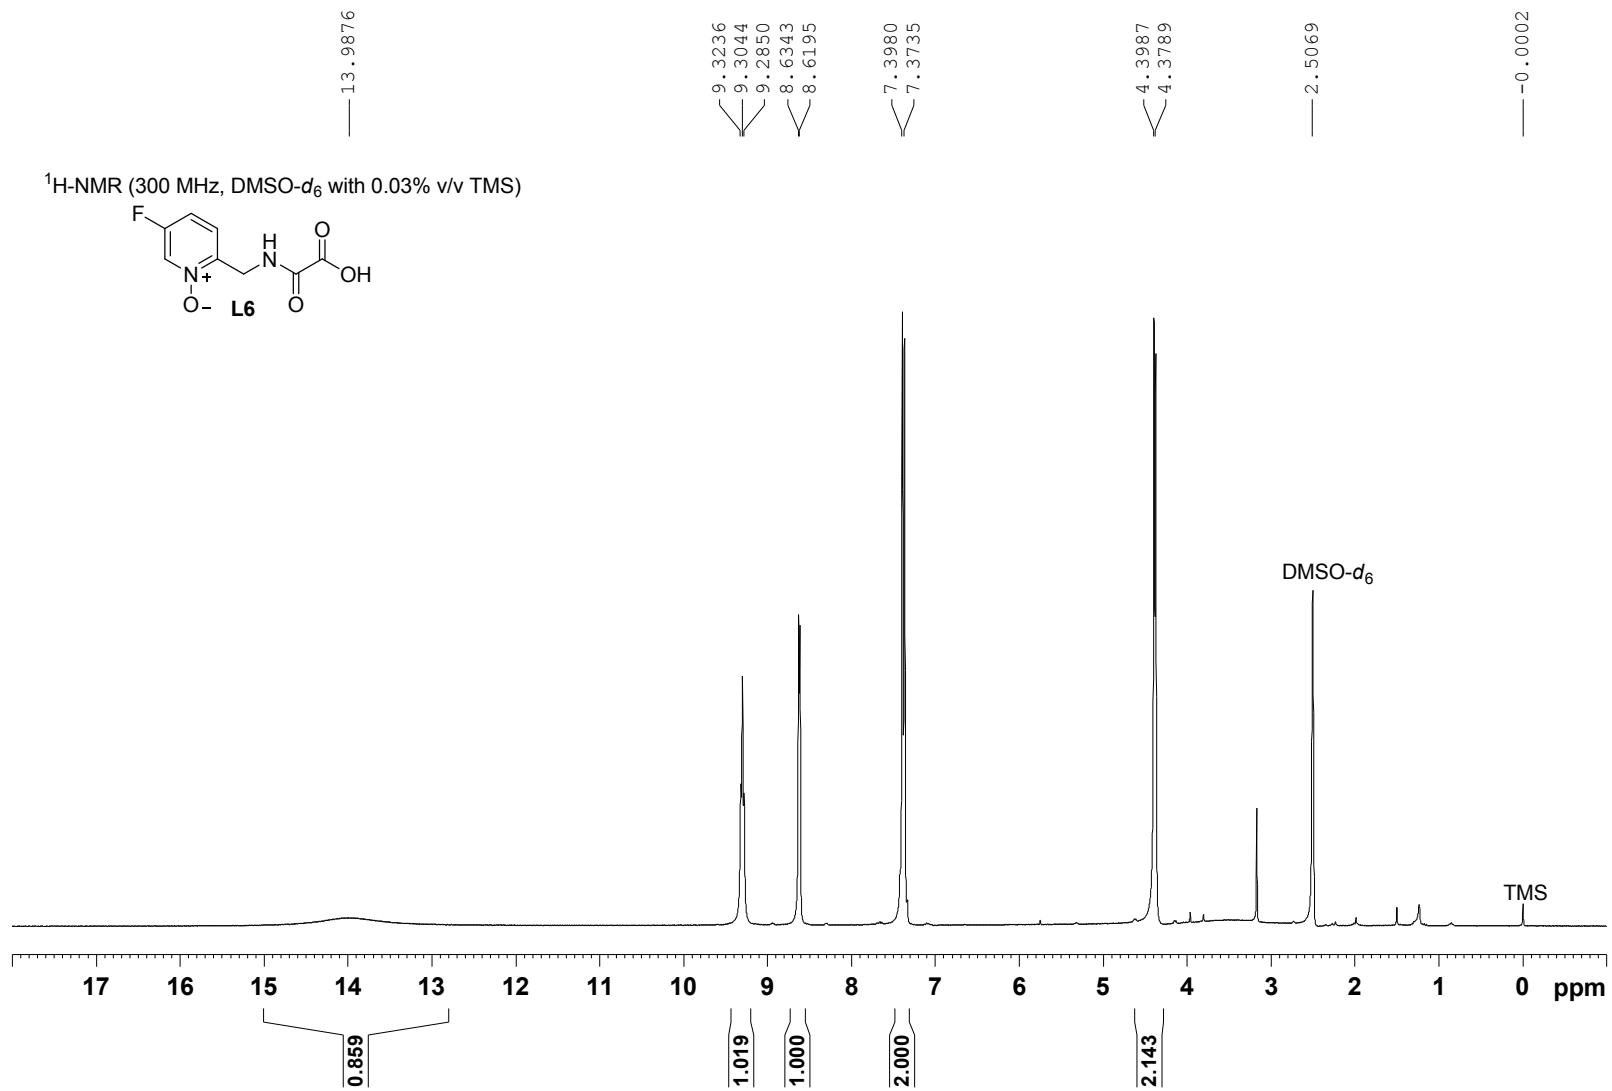

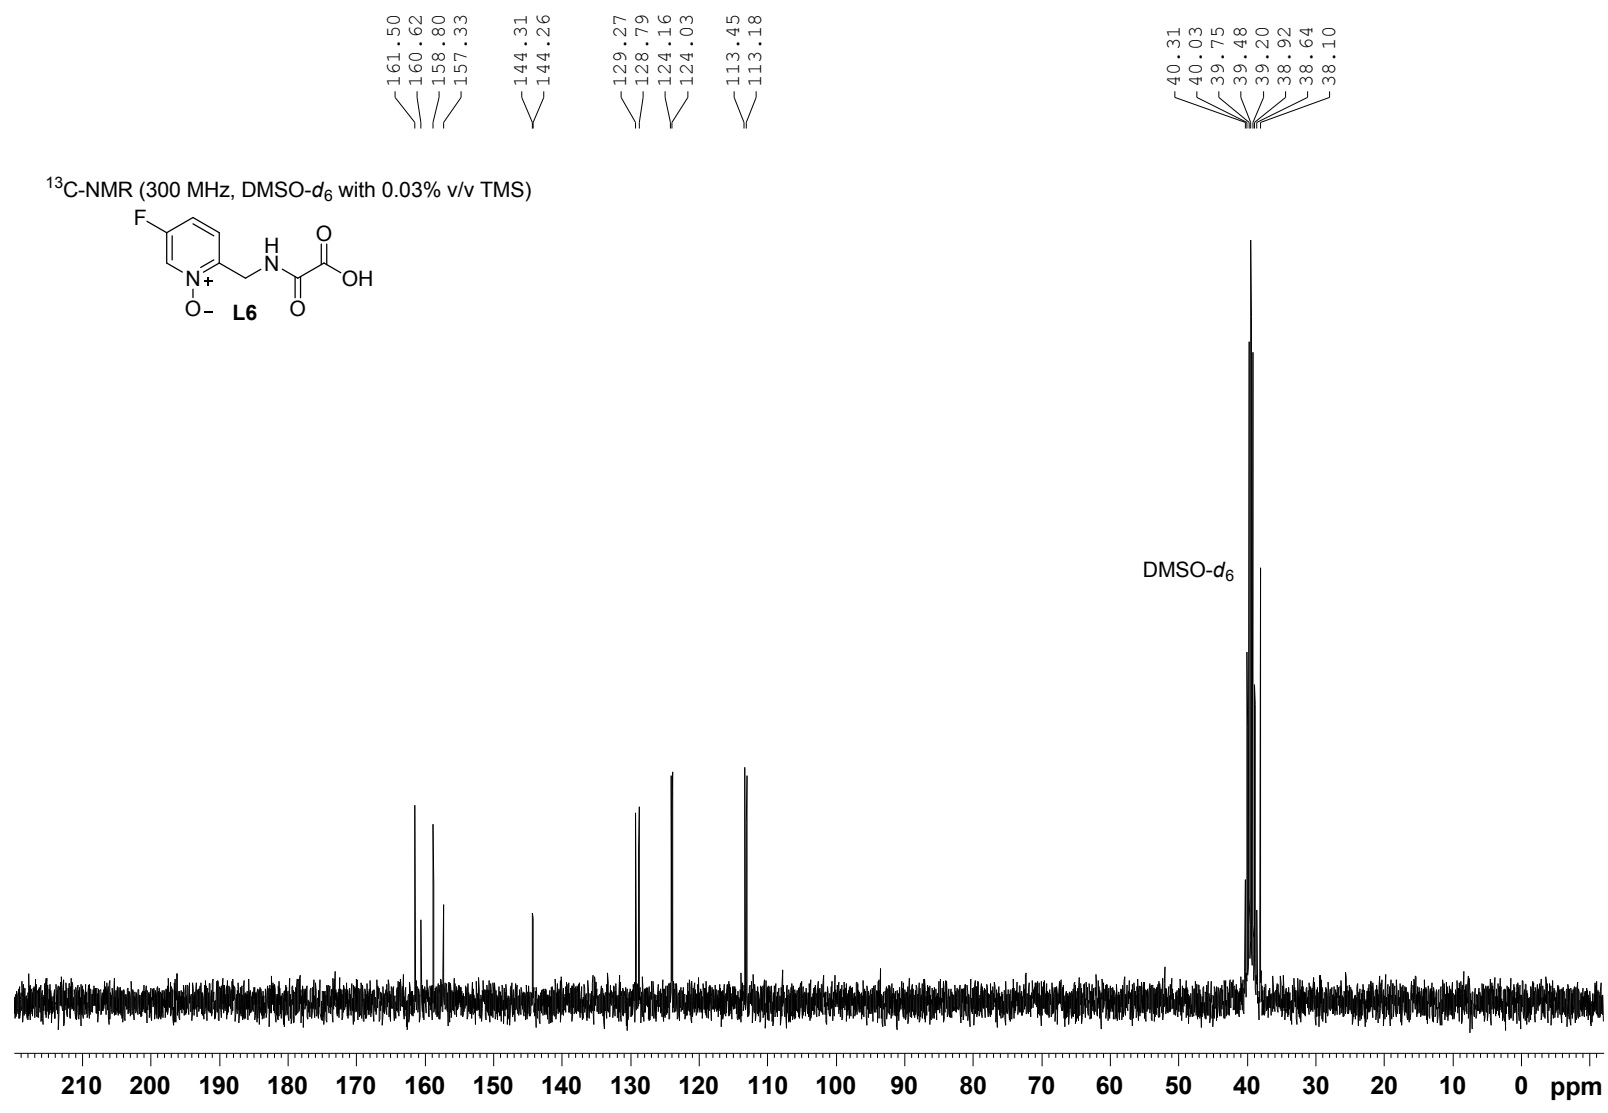



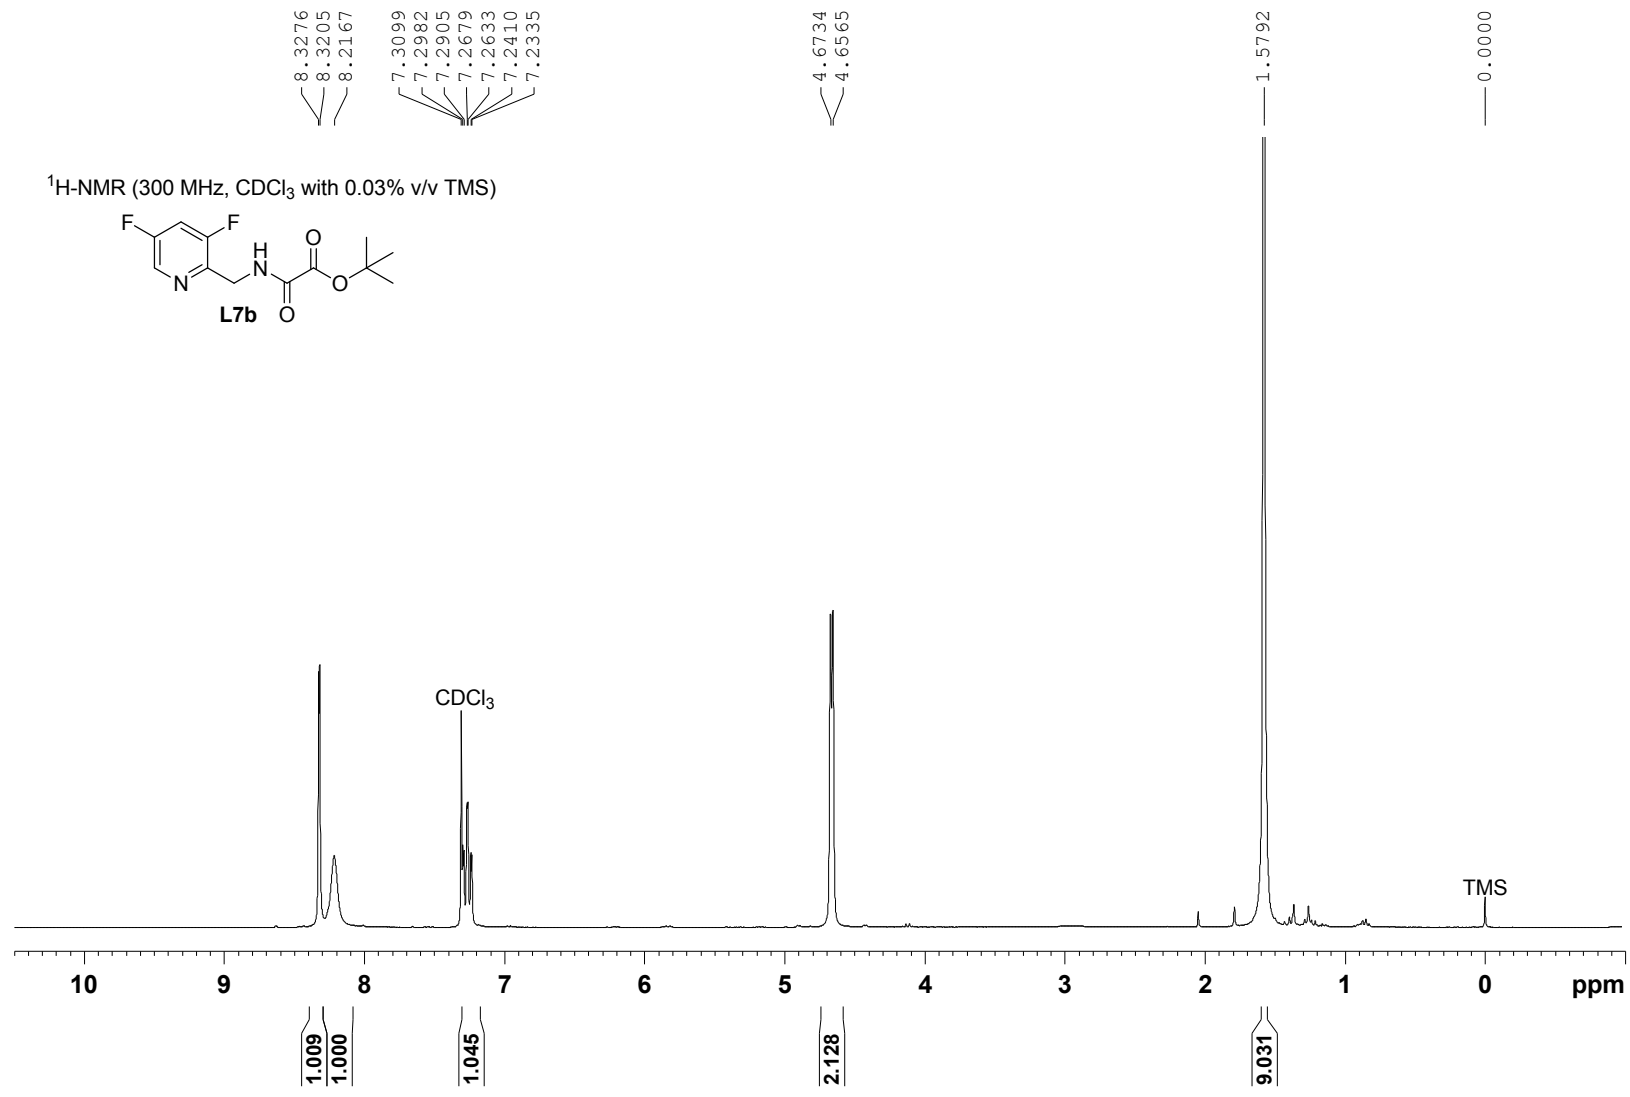

<sup>13</sup>C-NMR (300 MHz, CDCl<sub>3</sub> with 0.03% v/v TMS)

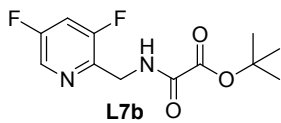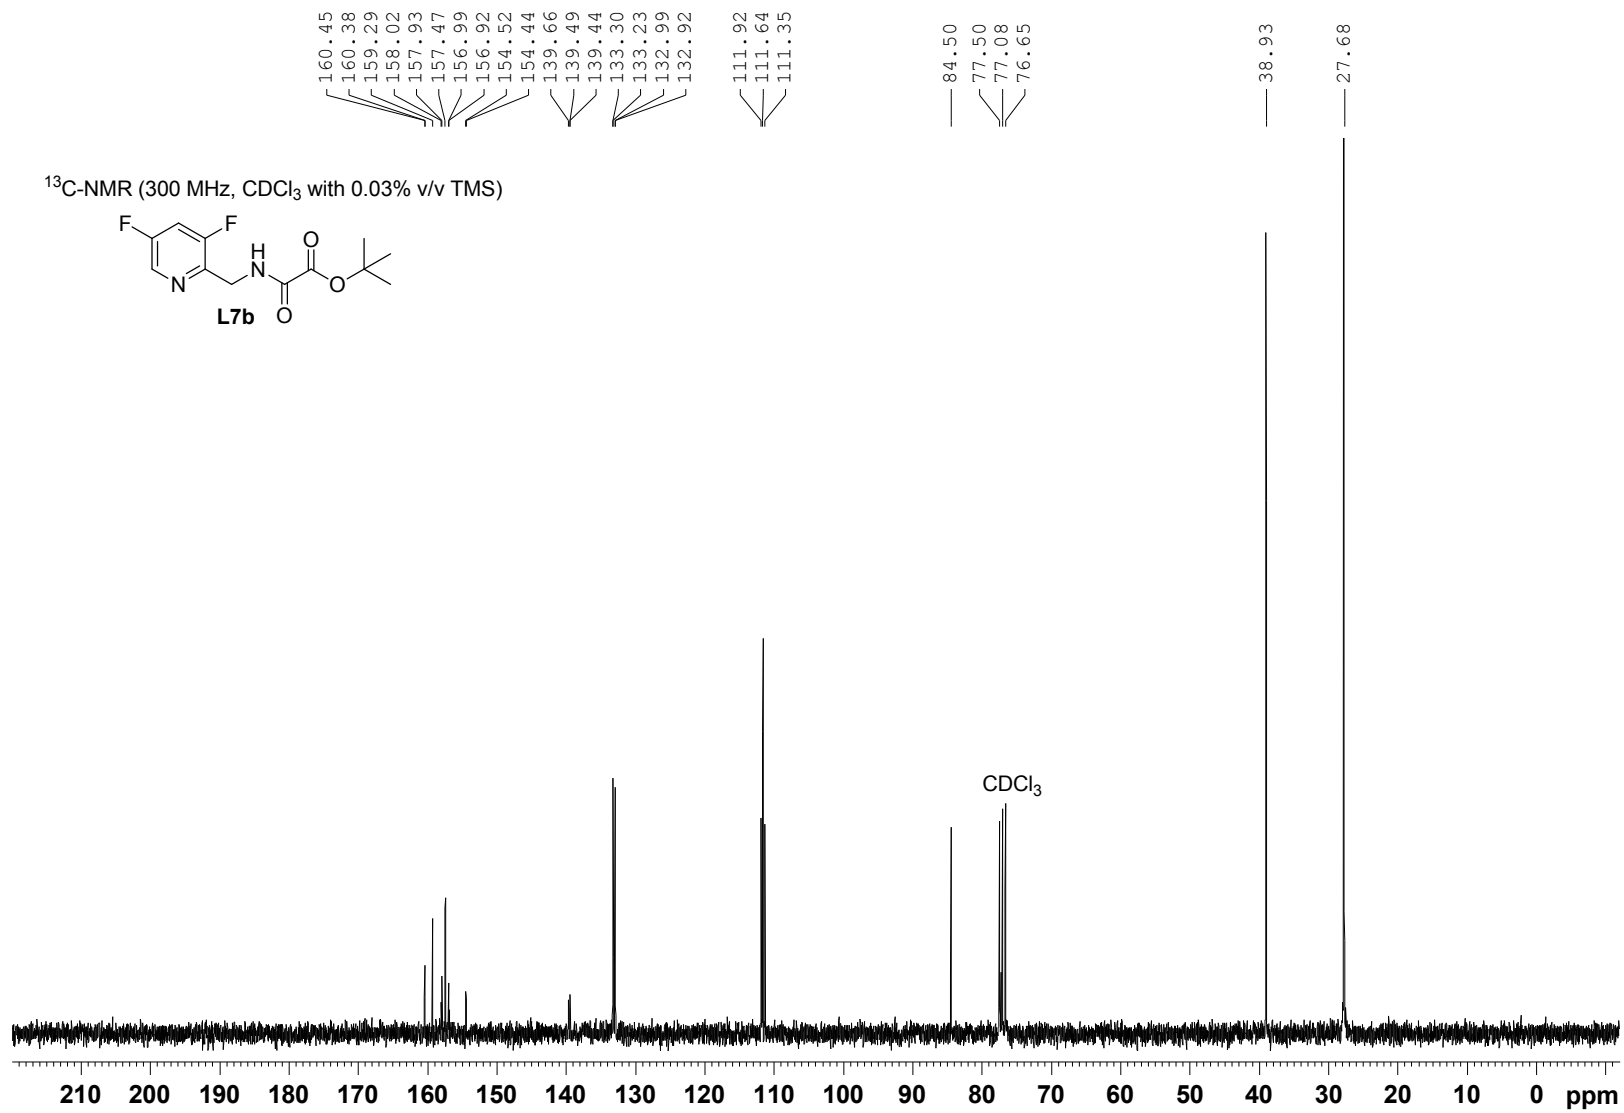

<sup>1</sup>H-NMR (300 MHz, CDCl<sub>3</sub> with 0.03% v/v TMS)

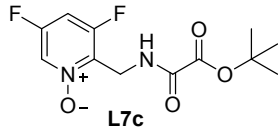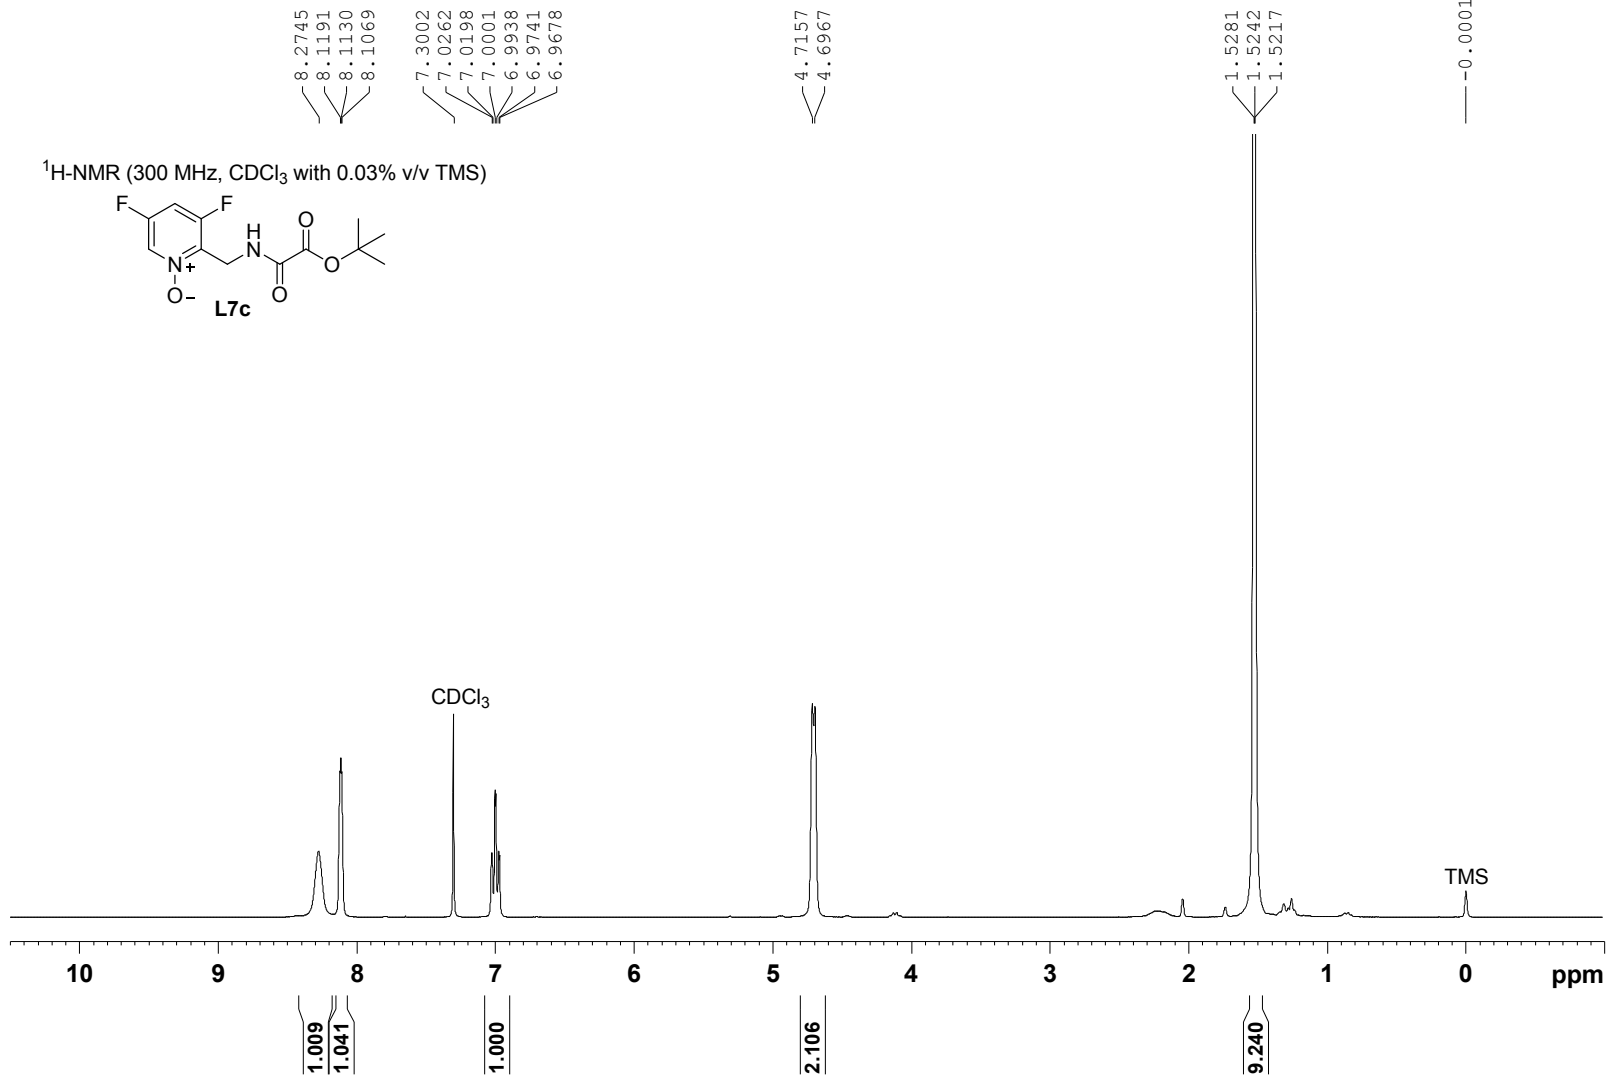

<sup>13</sup>C-NMR (300 MHz, CDCl<sub>3</sub> with 0.03% v/v TMS)

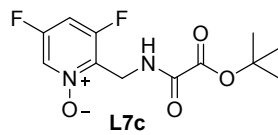

161.00  
160.79  
159.93  
159.73  
158.81  
157.68  
157.43

135.16  
135.03  
134.67  
134.45  
127.00  
126.93  
126.52  
126.46

104.18  
103.86  
103.52

84.54  
77.48  
77.07  
76.64

32.70  
27.64

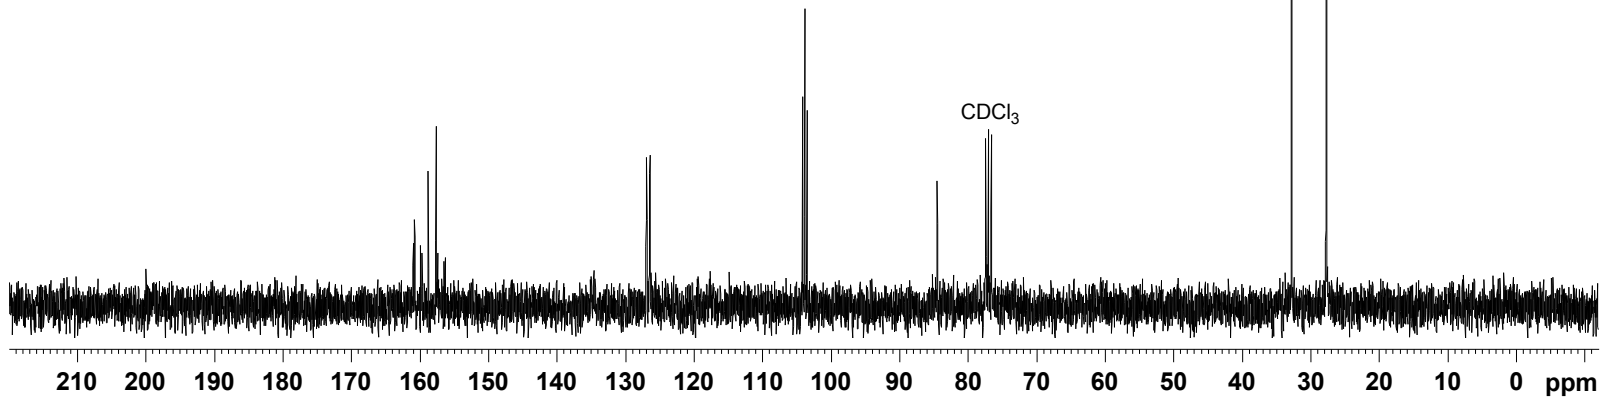

<sup>1</sup>H-NMR (300 MHz, DMSO-d<sub>6</sub> with 0.03% v/v TMS)

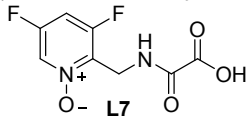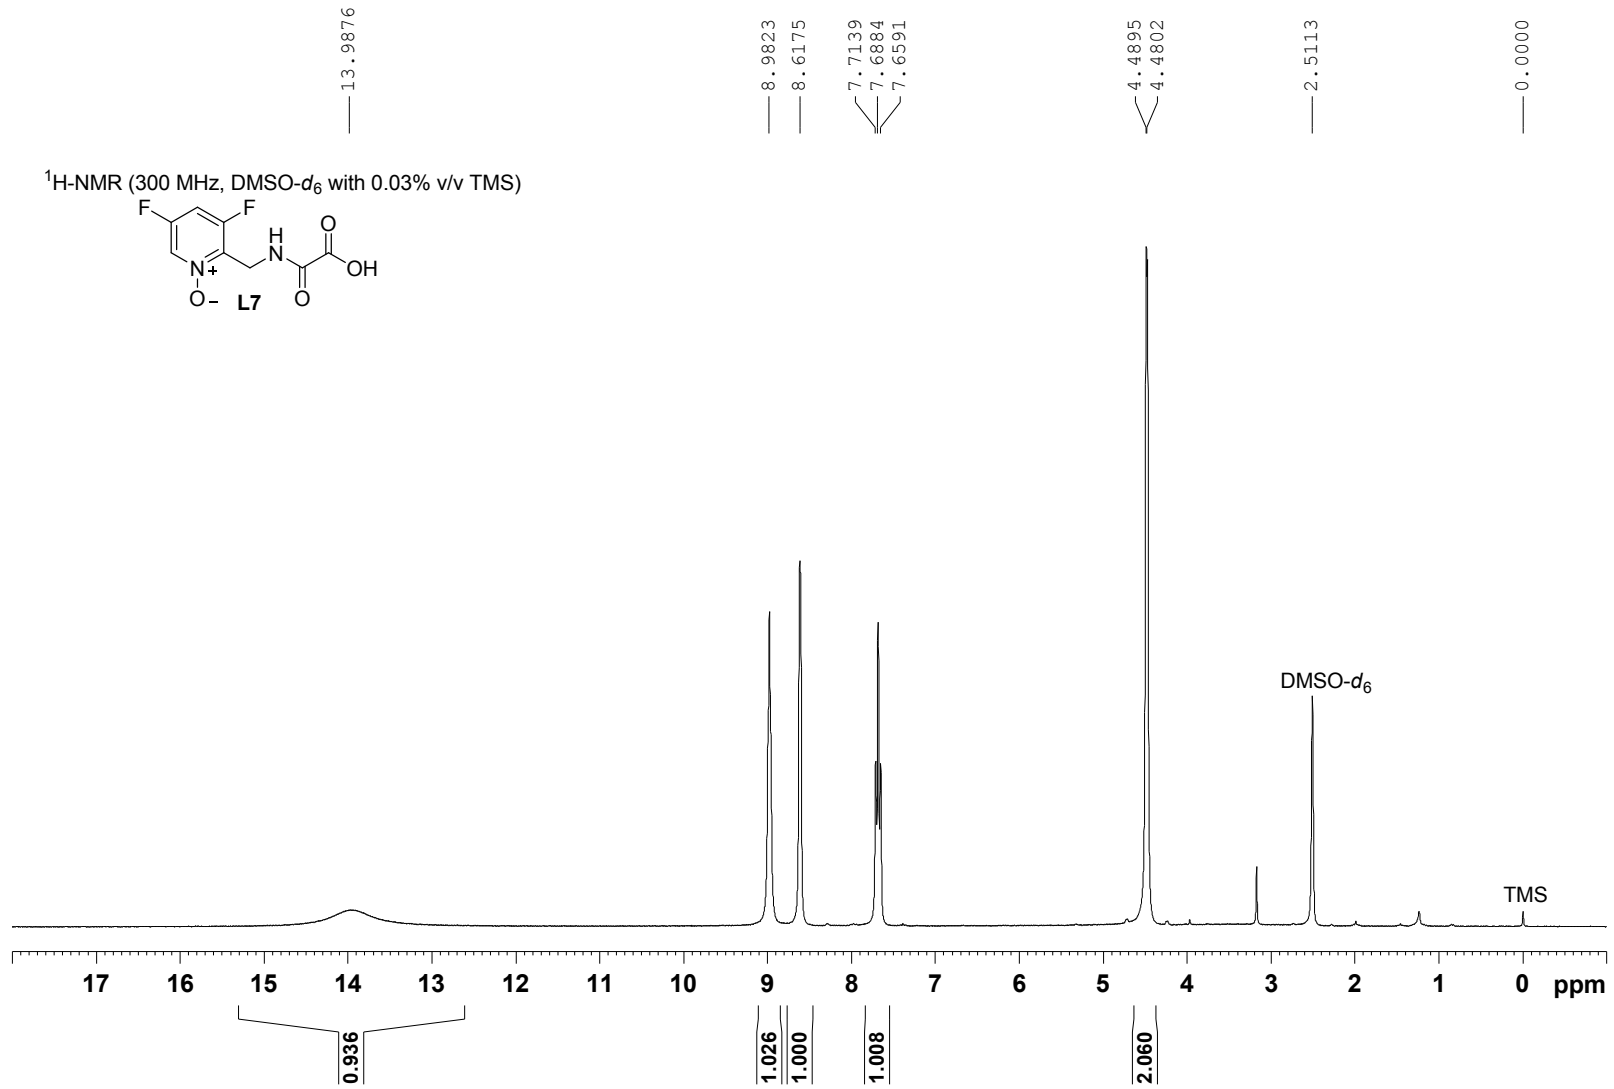

<sup>13</sup>C-NMR (300 MHz, DMSO-*d*<sub>6</sub> with 0.03% v/v TMS)

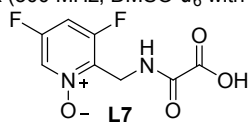

161.53  
160.56  
160.33  
160.15  
158.28  
157.28  
157.04  
156.83  
156.62  
134.88  
134.81  
134.52  
134.45  
126.88  
126.81  
126.39  
126.32

103.83  
103.49  
103.14

40.27  
39.99  
39.71  
39.44  
39.16  
38.88  
38.60  
32.51

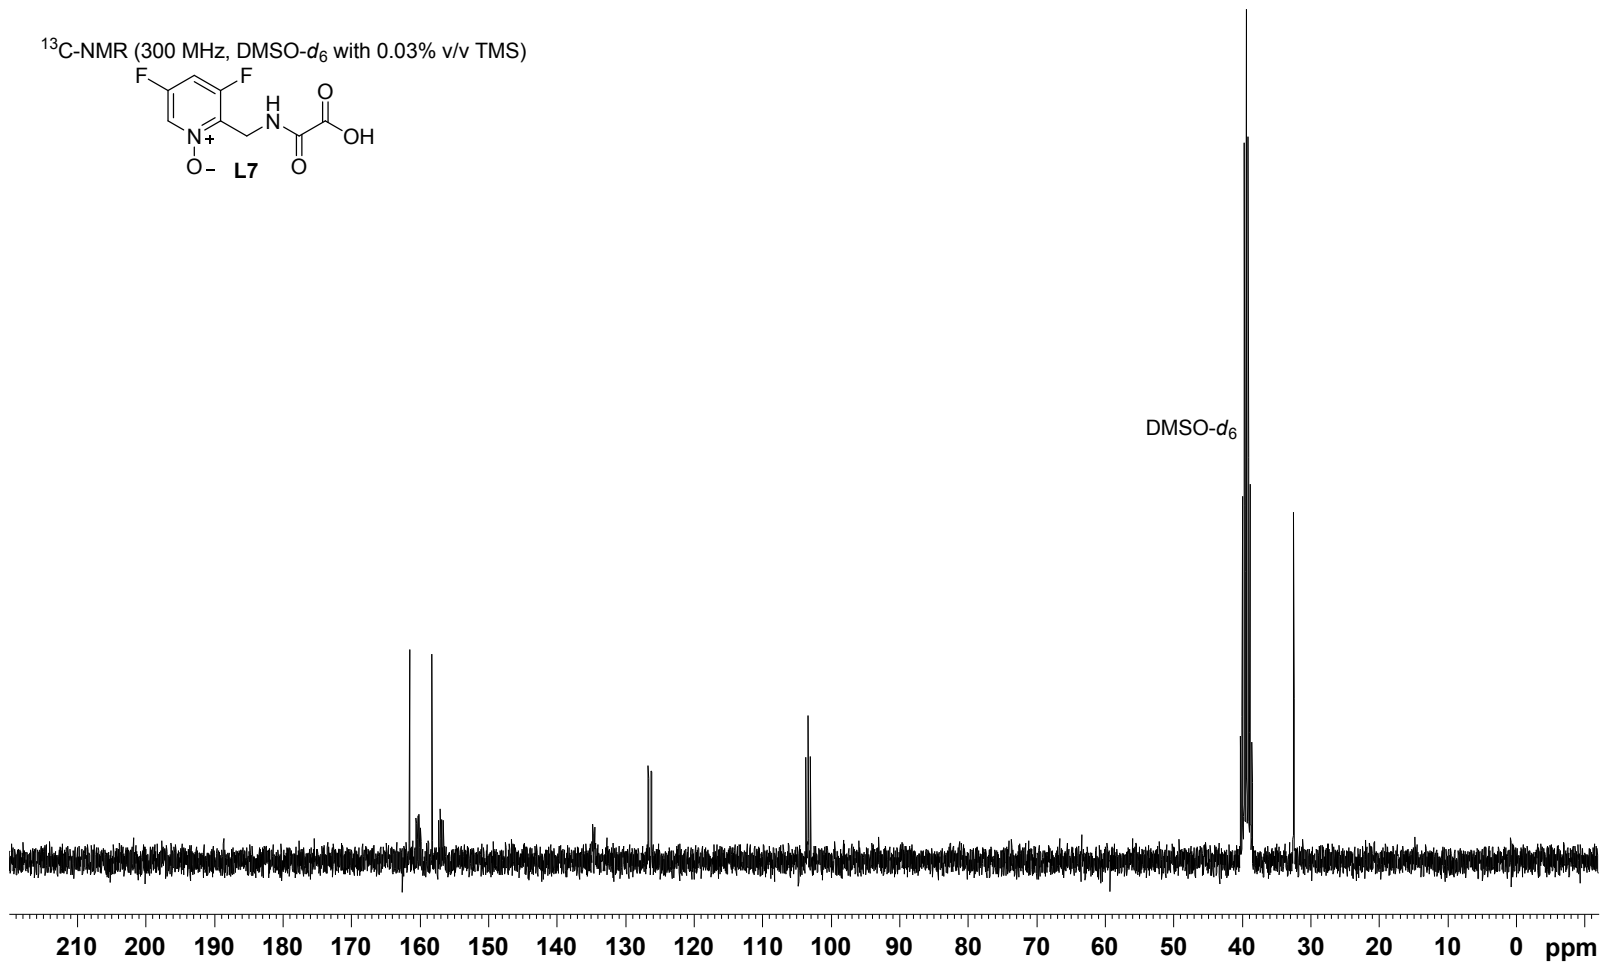

<sup>1</sup>H-NMR (300 MHz, CDCl<sub>3</sub> with 0.03% v/v TMS)

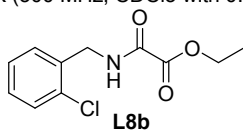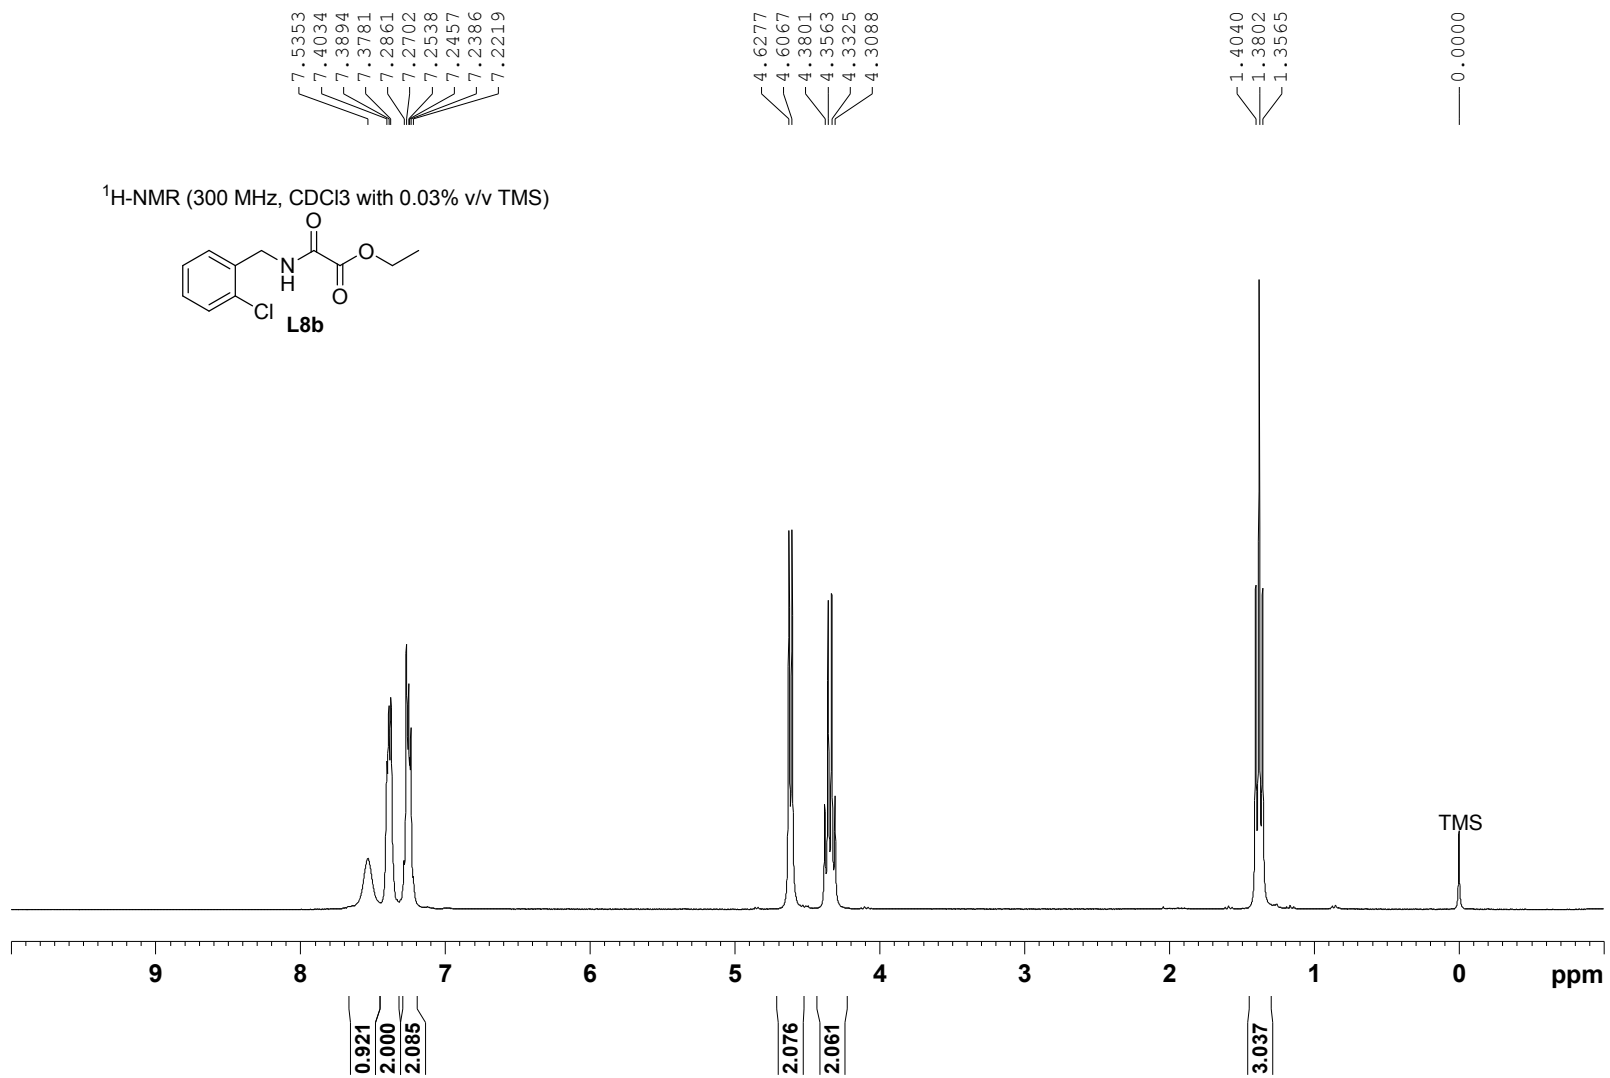

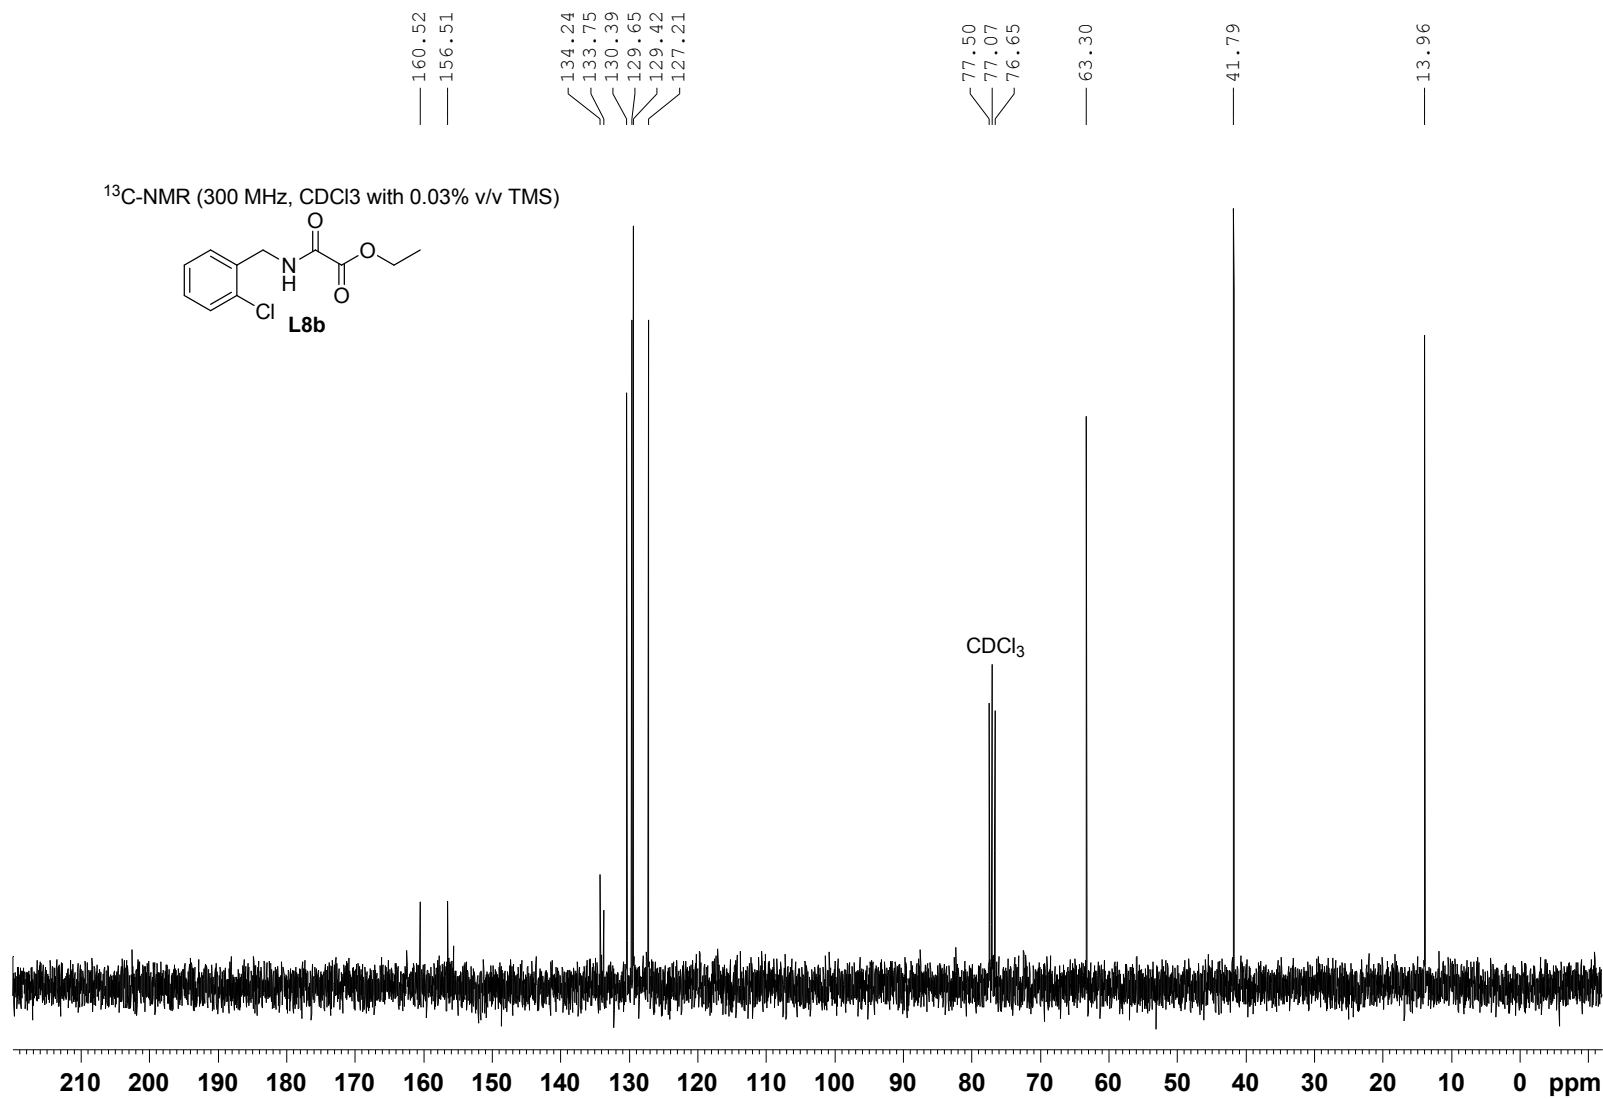



<sup>1</sup>H-NMR (300 MHz, DMSO-d<sub>6</sub> with 0.03% v/v TMS)

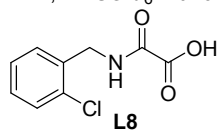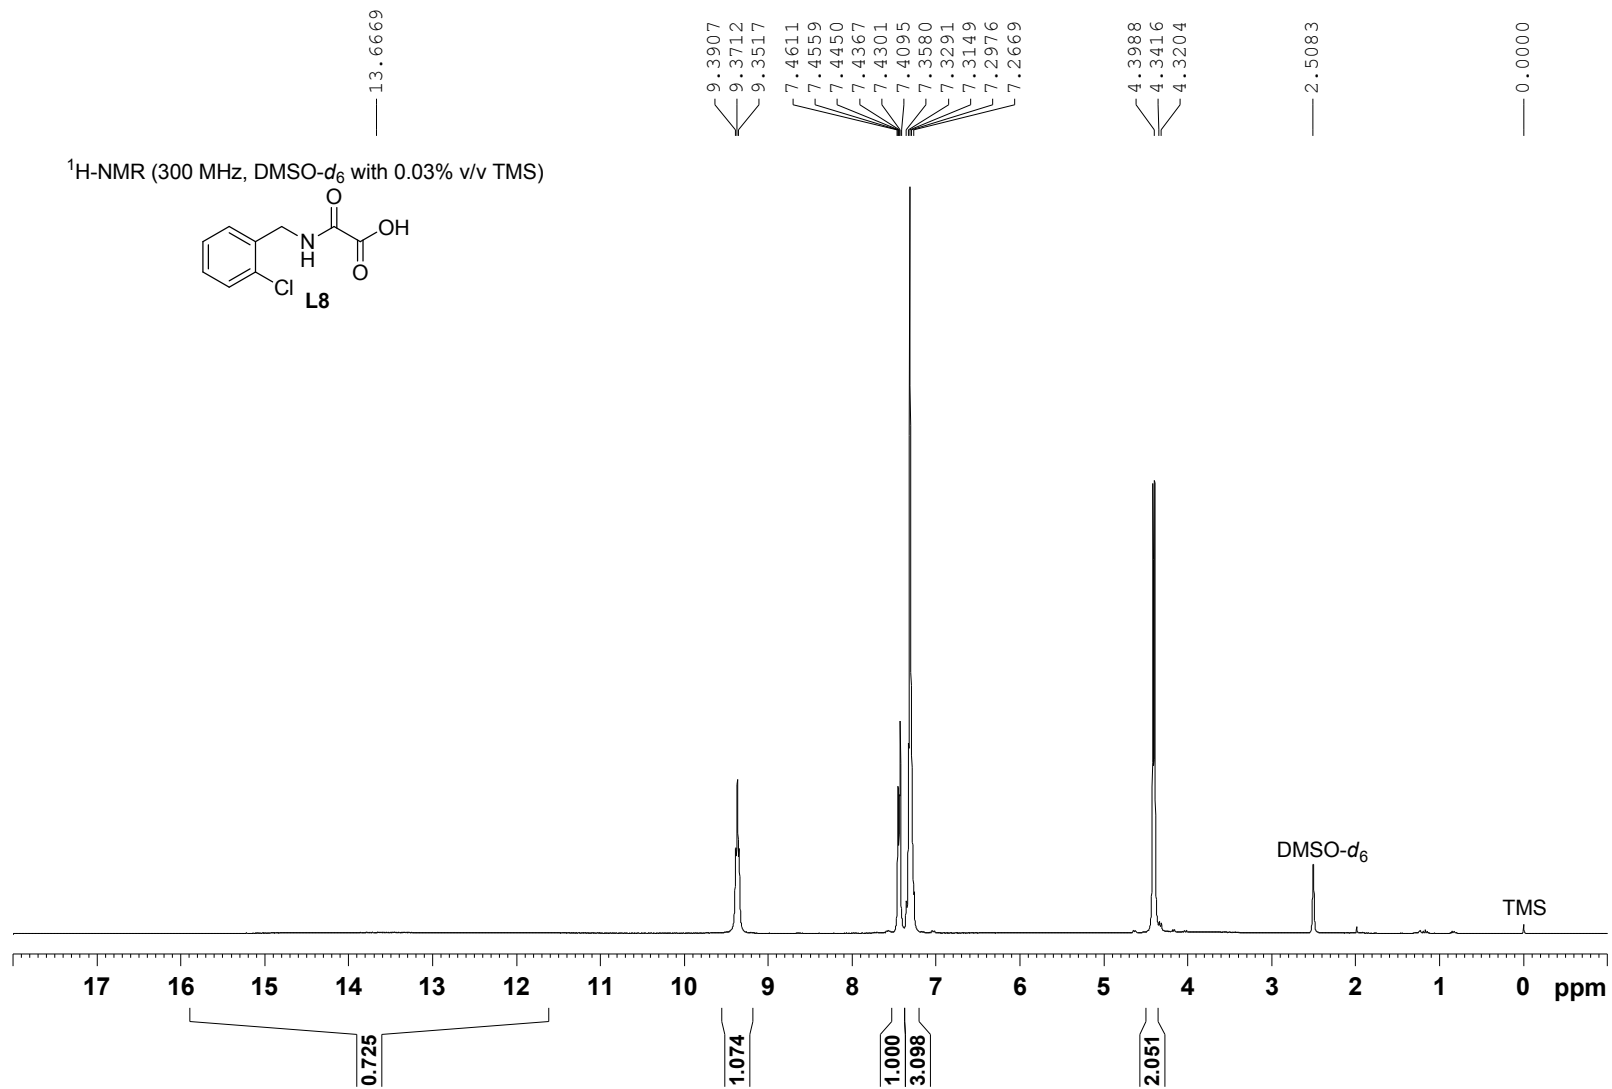

<sup>13</sup>C-NMR (300 MHz, DMSO-*d*<sub>6</sub> with 0.03% v/v TMS)

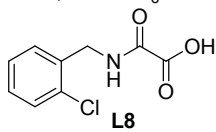

161.90  
158.65

135.22  
131.82  
129.08  
128.68  
128.45  
127.14

40.28  
39.97  
39.69  
39.41  
39.13  
38.86

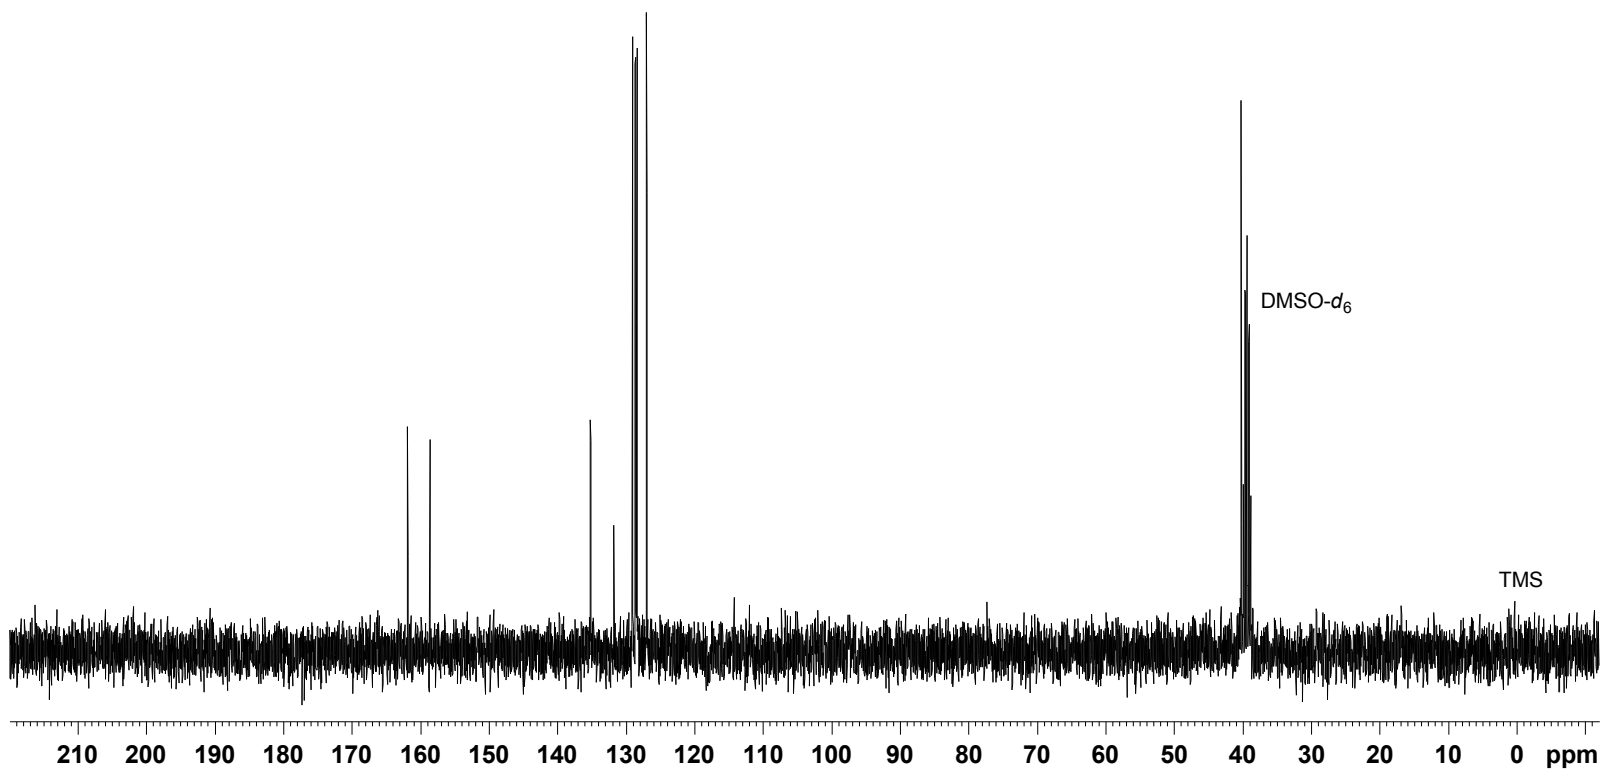

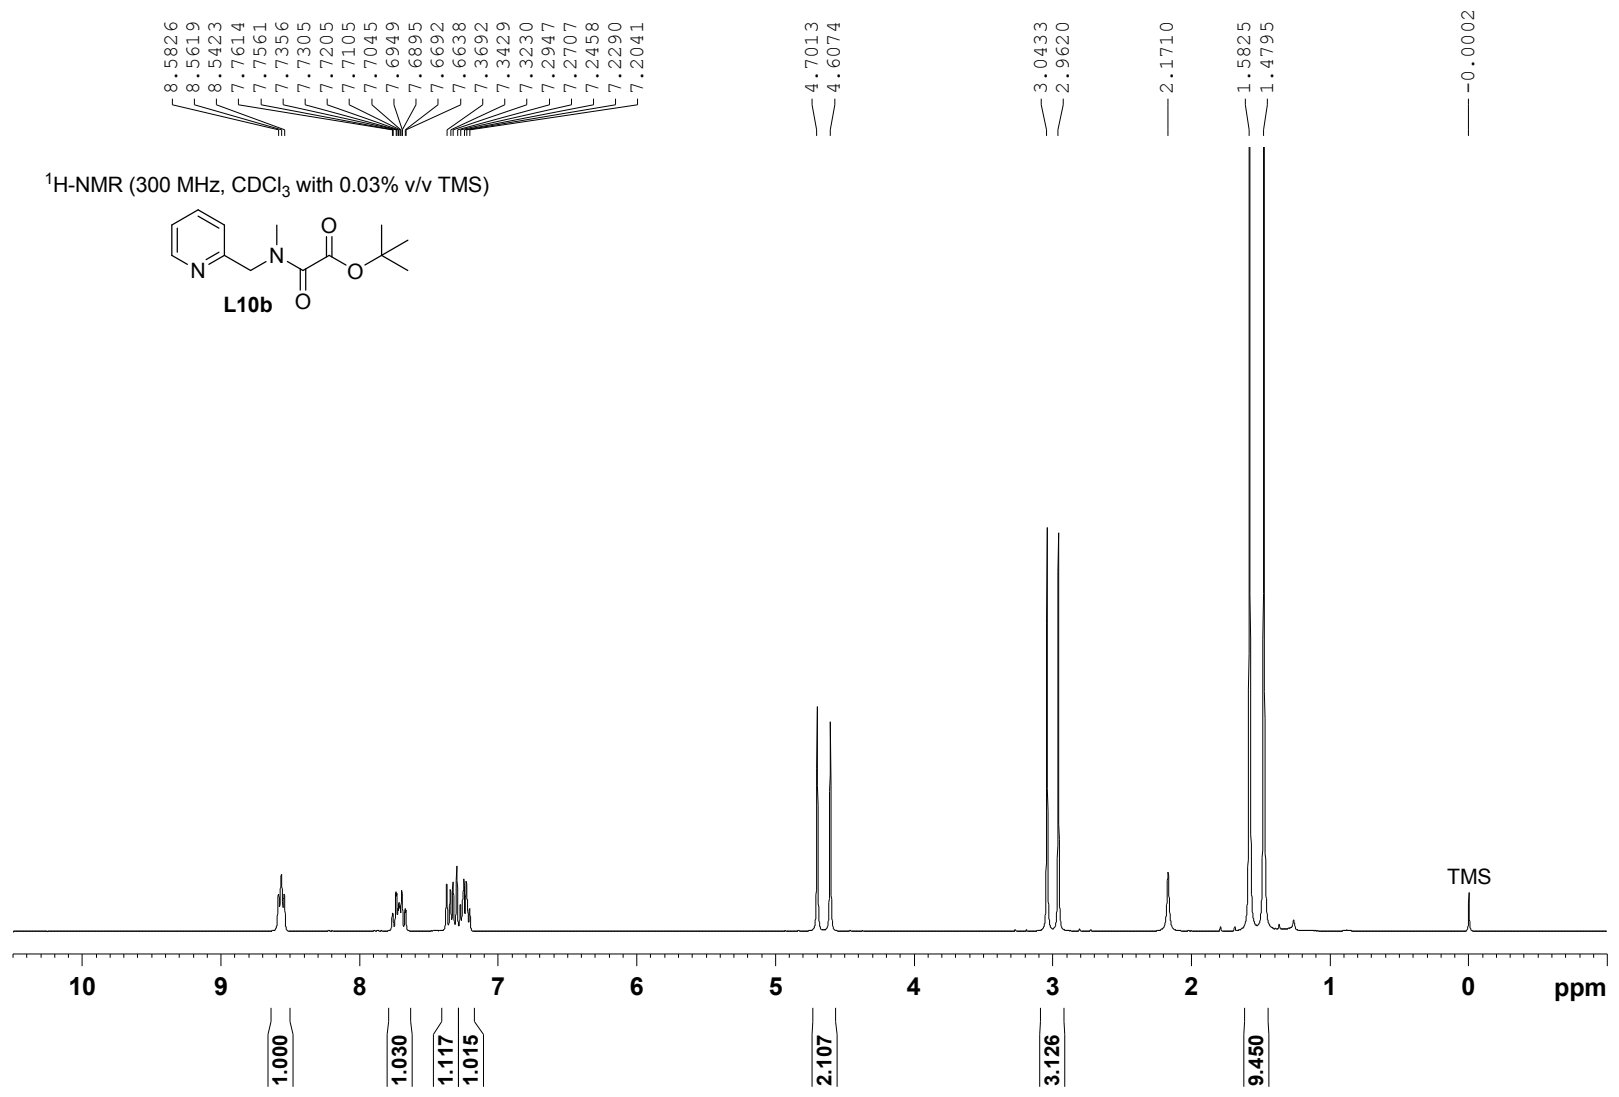

<sup>13</sup>C-NMR (300 MHz, CDCl<sub>3</sub> with 0.03% v/v TMS)

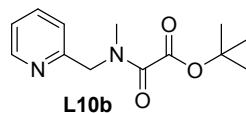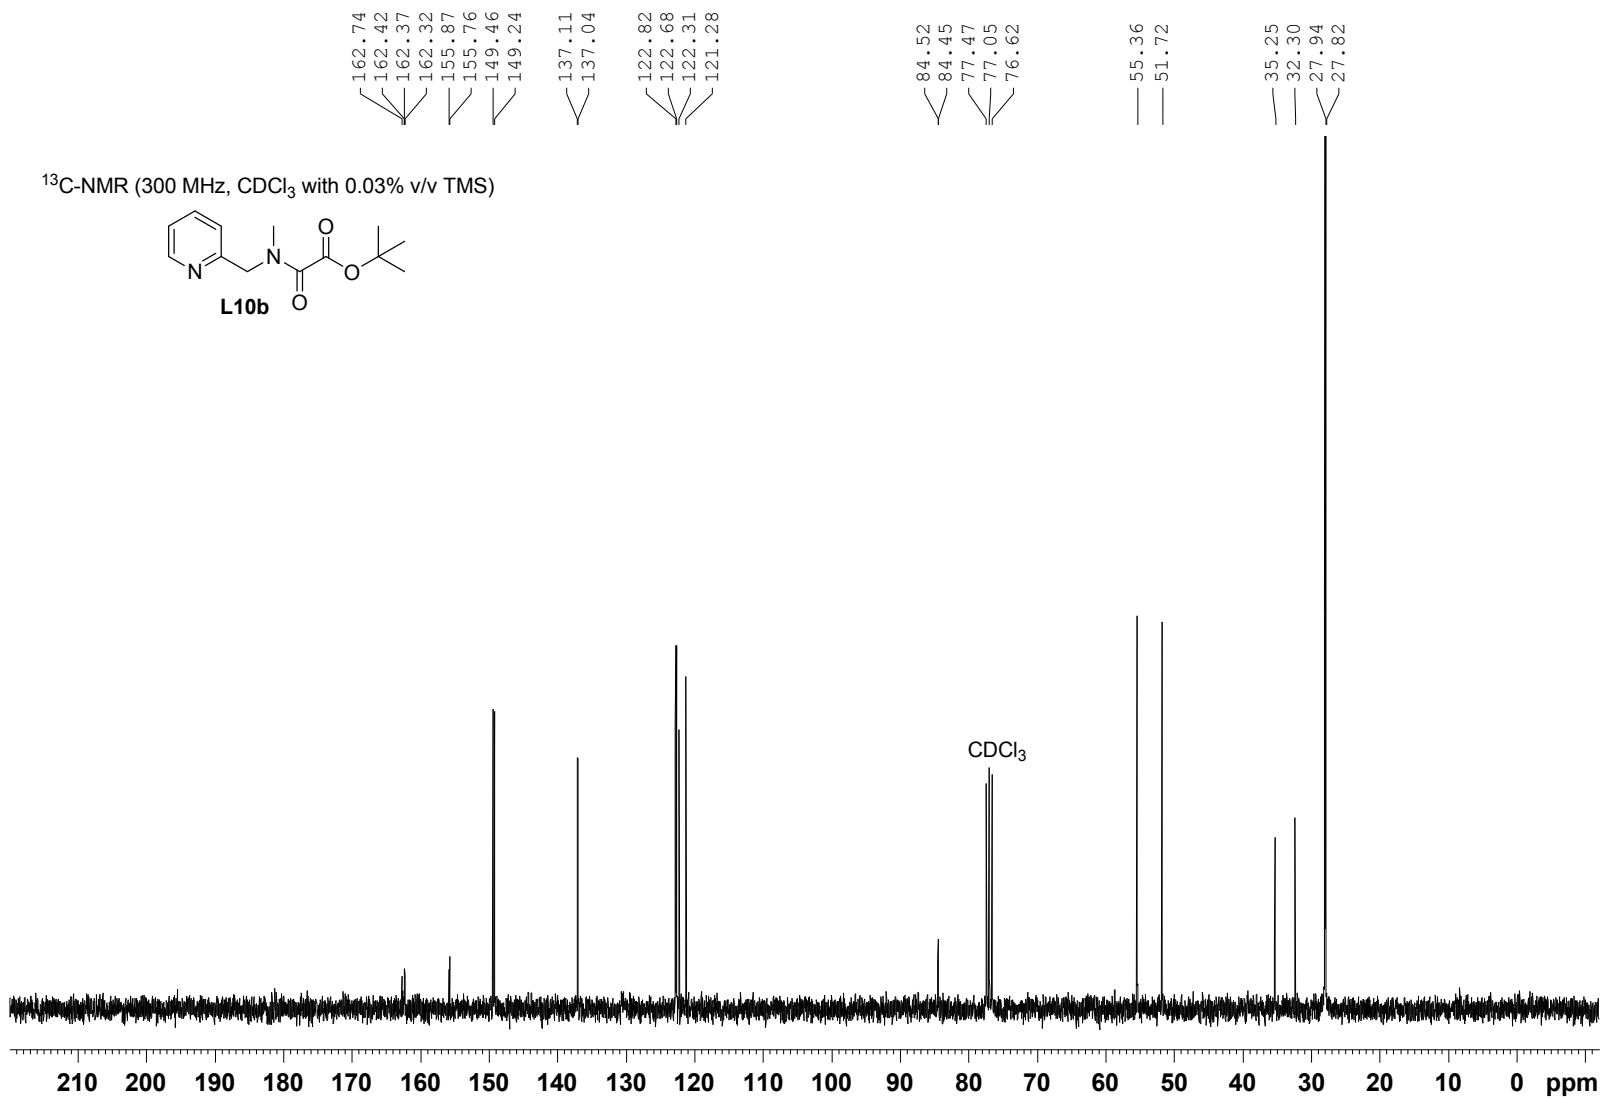

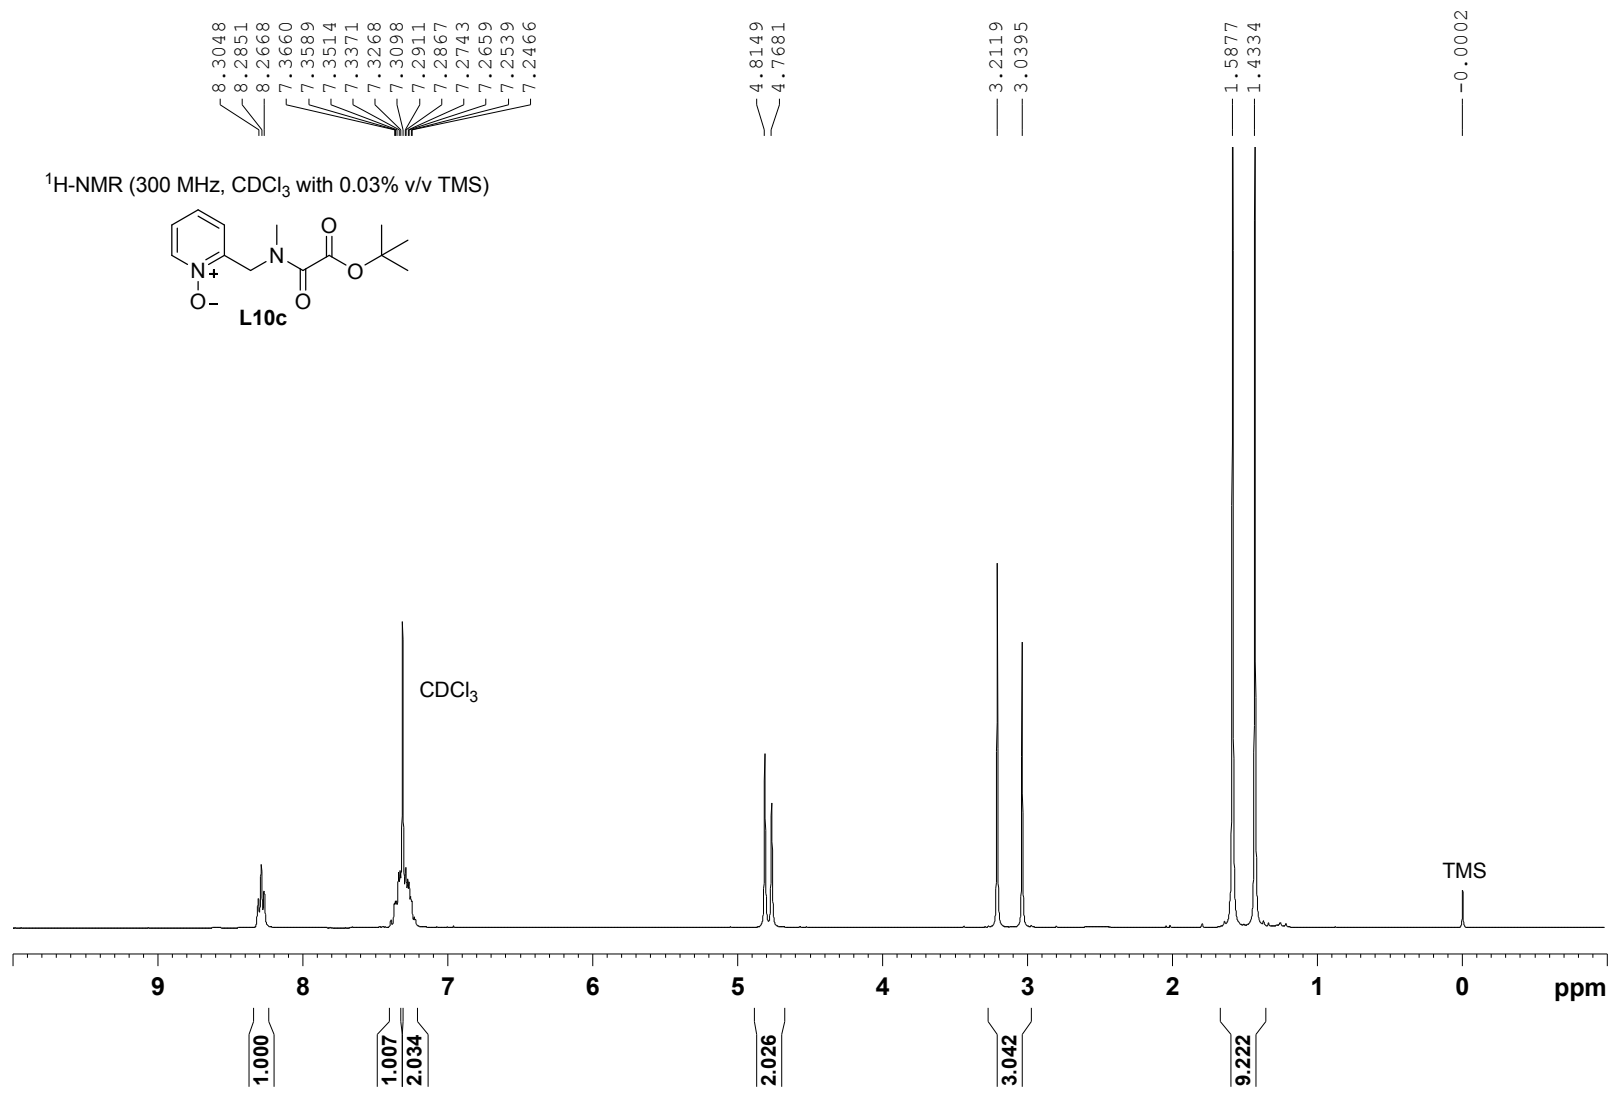

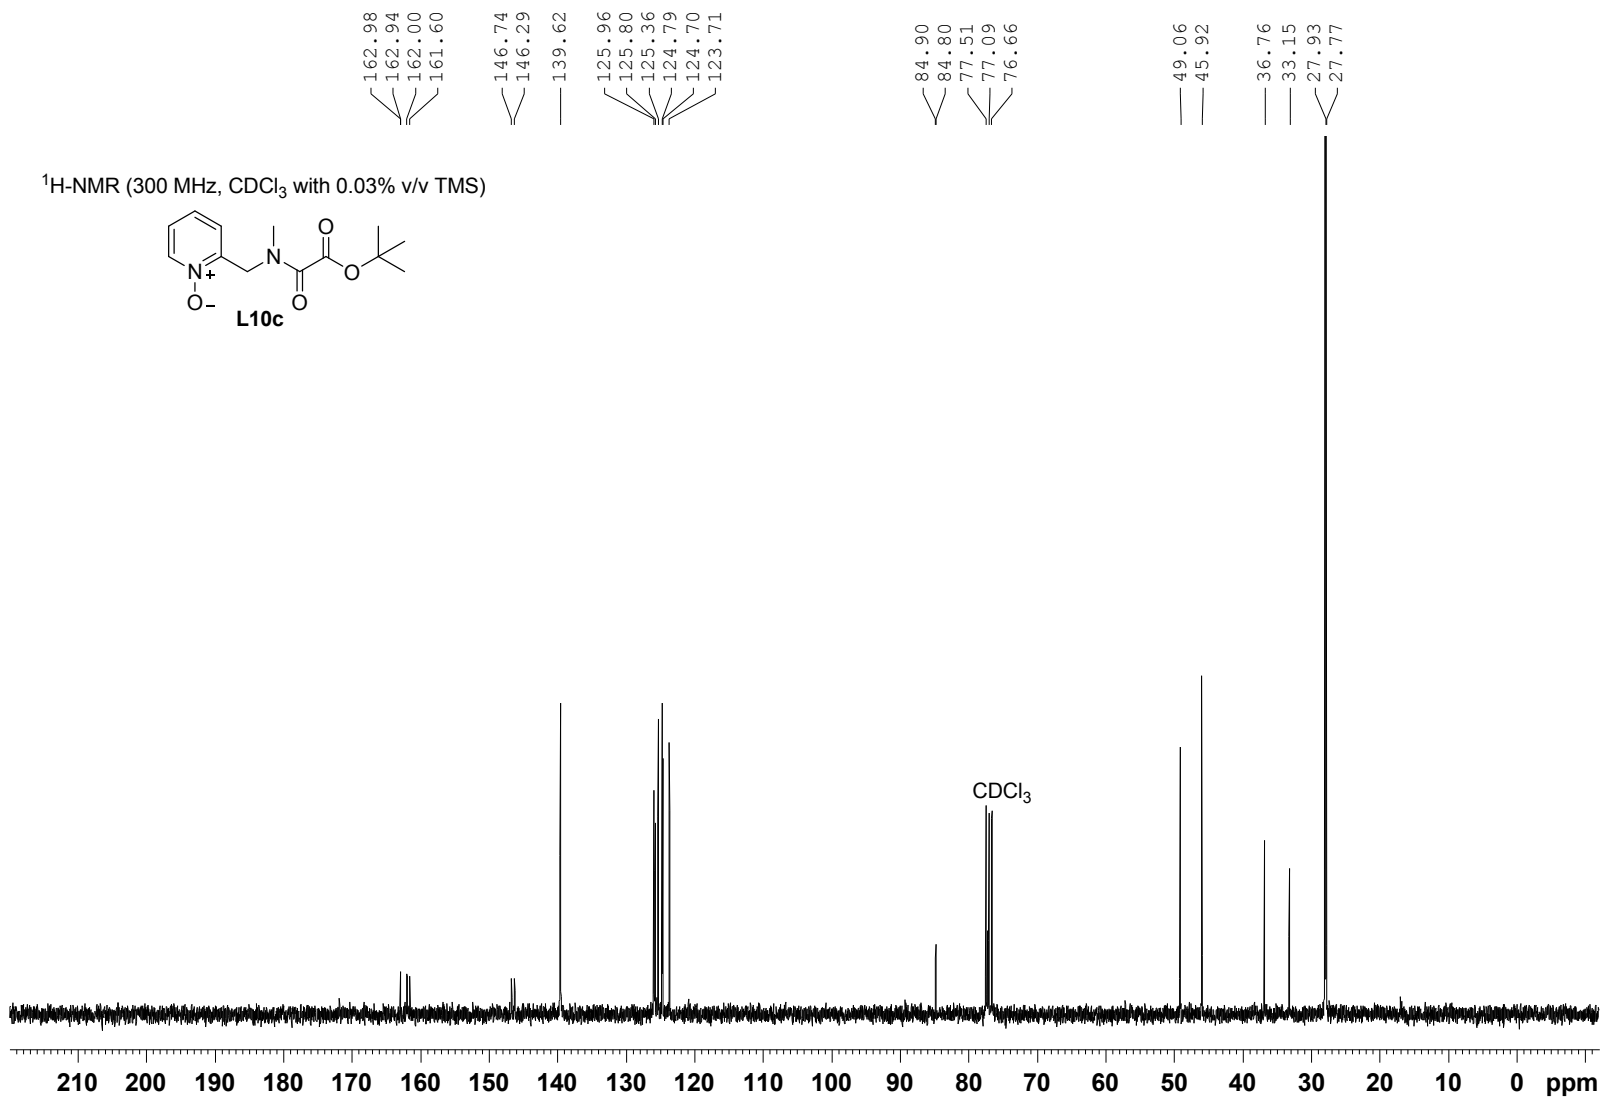

<sup>1</sup>H-NMR (300 MHz, DMSO-d<sub>6</sub> with 0.03% v/v TMS)

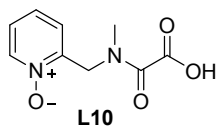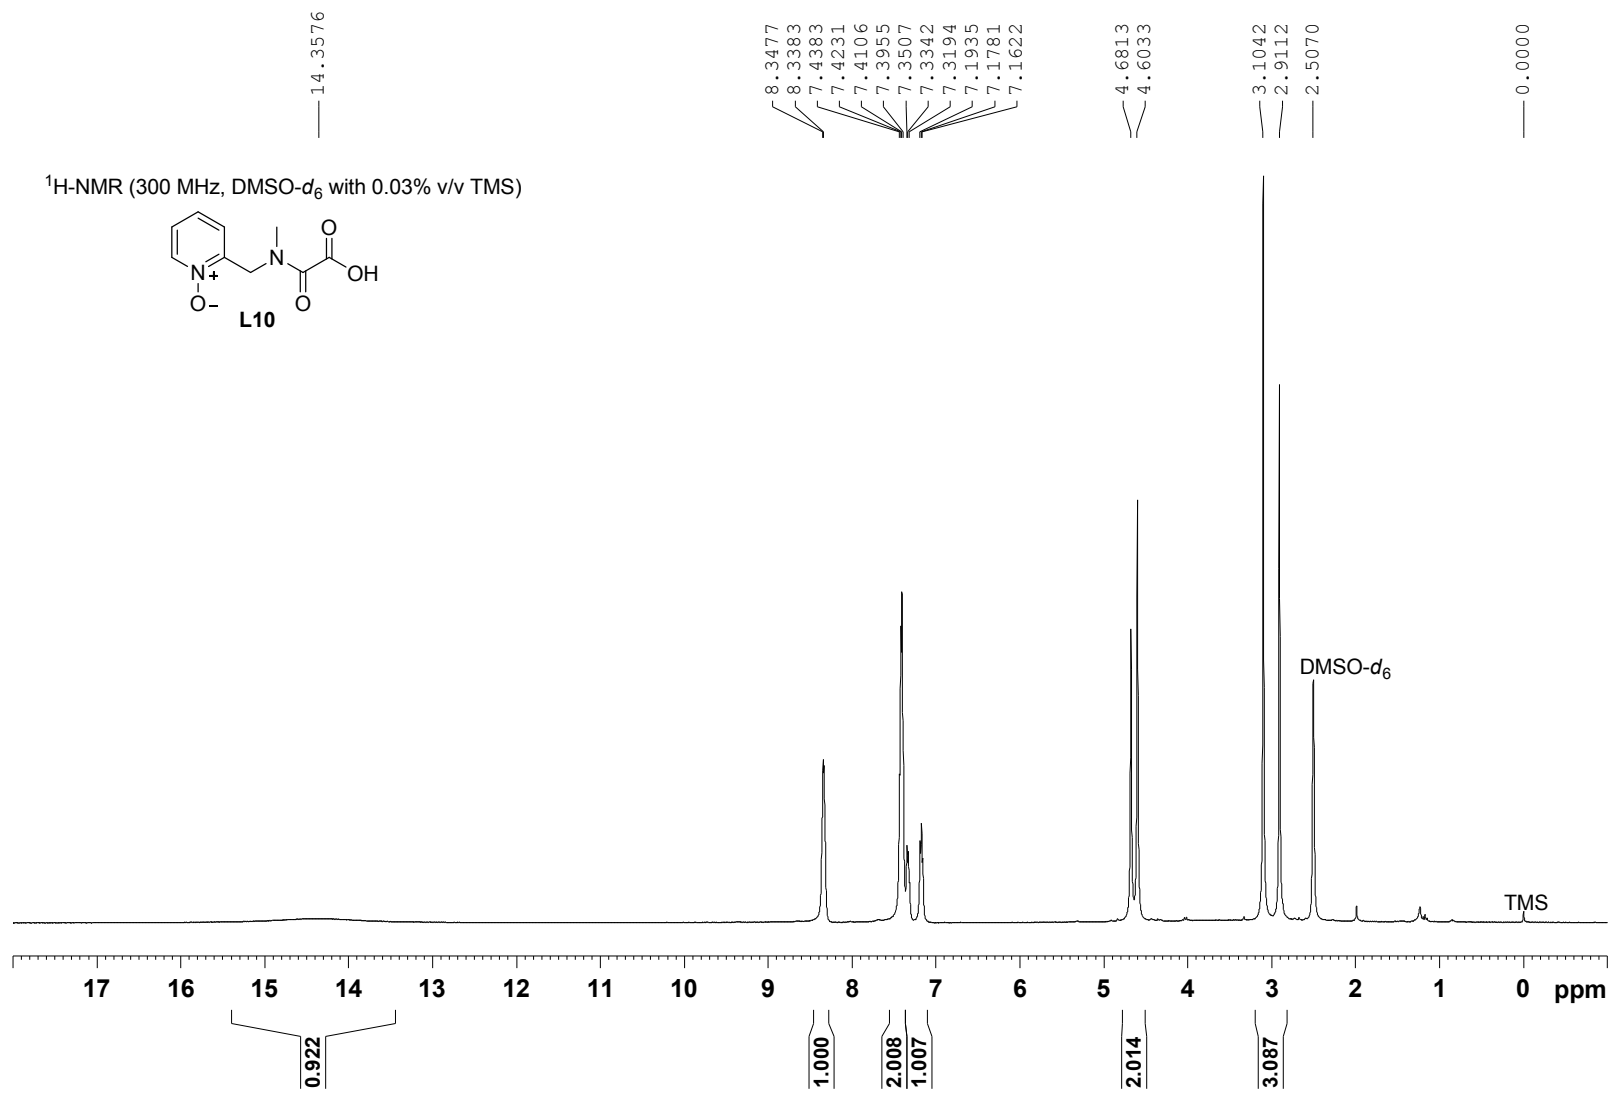

164.47  
164.13  
163.50  
163.39

145.88  
145.52  
139.33  
139.16

125.59  
125.38  
125.25  
125.03  
124.26  
123.55

48.51  
45.35  
40.27  
39.99  
39.72  
39.44  
39.16  
38.88  
38.61  
35.99  
32.34

<sup>13</sup>C-NMR (300 MHz, DMSO-*d*<sub>6</sub> with 0.03% v/v TMS)

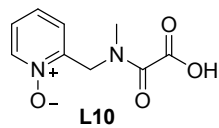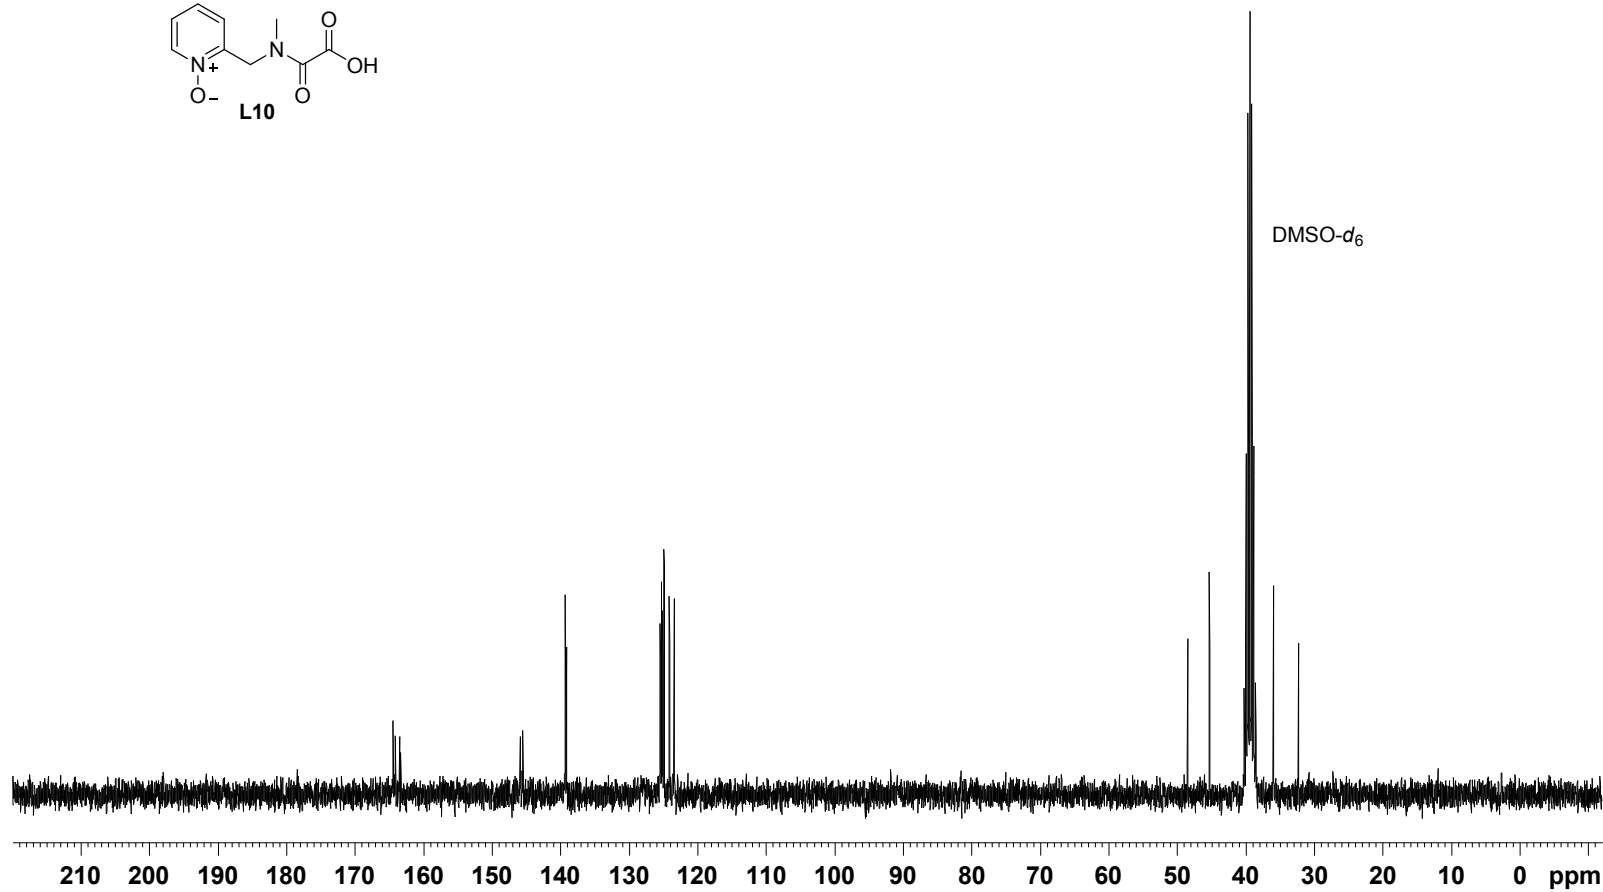



<sup>1</sup>H-NMR (300 MHz, CDCl<sub>3</sub> with 0.03% v/v TMS)

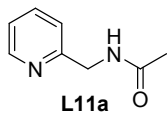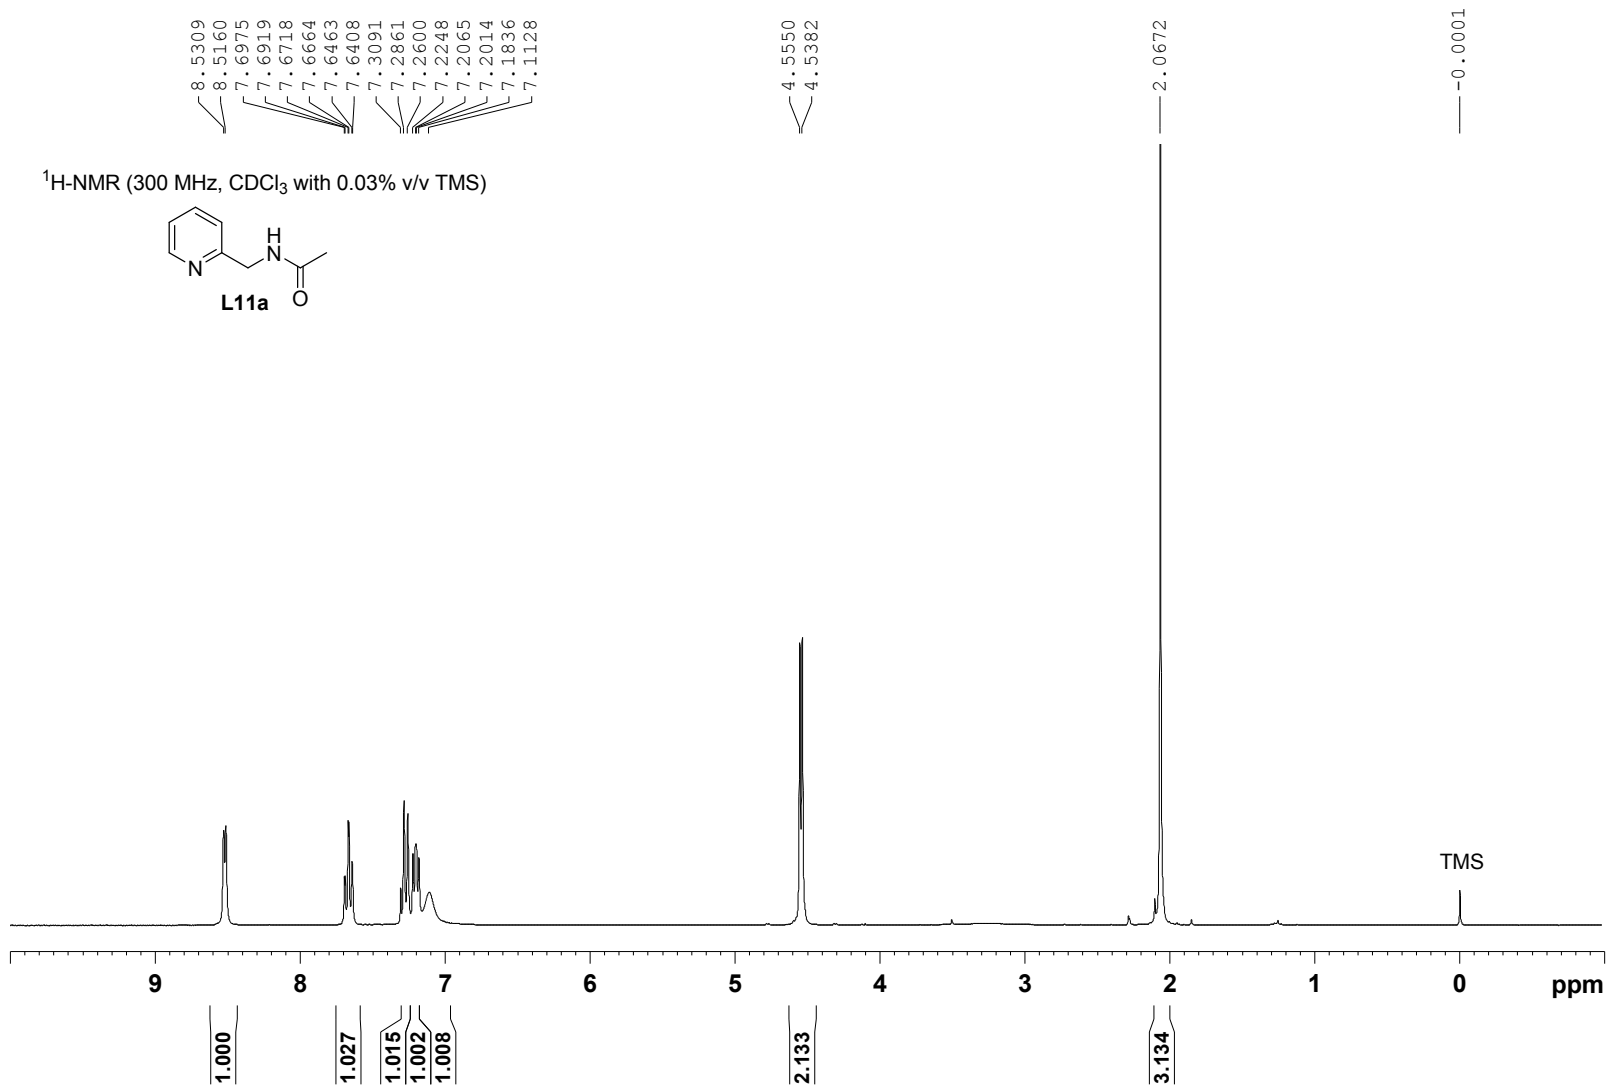

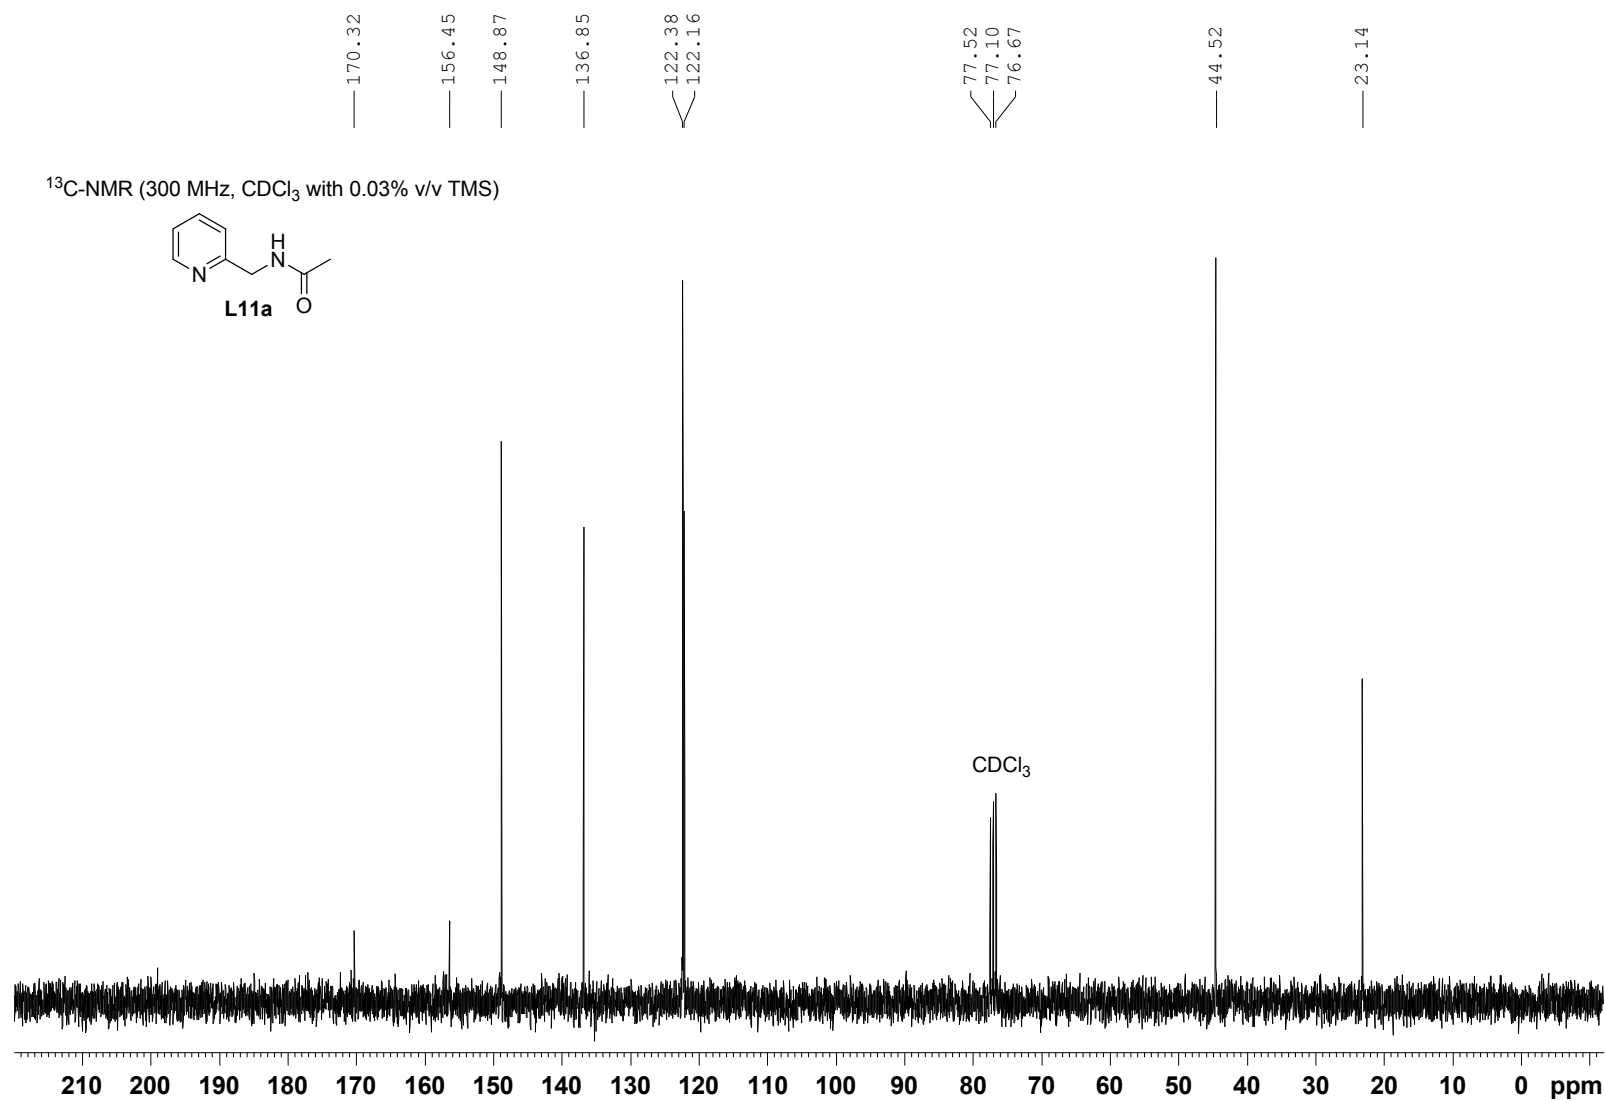

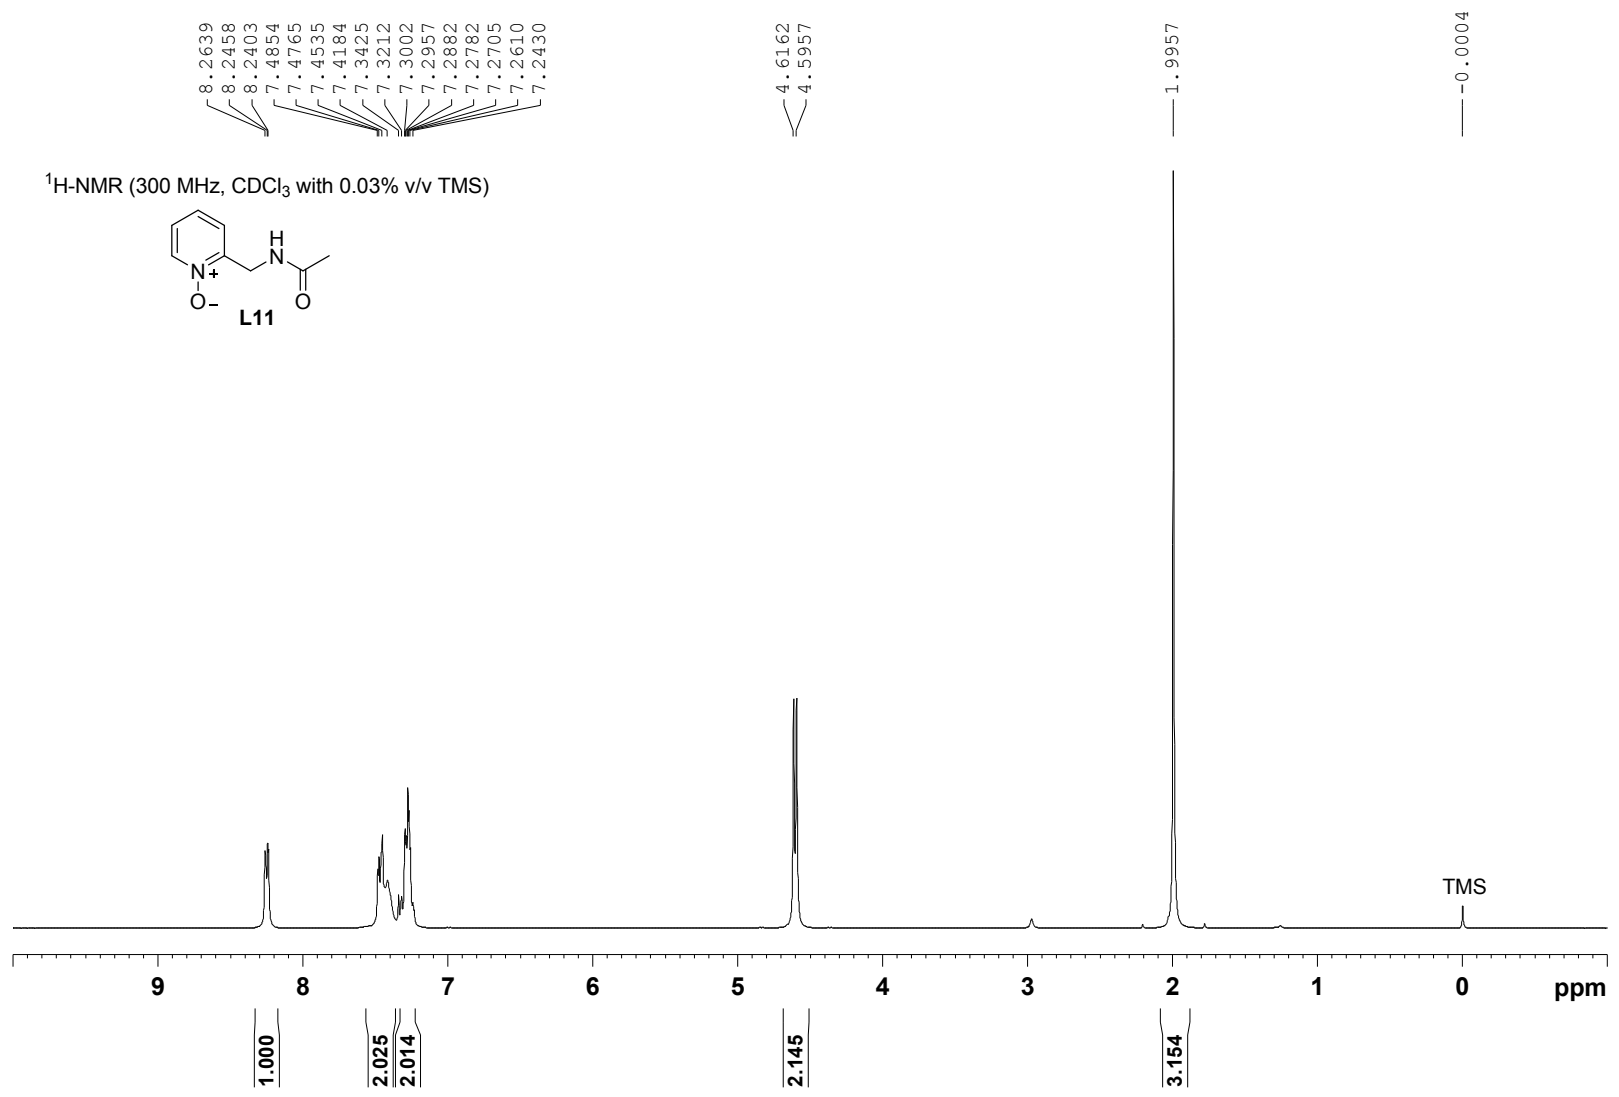

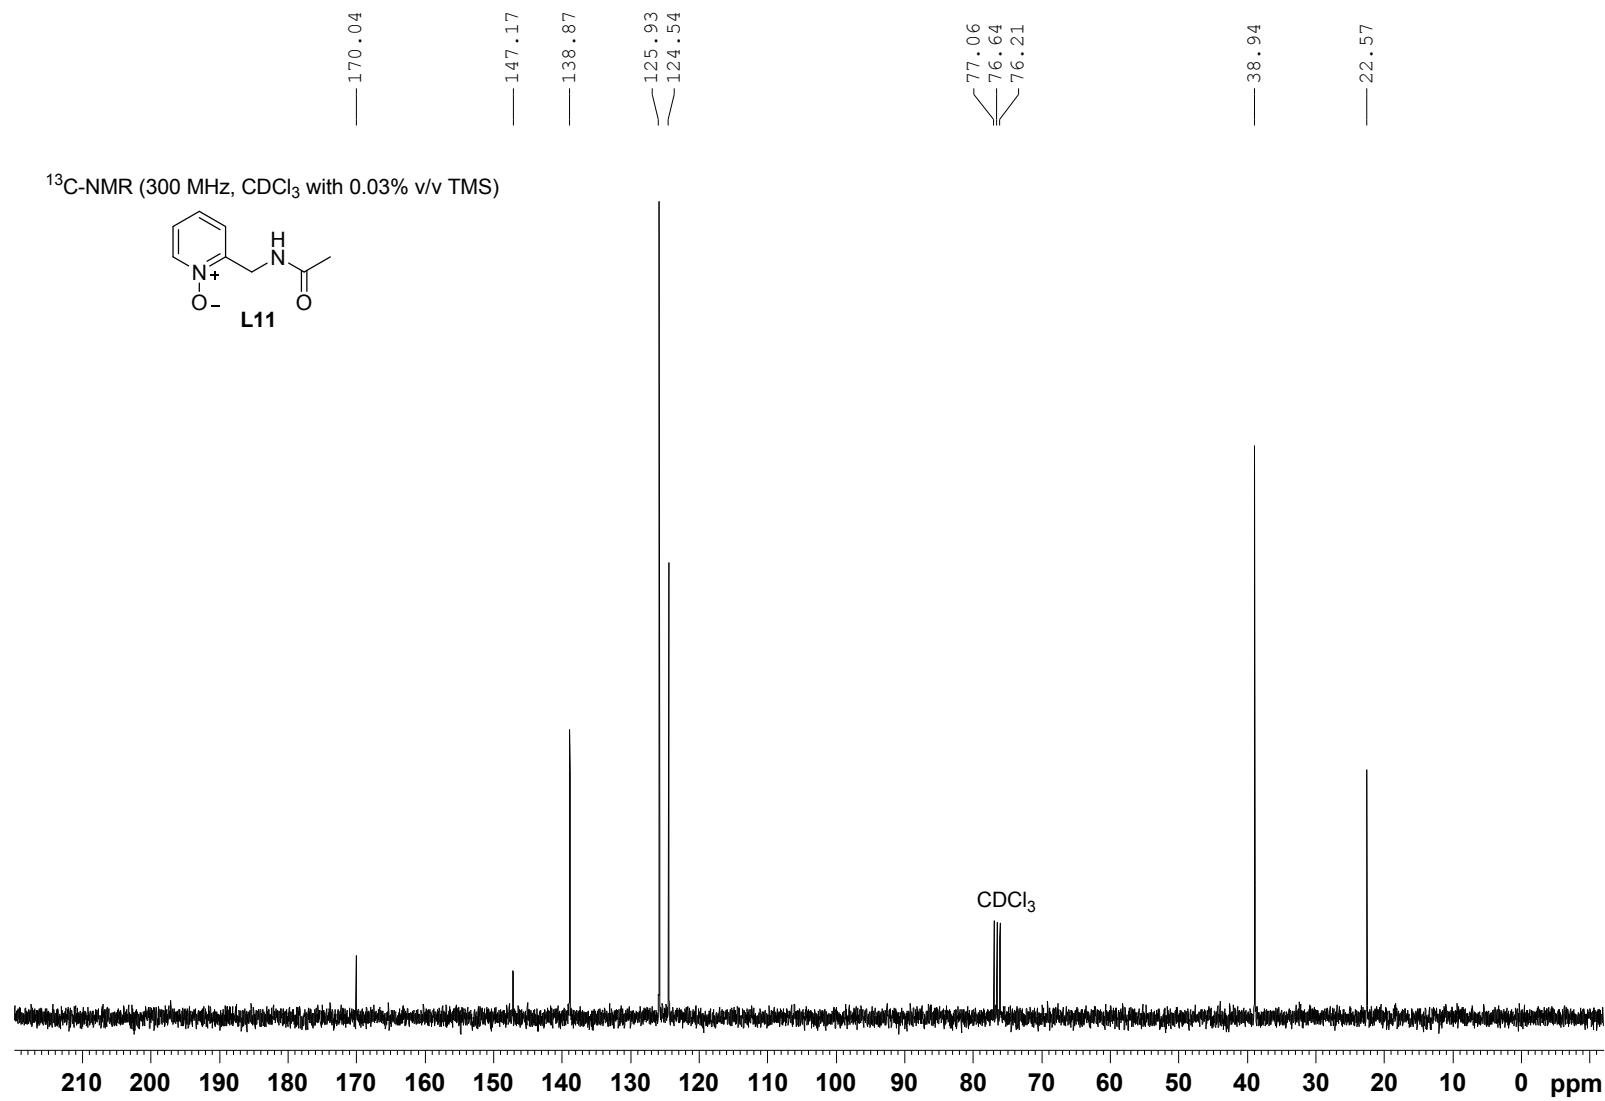

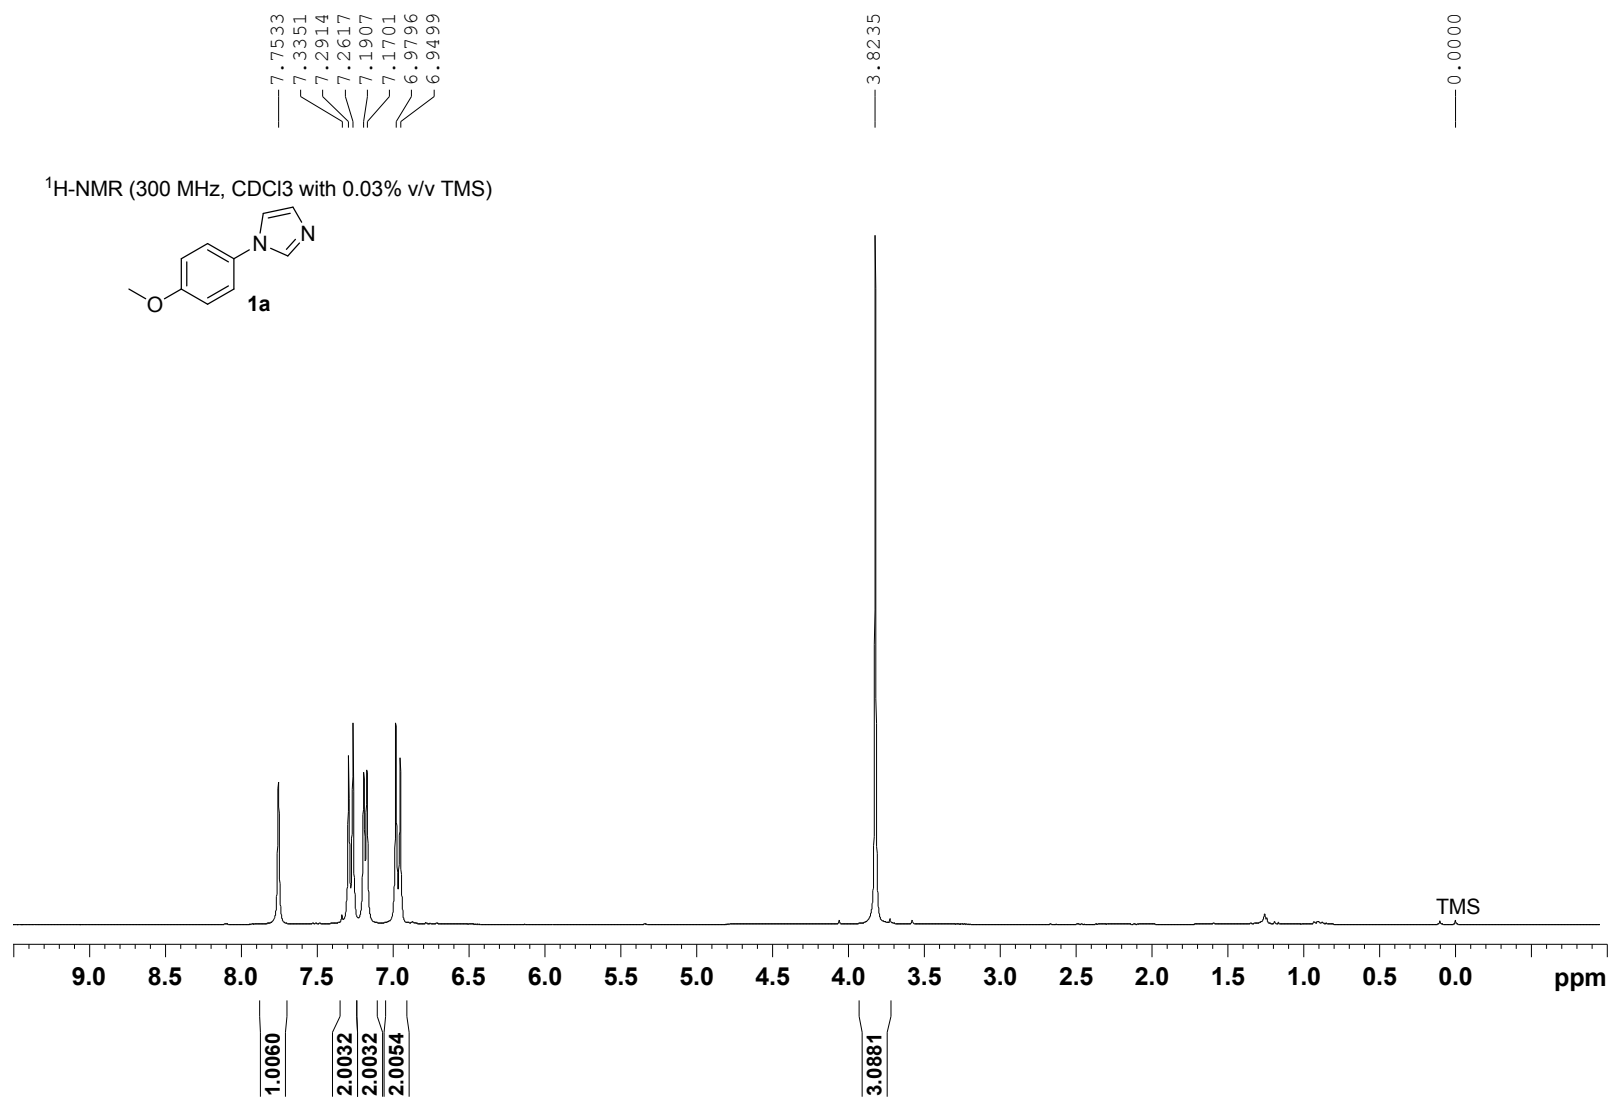

<sup>13</sup>C-NMR (300 MHz, CDCl<sub>3</sub> with 0.03% v/v TMS)

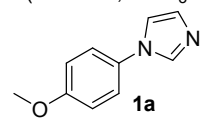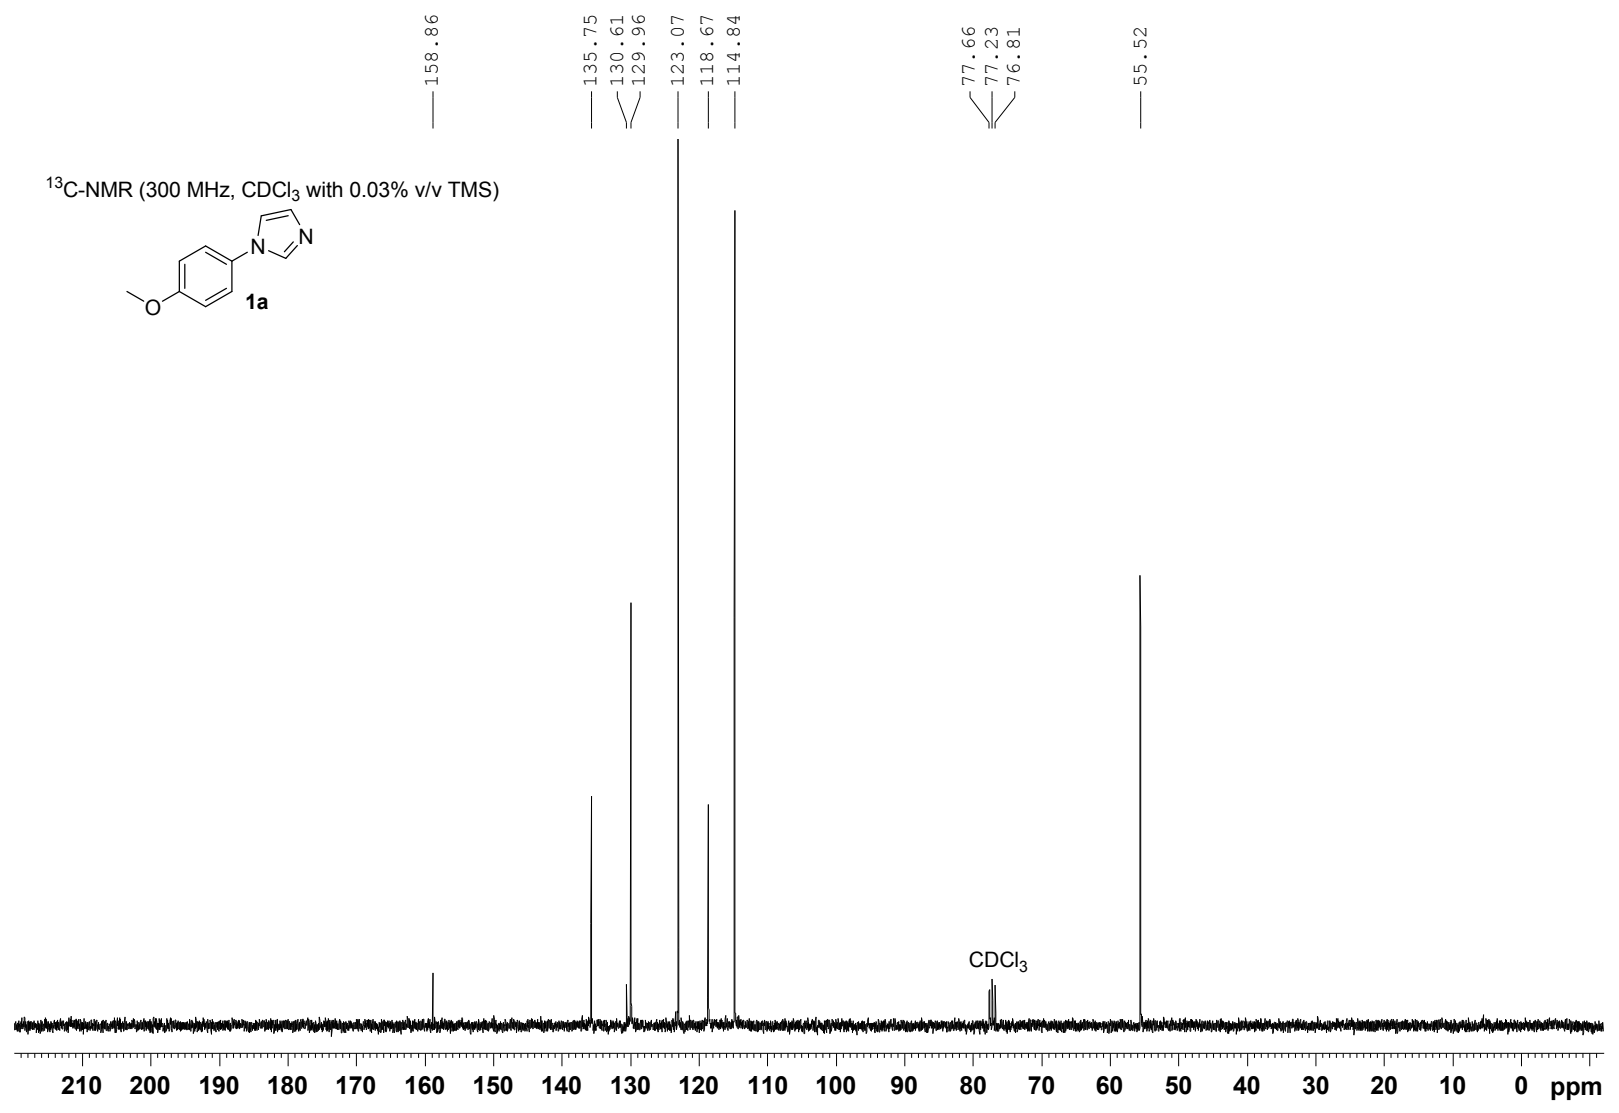

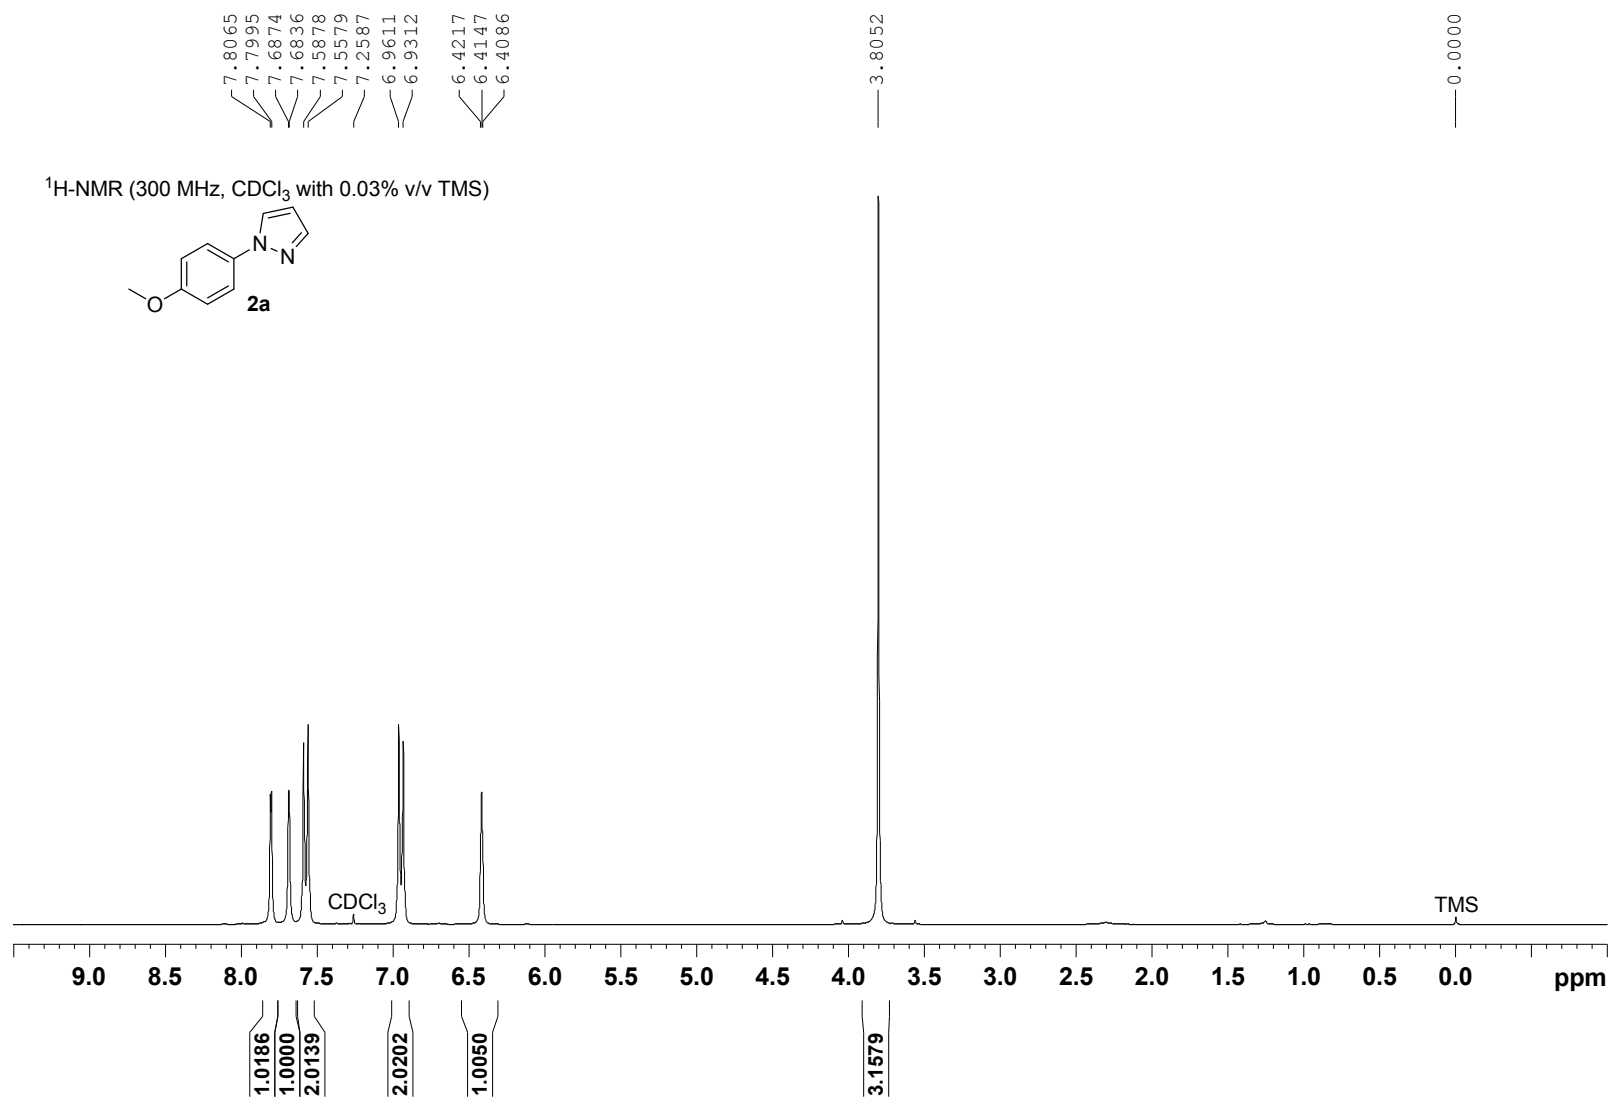

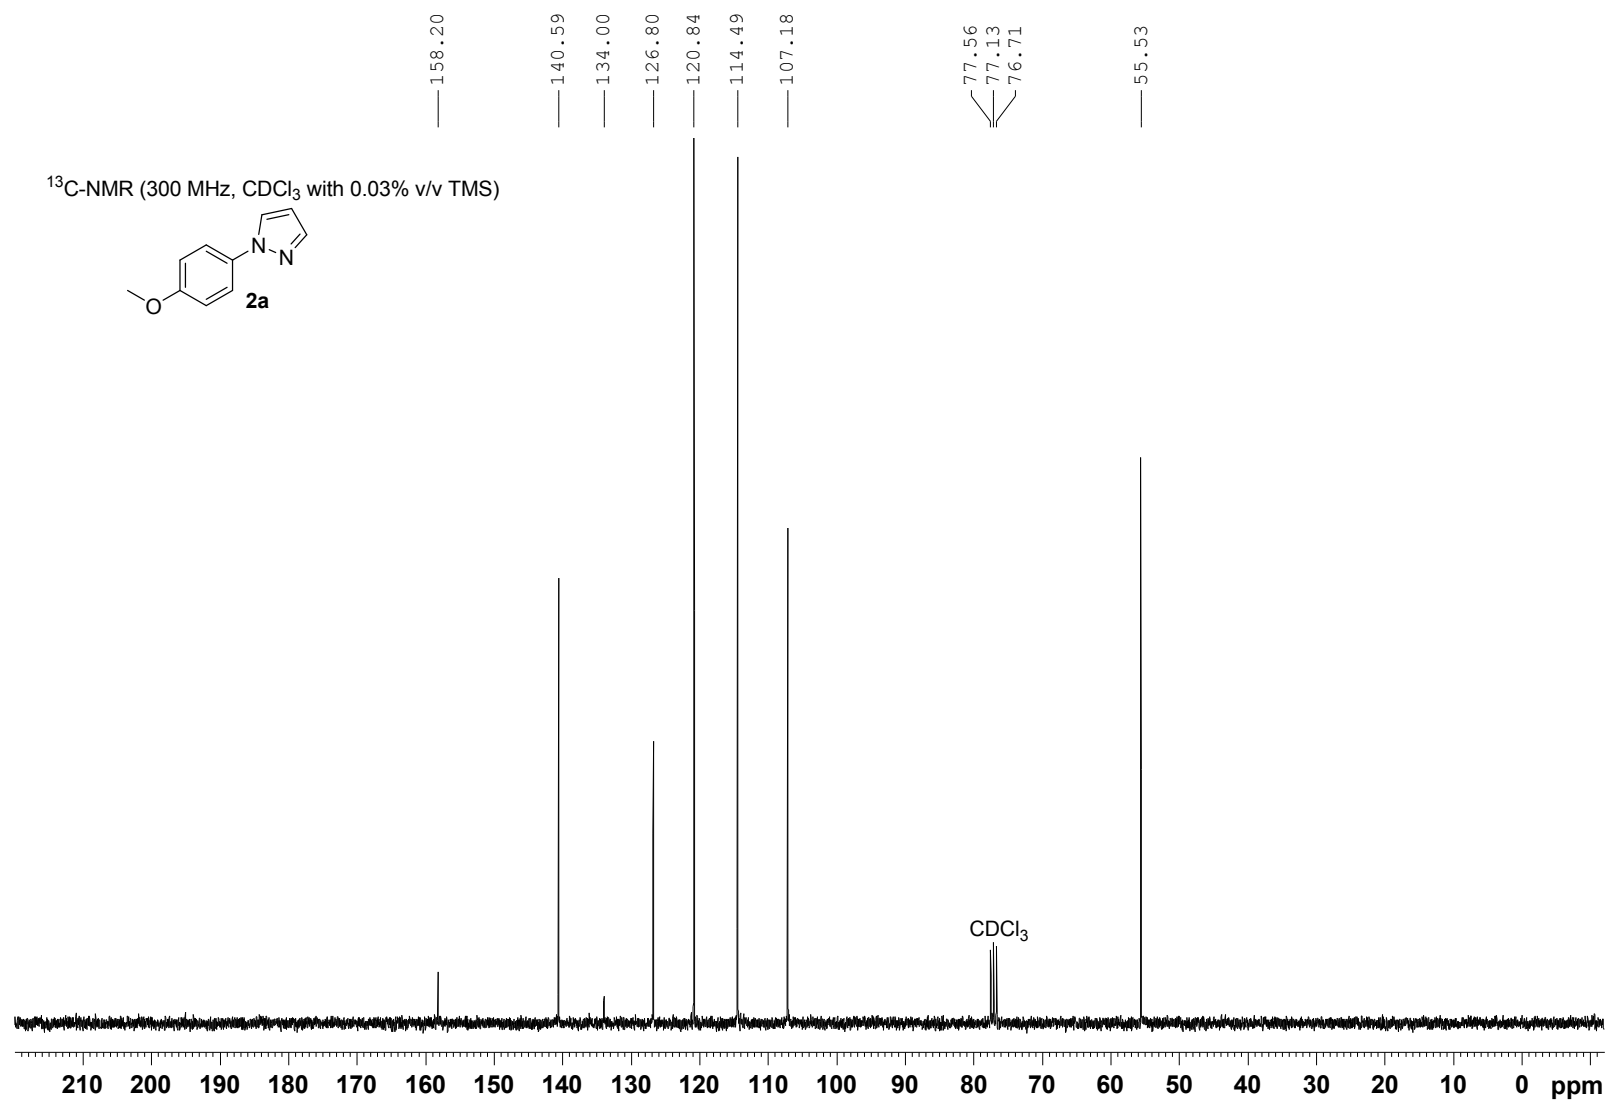



<sup>1</sup>H-NMR (300 MHz, CDCl<sub>3</sub> with 0.03% v/v TMS)

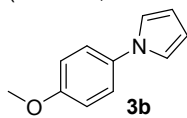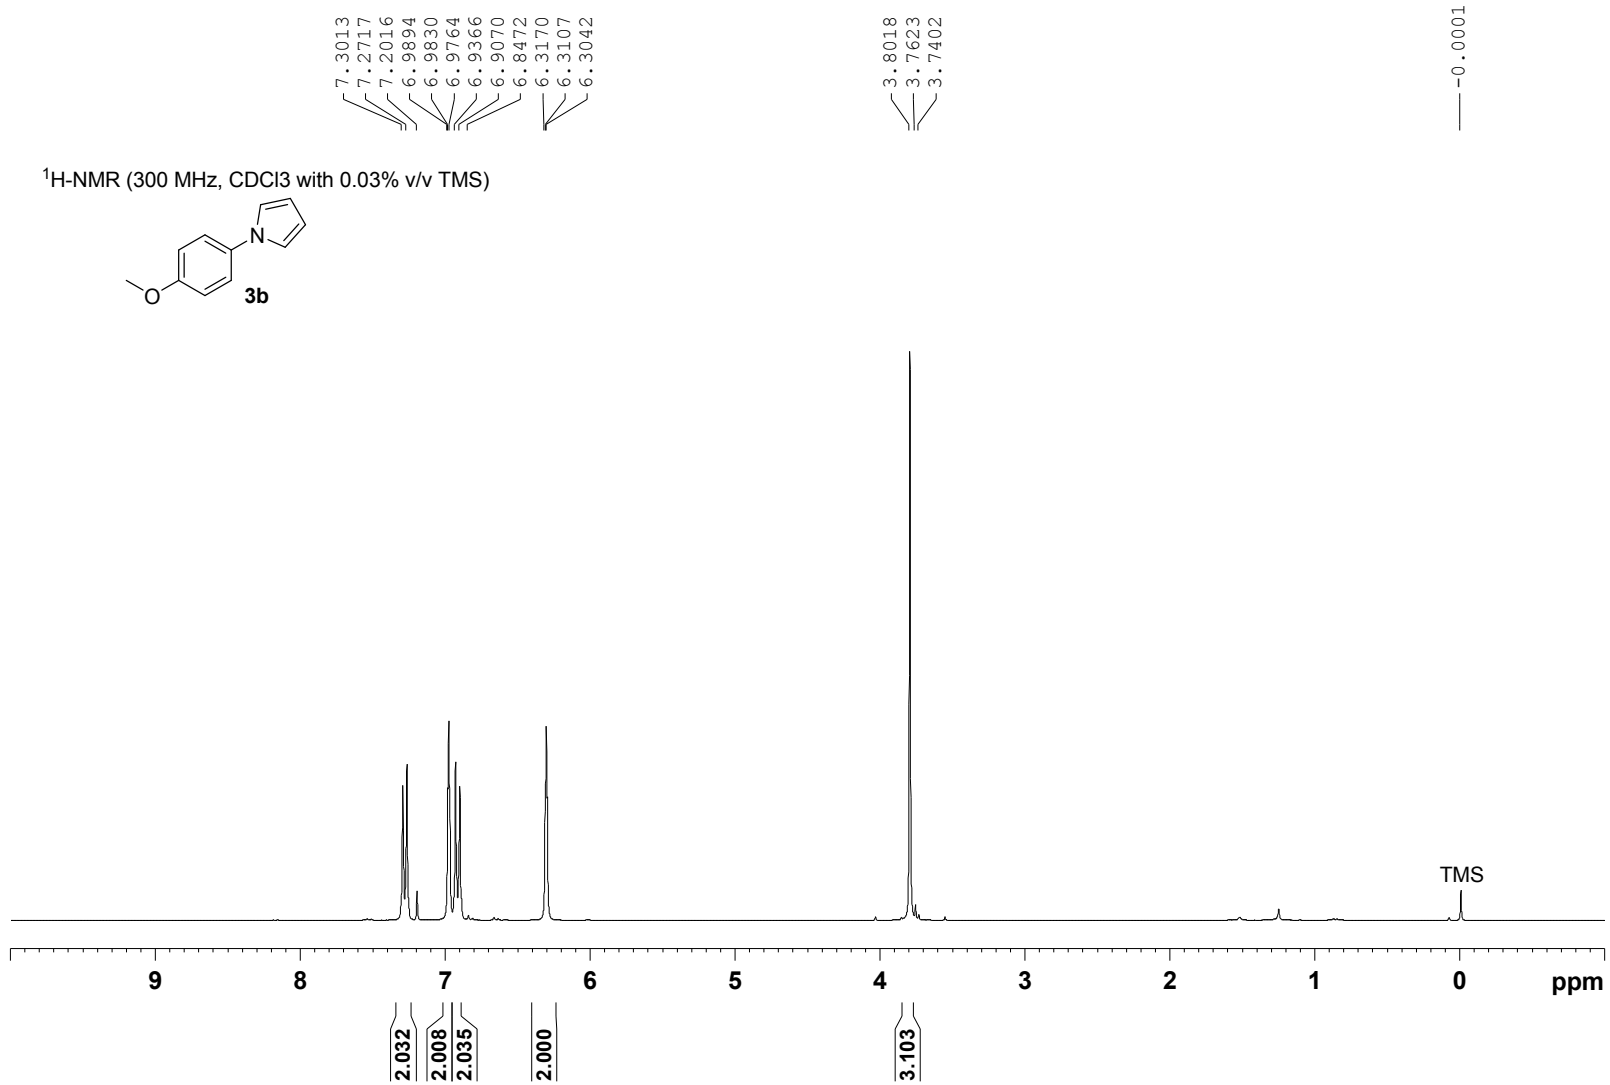

<sup>13</sup>C-NMR (300 MHz, CDCl<sub>3</sub> with 0.03% v/v TMS)

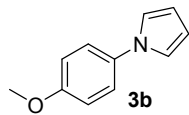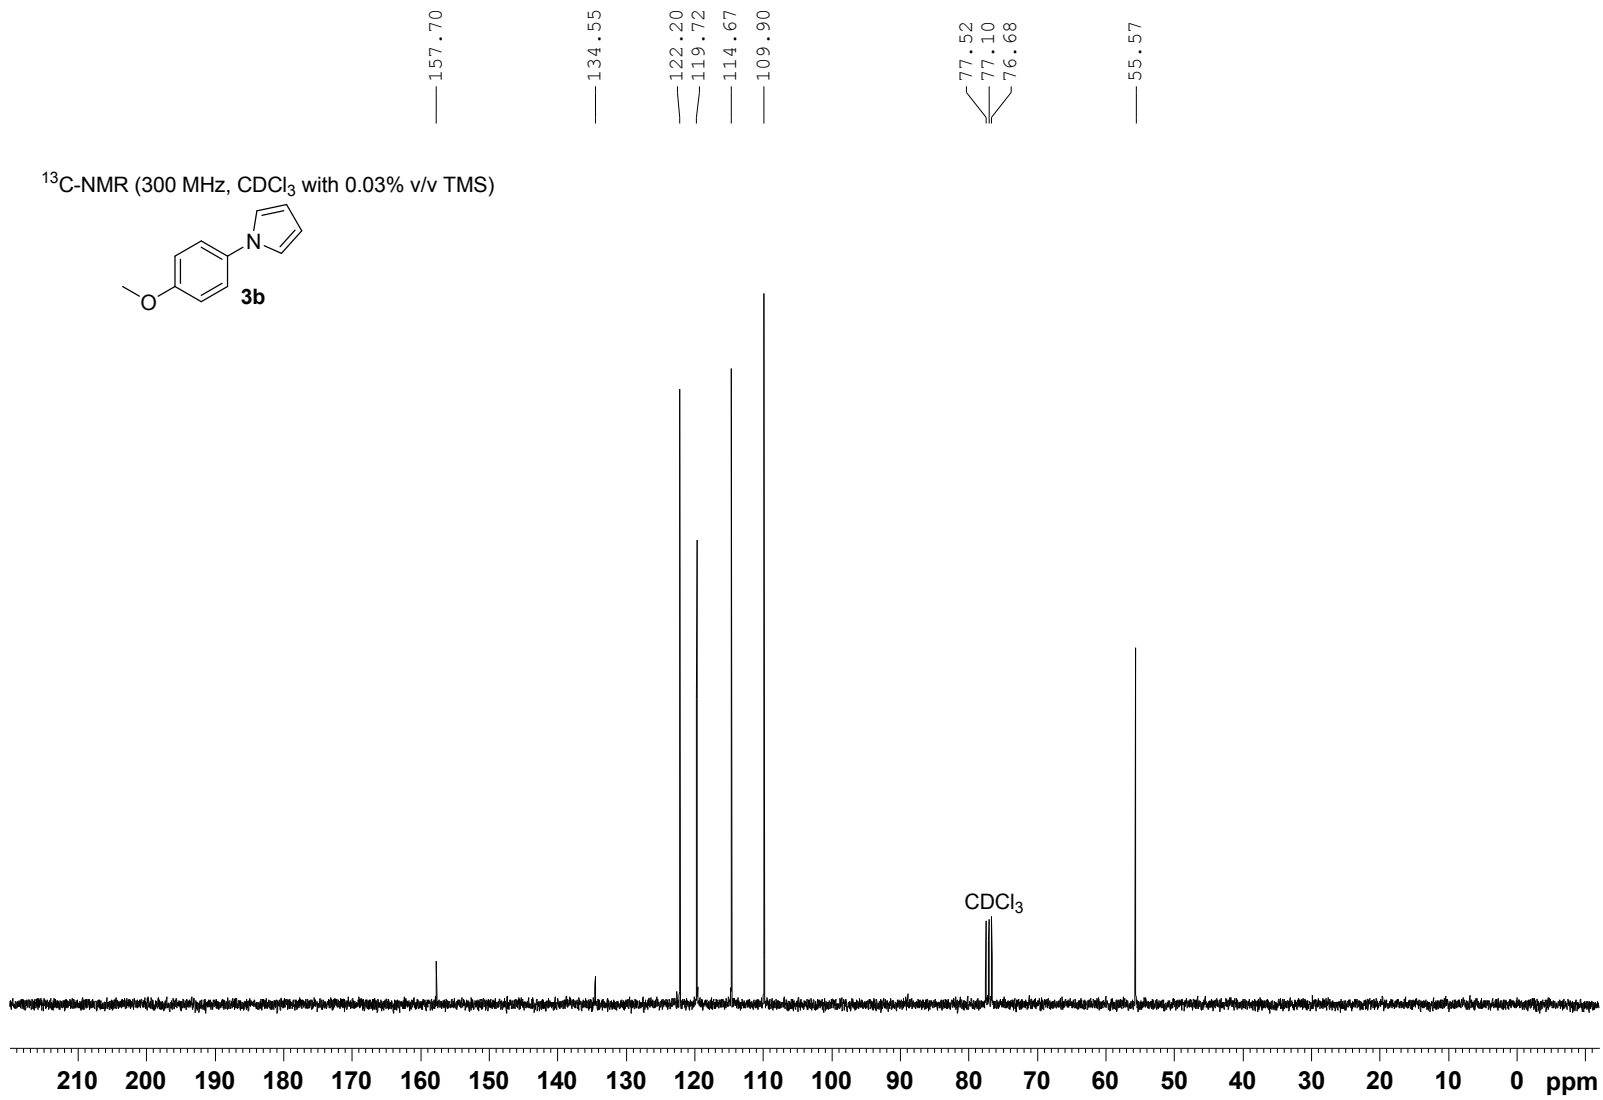

<sup>1</sup>H-NMR (300 MHz, CDCl<sub>3</sub> with 0.03% v/v TMS)

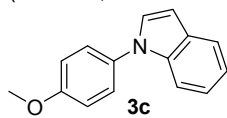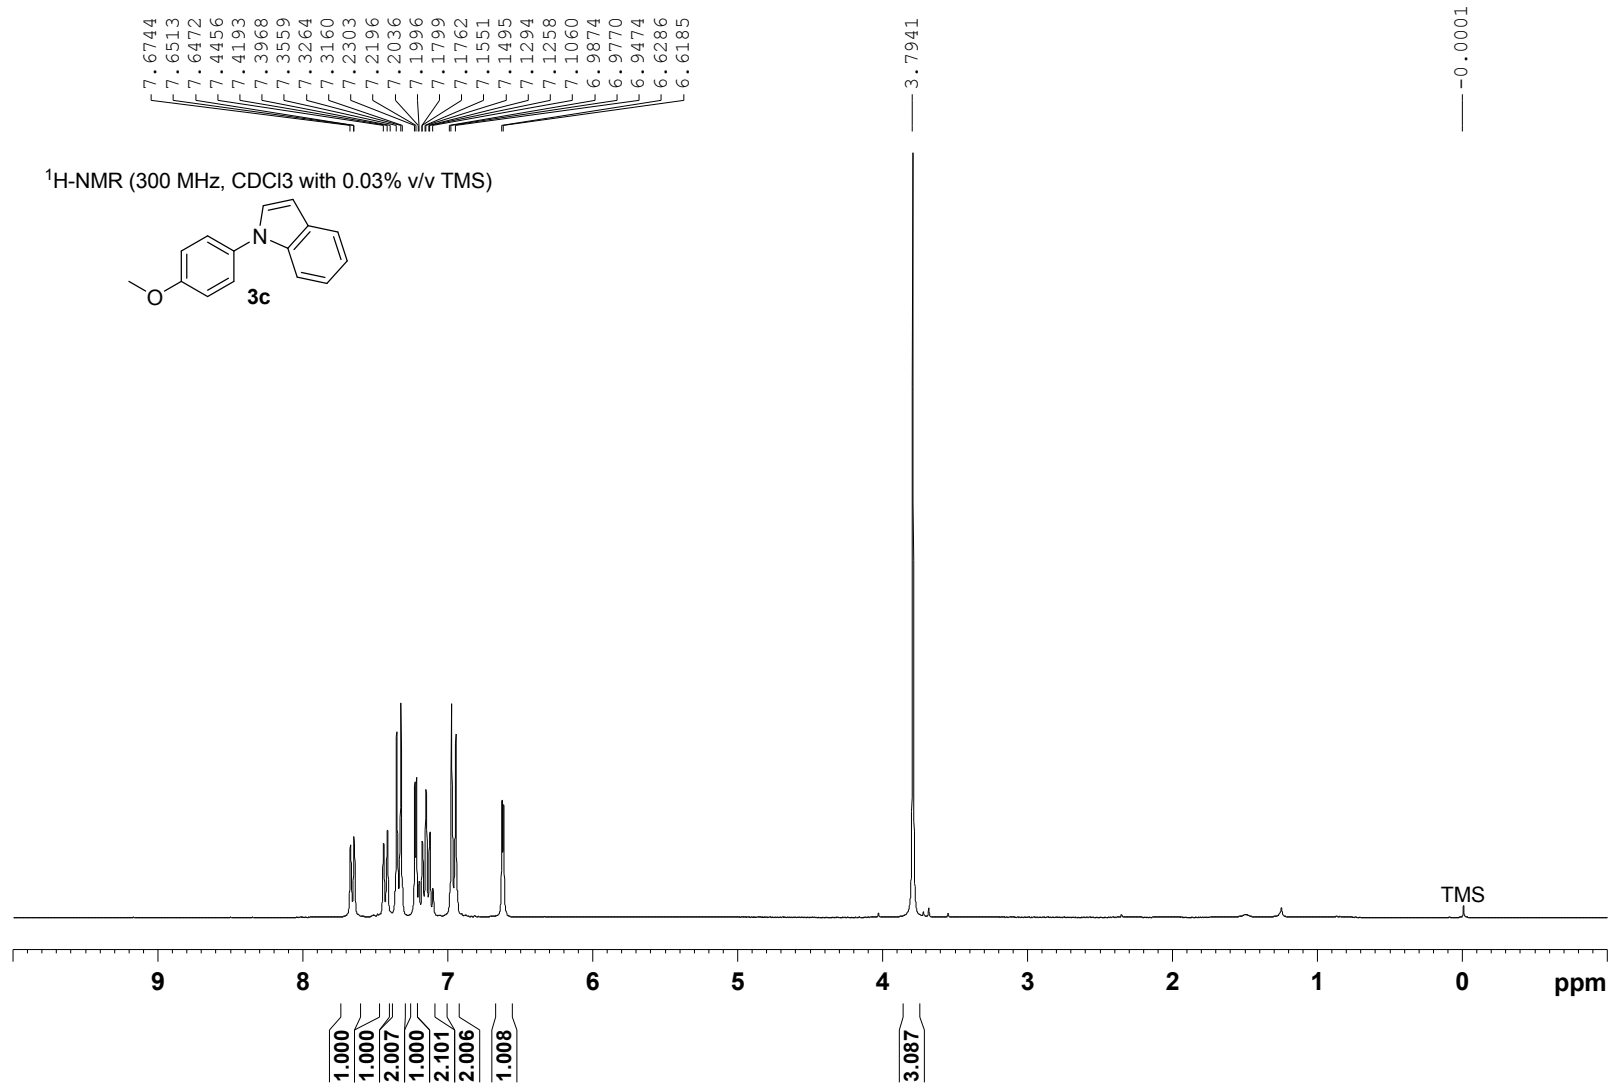

<sup>13</sup>C-NMR (300 MHz, CDCl<sub>3</sub> with 0.03% v/v TMS)

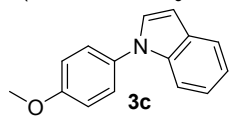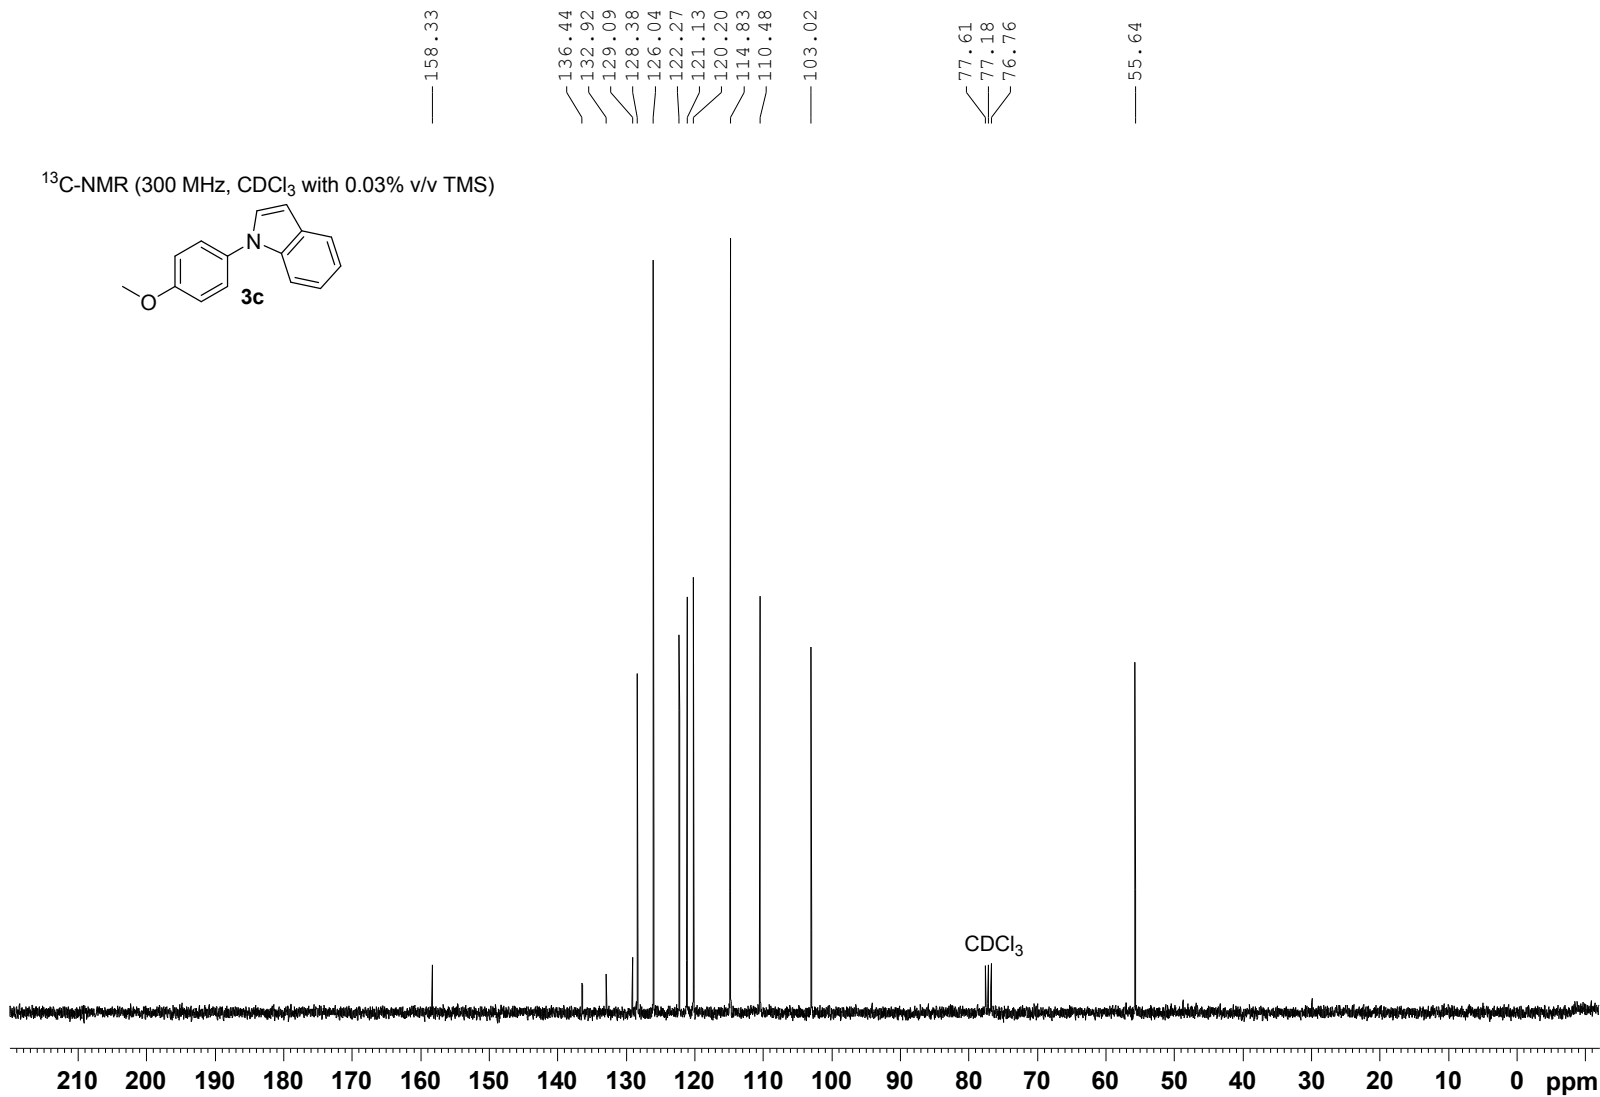

8.1037  
7.9092  
7.8958  
7.8885  
7.8849  
7.8809  
7.8664  
7.5788  
7.5532  
7.5355  
7.5276  
7.5093  
7.4948  
7.4695  
7.4412  
7.4176  
7.3568  
7.3390  
7.3336  
7.3215  
7.3090  
7.2861  
7.2592

— 0.0001

<sup>1</sup>H-NMR (300 MHz, CDCl<sub>3</sub> with 0.03% v/v TMS)

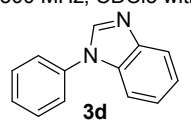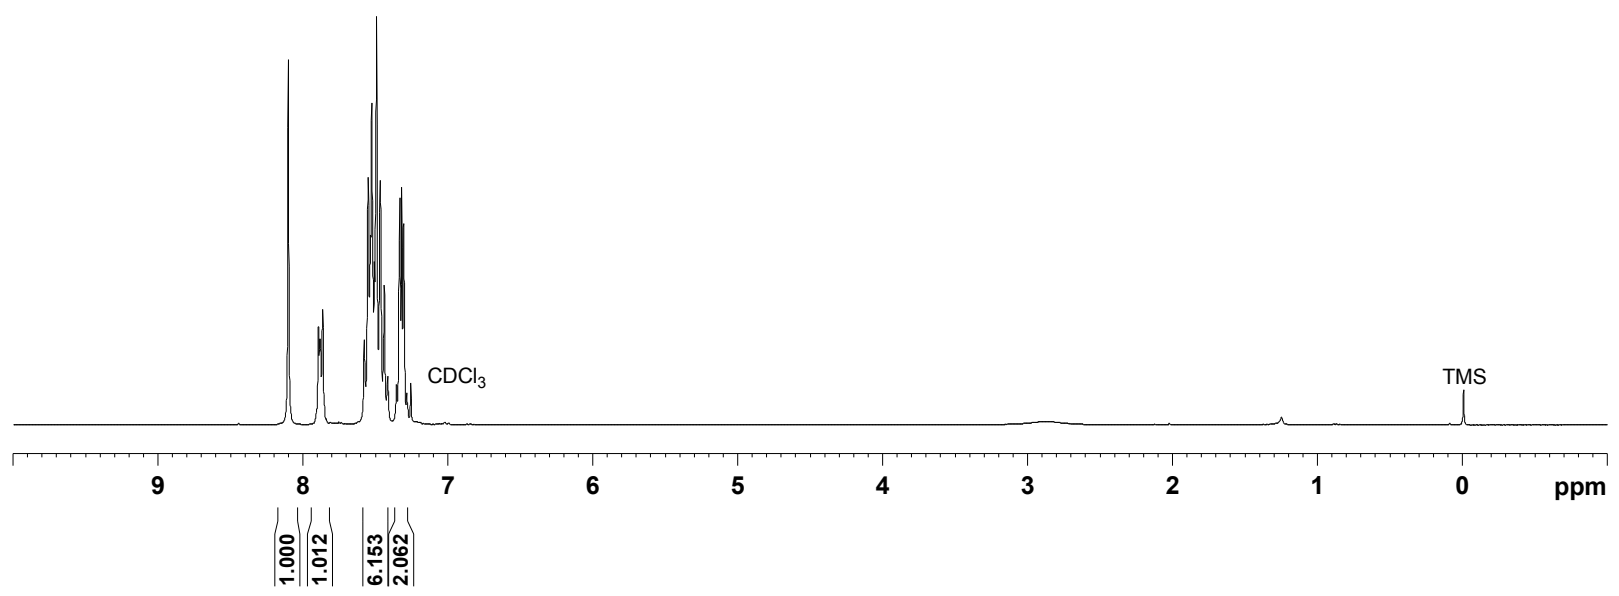

<sup>13</sup>C-NMR (300 MHz, CDCl<sub>3</sub> with 0.03% v/v TMS)

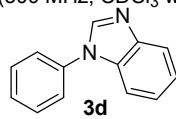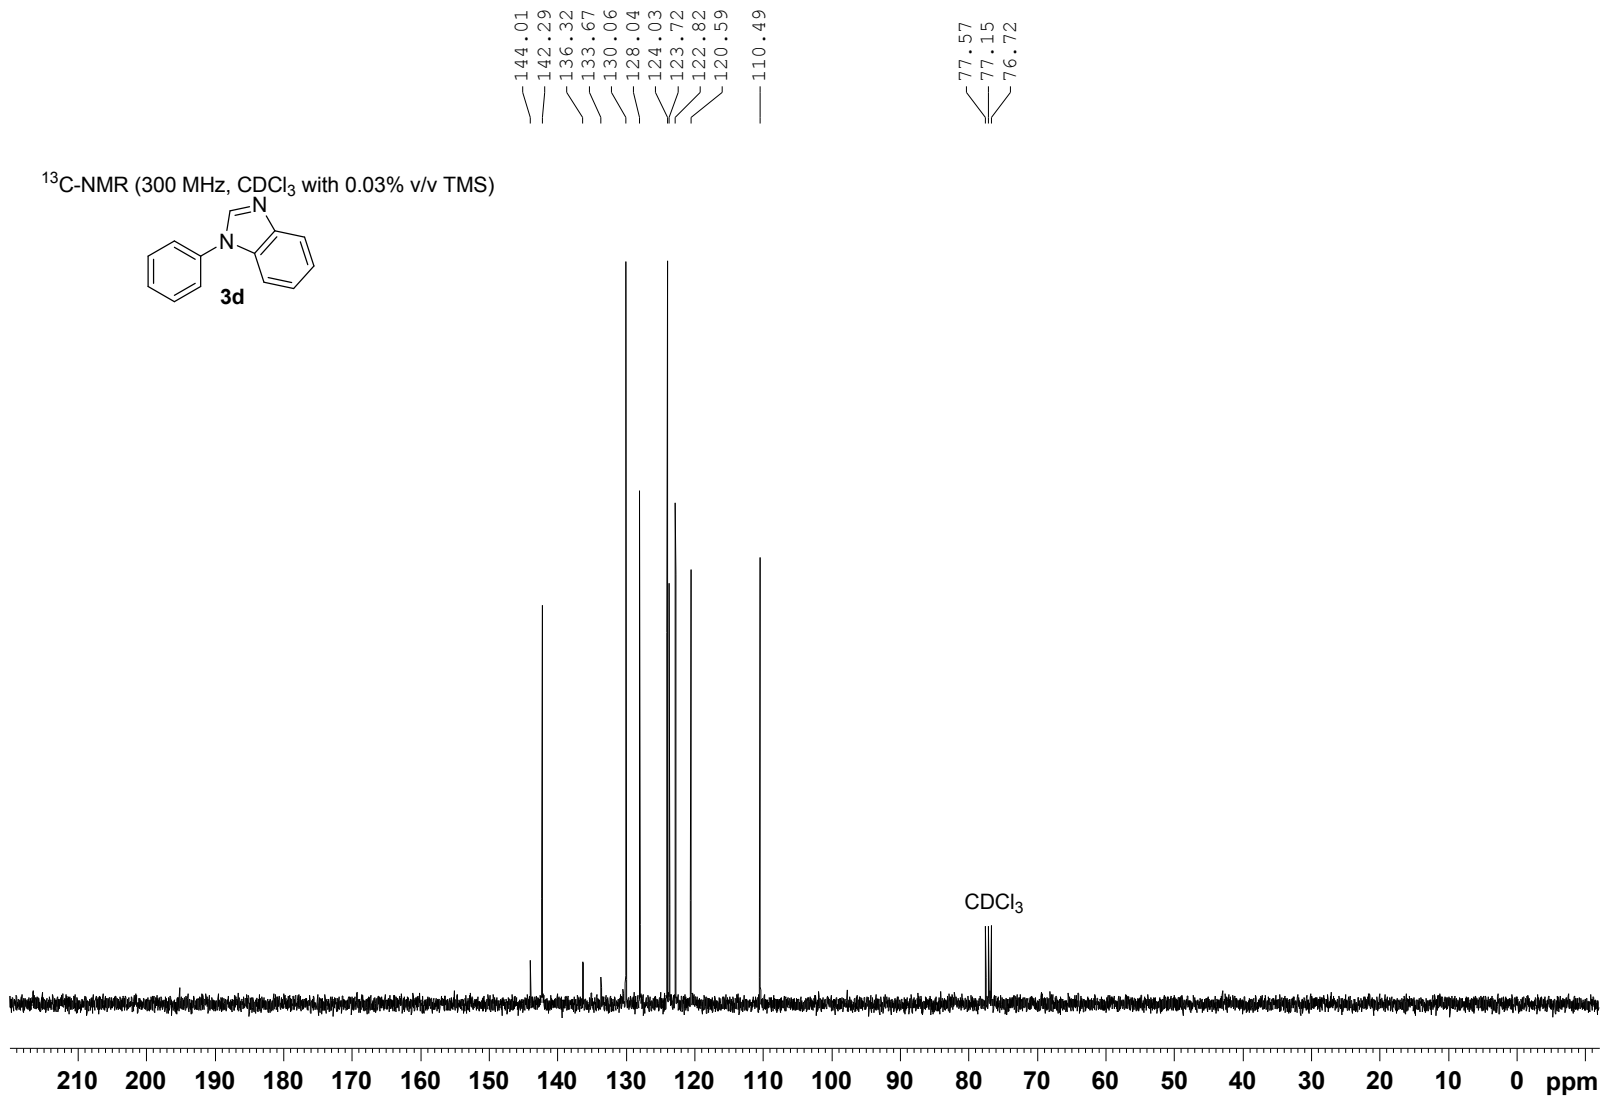

7.5564  
7.5302  
7.5062  
7.4571  
7.4391  
7.4122  
7.3907  
7.3646  
7.2199  
7.1275  
7.1181  
7.1082  
7.0998  
7.0922  
7.0829  
7.0731  
7.0572  
6.9967  
6.9699  
6.9613  
6.9523  
5.8393

— -0.0001

<sup>1</sup>H-NMR (300 MHz, CDCl<sub>3</sub> with 0.03% v/v TMS)

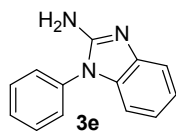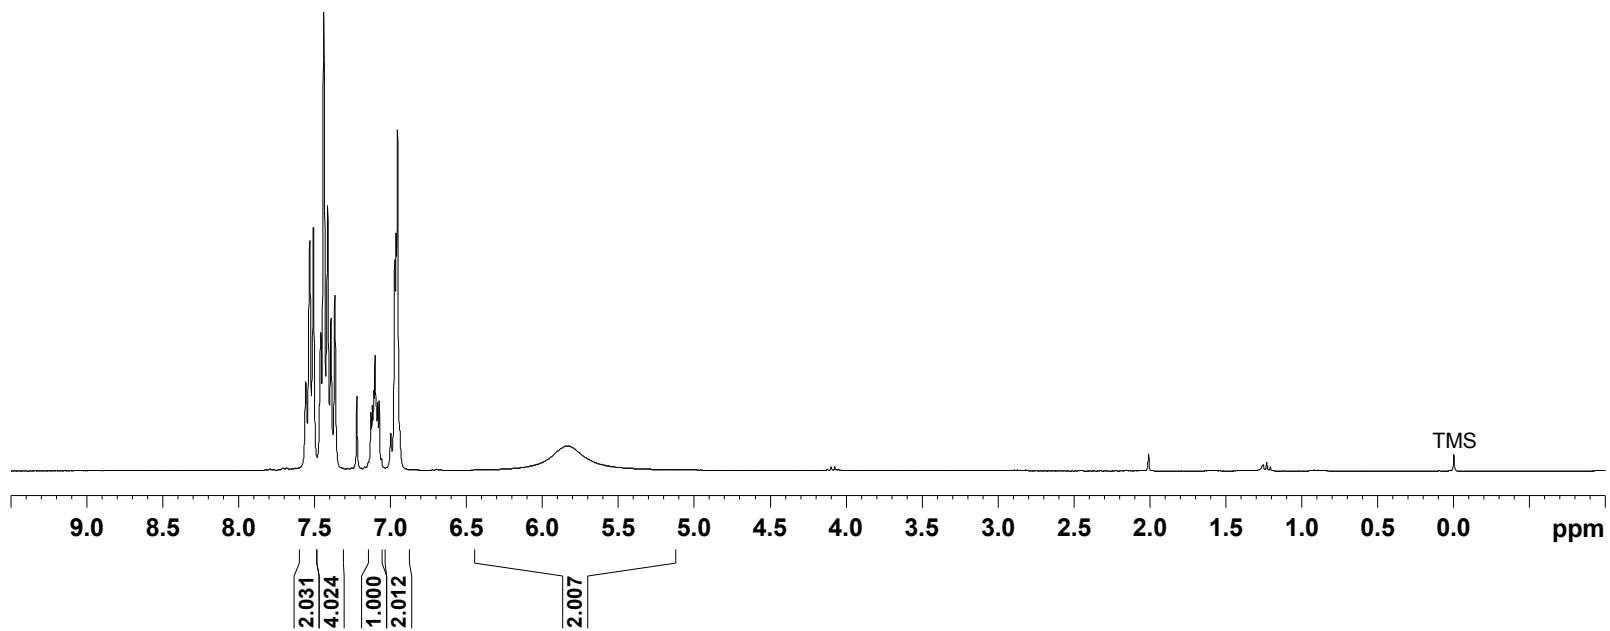

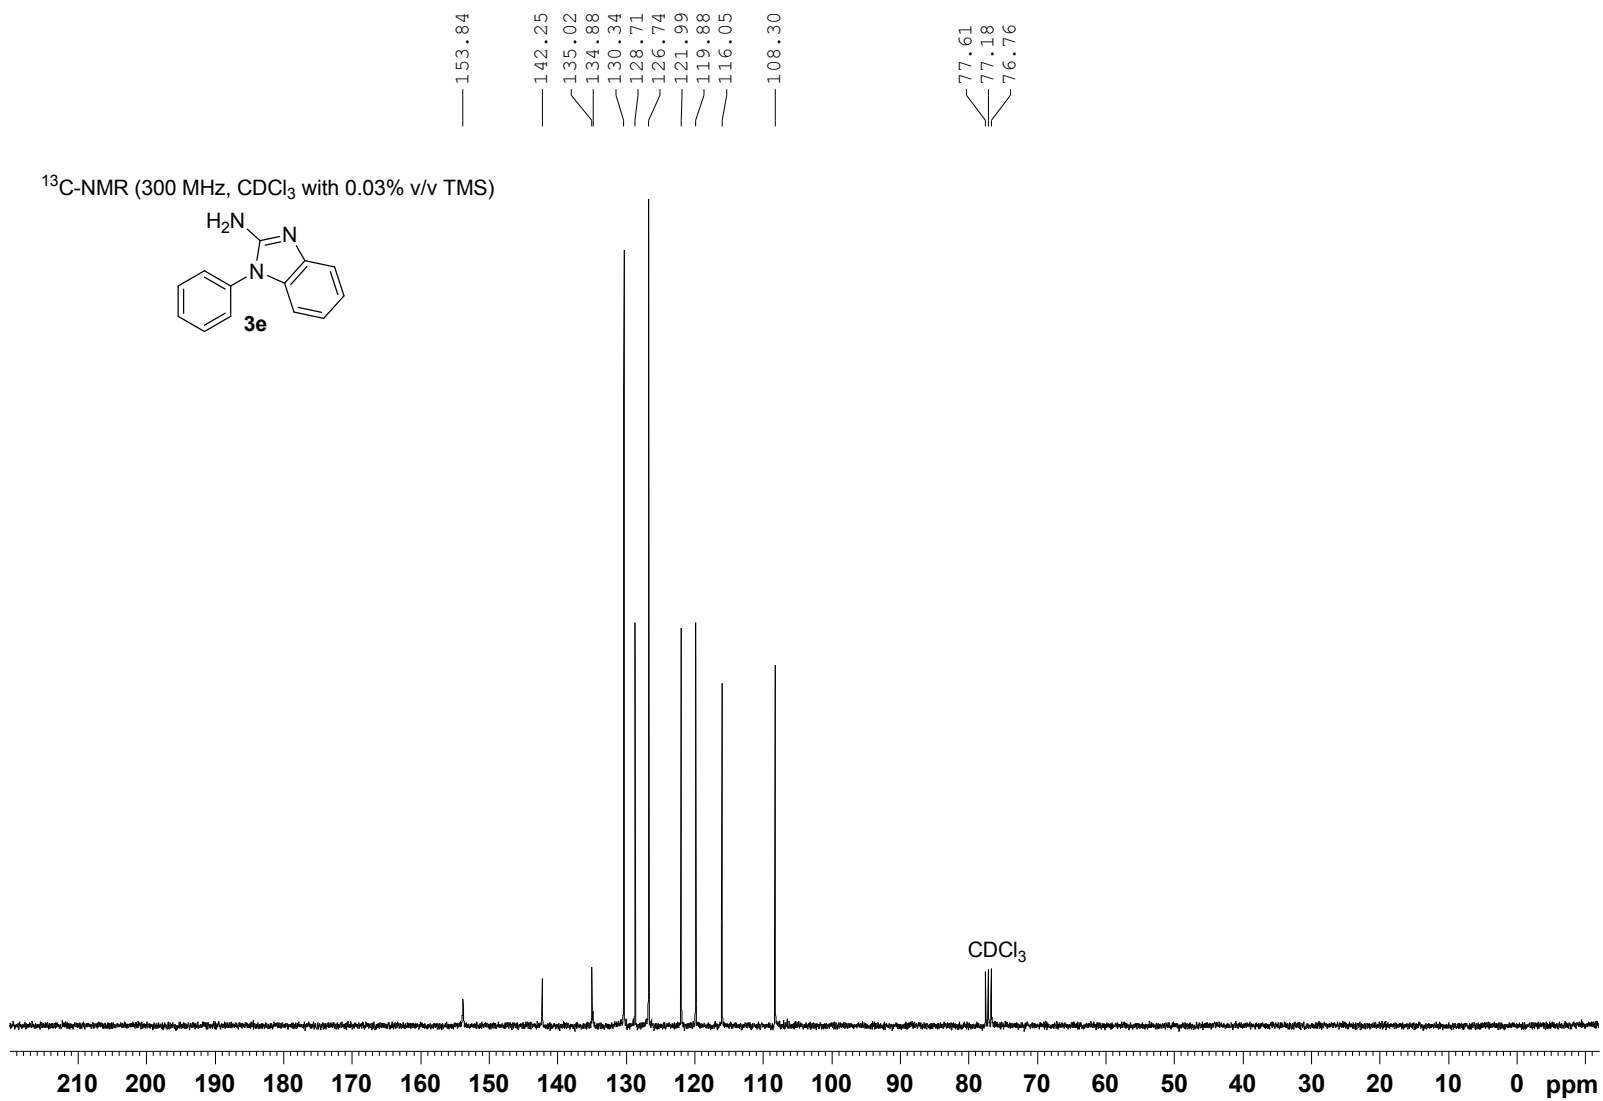



<sup>1</sup>H-NMR (300 MHz, CDCl<sub>3</sub> with 0.03% v/v TMS)

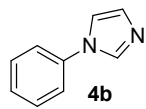

7.8559  
7.4975  
7.4922  
7.4714  
7.4693  
7.4544  
7.4464  
7.3879  
7.3599  
7.3367  
7.3328  
7.2942  
7.2770  
7.2024

— 0.0001

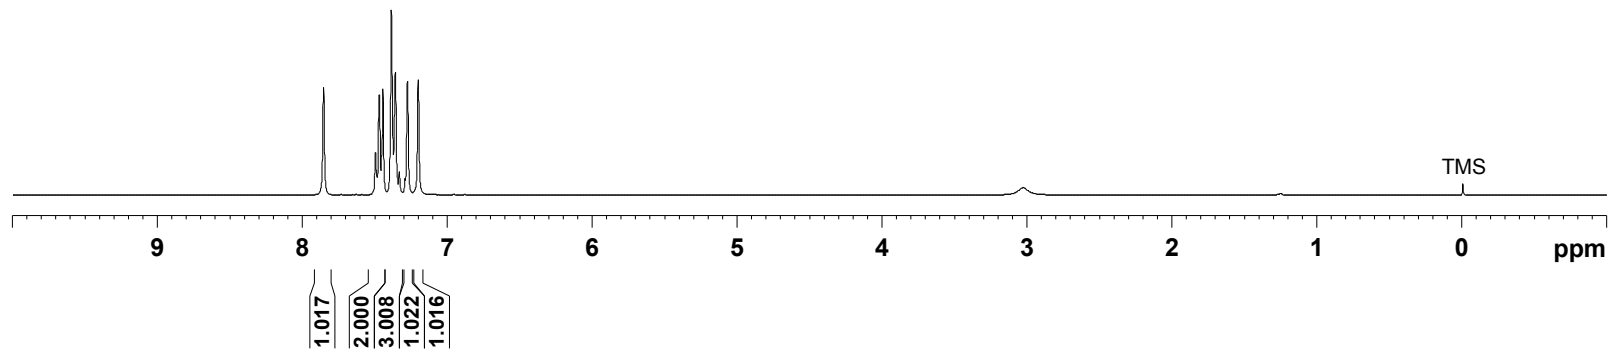

<sup>13</sup>C-NMR (300 MHz, CDCl<sub>3</sub> with 0.03% v/v TMS)

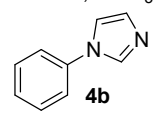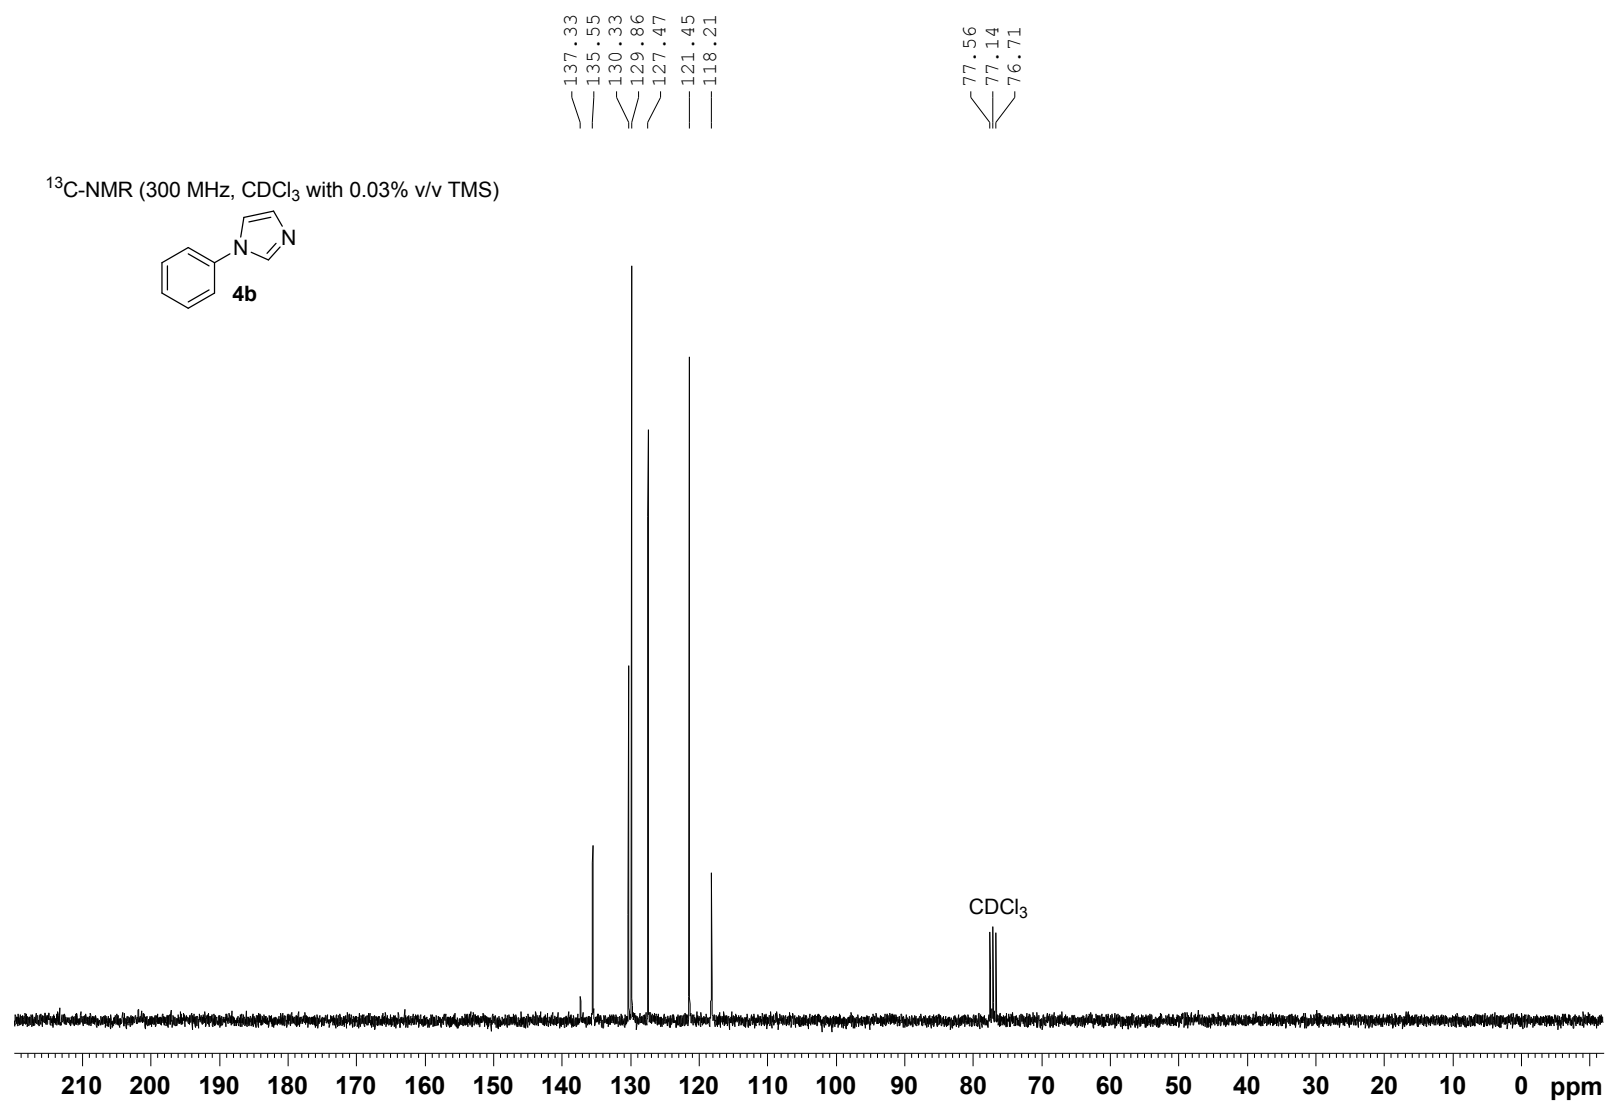

<sup>1</sup>H-NMR (300 MHz, CDCl<sub>3</sub> with 0.03% v/v TMS)

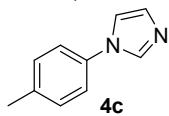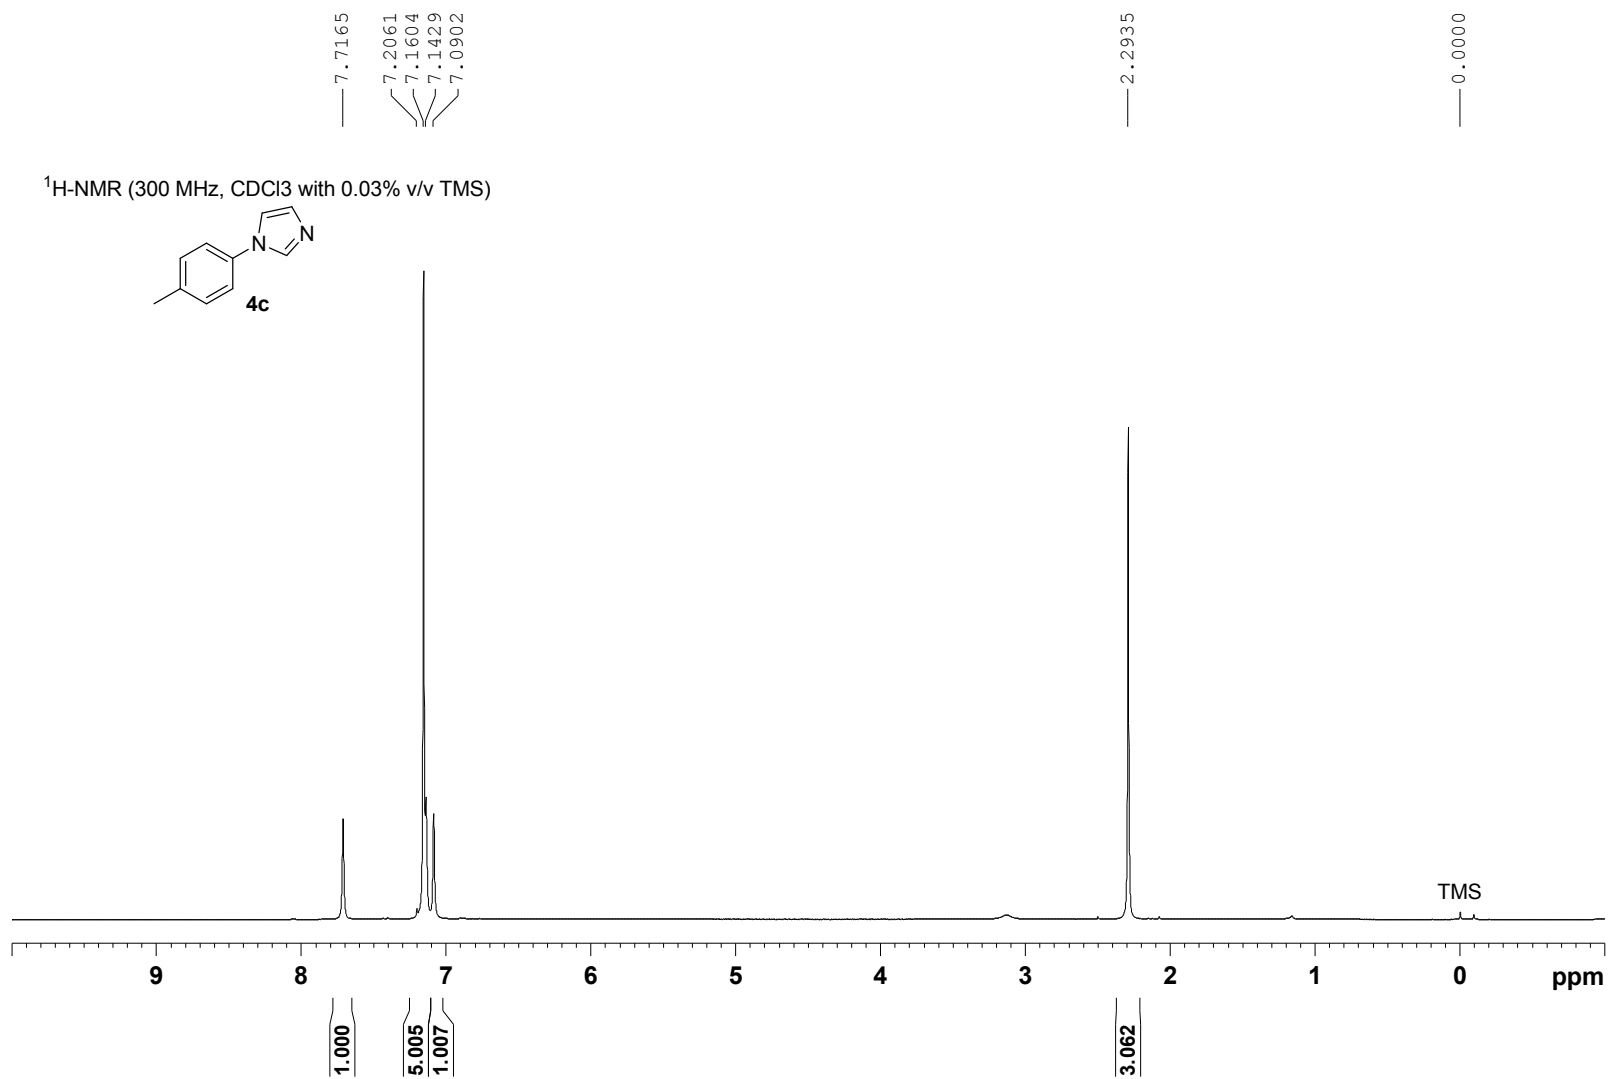

<sup>13</sup>C-NMR (300 MHz, CDCl<sub>3</sub> with 0.03% v/v TMS)

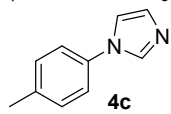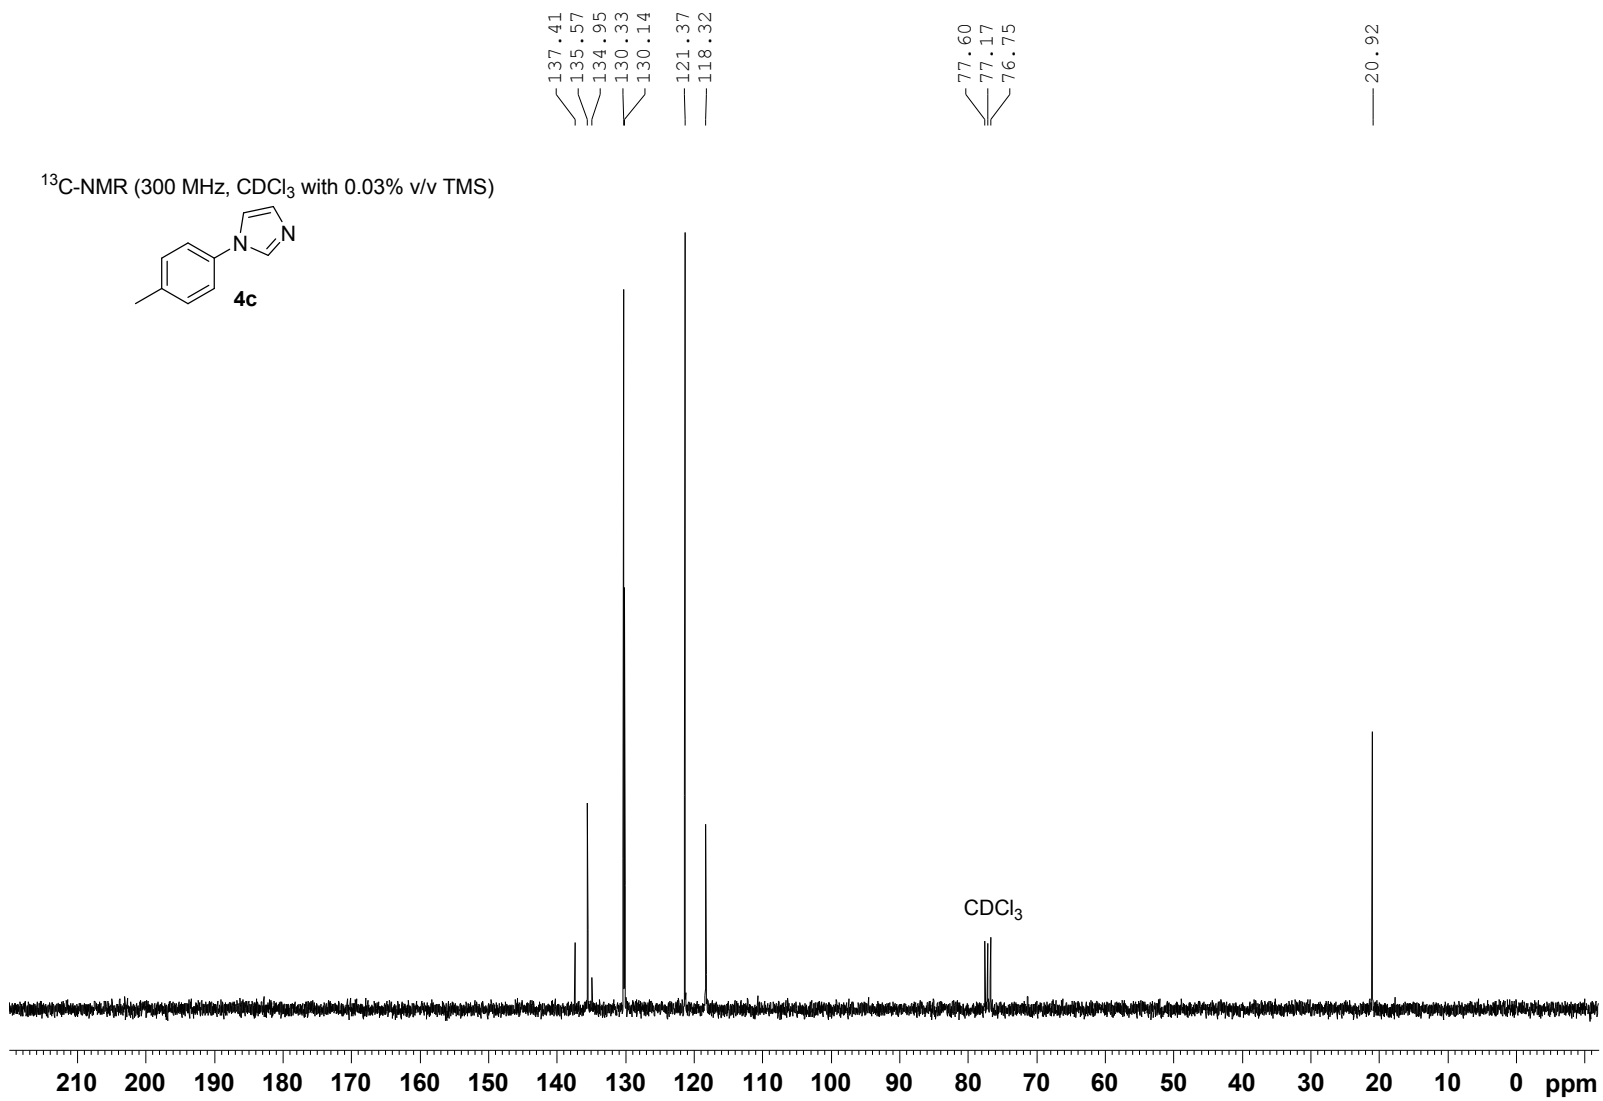

<sup>1</sup>H-NMR (300 MHz, CDCl<sub>3</sub> with 0.03% v/v TMS)

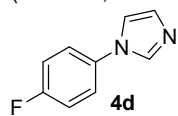

7.7977  
7.3794  
7.3723  
7.3640  
7.3566  
7.3498  
7.3345  
7.2330  
7.1866  
7.1585  
7.1296  
6.8684  
6.8468

— 0.0149

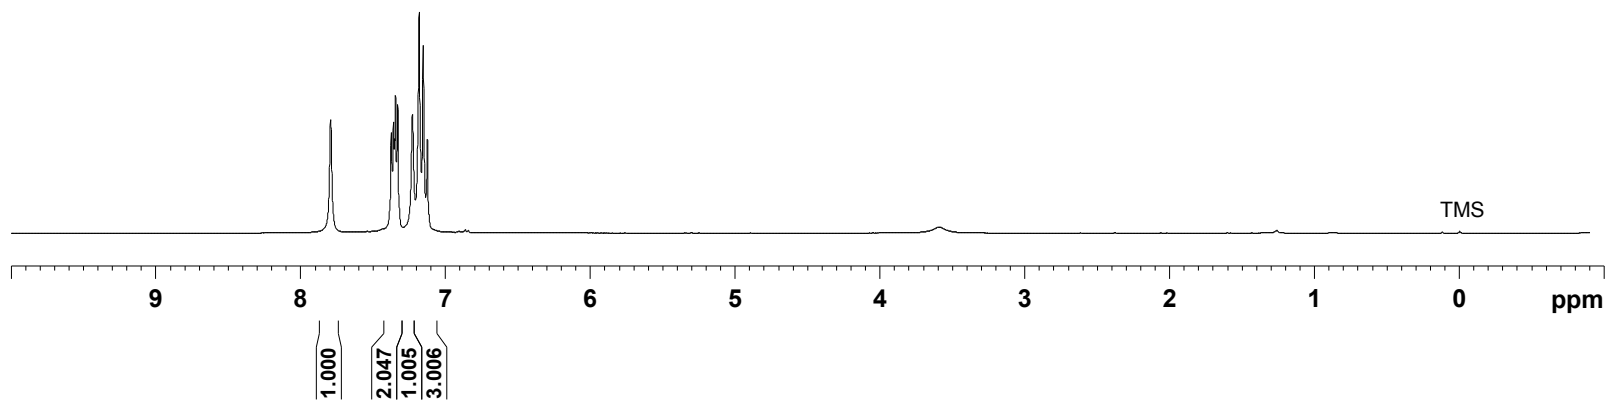

<sup>13</sup>C-NMR (300 MHz, CDCl<sub>3</sub> with 0.03% v/v TMS)

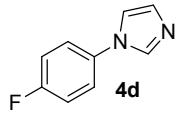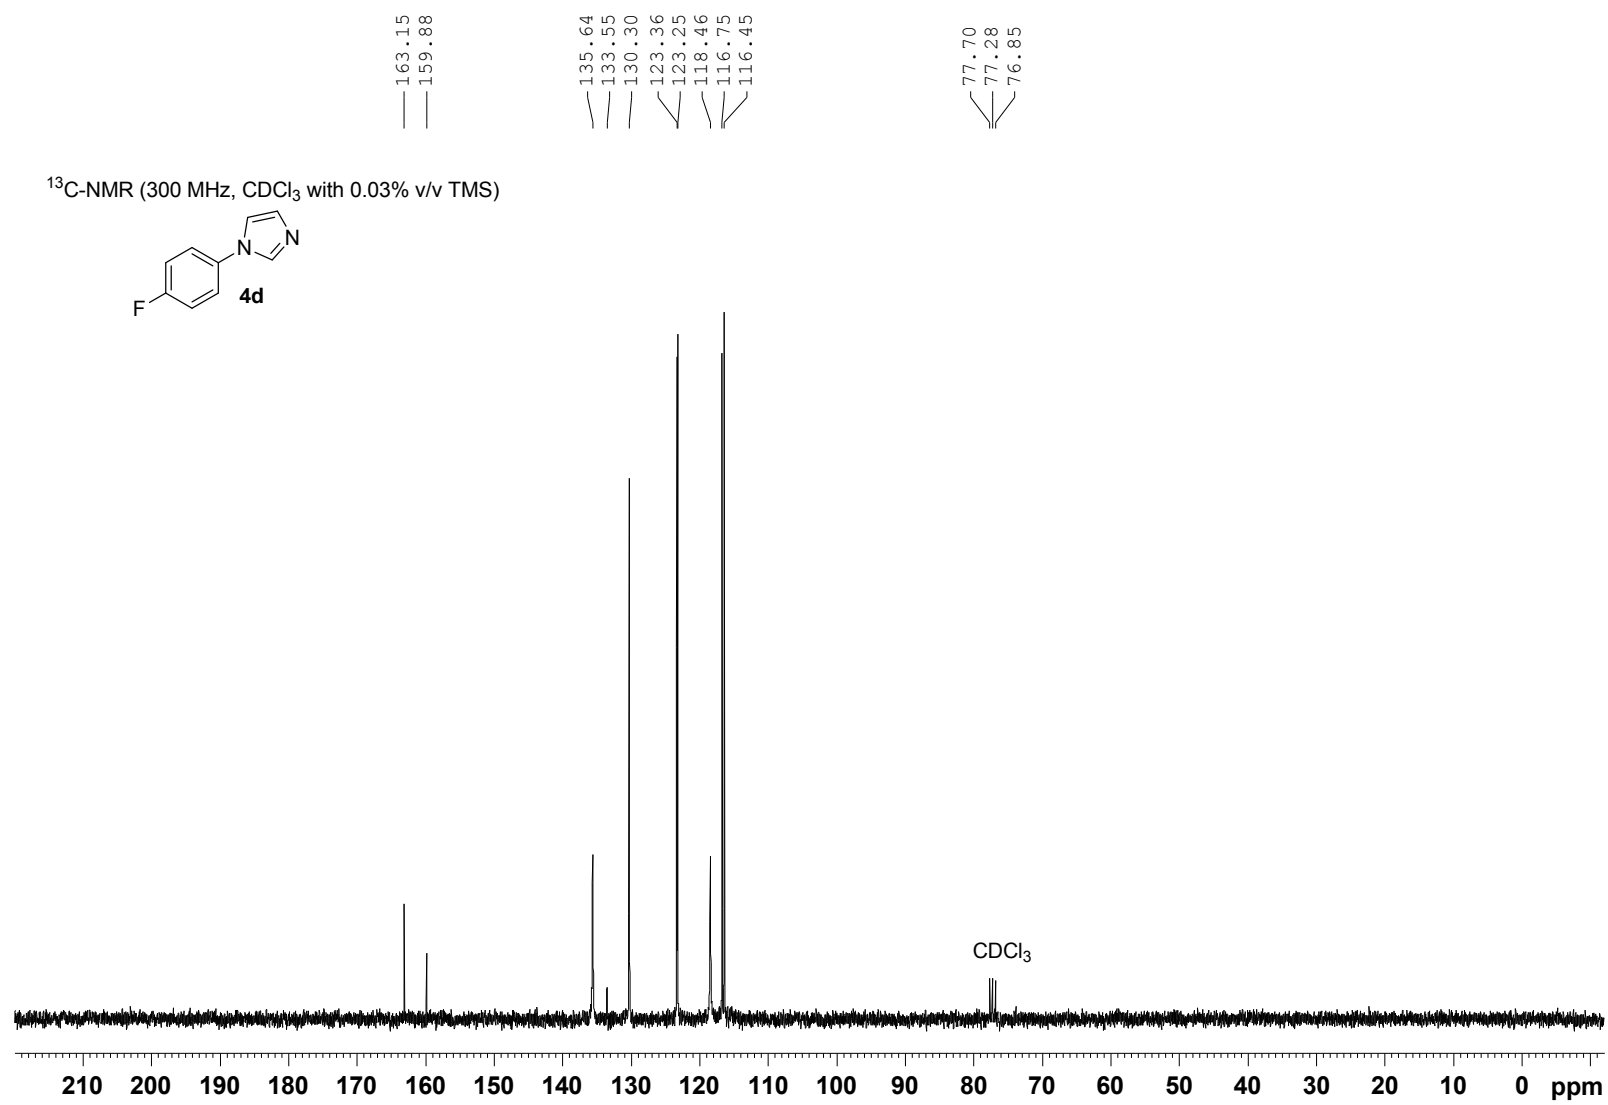

<sup>1</sup>H-NMR (300 MHz, CDCl<sub>3</sub> with 0.03% v/v TMS)

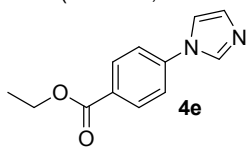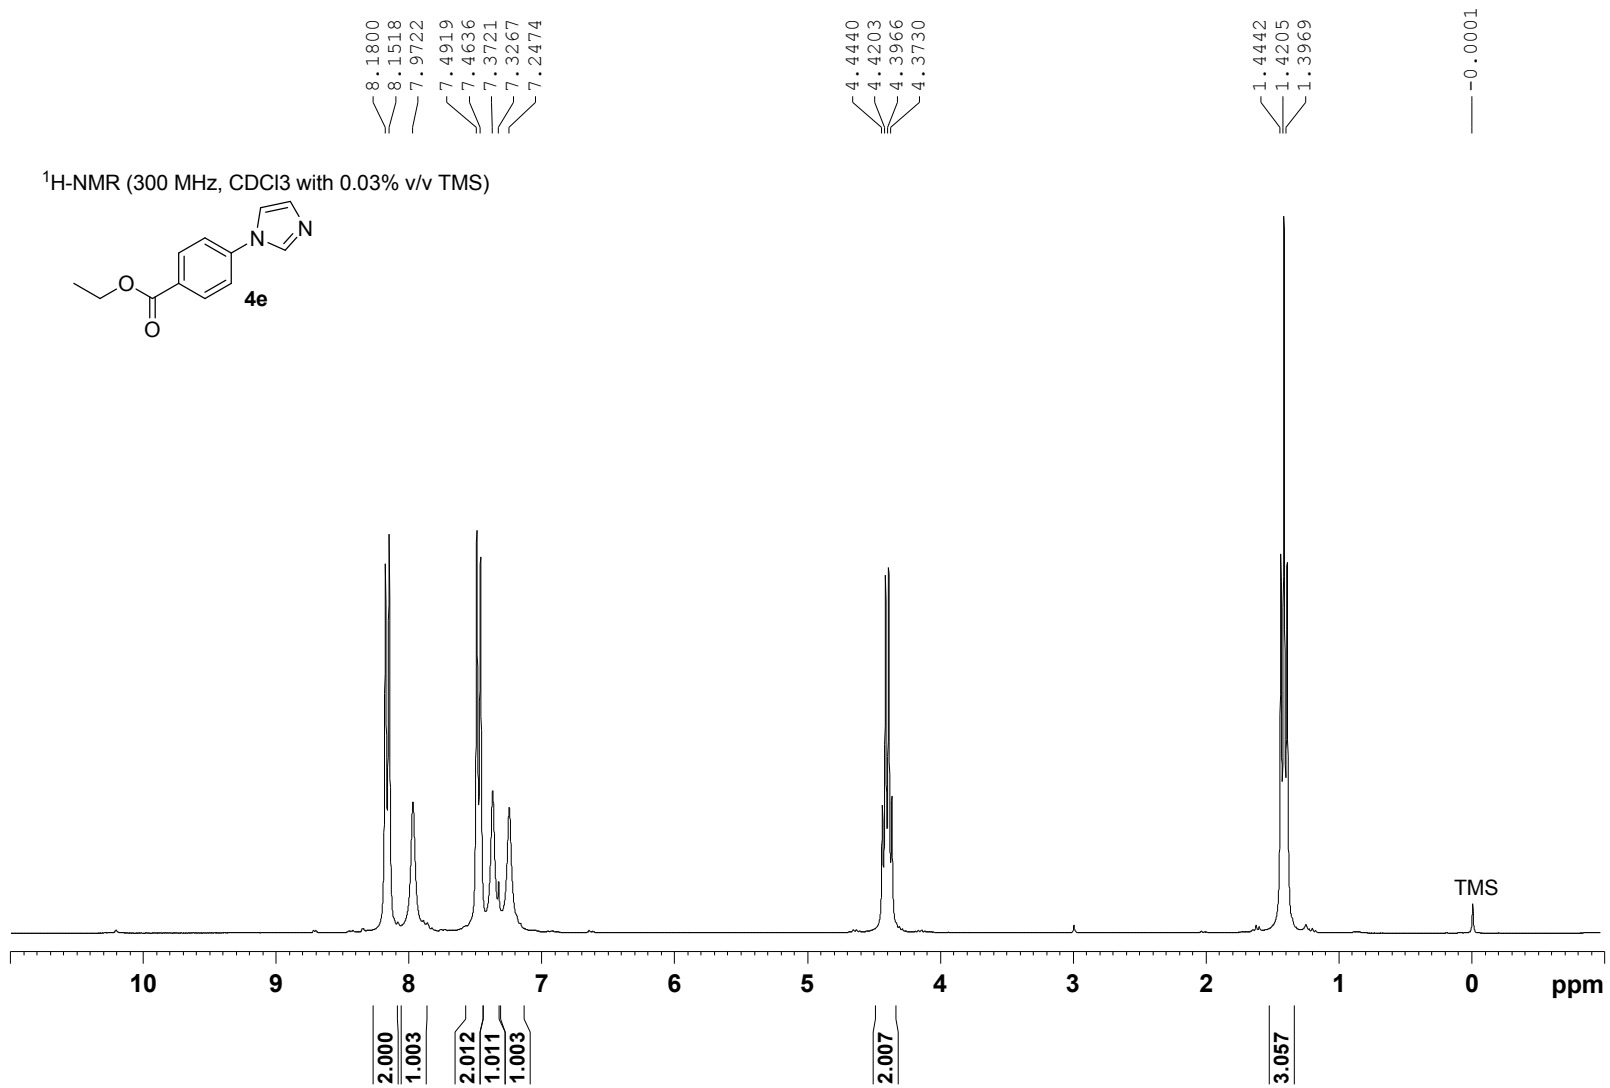

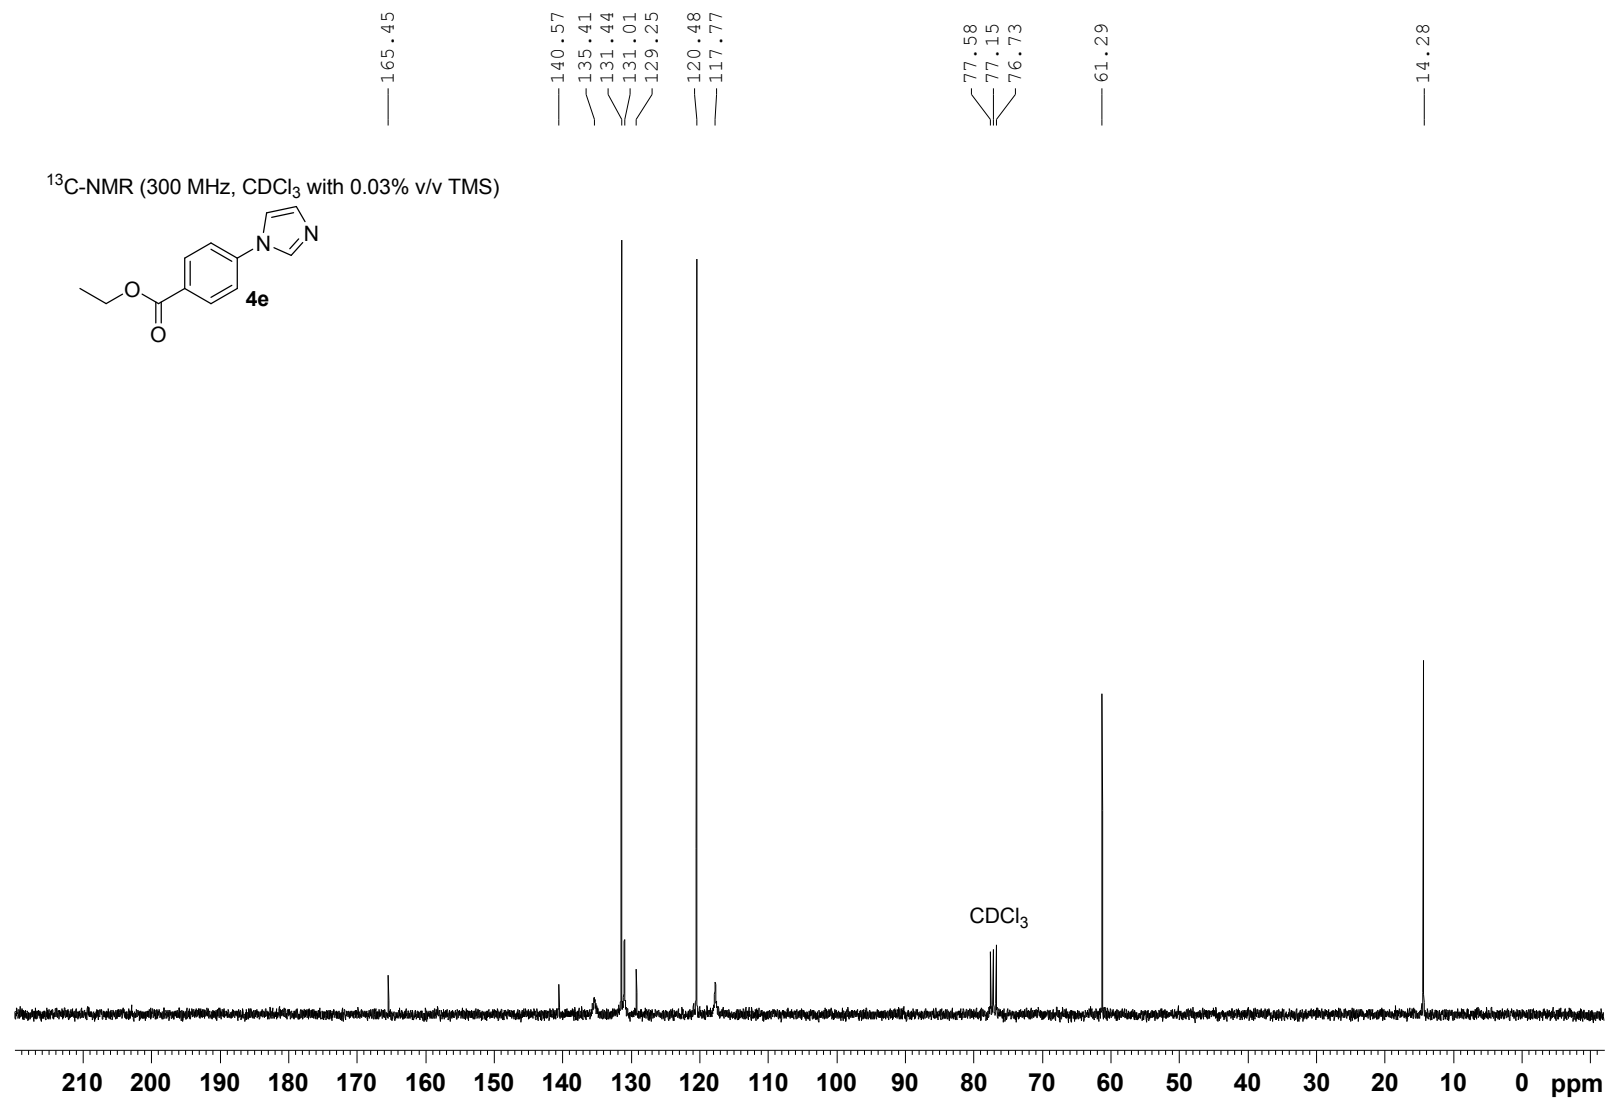



<sup>1</sup>H-NMR (300 MHz, CDCl<sub>3</sub> with 0.03% v/v TMS)

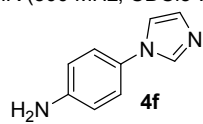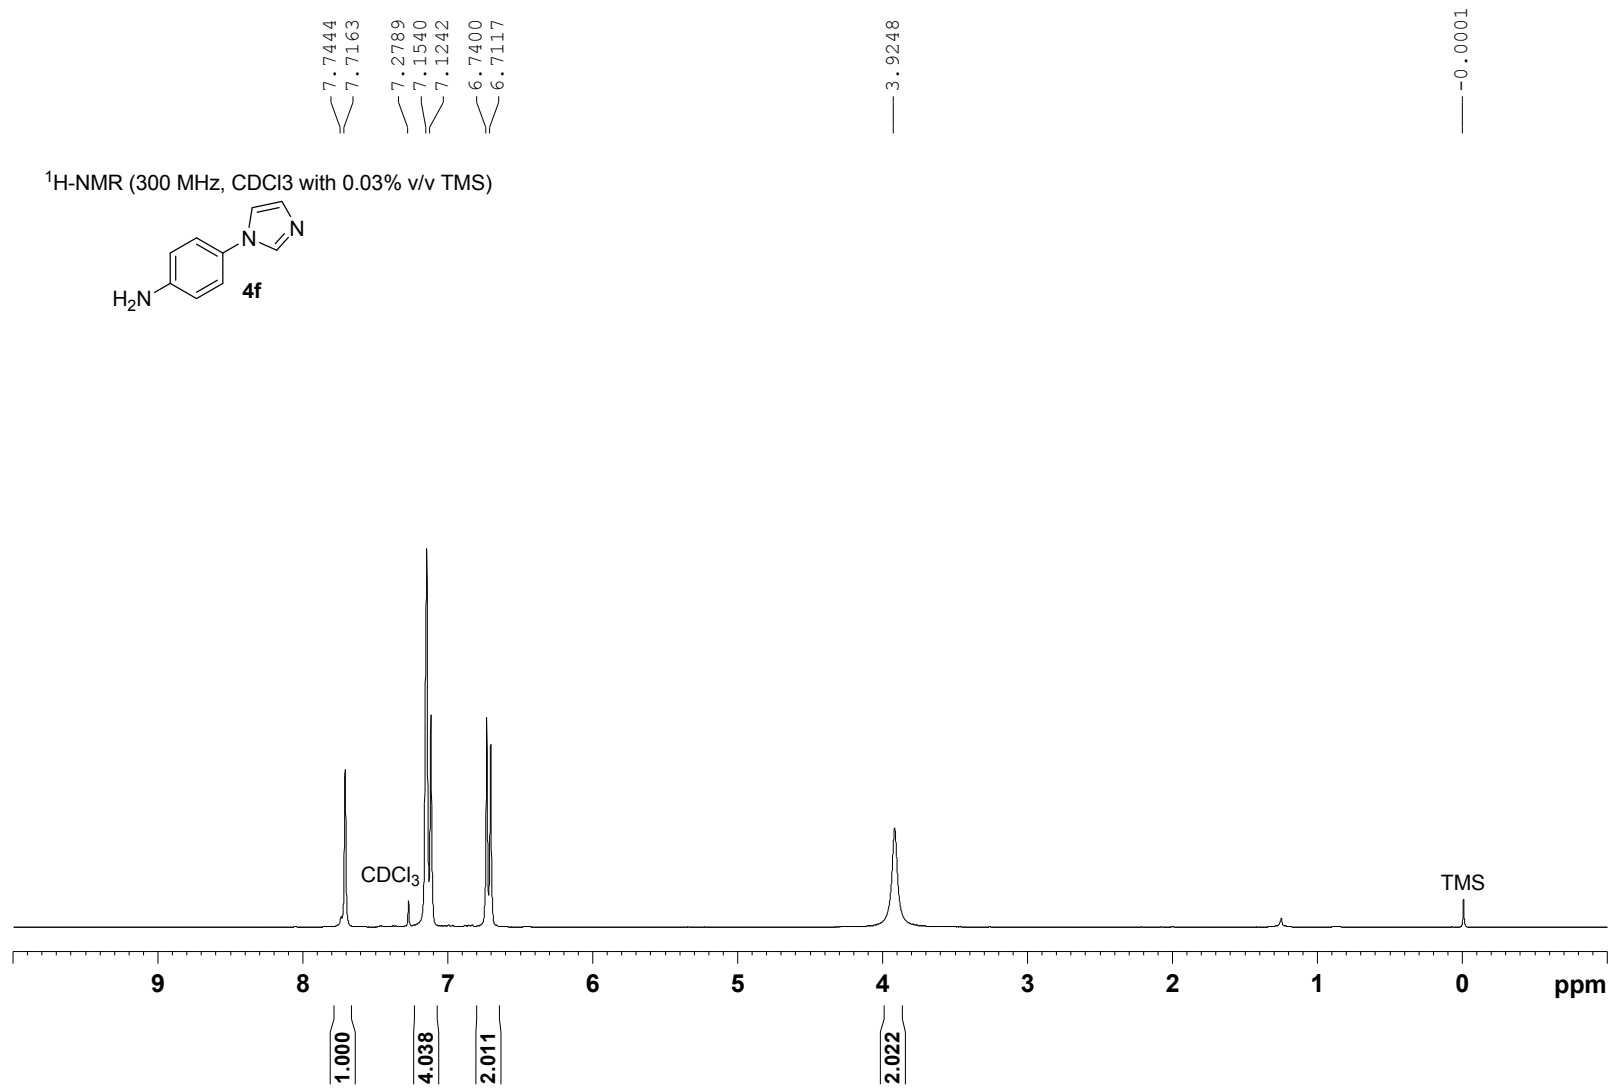

<sup>13</sup>C-NMR (300 MHz, CDCl<sub>3</sub> with 0.03% v/v TMS)

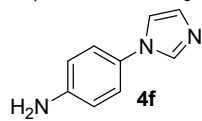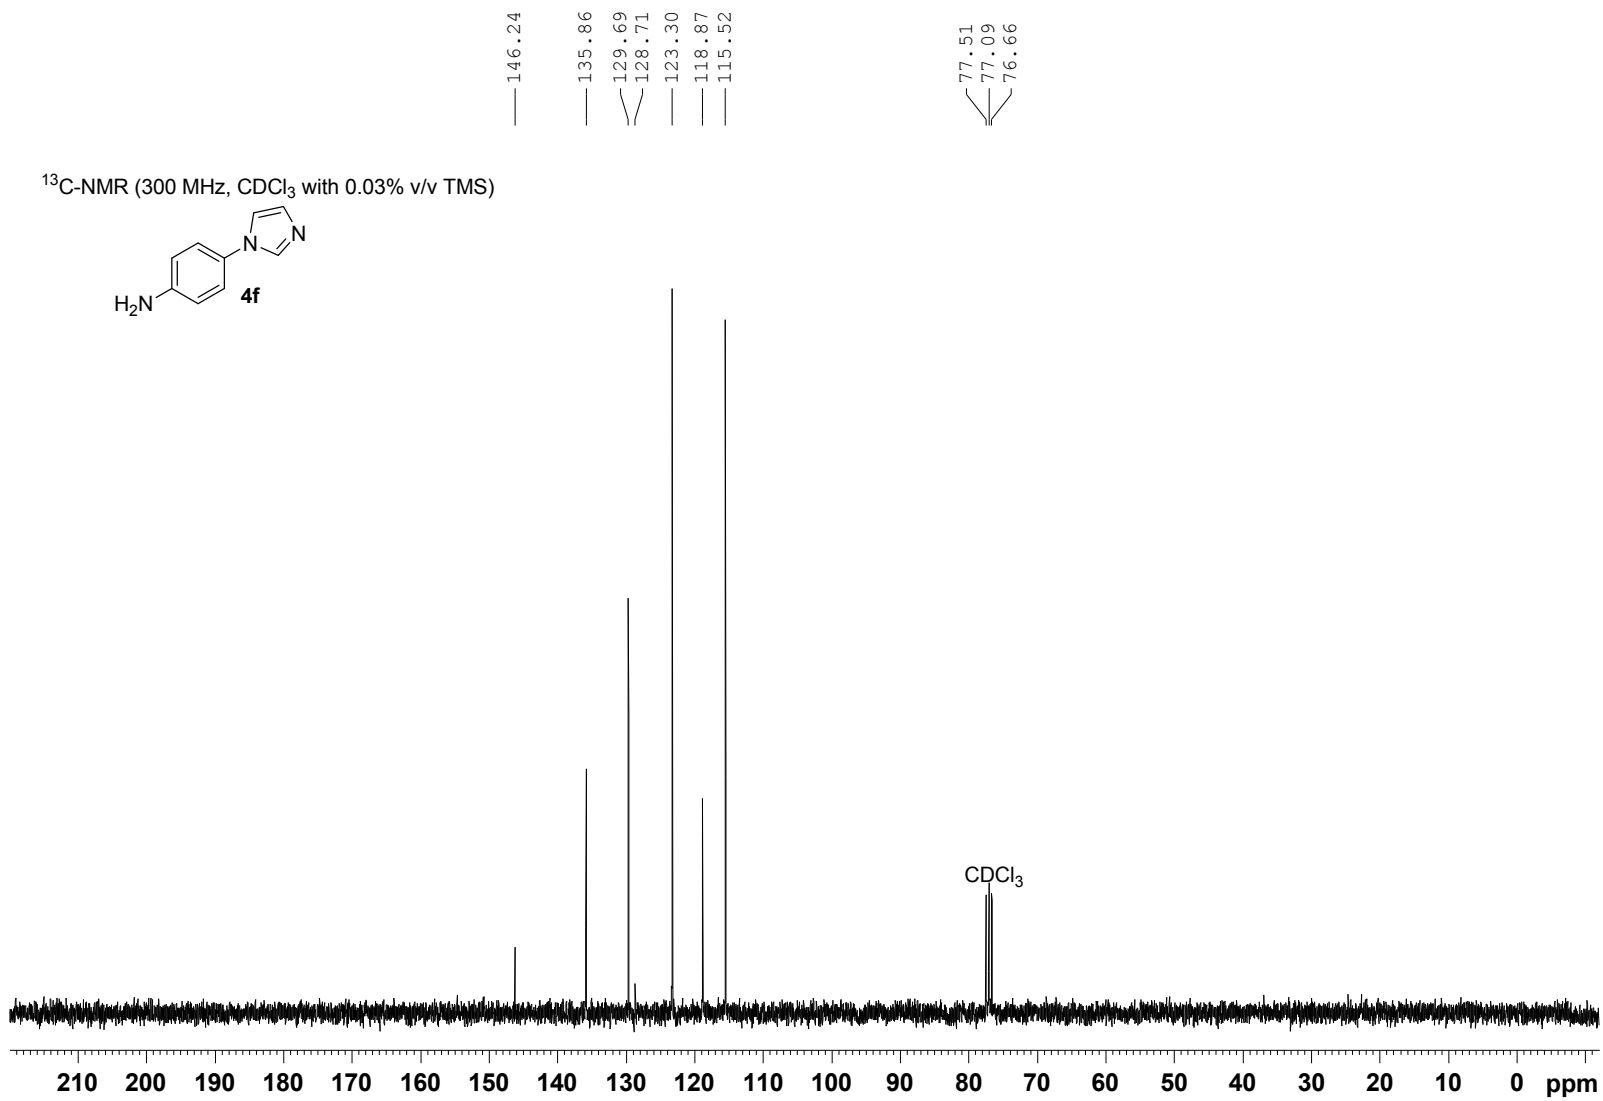

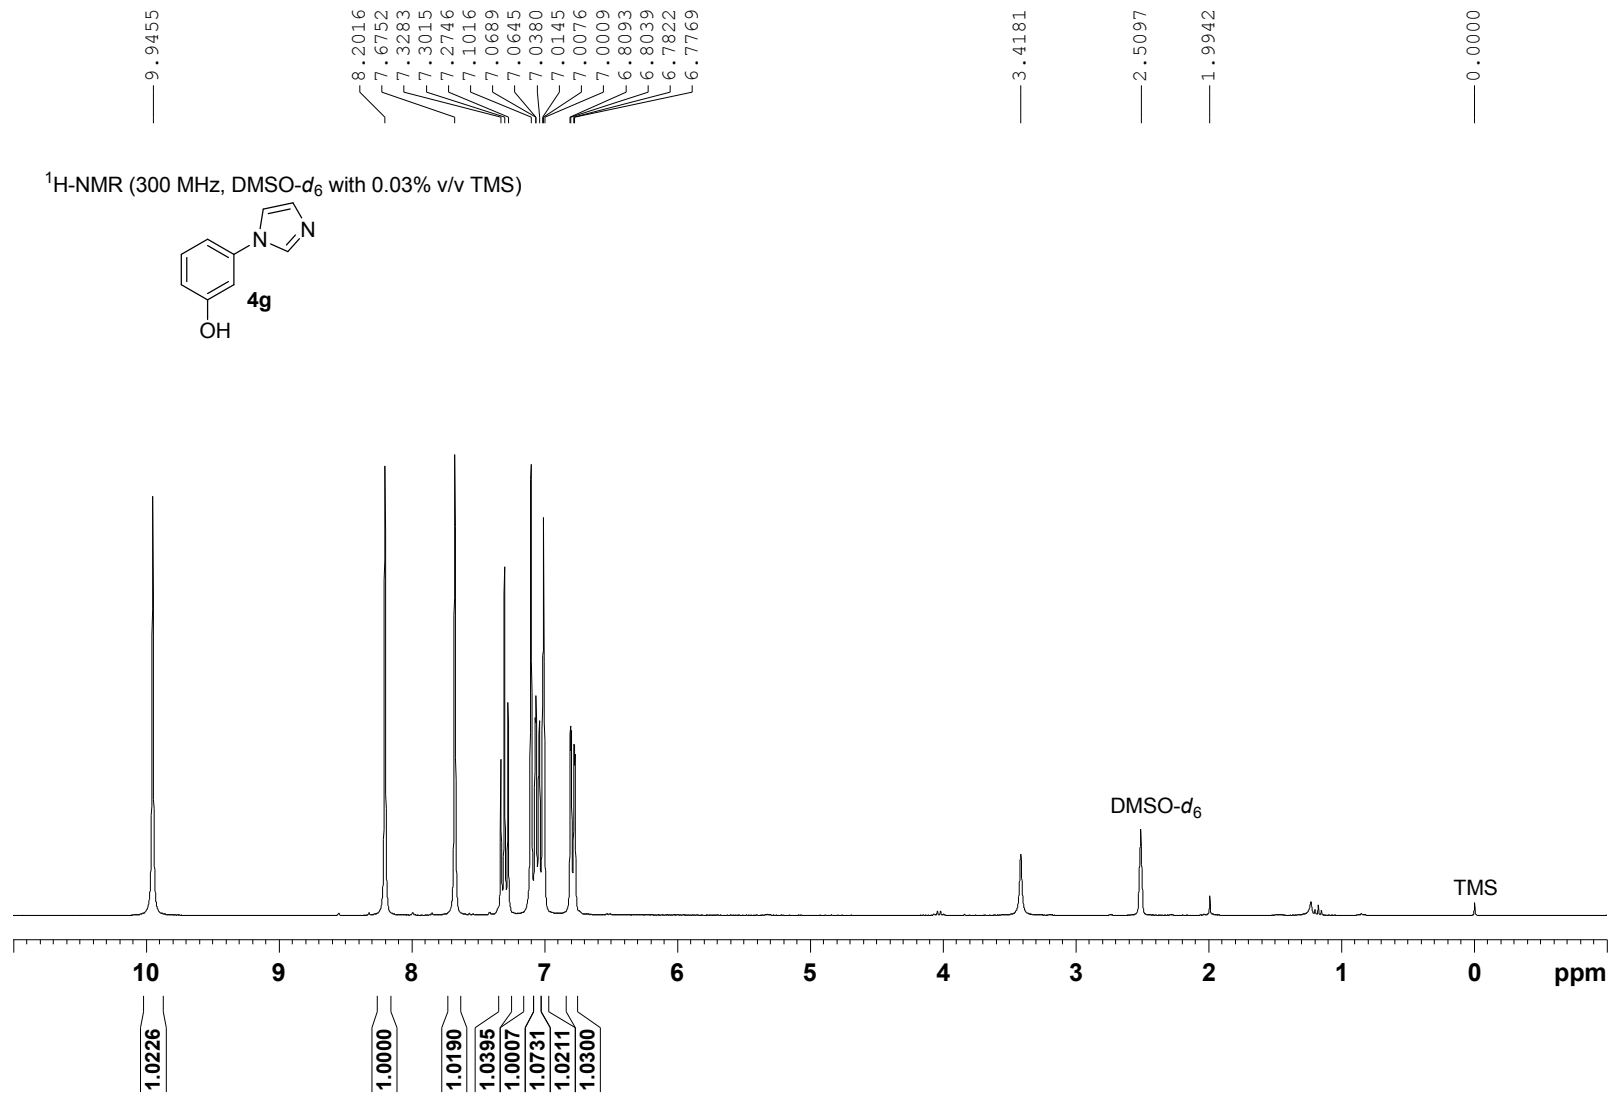

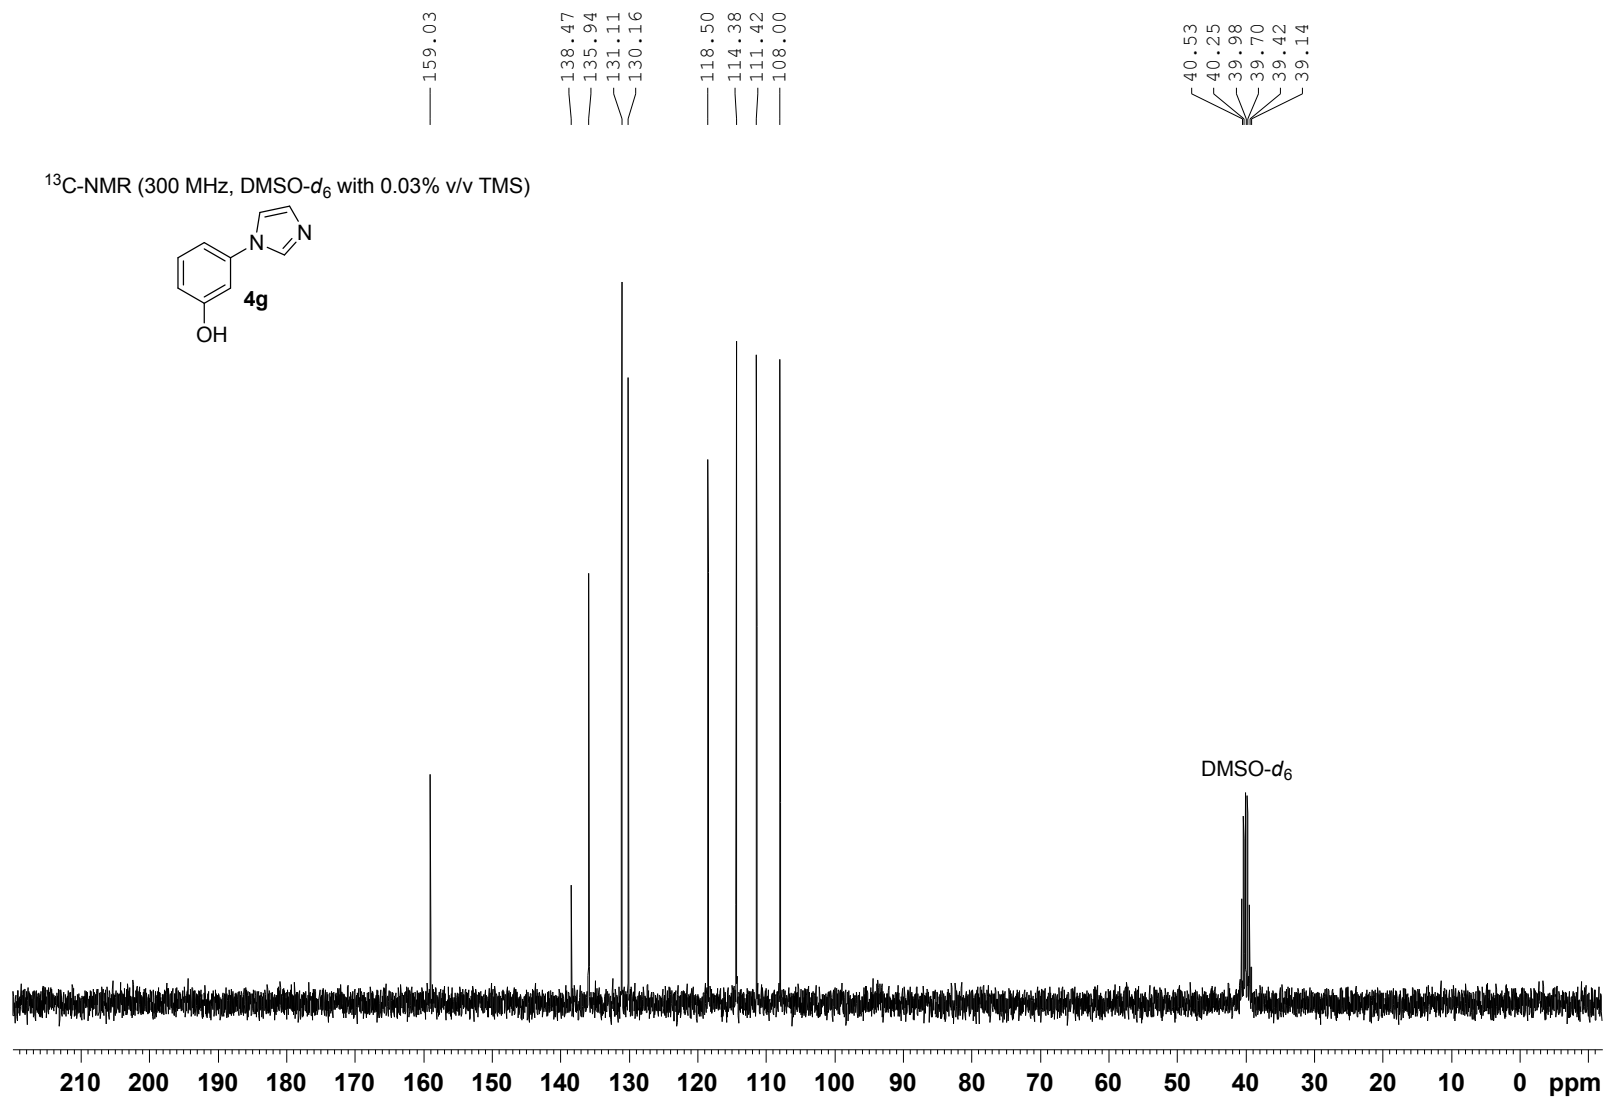

<sup>1</sup>H-NMR (300 MHz, CDCl<sub>3</sub> with 0.03% v/v TMS)

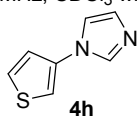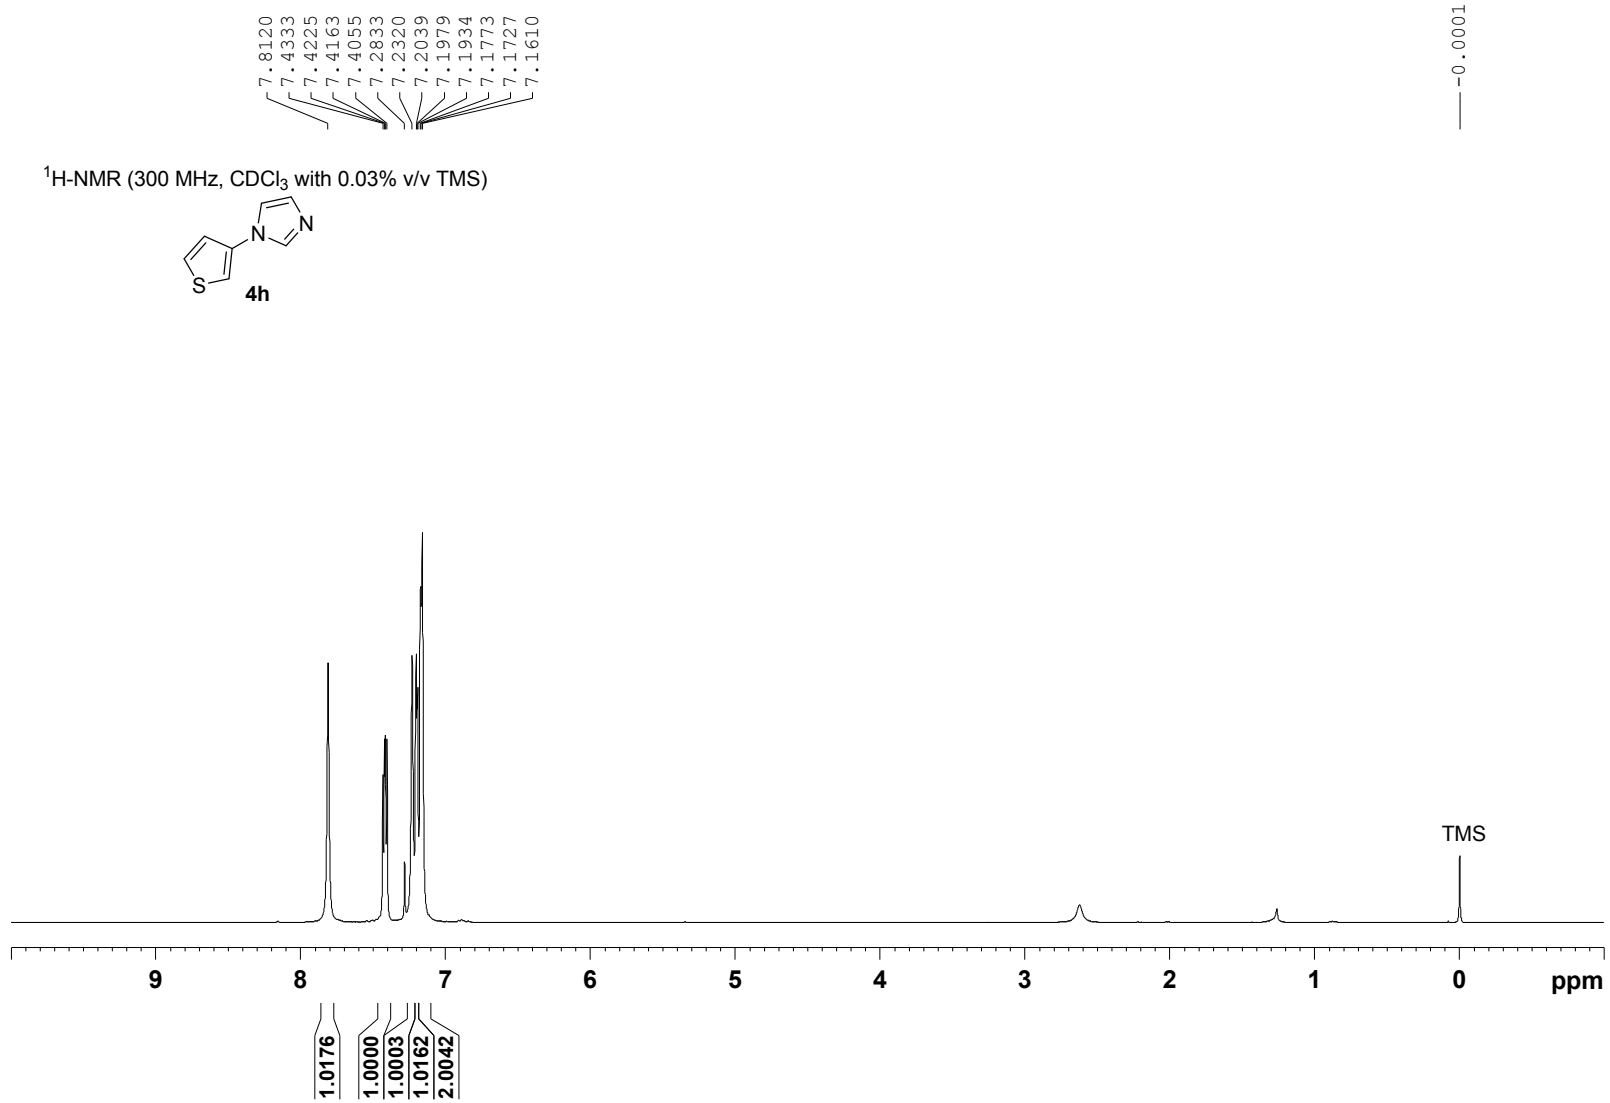

<sup>13</sup>C-NMR (300 MHz, CDCl<sub>3</sub> with 0.03% v/v TMS)

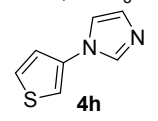

136.25  
135.83  
130.01  
127.15  
121.42  
118.51  
113.19

77.50  
77.08  
76.66

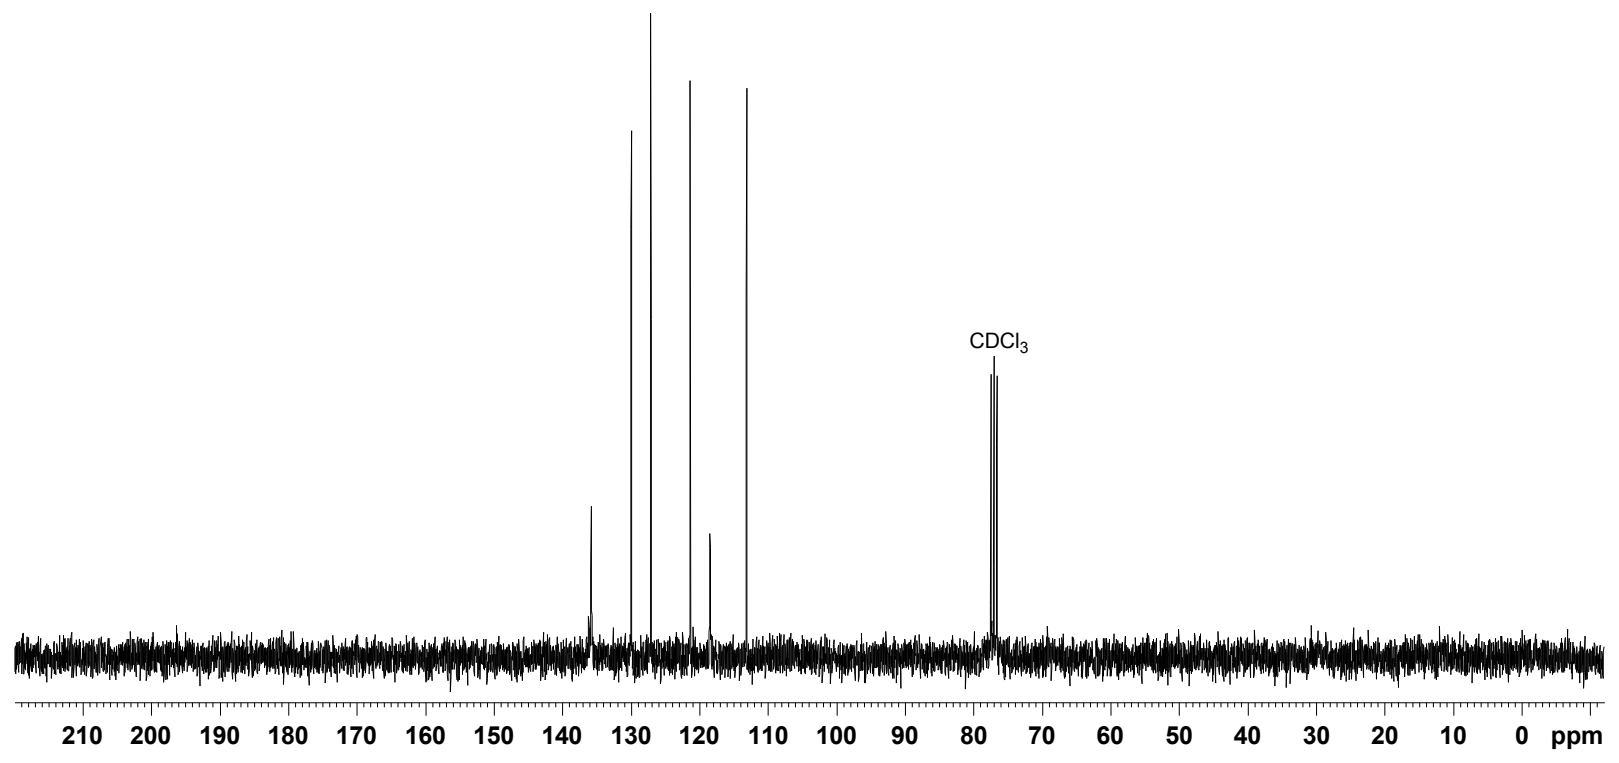

<sup>1</sup>H-NMR (300 MHz, CDCl<sub>3</sub> with 0.03% v/v TMS)

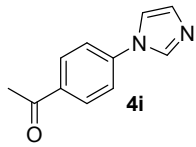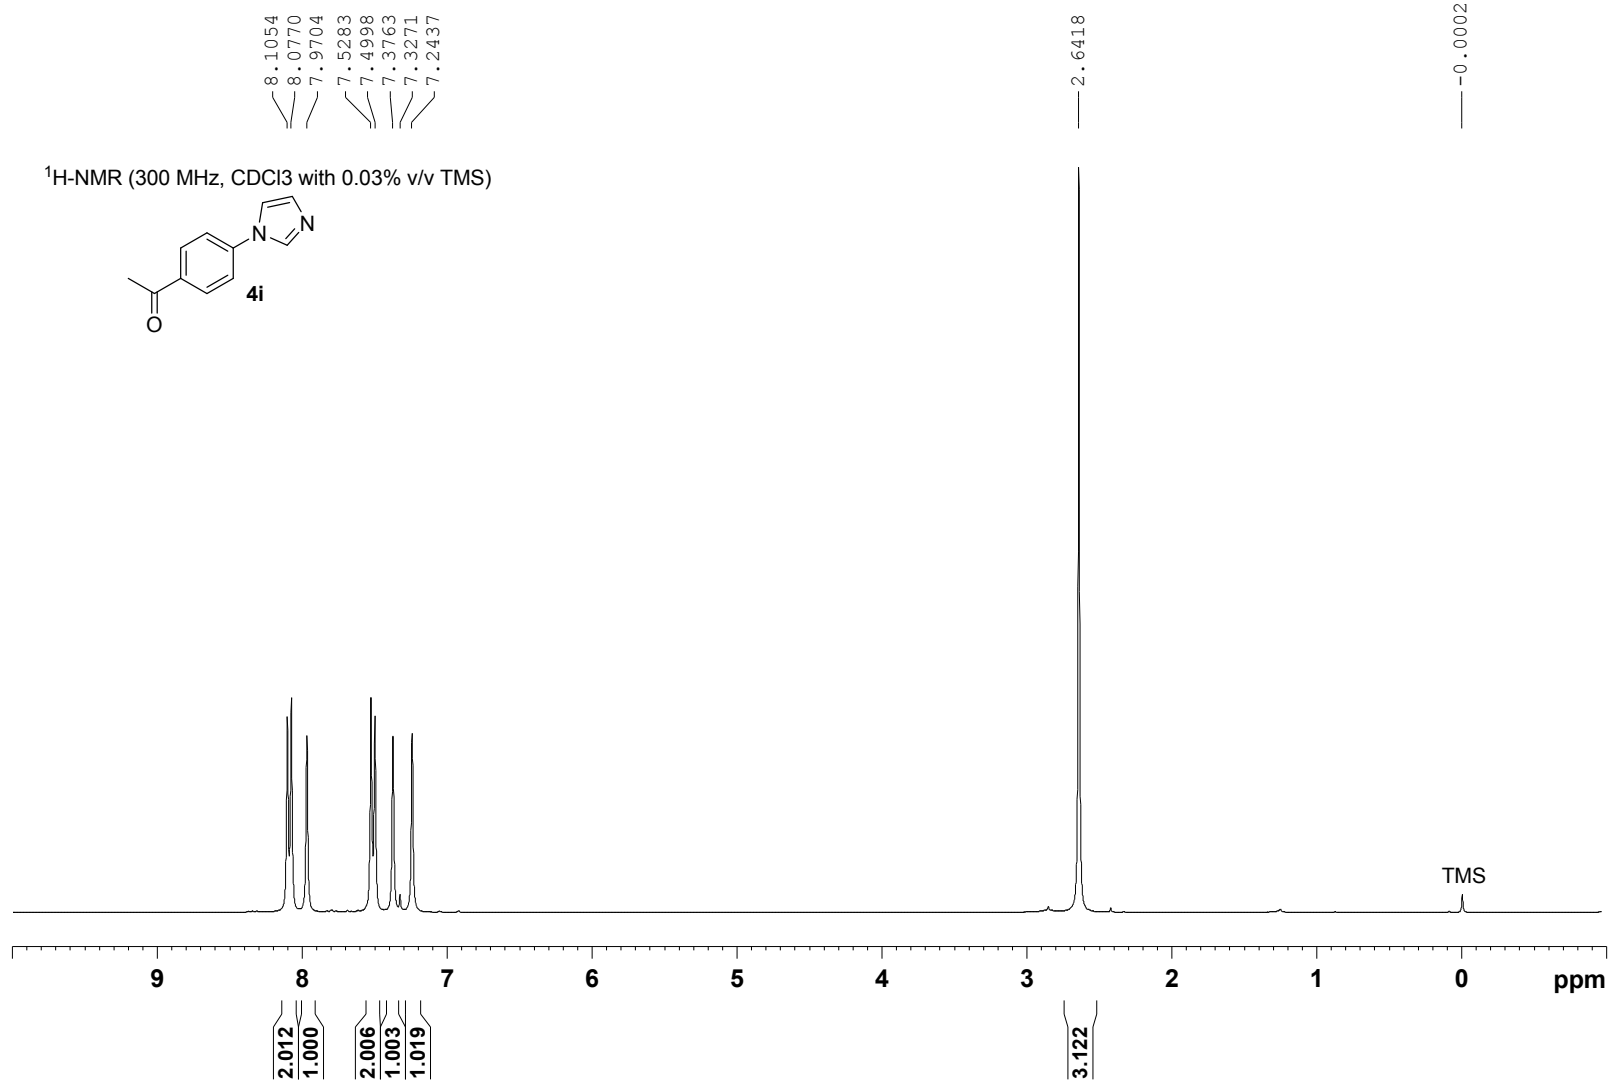

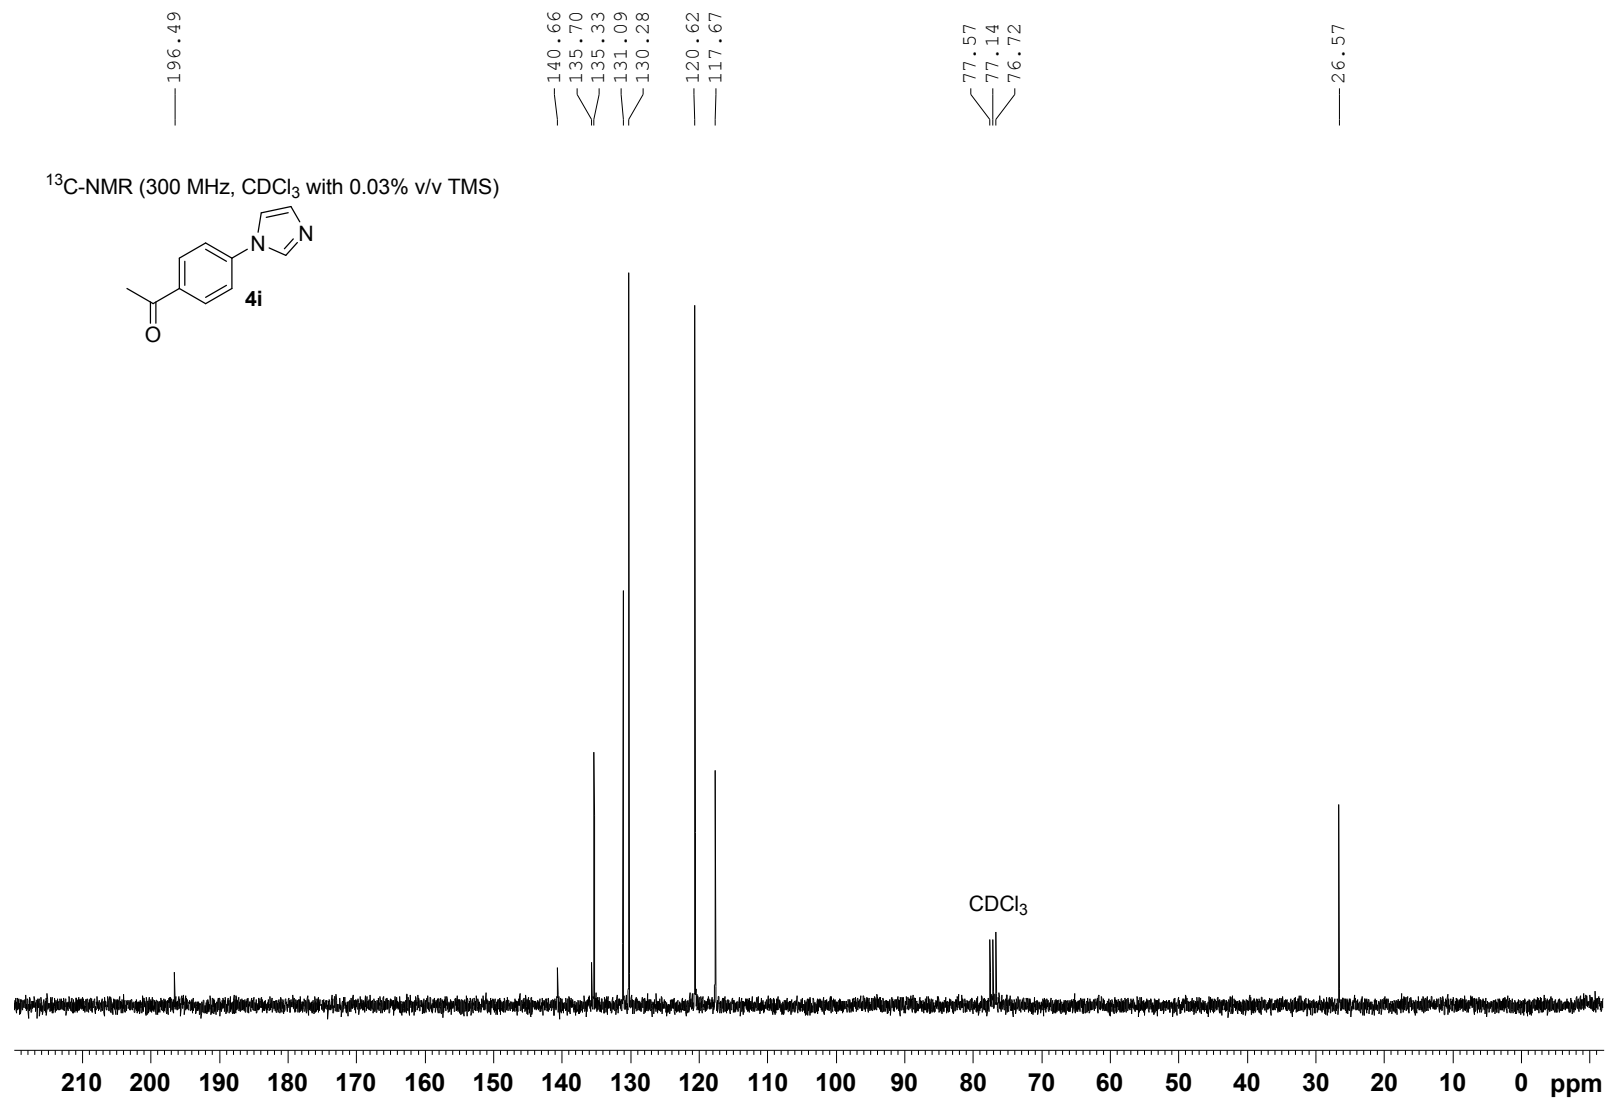



<sup>1</sup>H-NMR (300 MHz, CDCl<sub>3</sub> with 0.03% v/v TMS)

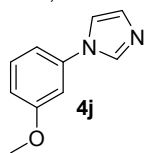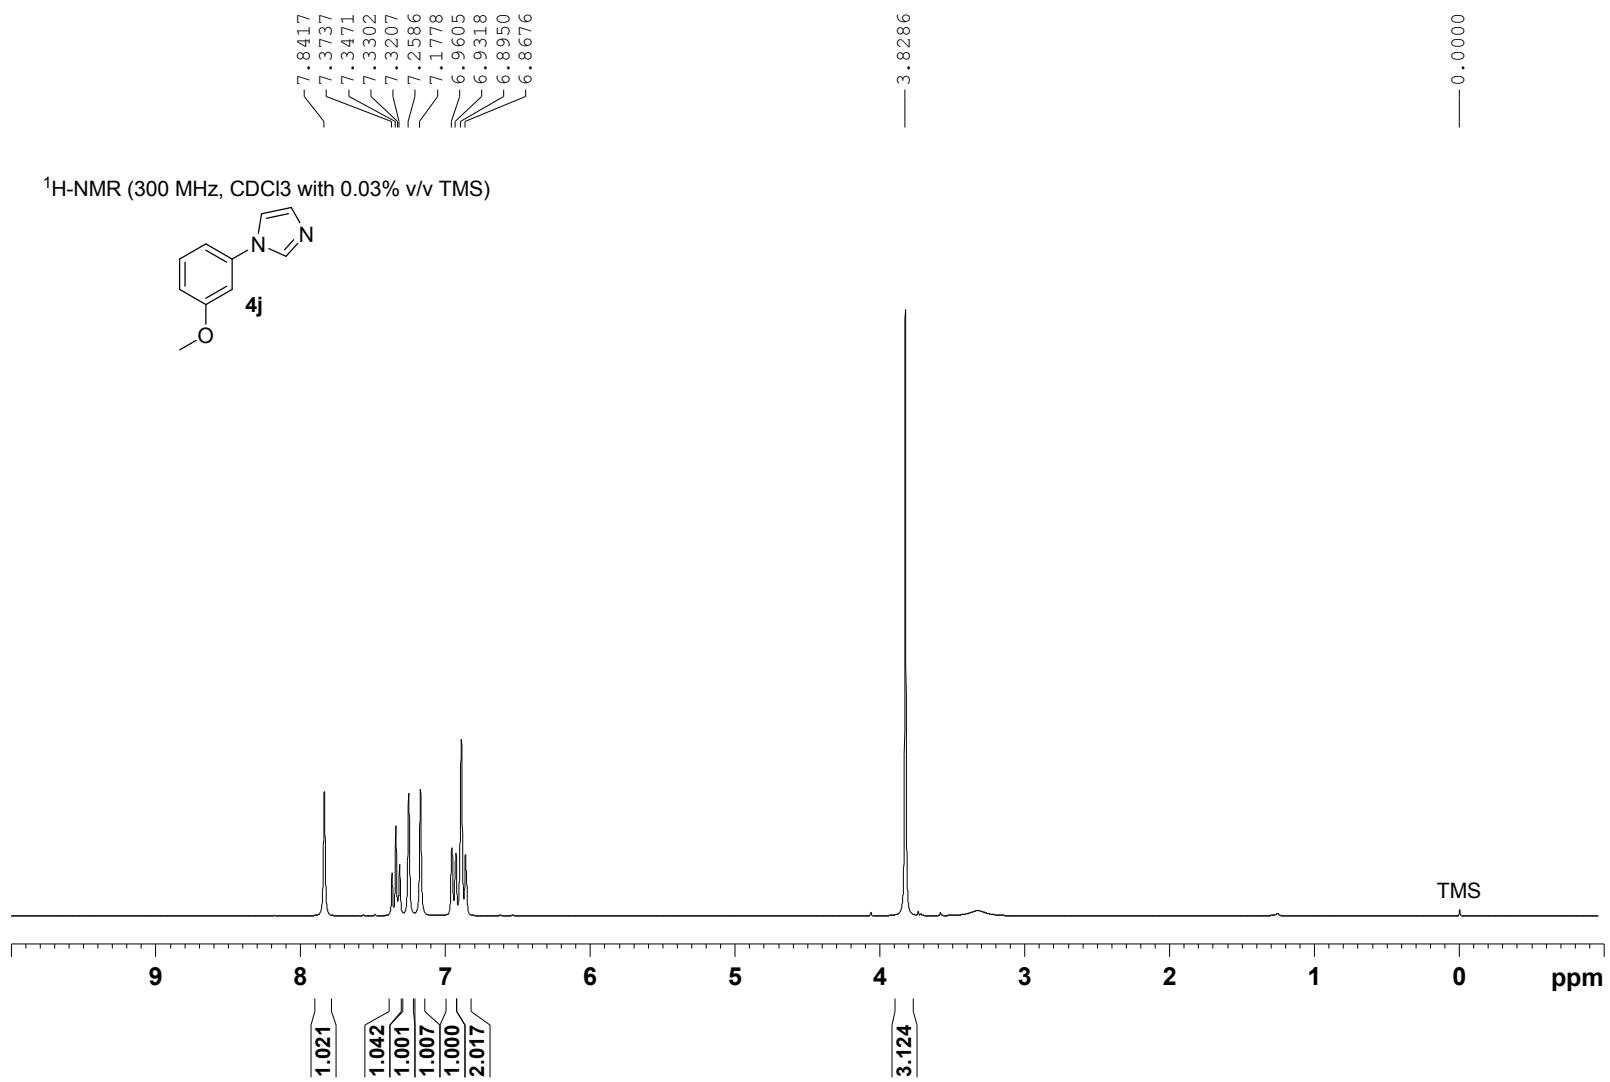

<sup>13</sup>C-NMR (300 MHz, CDCl<sub>3</sub> with 0.03% v/v TMS)

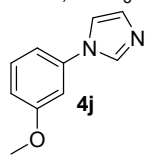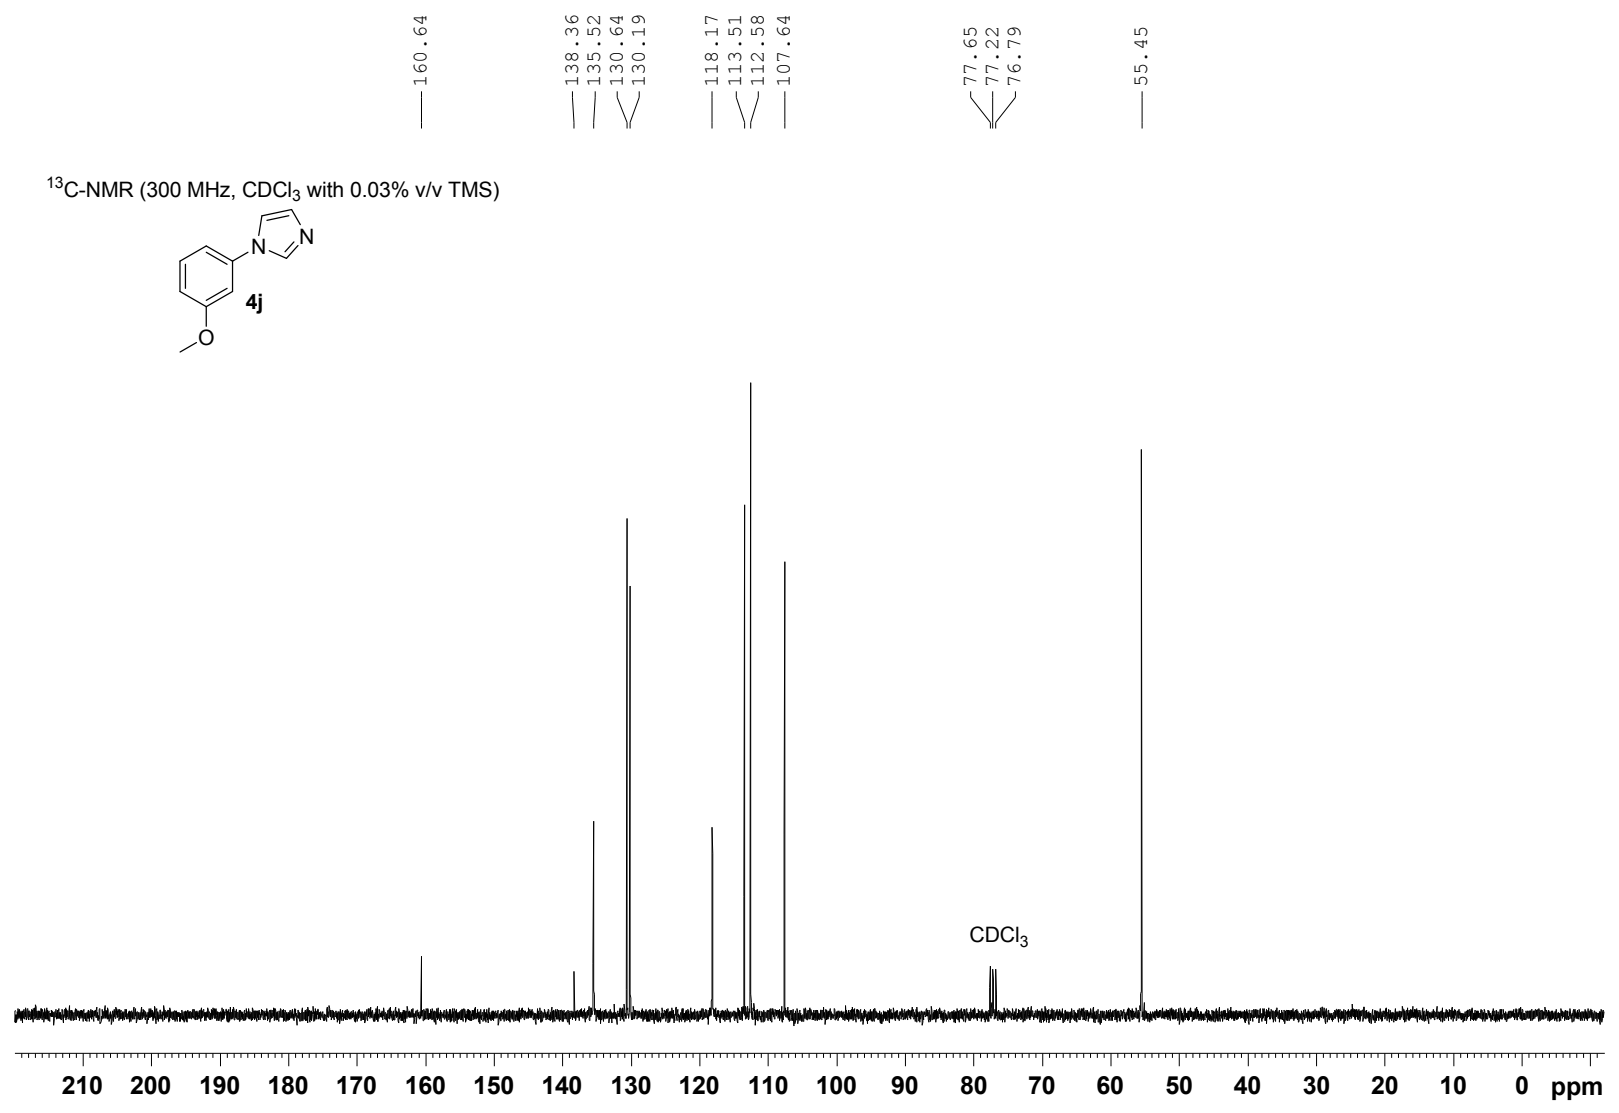

8.4502  
8.4371  
8.3676  
7.8230  
7.8174  
7.7961  
7.7924  
7.7709  
7.7652  
7.6469  
7.4189  
7.3602  
7.3328  
7.2318  
7.2148  
7.2080  
7.1888

— 0.0001

<sup>1</sup>H-NMR (300 MHz, CDCl<sub>3</sub> with 0.03% v/v TMS)

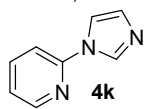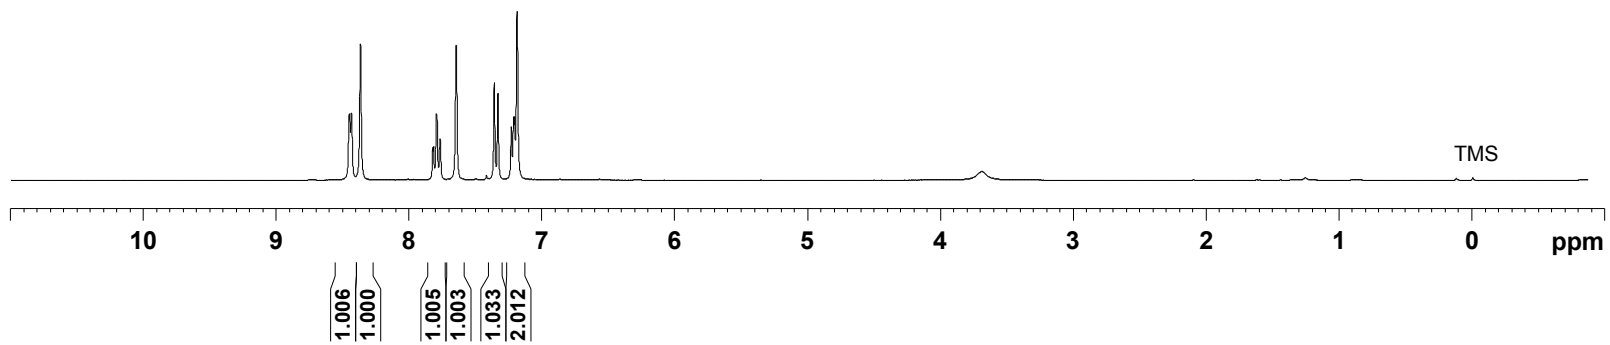

<sup>13</sup>C-NMR (300 MHz, CDCl<sub>3</sub> with 0.03% v/v TMS)

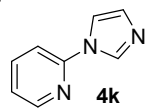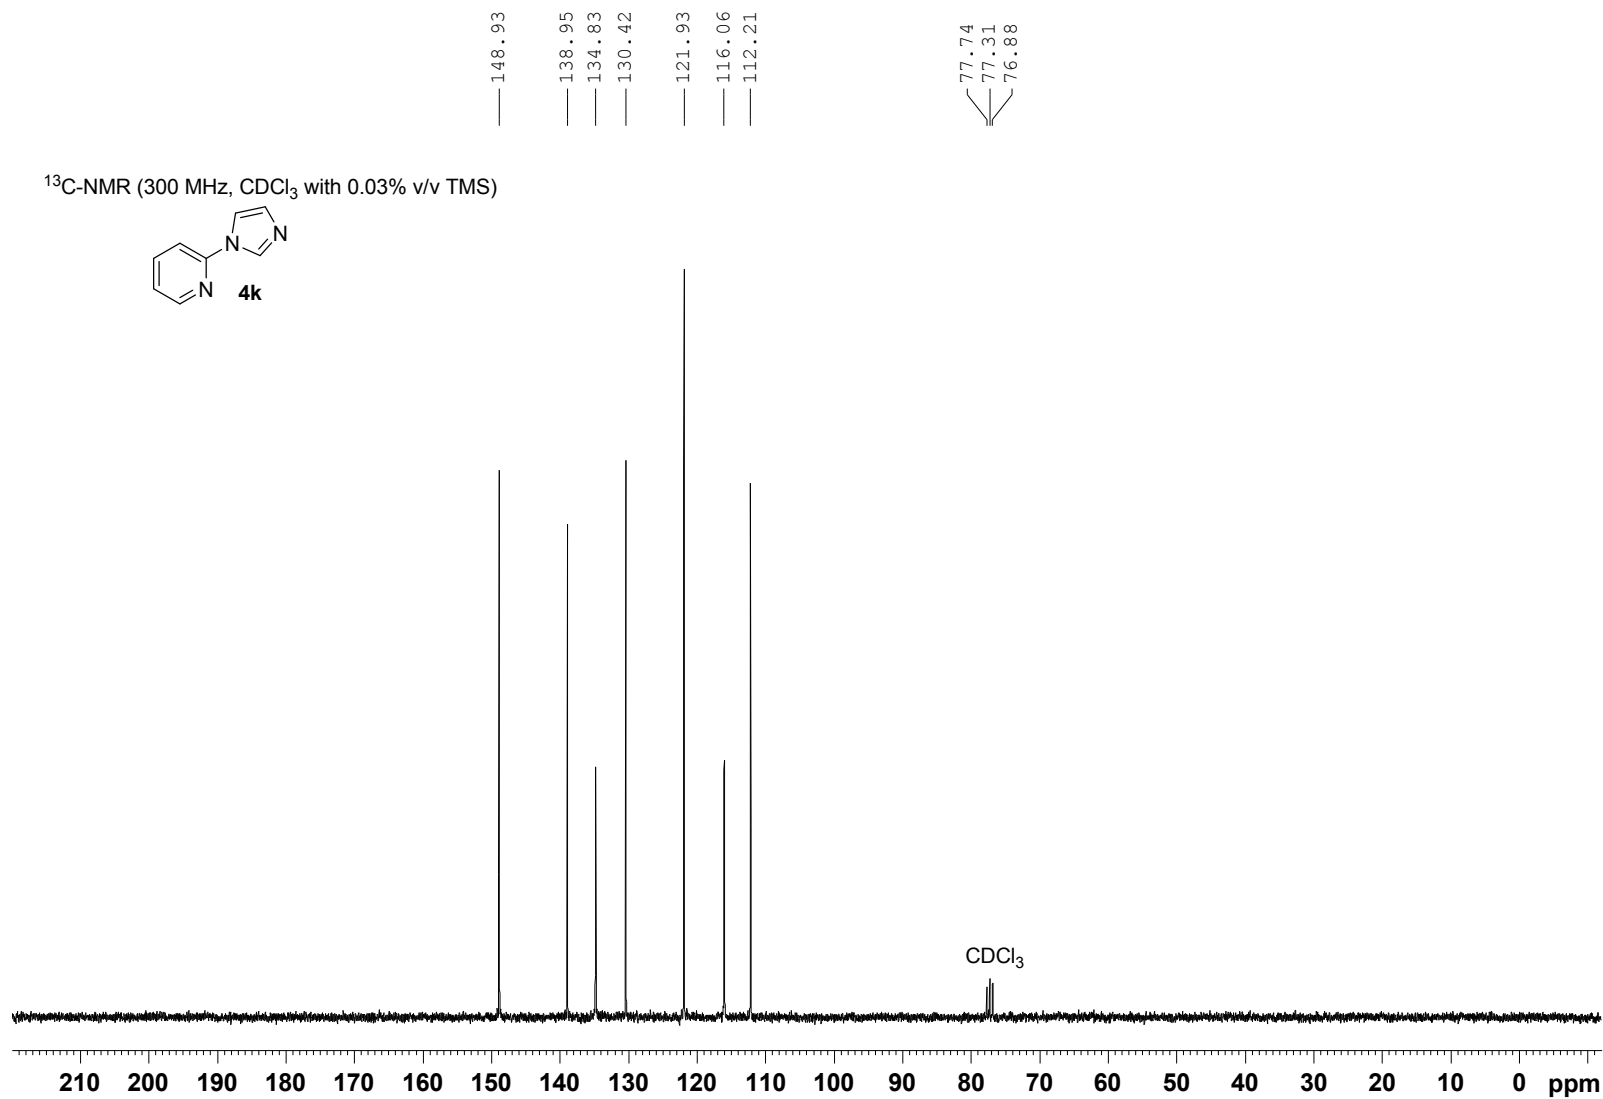

8.7710  
8.7630  
8.6646  
8.6603  
8.6487  
8.6445  
7.8991  
7.7672  
7.7623  
7.7585  
7.7536  
7.7398  
7.7350  
7.7312  
7.7263  
7.4910  
7.4896  
7.4752  
7.4736  
7.4638  
7.4479  
7.3217  
7.2800

— 0.0001

<sup>1</sup>H-NMR (300 MHz, CDCl<sub>3</sub> with 0.03% v/v TMS)

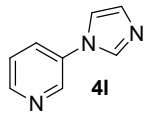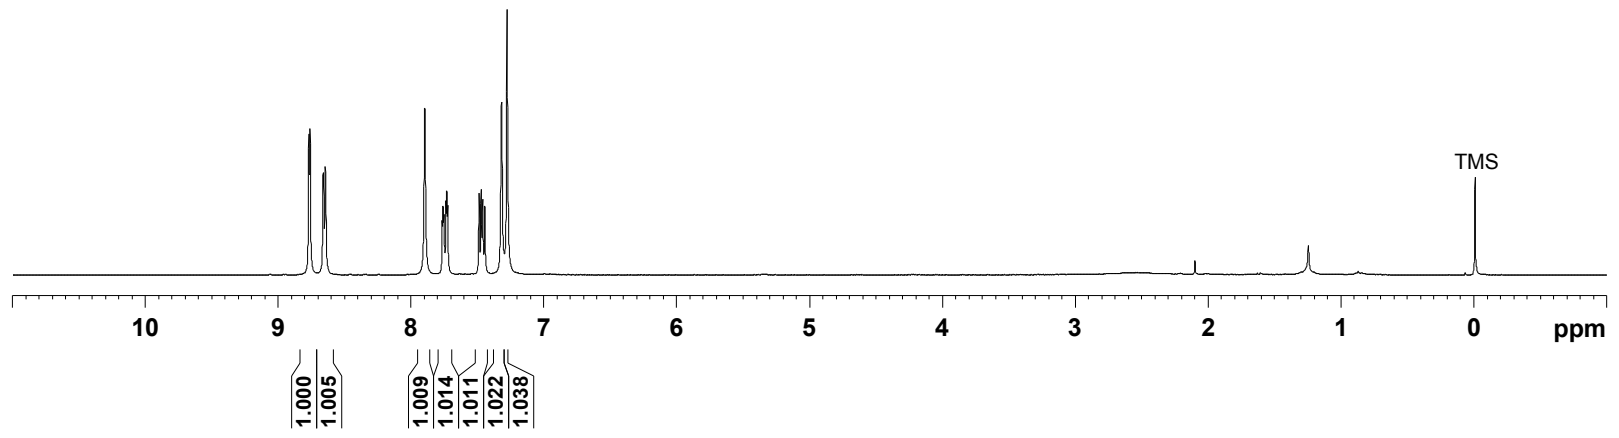

<sup>13</sup>C-NMR (300 MHz, CDCl<sub>3</sub> with 0.03% v/v TMS)

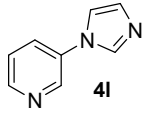

— 148.85  
— 142.95  
— 135.52  
— 133.84  
— 131.18  
— 128.86  
— 124.31  
— 118.08

77.47  
77.05  
76.63

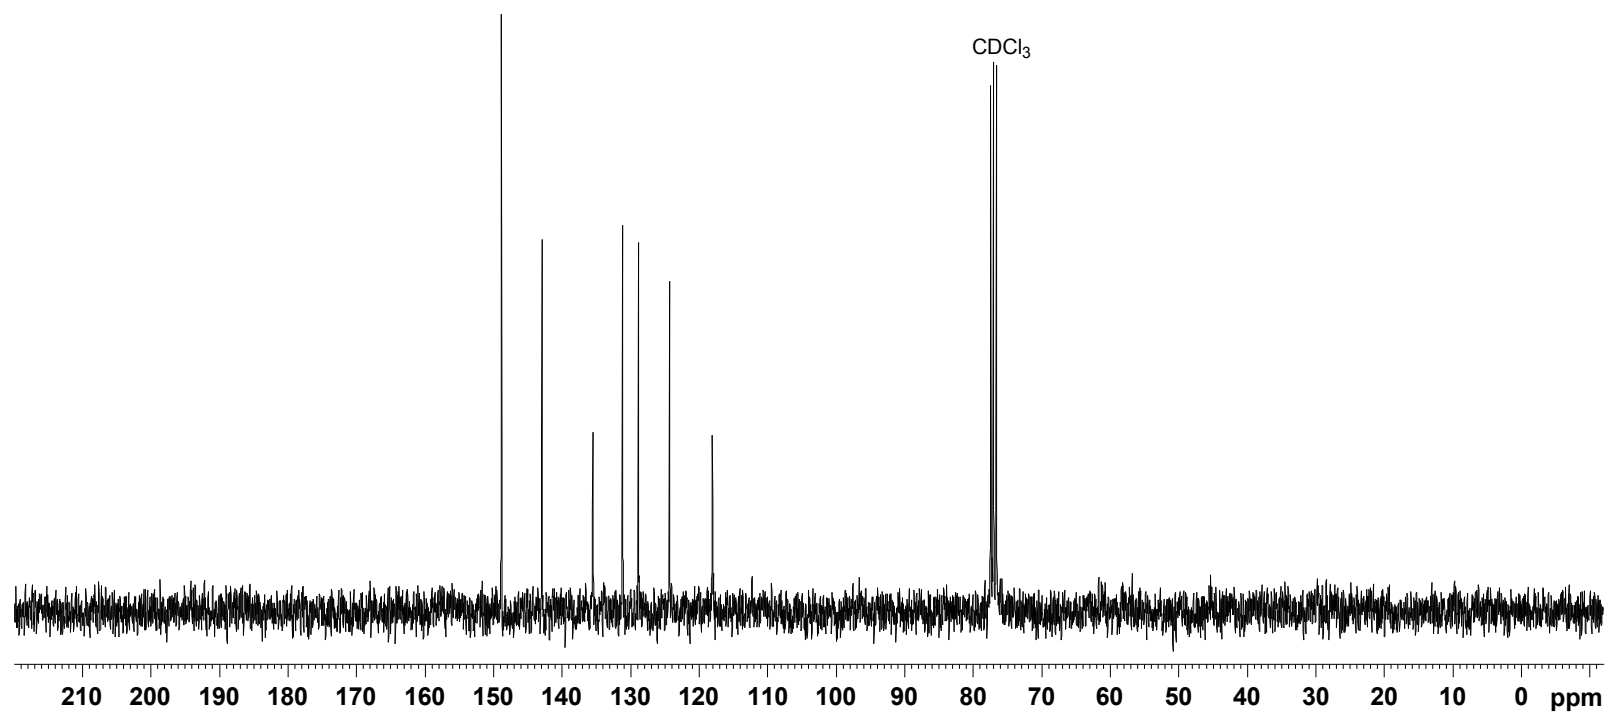

<sup>1</sup>H-NMR (300 MHz, CDCl<sub>3</sub> with 0.03% v/v TMS)

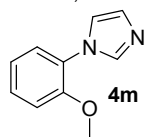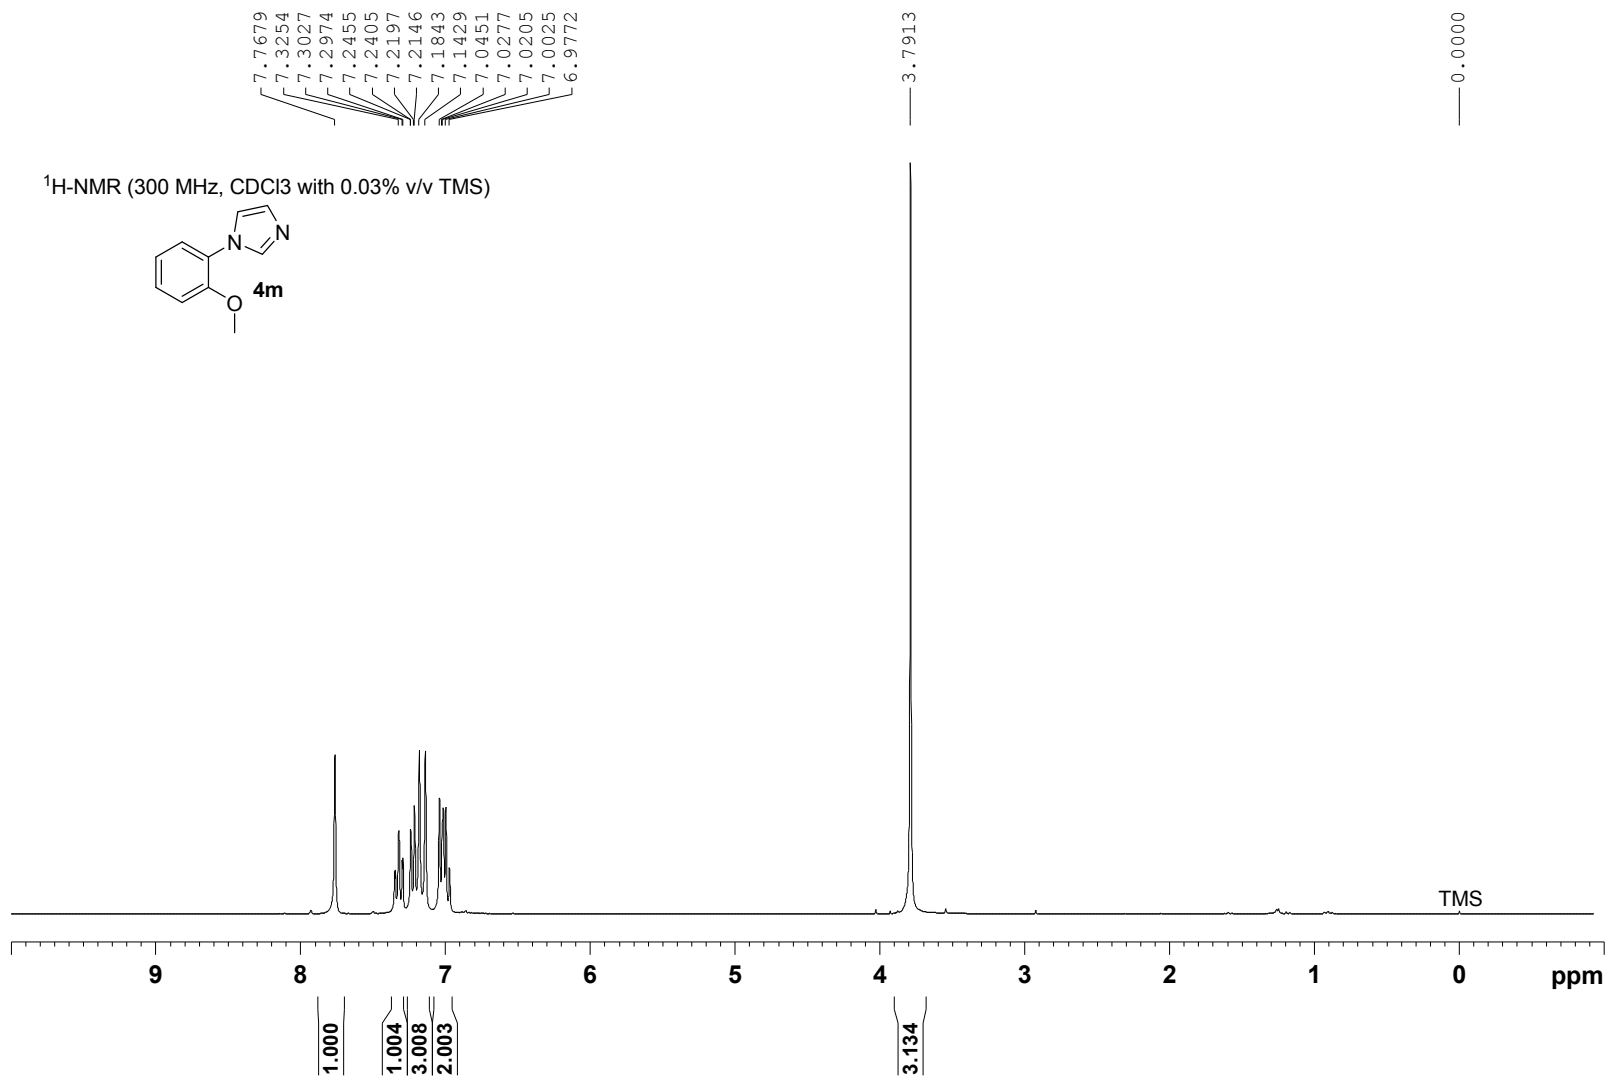

<sup>13</sup>C-NMR (300 MHz, CDCl<sub>3</sub> with 0.03% v/v TMS)

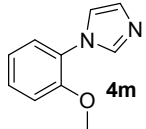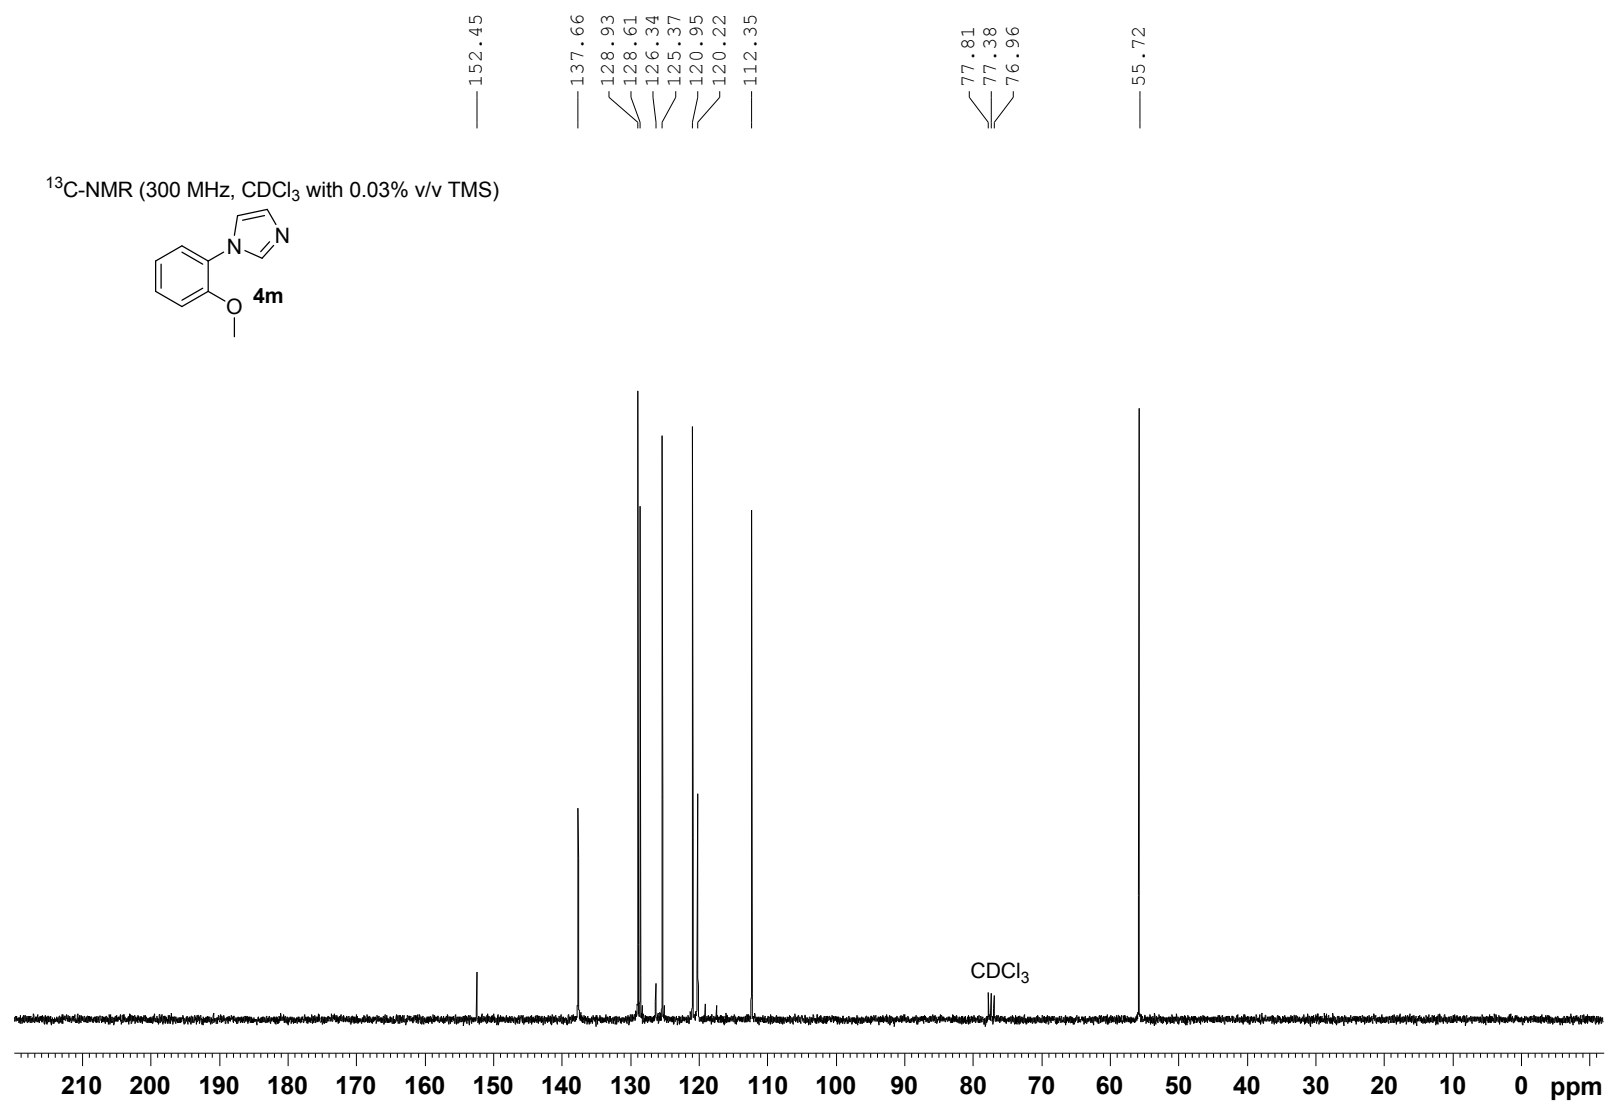



<sup>1</sup>H-NMR (300 MHz, DMSO-*d*<sub>6</sub> with 0.03% v/v TMS)

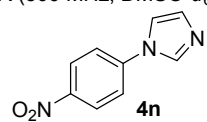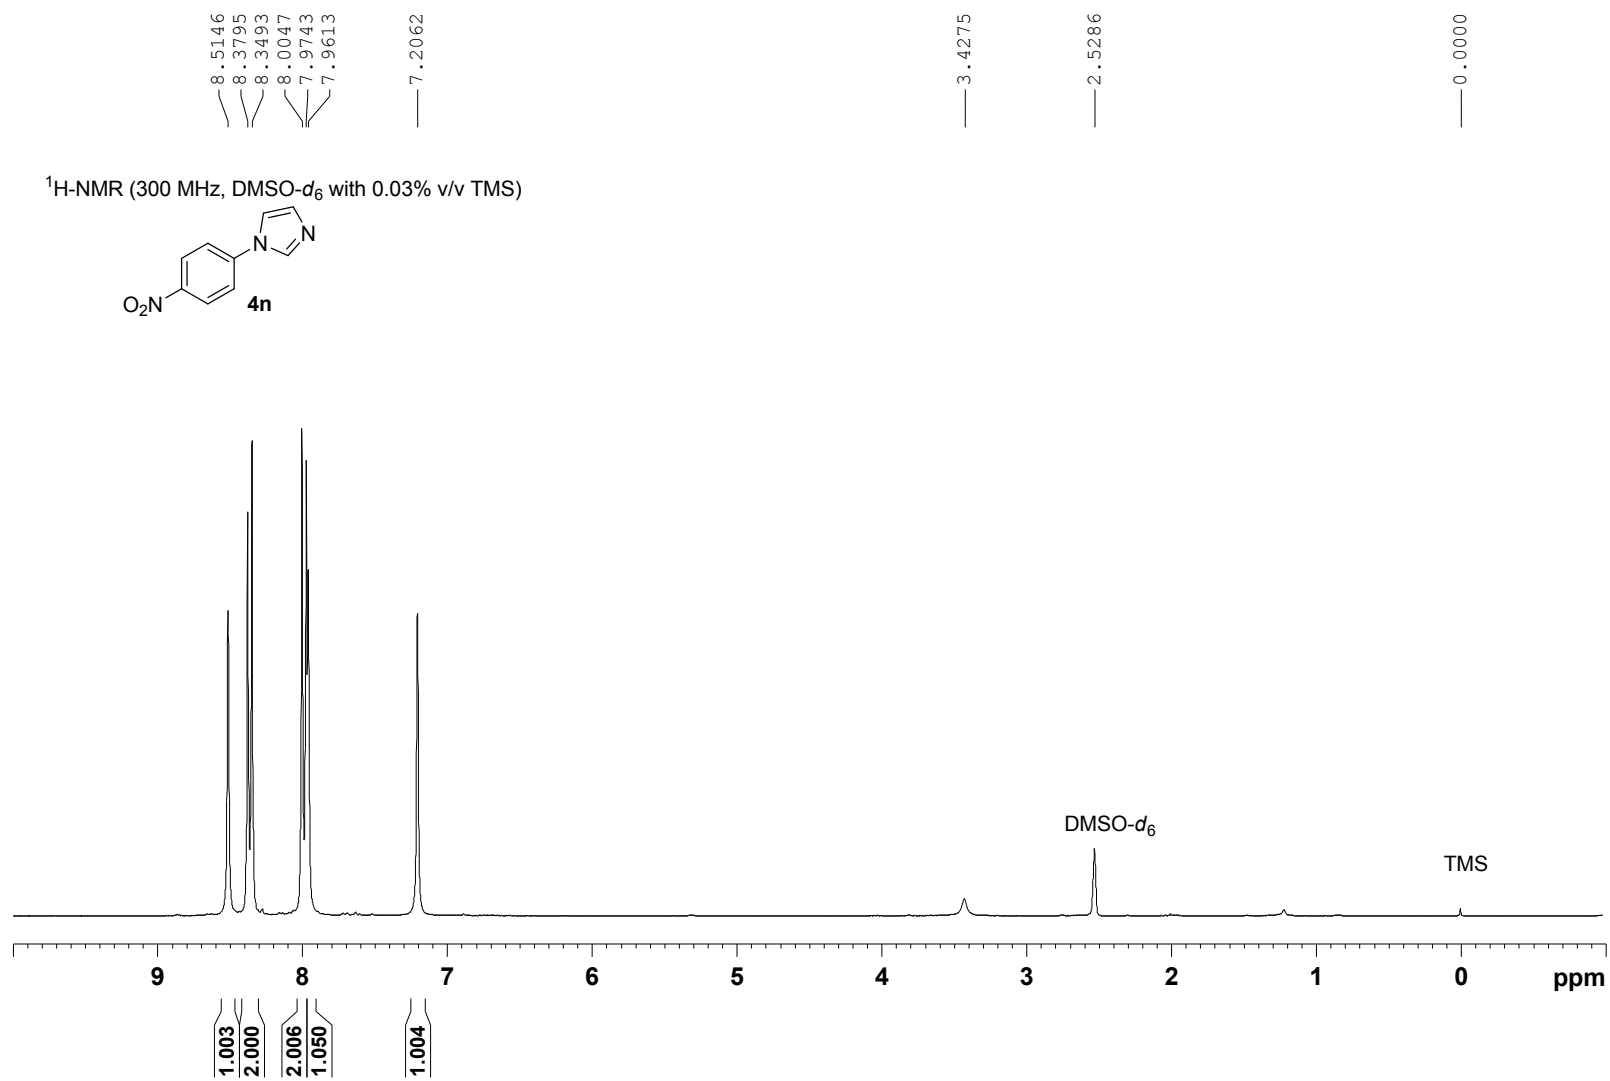

<sup>13</sup>C-NMR (300 MHz, DMSO-*d*<sub>6</sub> with 0.03% v/v TMS)

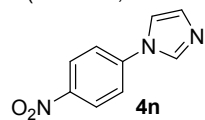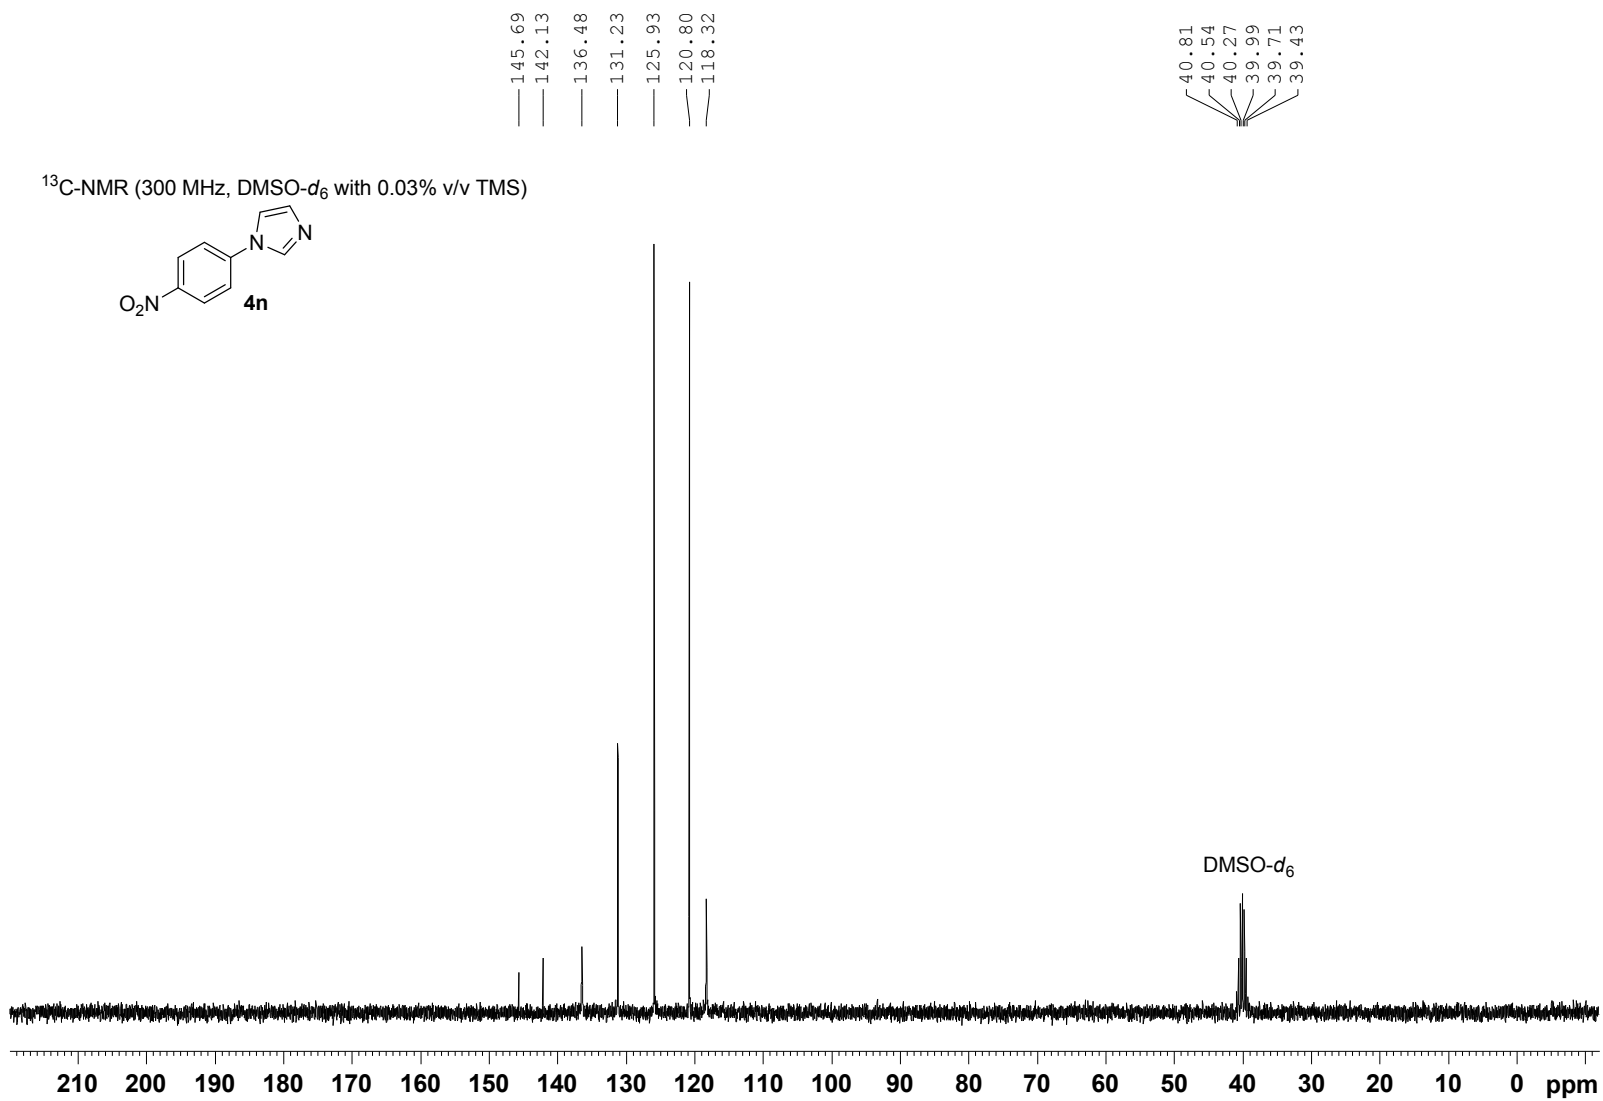

<sup>1</sup>H-NMR (300 MHz, CDCl<sub>3</sub> with 0.03% v/v TMS)

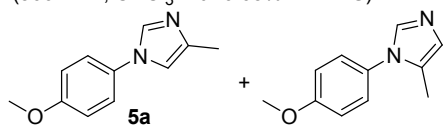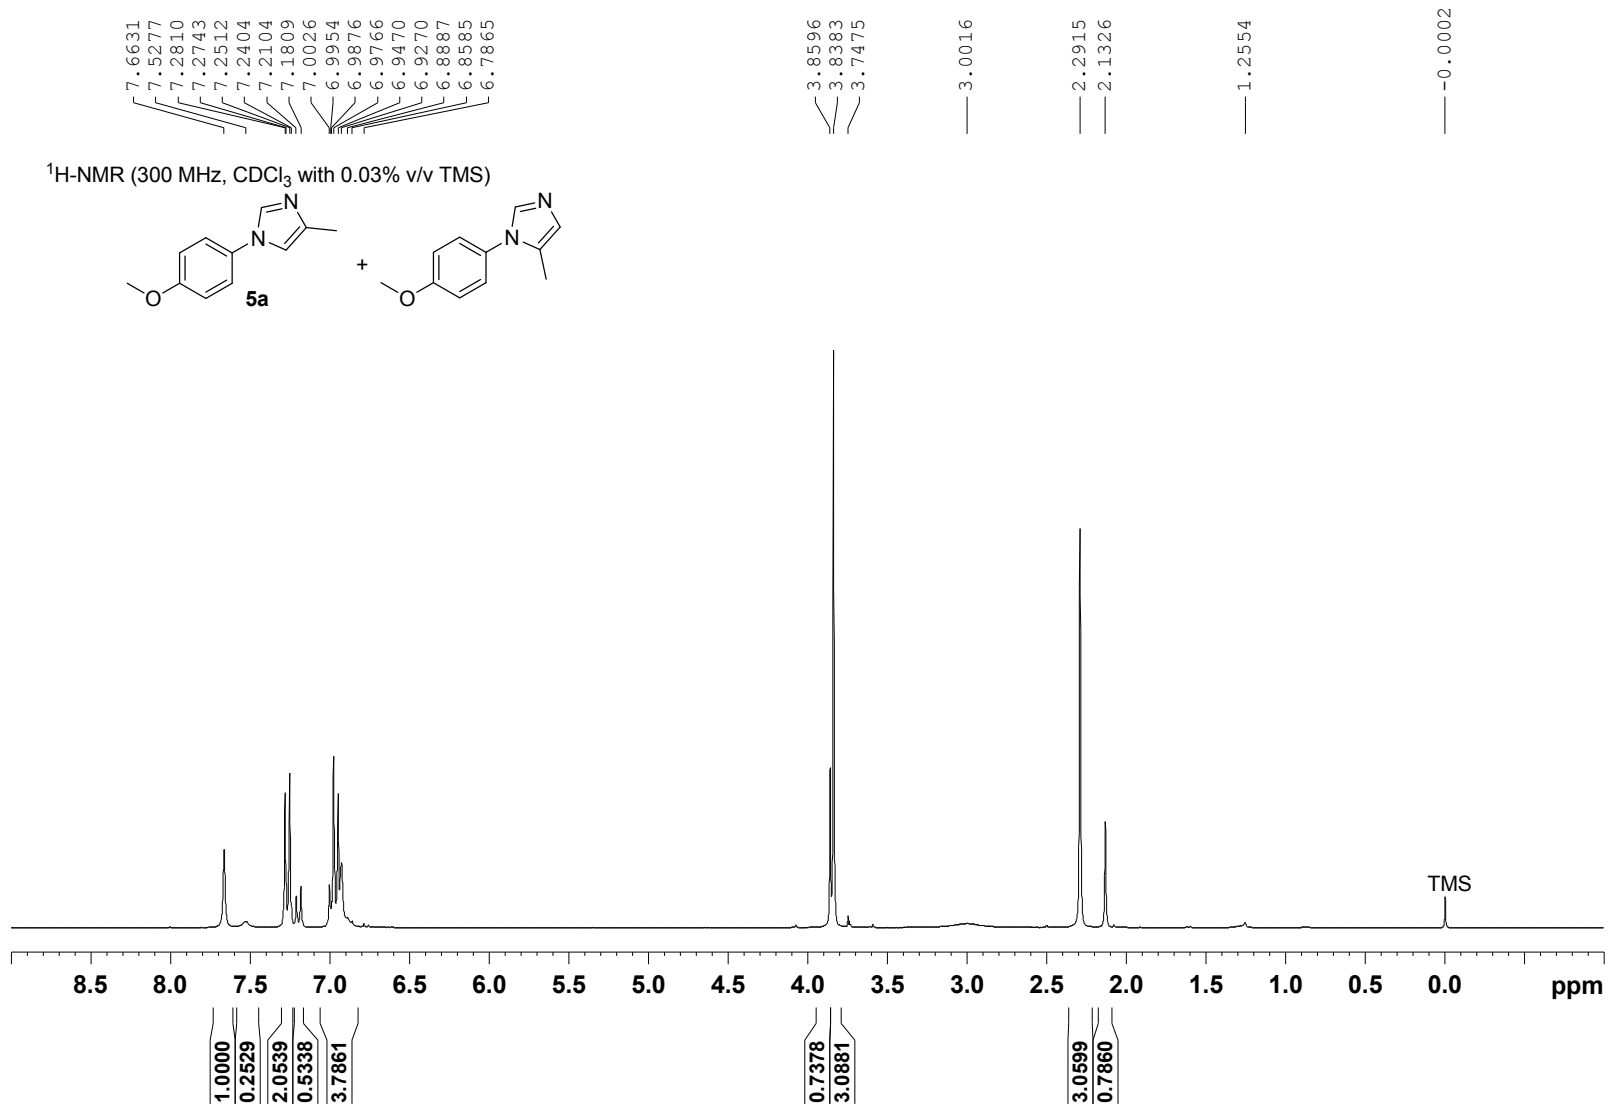

<sup>1</sup>H-NMR (300 MHz, CDCl<sub>3</sub> with 0.03% v/v TMS)

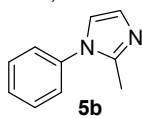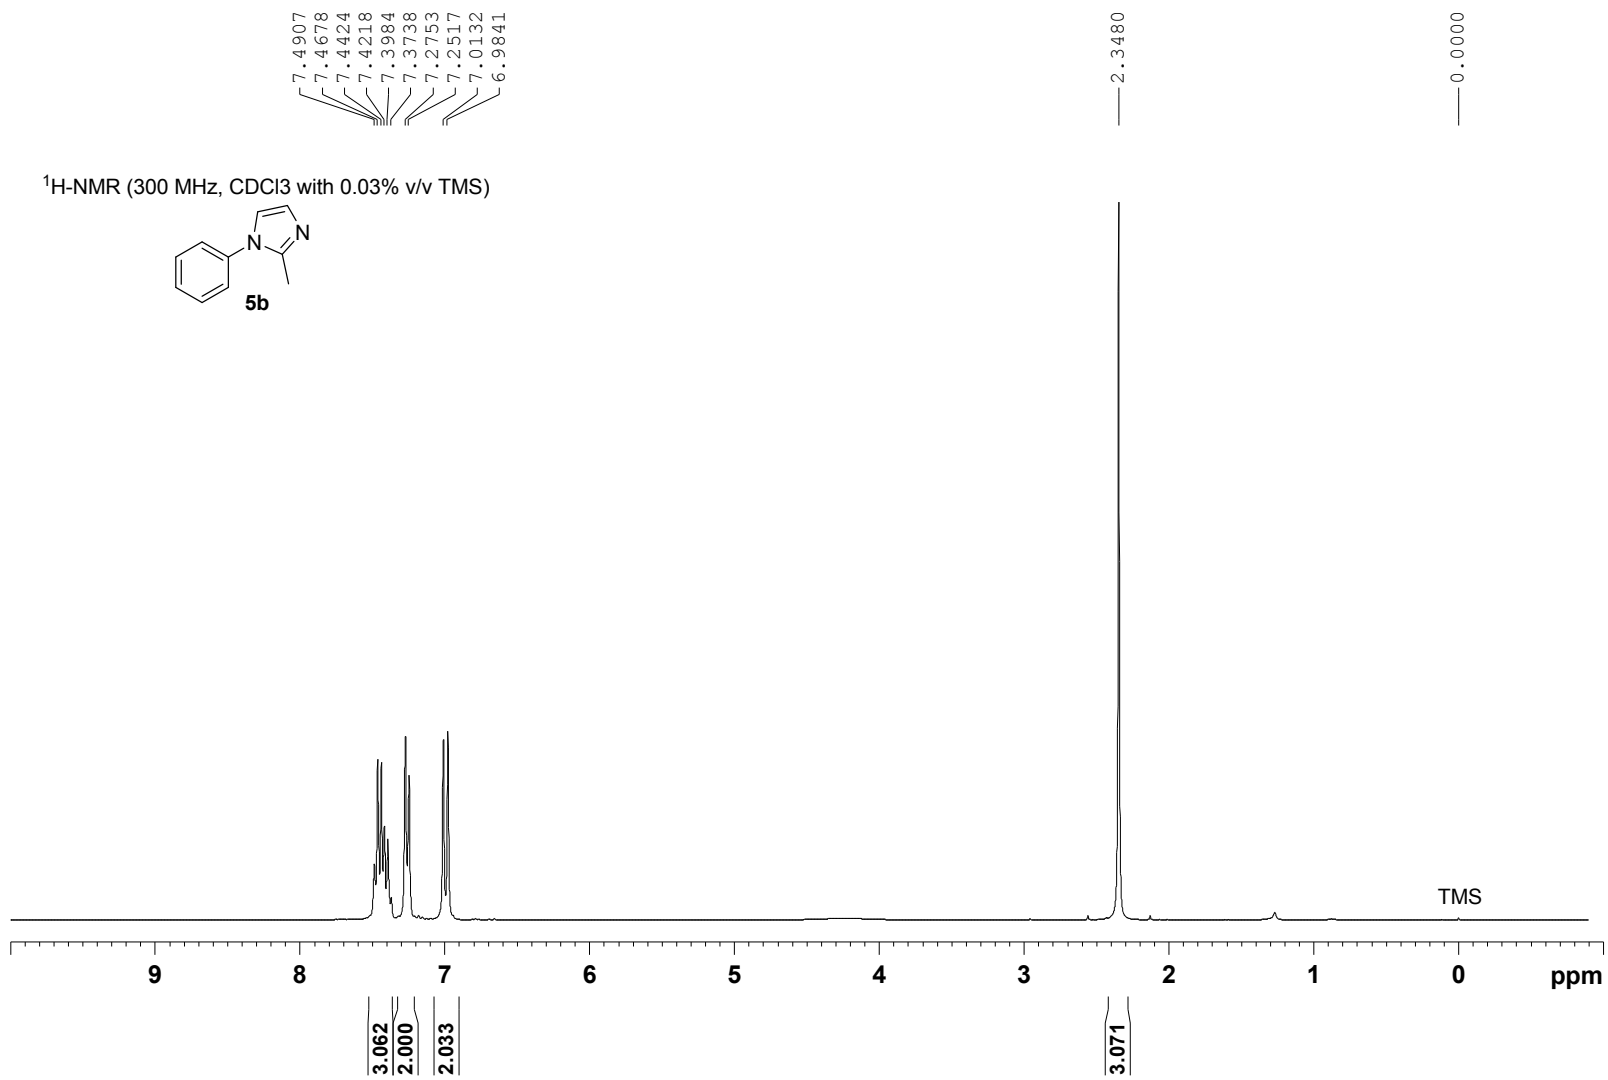

<sup>13</sup>C-NMR (300 MHz, CDCl<sub>3</sub> with 0.03% v/v TMS)

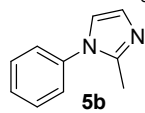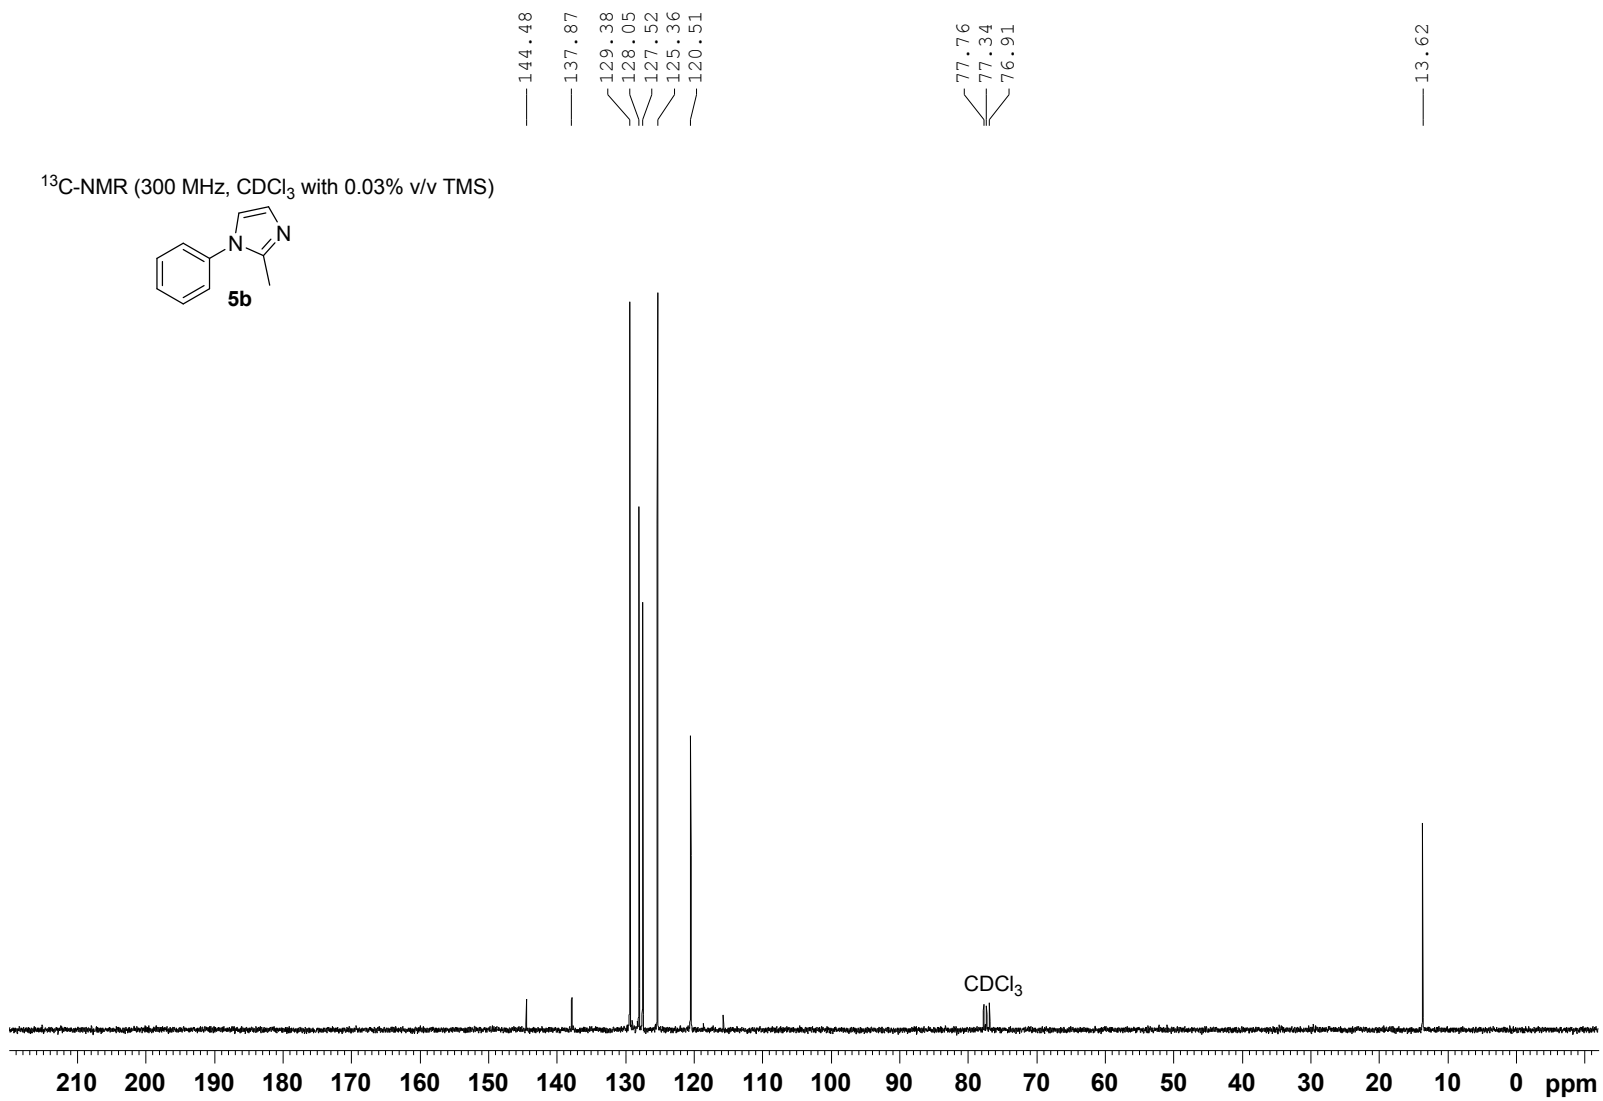

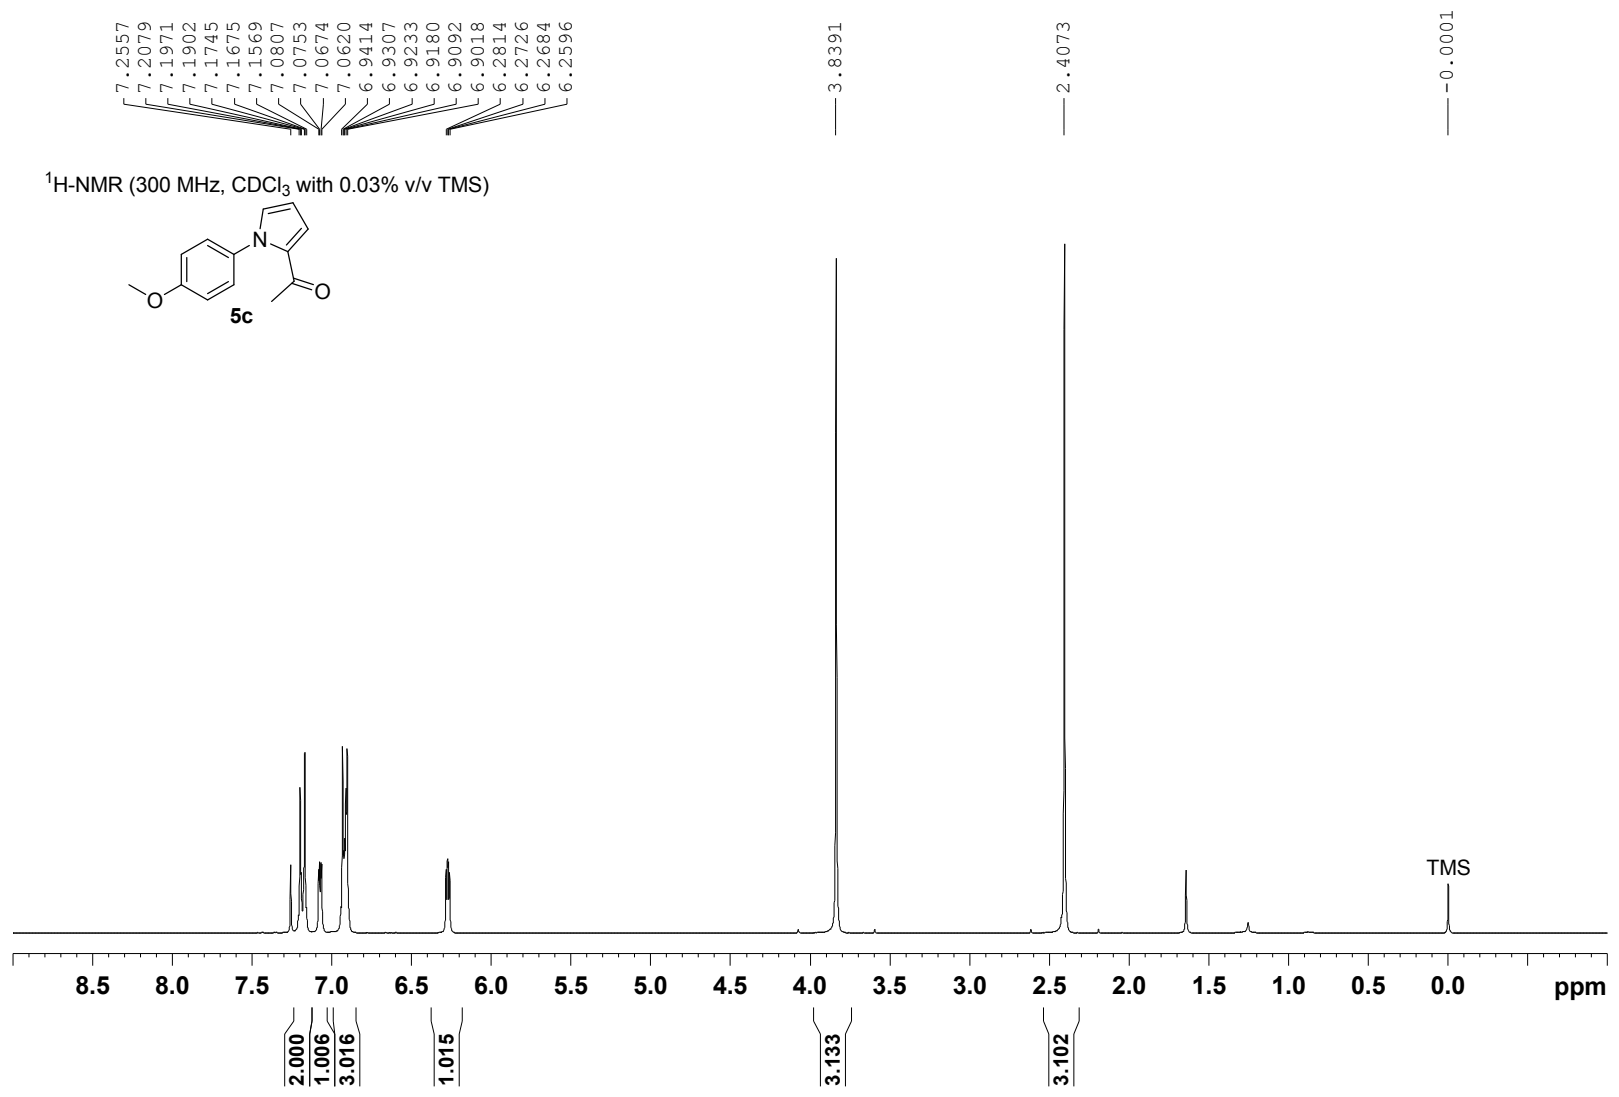

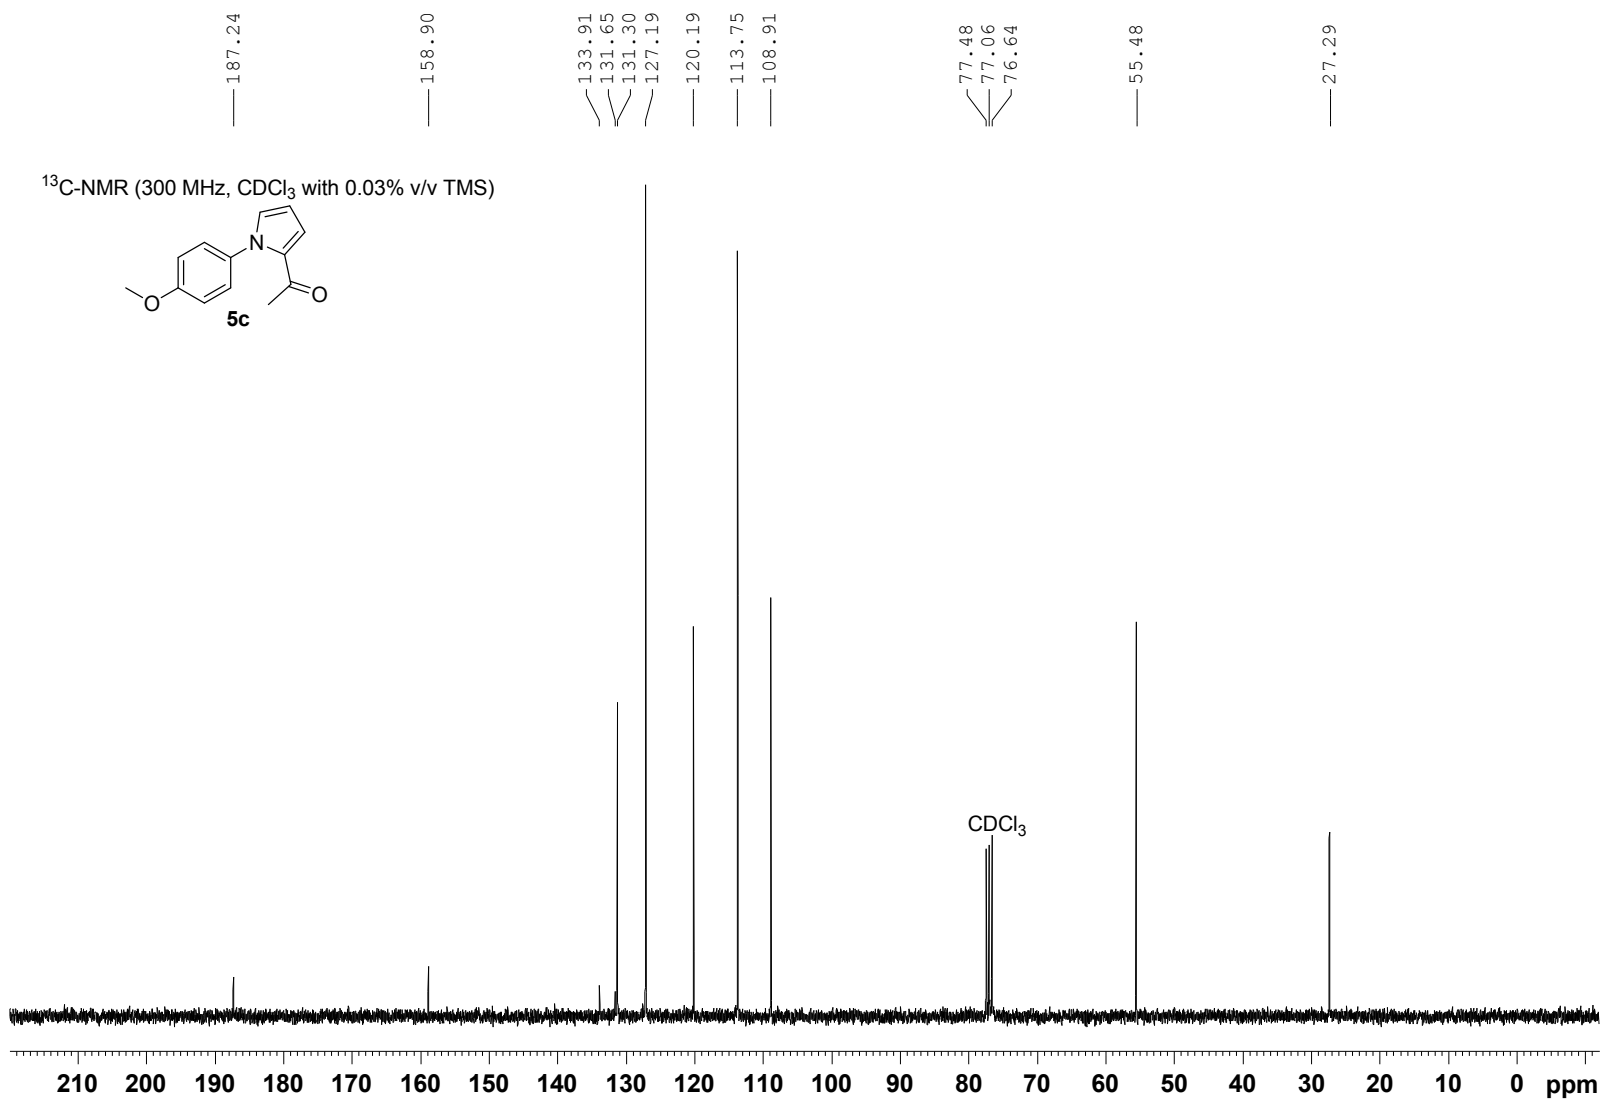

8.1893  
7.7855  
7.7585  
7.7307  
7.7058  
7.5316  
7.5063  
7.4795  
7.4176  
7.3916  
7.3662  
7.3510  
7.3263  
7.3016  
7.2201  
7.2110  
7.1950  
7.1705

— 0.0001

<sup>1</sup>H-NMR (300 MHz, CDCl<sub>3</sub> with 0.03% v/v TMS)

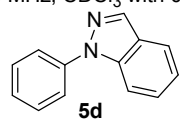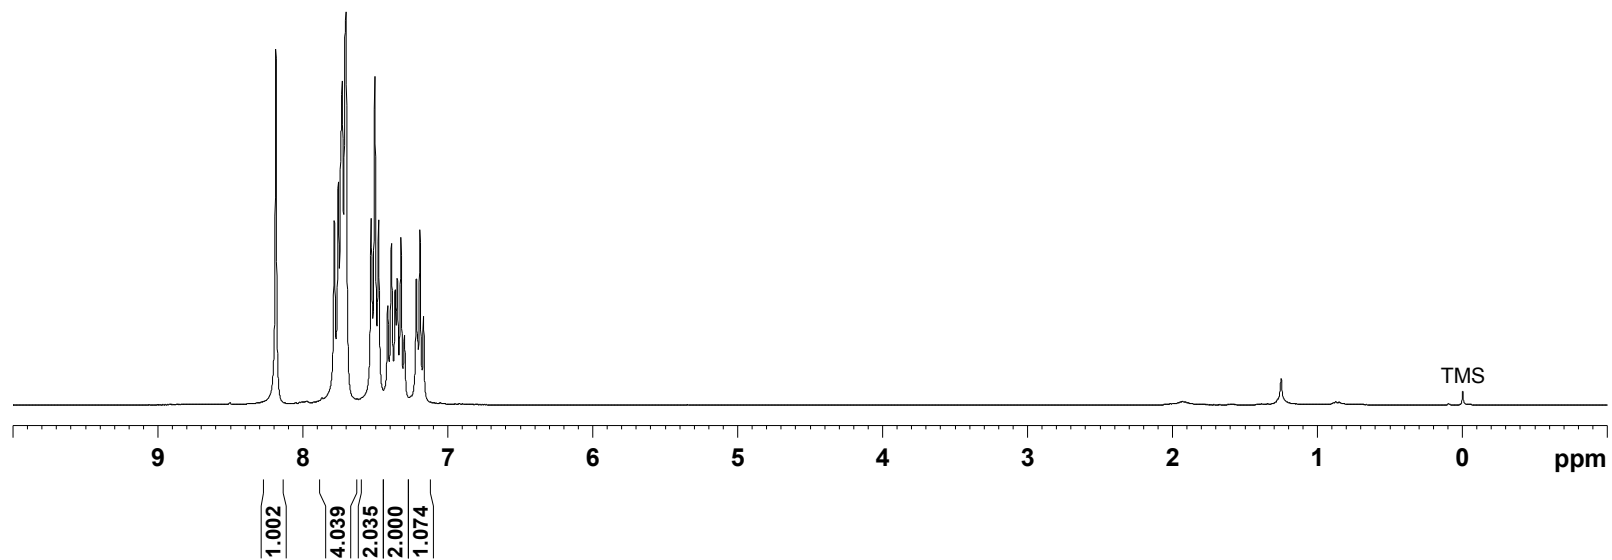



<sup>13</sup>C-NMR (300 MHz, CDCl<sub>3</sub> with 0.03% v/v TMS)

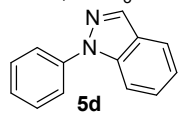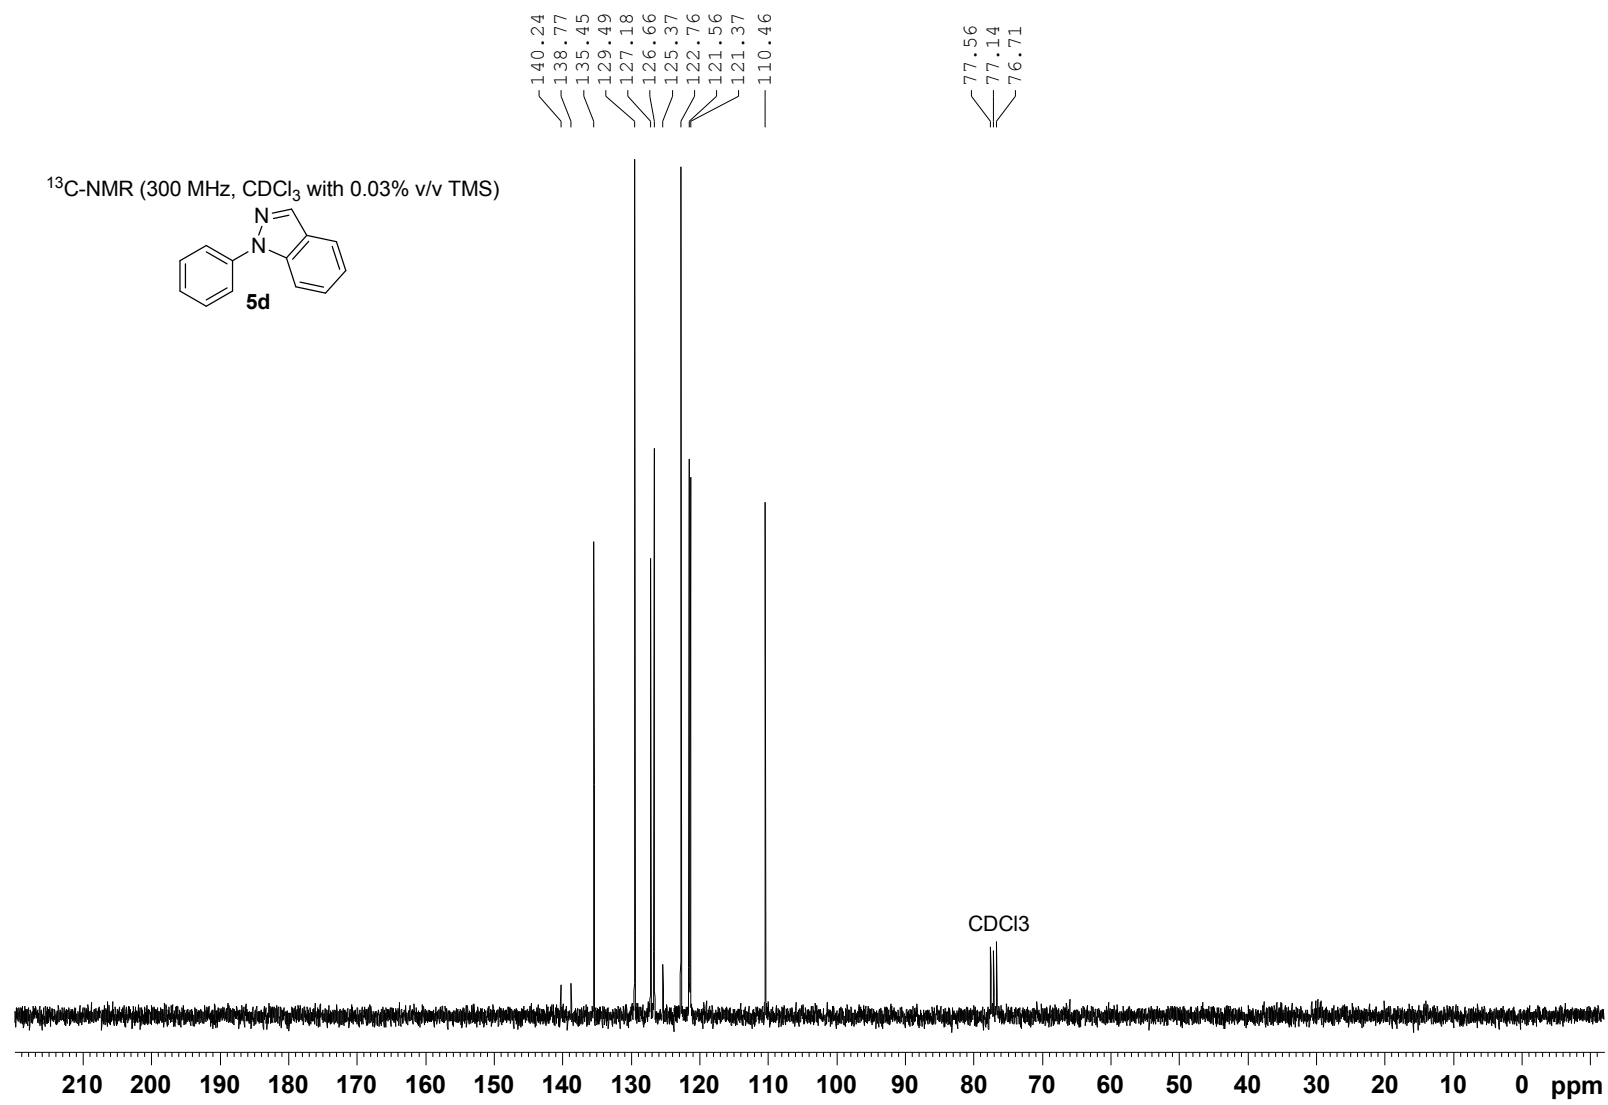

<sup>1</sup>H-NMR (300 MHz, CDCl<sub>3</sub> with 0.03% v/v TMS)

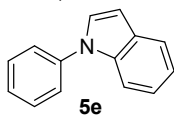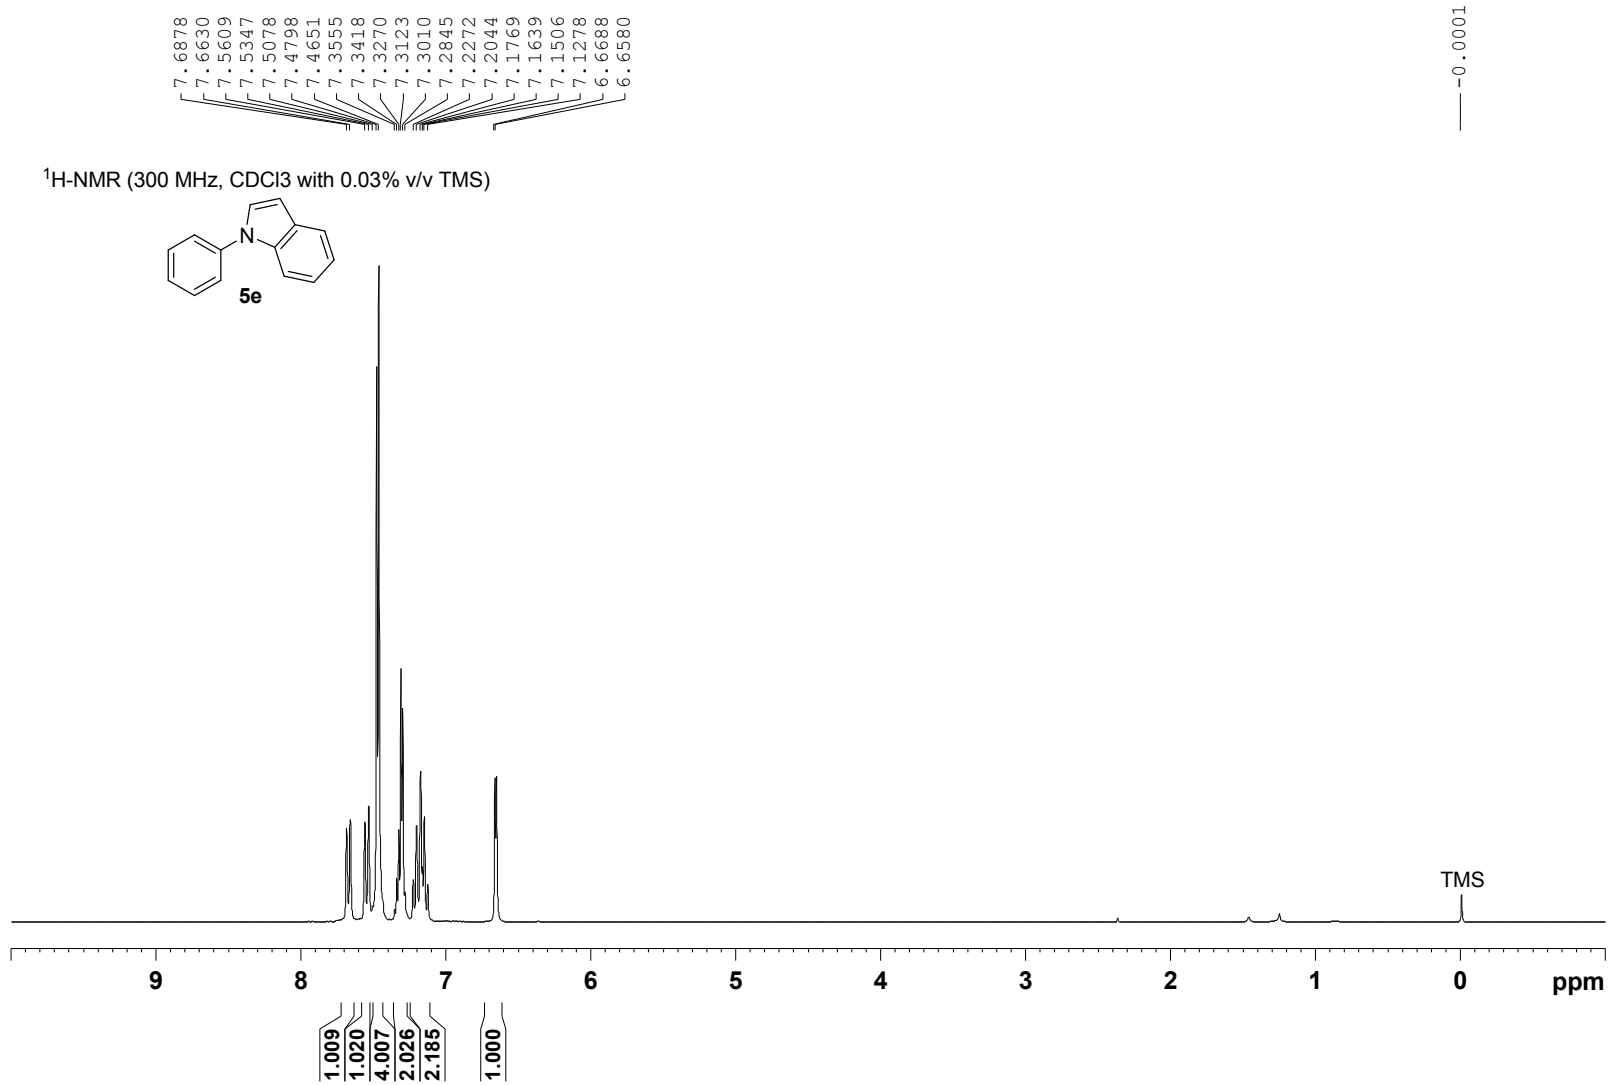

<sup>13</sup>C-NMR (300 MHz, CDCl<sub>3</sub> with 0.03% v/v TMS)

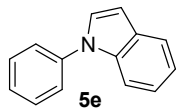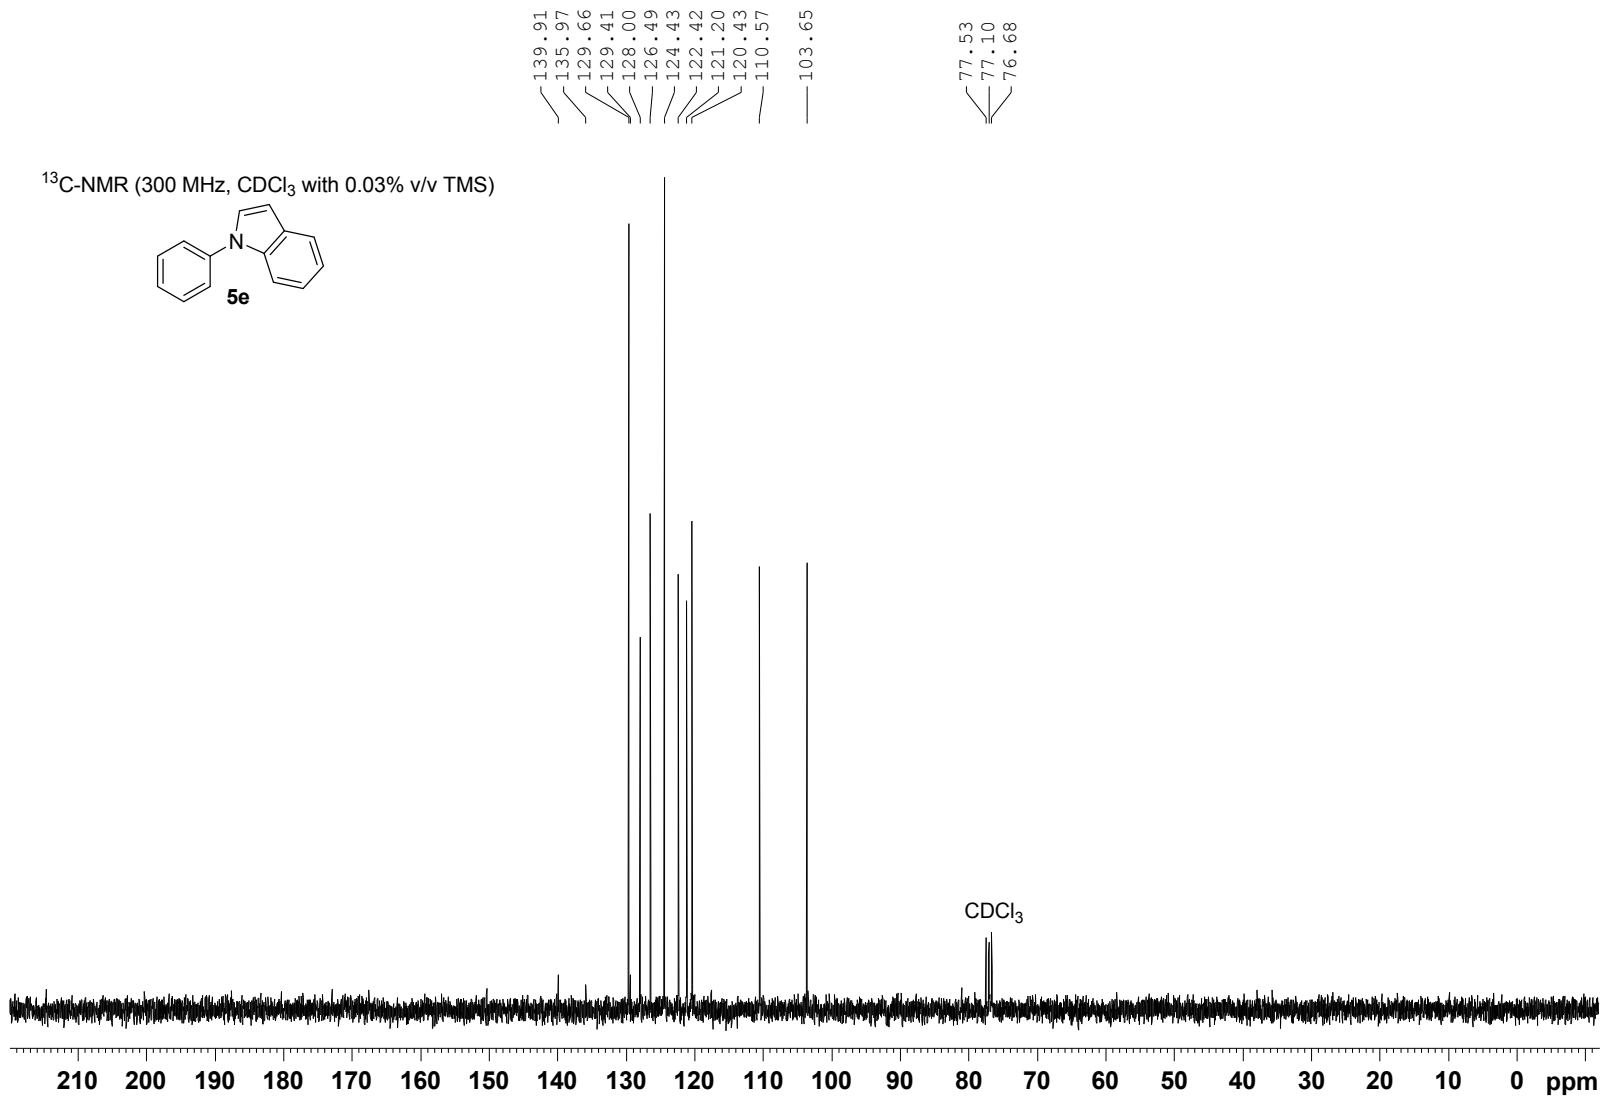

7.5622  
7.5516  
7.5335  
7.5000  
7.4729  
7.4494  
7.4331  
7.4087  
7.3443  
7.3210  
7.2977  
7.2751  
7.2643  
7.2336  
7.2282  
7.1999  
7.1944  
7.1738  
6.9504  
6.9433  
6.9204  
6.9137  
6.8901  
6.8831  
6.6294  
6.6186

<sup>1</sup>H-NMR (300 MHz, CDCl<sub>3</sub> with 0.03% v/v TMS)

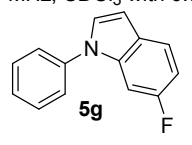

— -0.0001

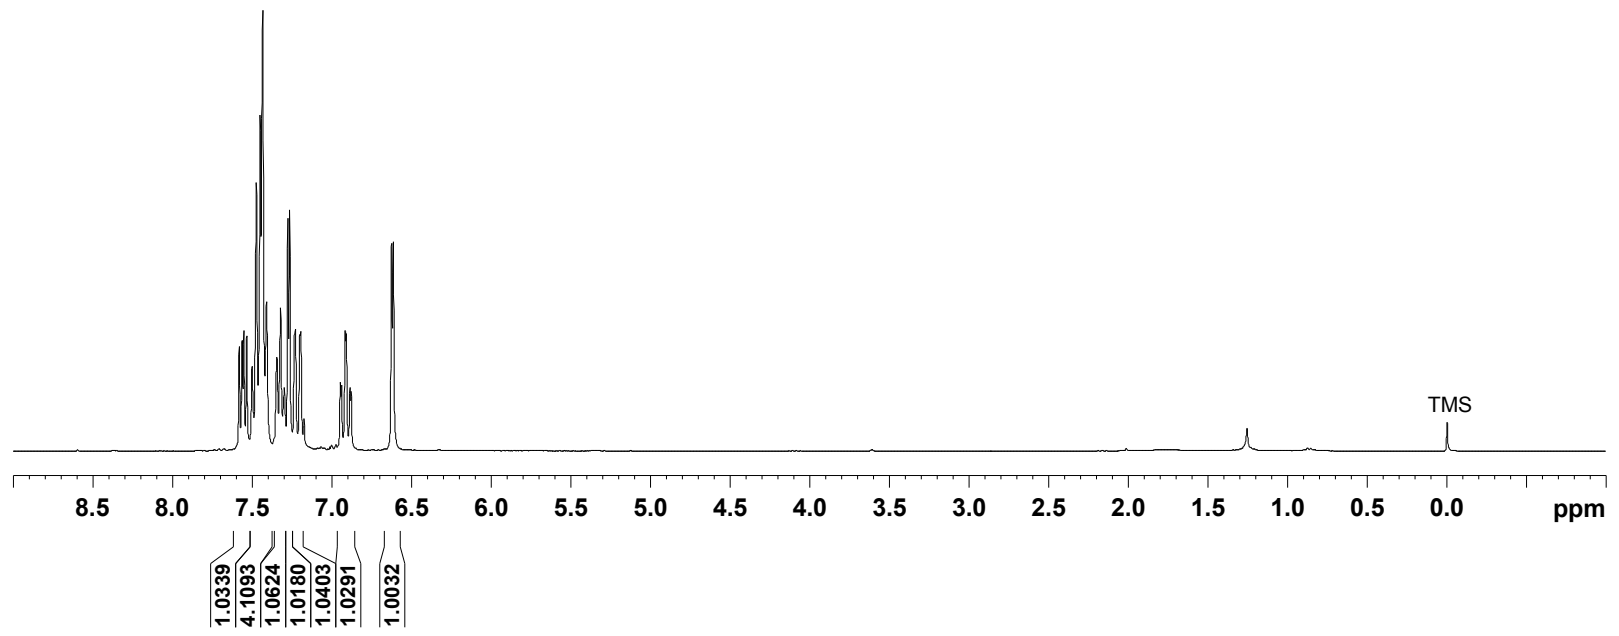

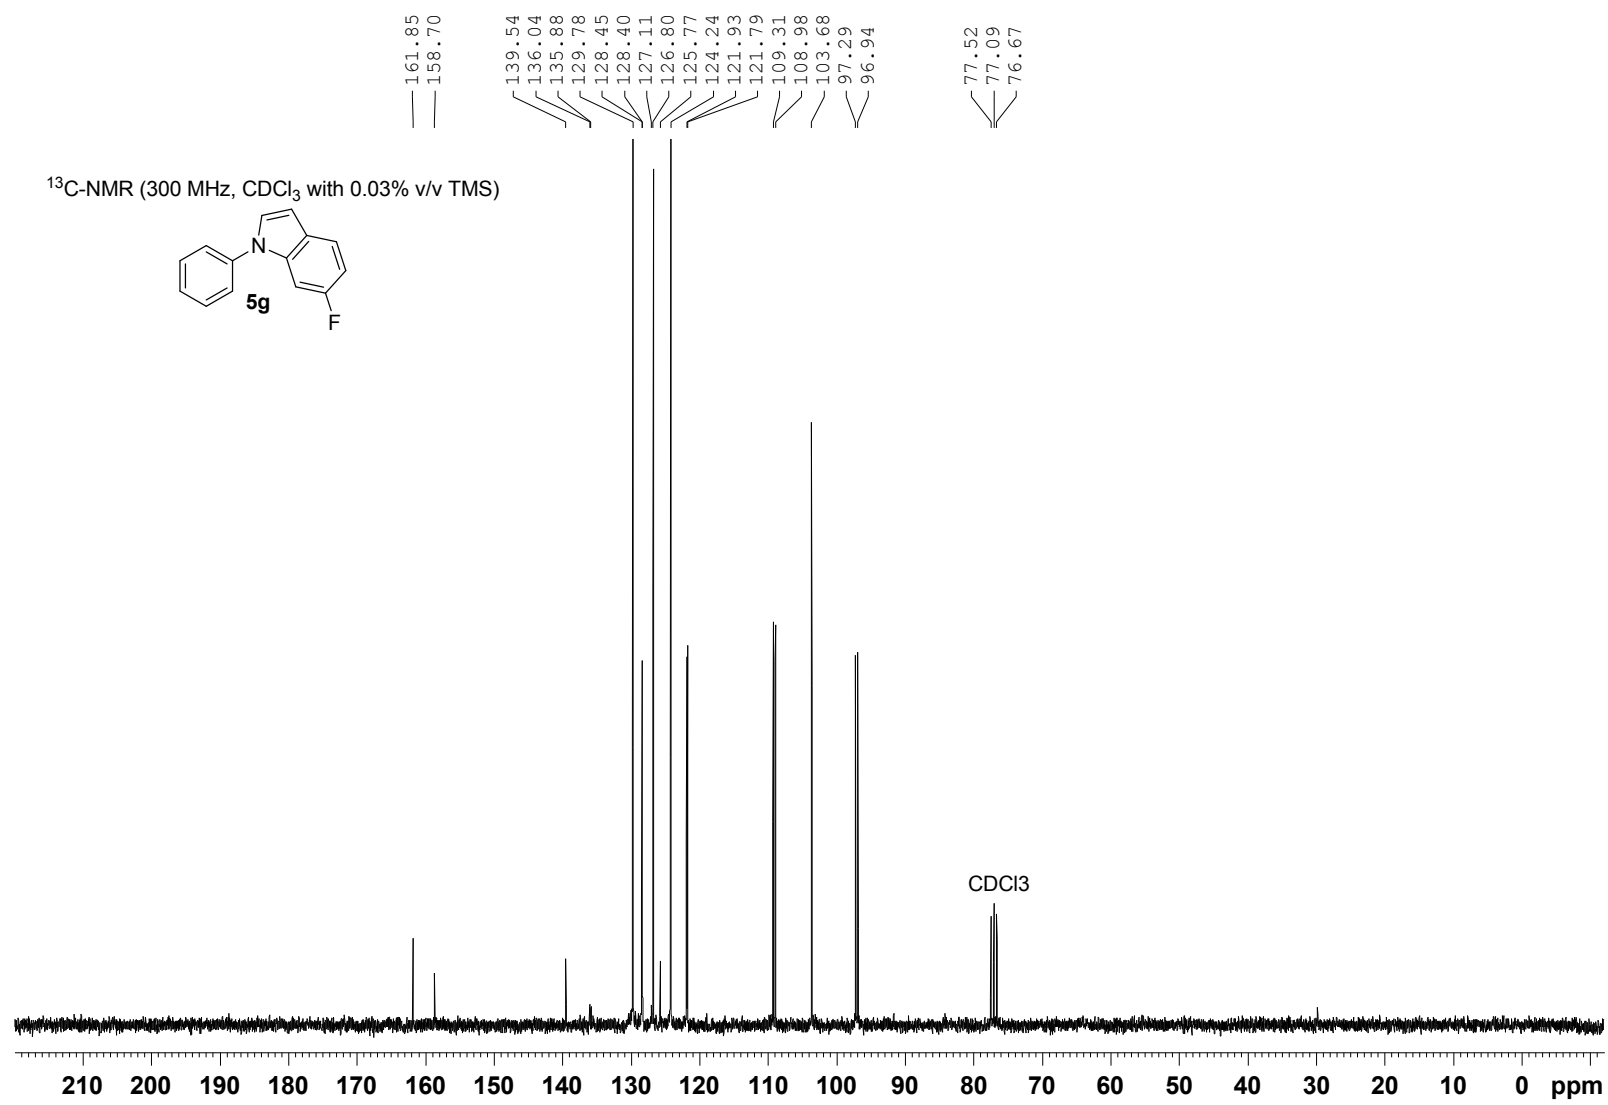

7.8861  
7.8785  
7.7106  
7.6837  
7.6572  
7.4364  
7.4112  
7.3839  
7.2698  
7.2450  
7.2205  
6.4328  
6.4259  
6.4195

0.0001

<sup>1</sup>H-NMR (300 MHz, CDCl<sub>3</sub> with 0.03% v/v TMS)

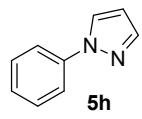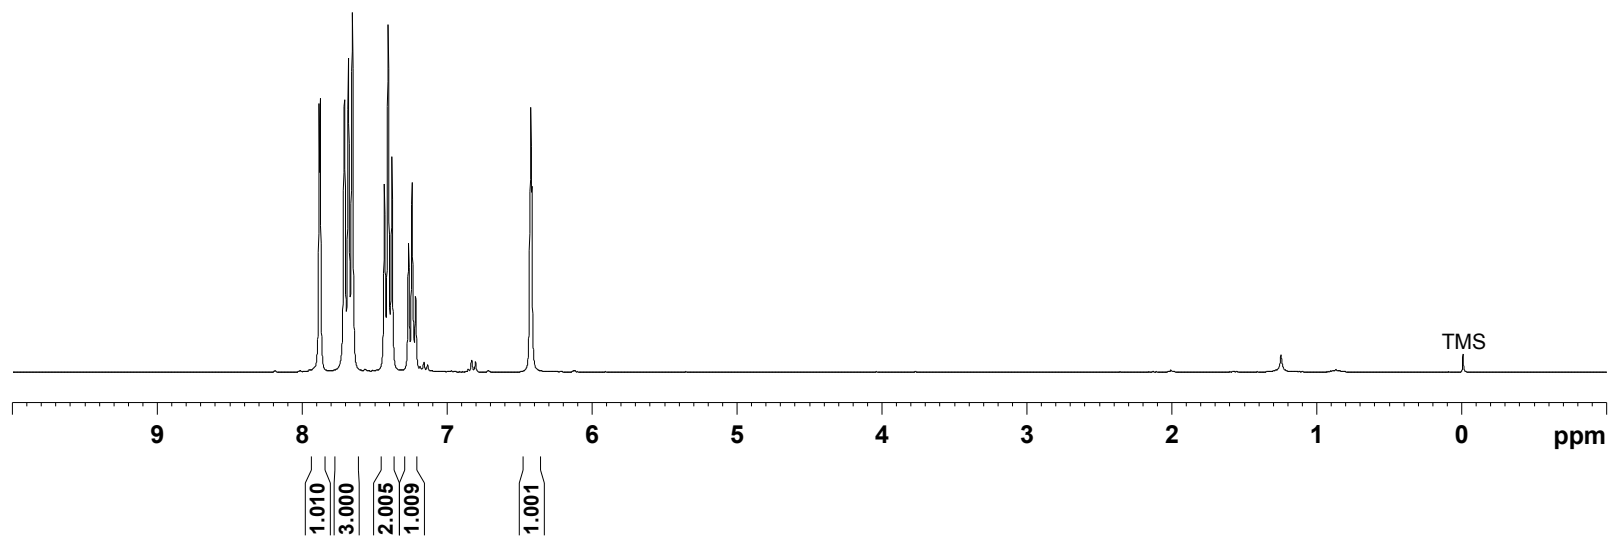

<sup>13</sup>C-NMR (300 MHz, CDCl<sub>3</sub> with 0.03% v/v TMS)

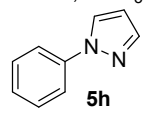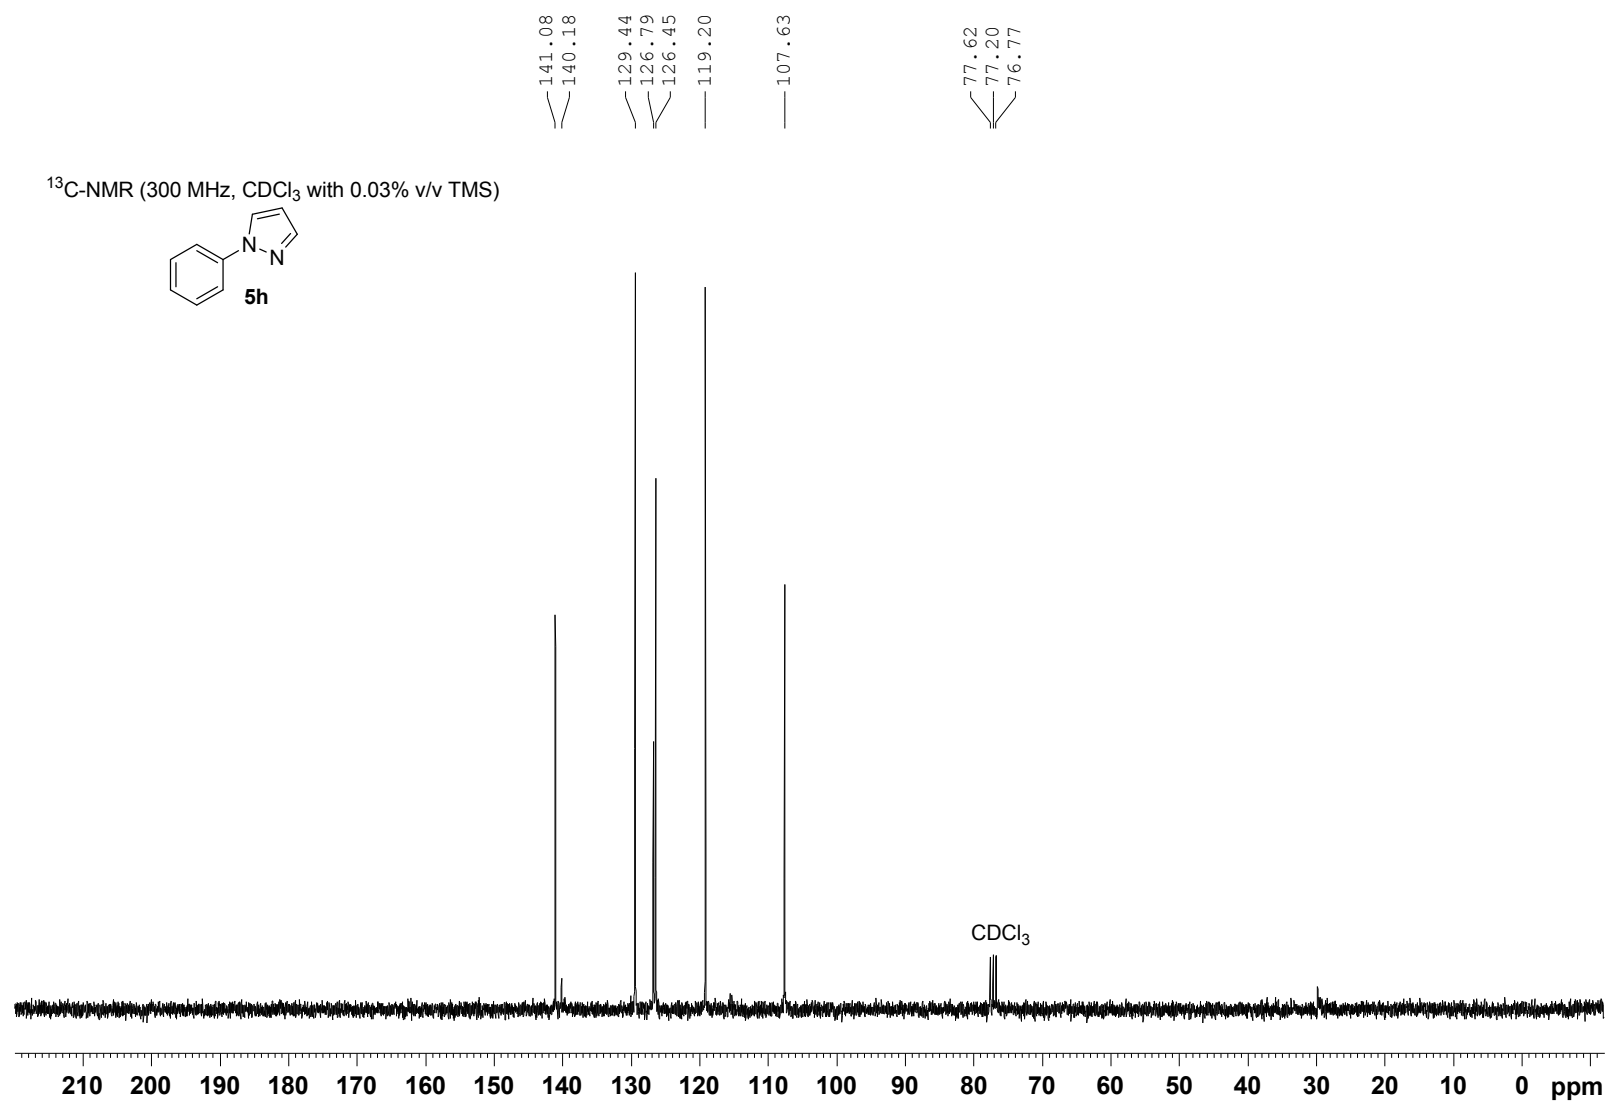

<sup>1</sup>H-NMR (300 MHz, CDCl<sub>3</sub> with 0.03% v/v TMS)

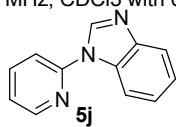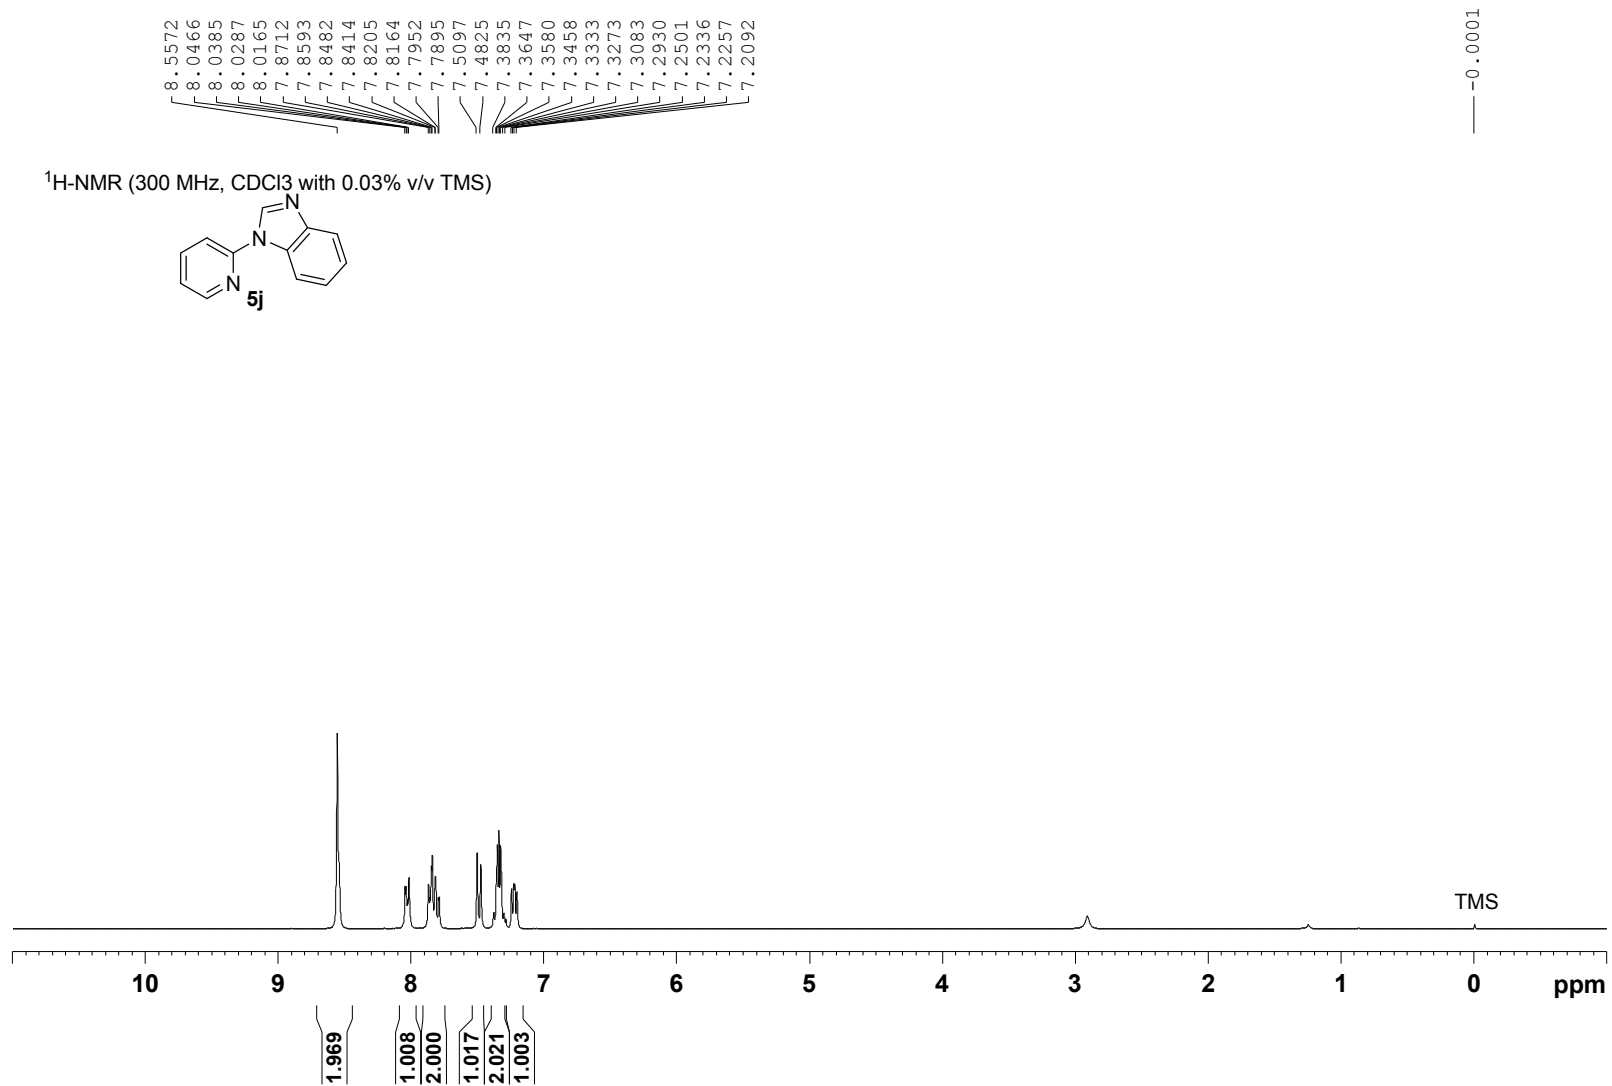



149.80  
149.39  
144.60  
141.32  
138.92  
132.09  
124.20  
123.27  
121.82  
120.56  
114.26  
112.70  
77.61  
77.19  
76.77

<sup>13</sup>C-NMR (300 MHz, CDCl<sub>3</sub> with 0.03% v/v TMS)

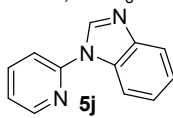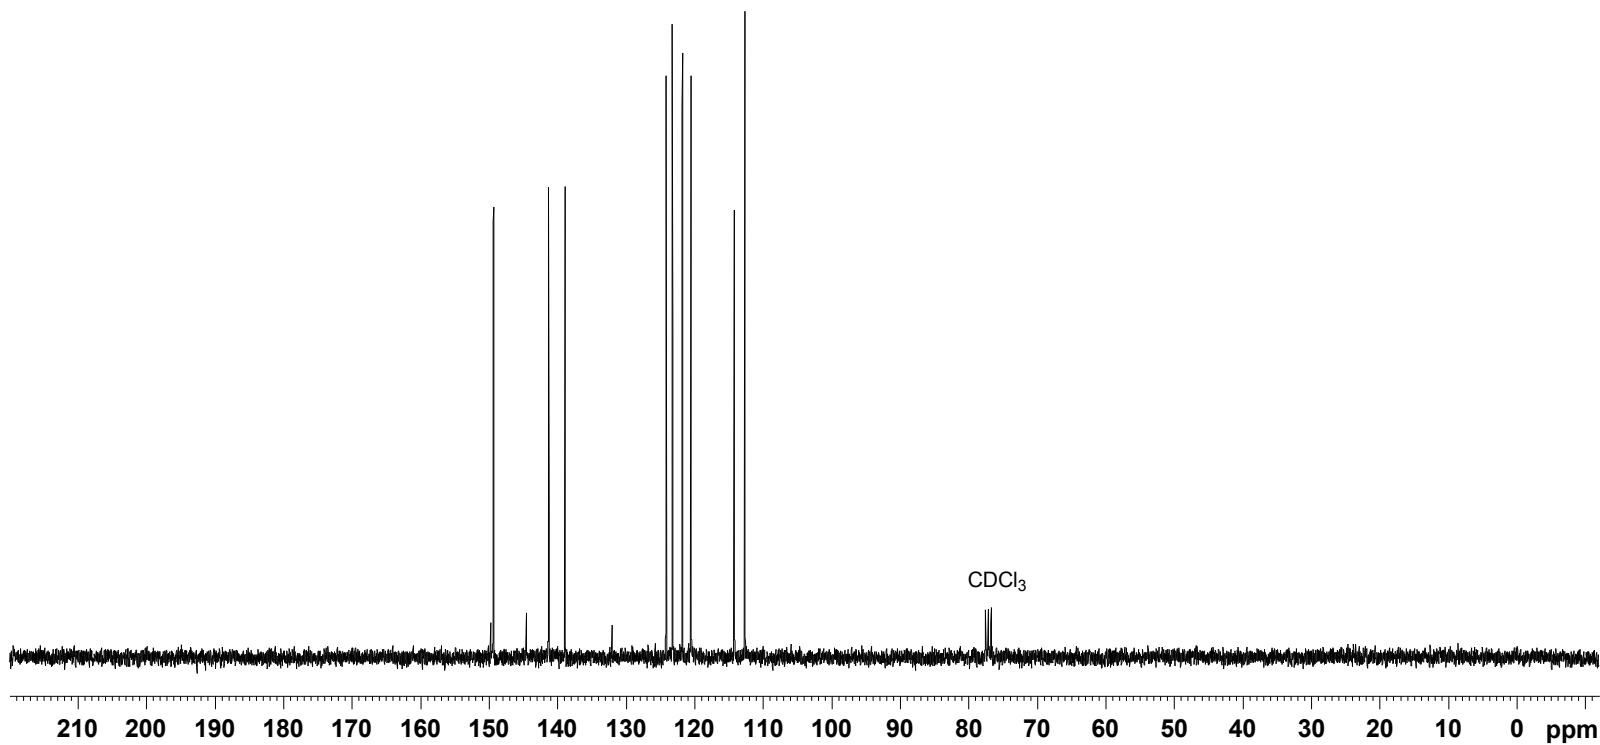

<sup>1</sup>H-NMR (300 MHz, CDCl<sub>3</sub> with 0.03% v/v TMS)

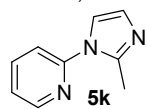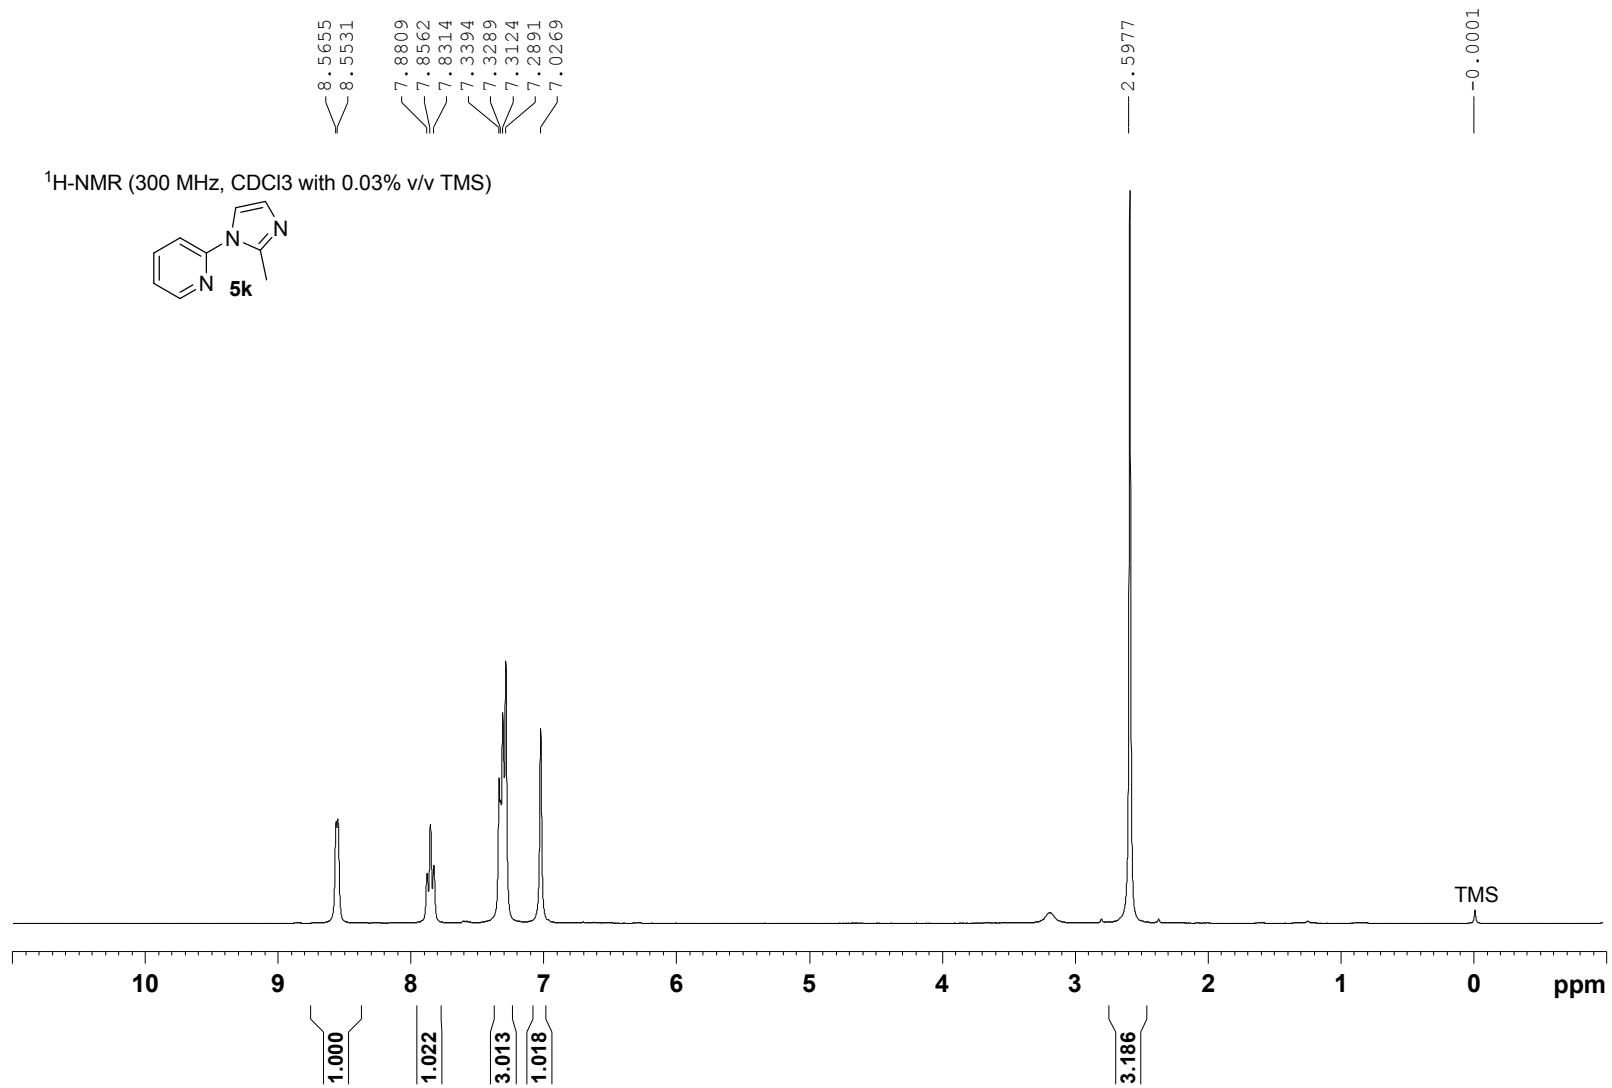

<sup>13</sup>C-NMR (300 MHz, CDCl<sub>3</sub> with 0.03% v/v TMS)

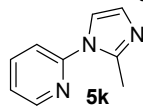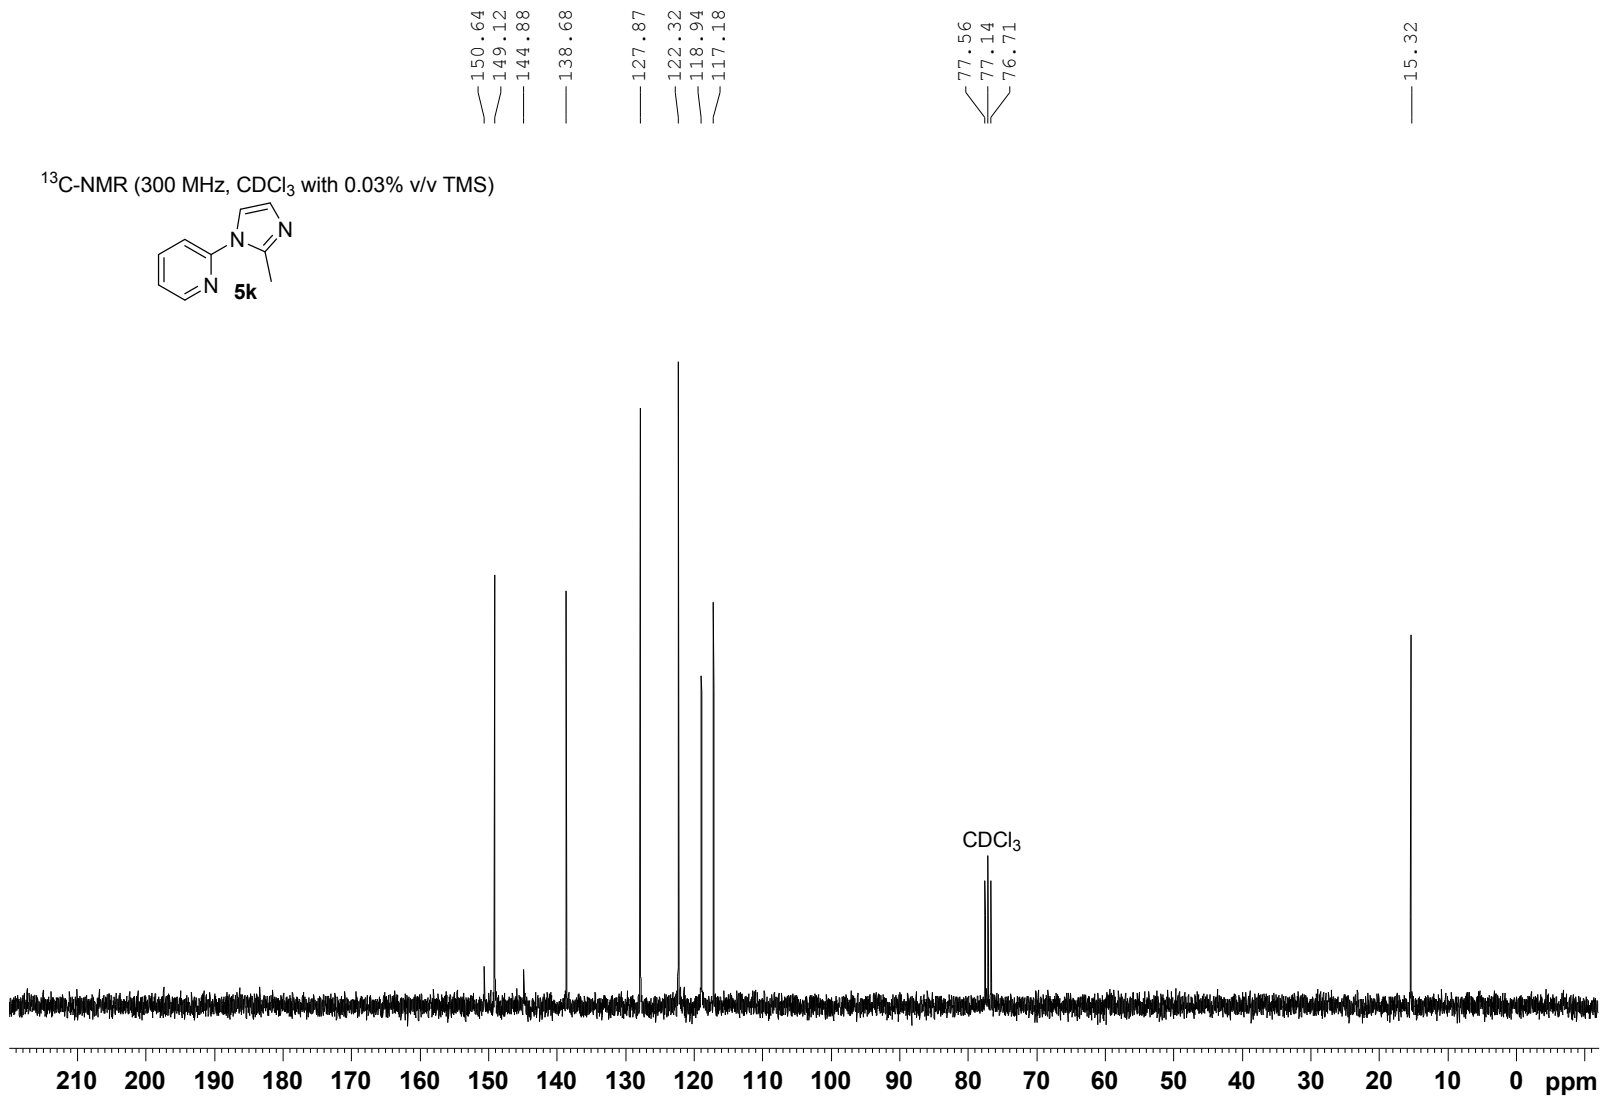

<sup>1</sup>H-NMR (300 MHz, CDCl<sub>3</sub> with 0.03% v/v TMS)

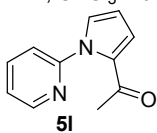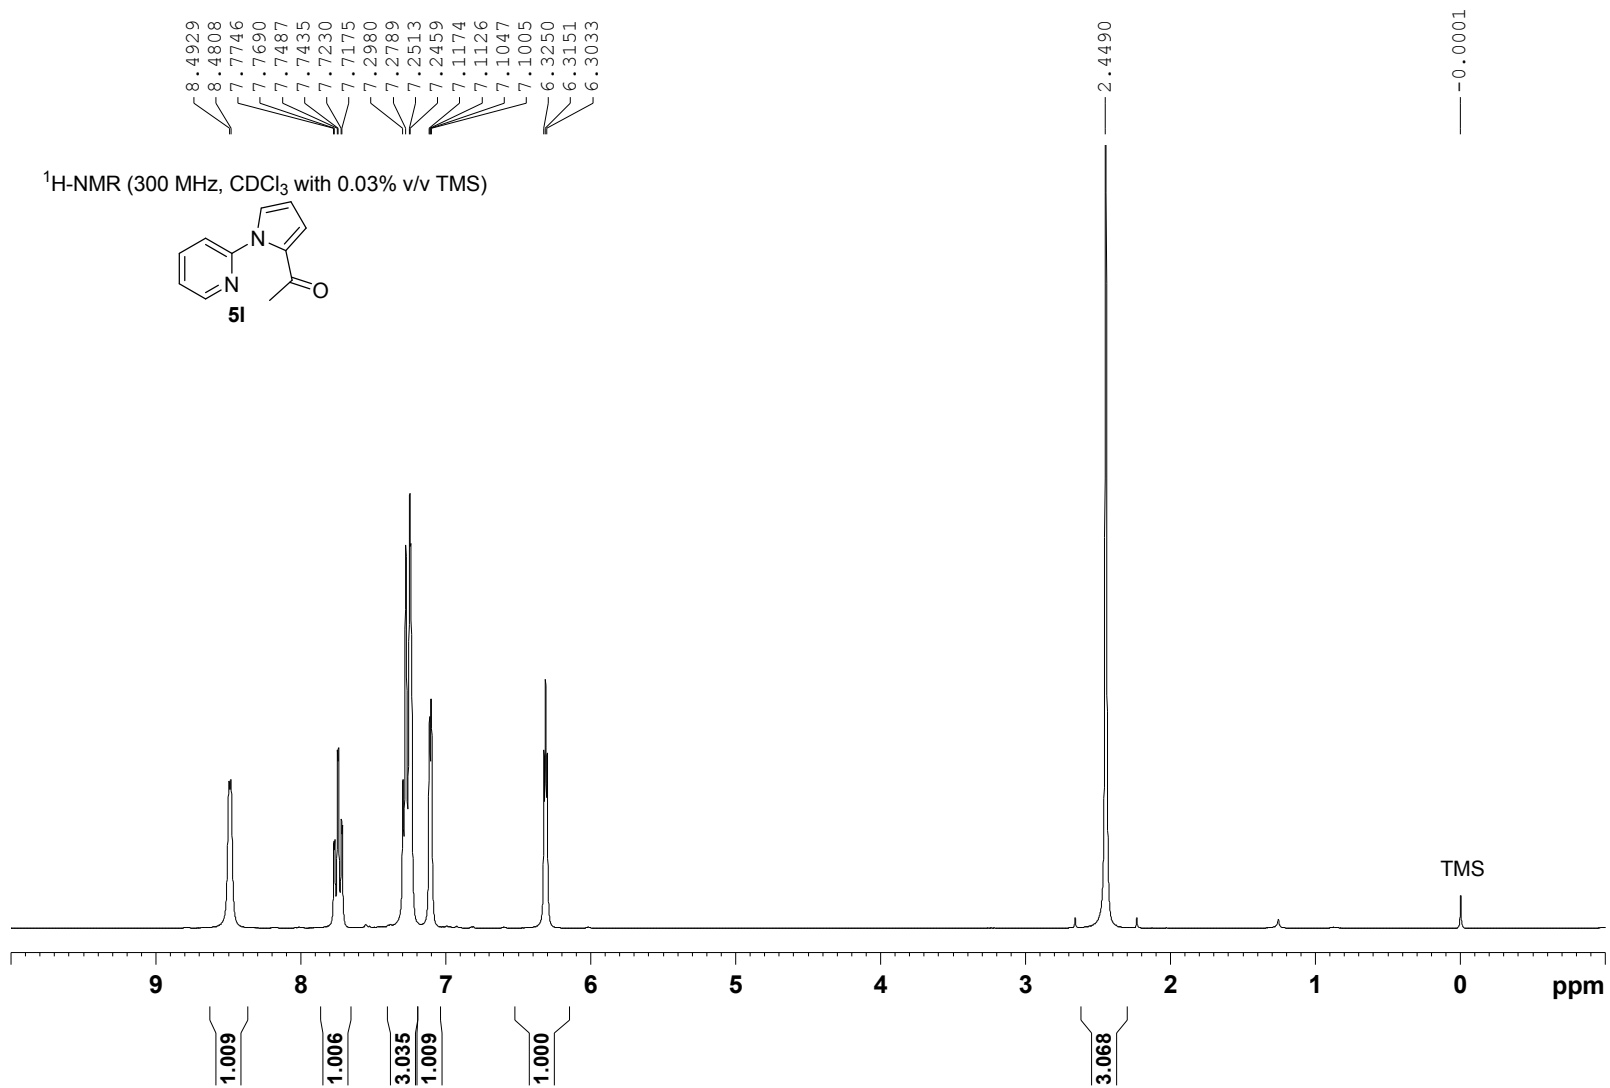

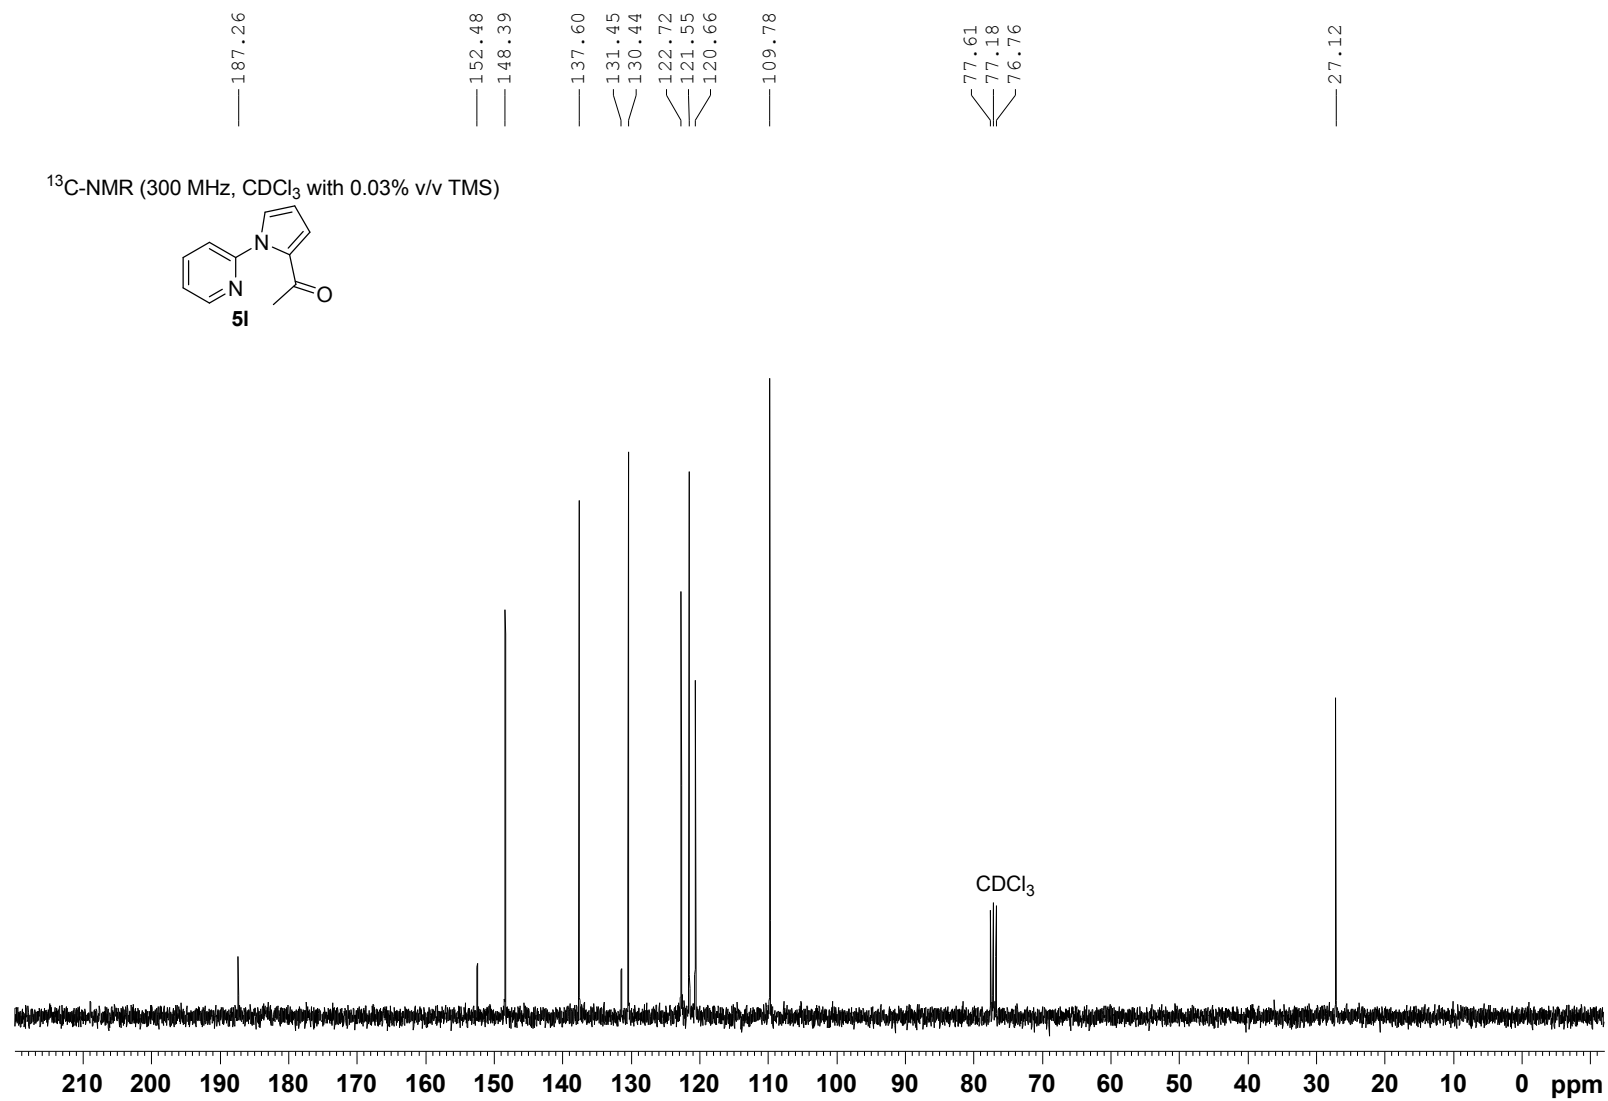

<sup>1</sup>H-NMR (300 MHz, CDCl<sub>3</sub> with 0.03% v/v TMS)

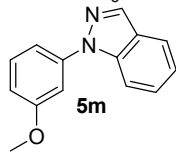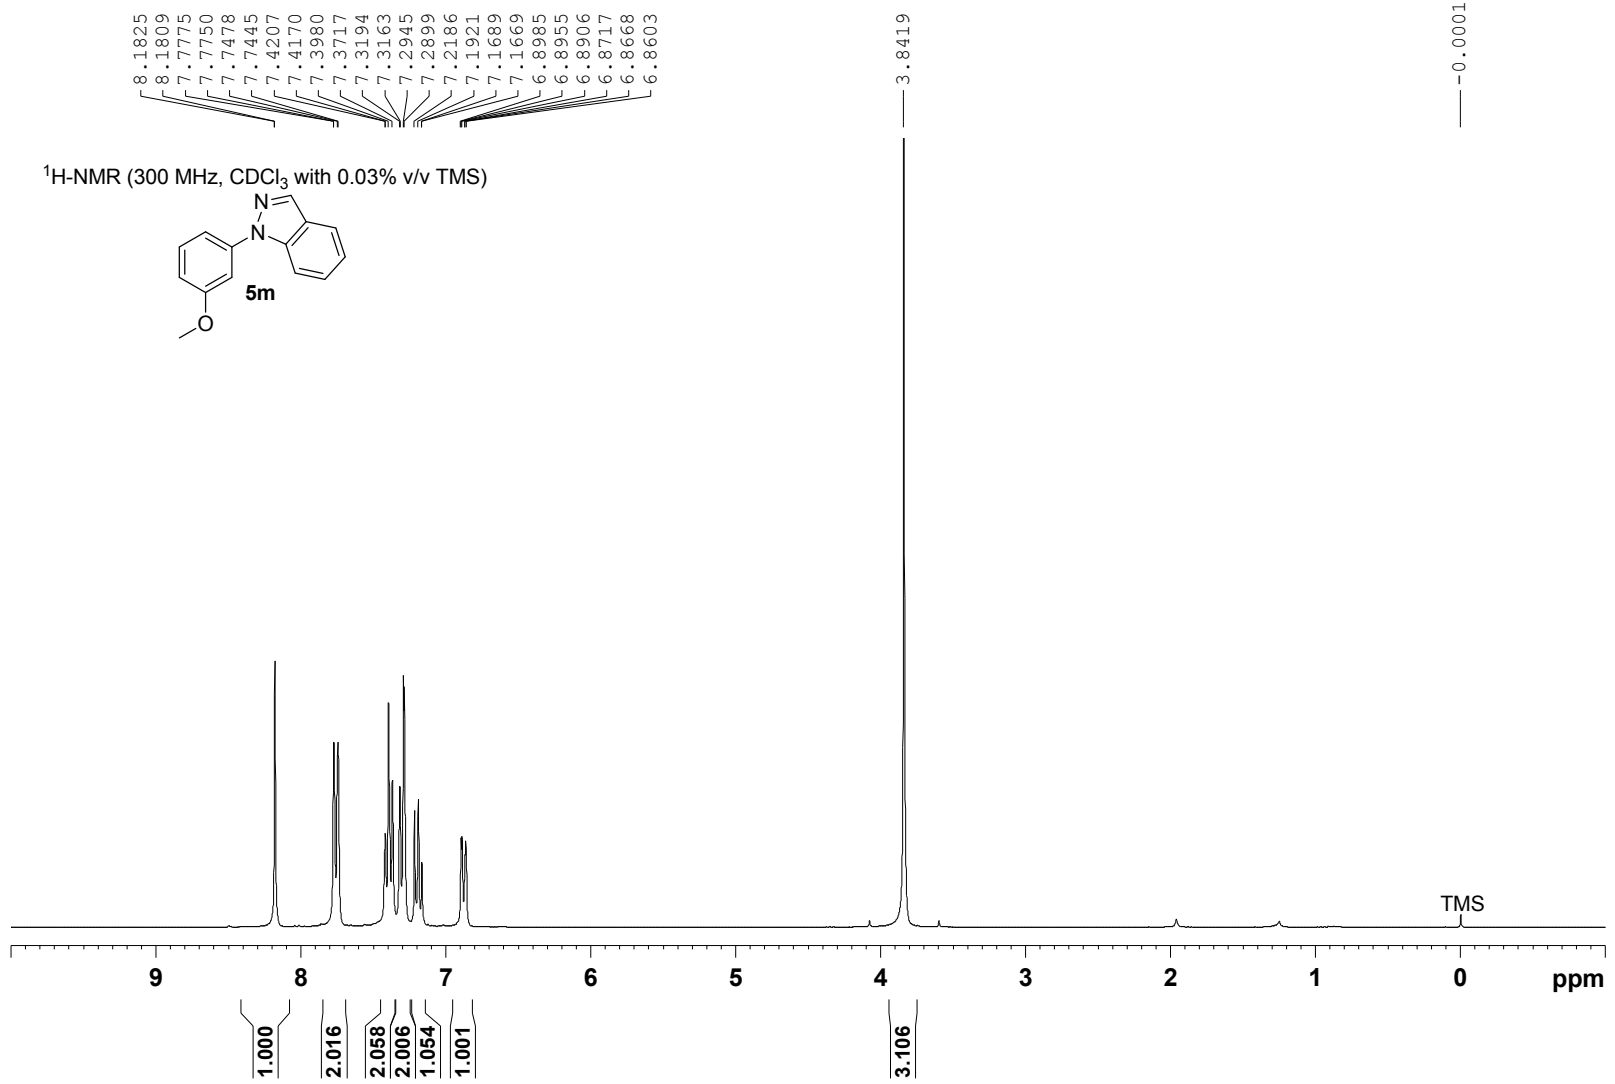

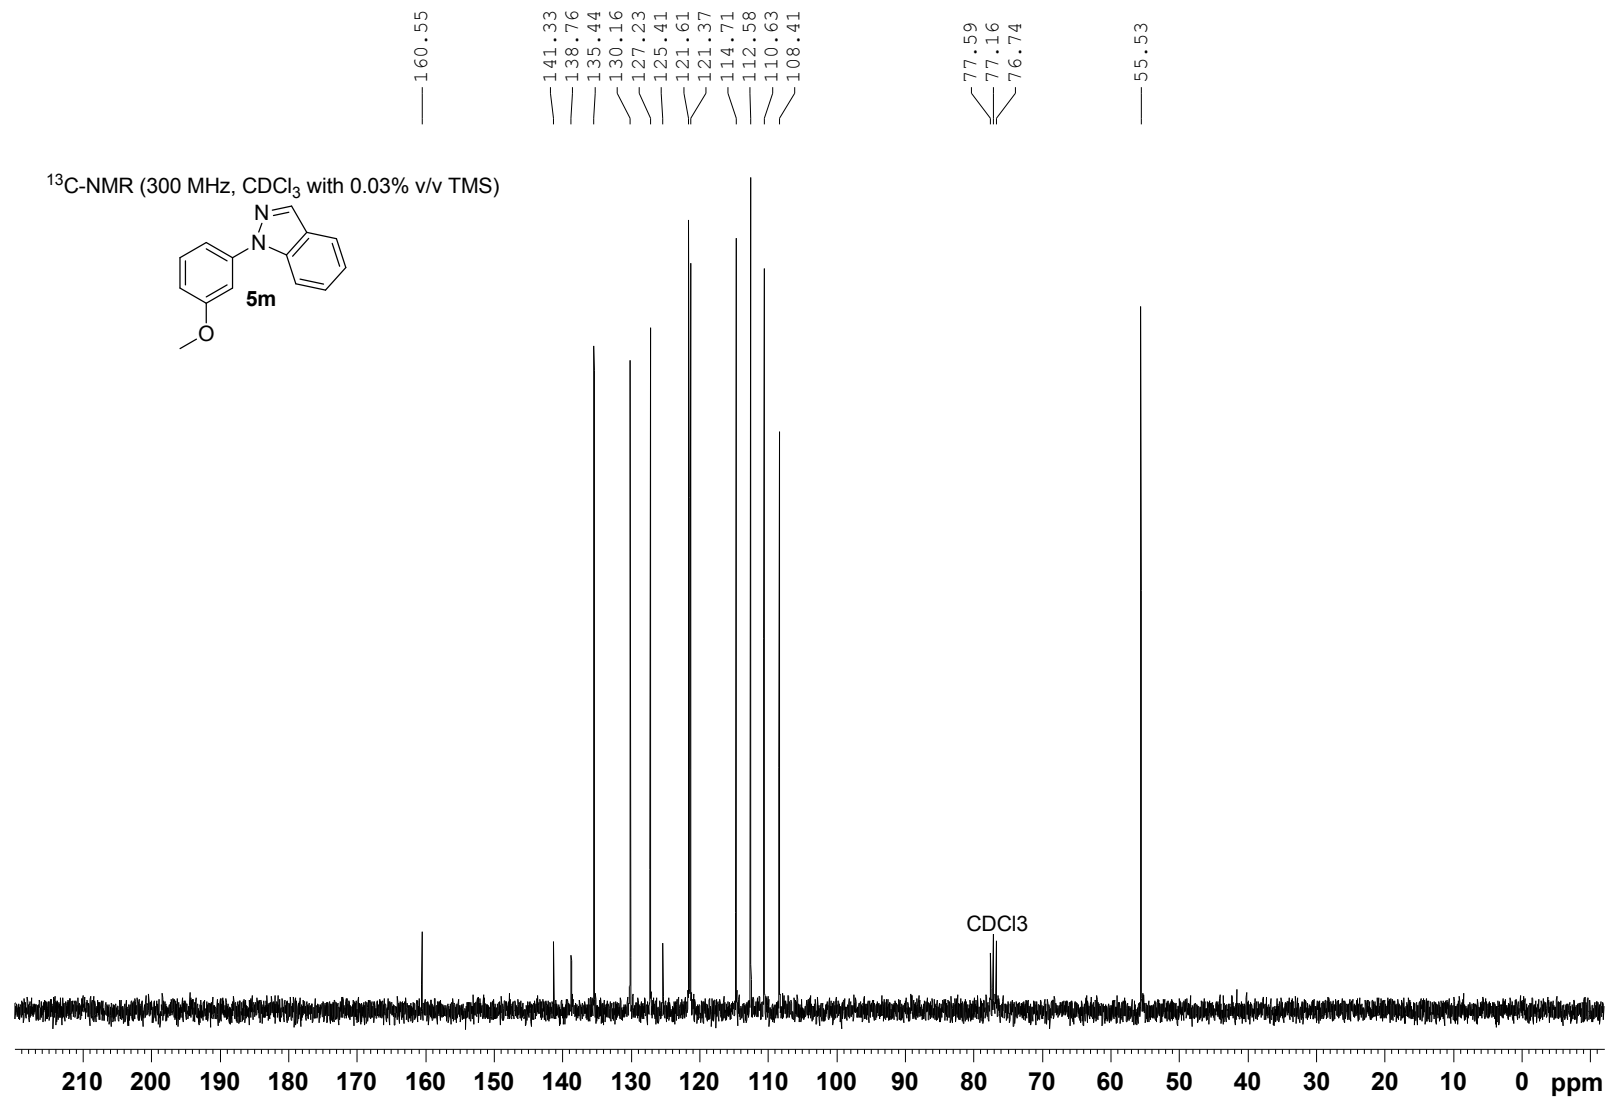

8.7780  
8.7712  
8.6102  
8.5975  
7.7771  
7.7504  
7.5975  
7.5794  
7.5689  
7.5508  
7.4522  
7.4363  
7.4255  
7.4095  
7.2710  
7.2602  
7.1830  
7.1543  
7.1503  
6.9759  
6.9691  
6.9453  
6.9398  
6.9158  
6.9091  
6.6877  
6.6777

0.0000

<sup>1</sup>H-NMR (300 MHz, CDCl<sub>3</sub> with 0.03% v/v TMS)

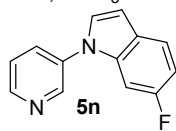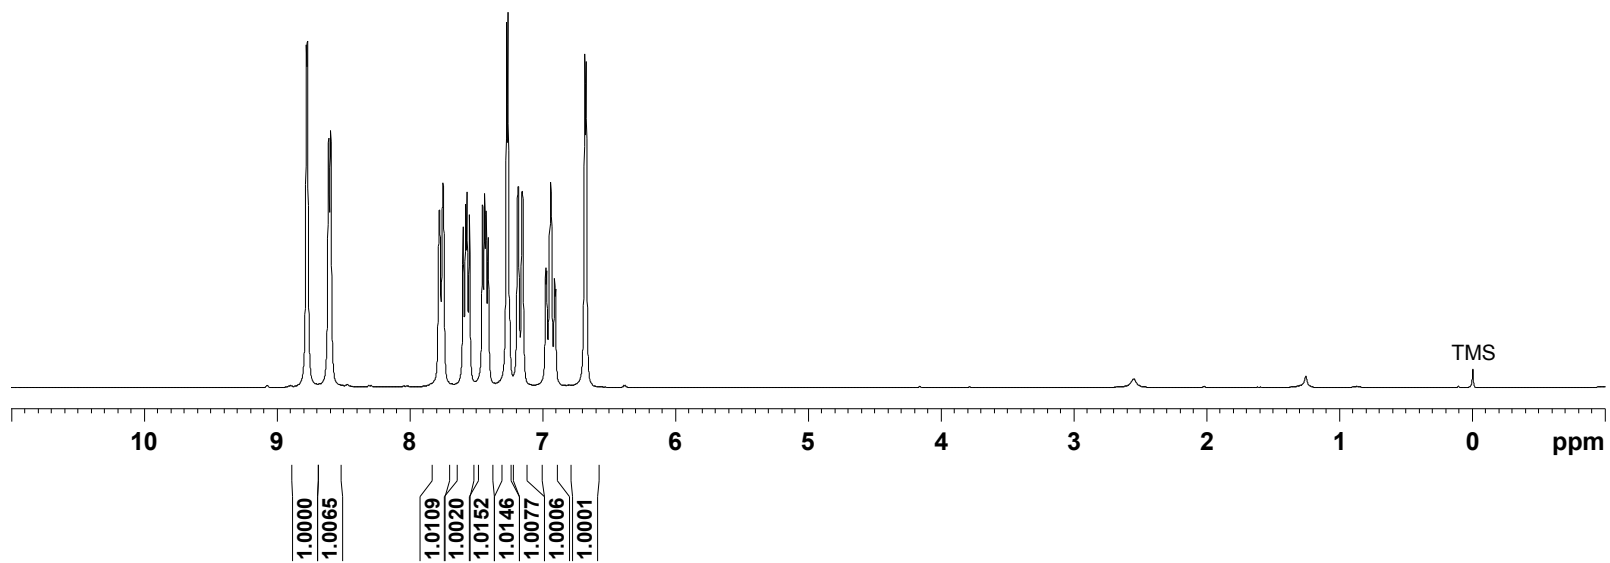



<sup>13</sup>C-NMR (300 MHz, CDCl<sub>3</sub> with 0.03% v/v TMS)

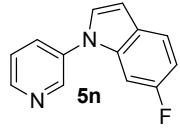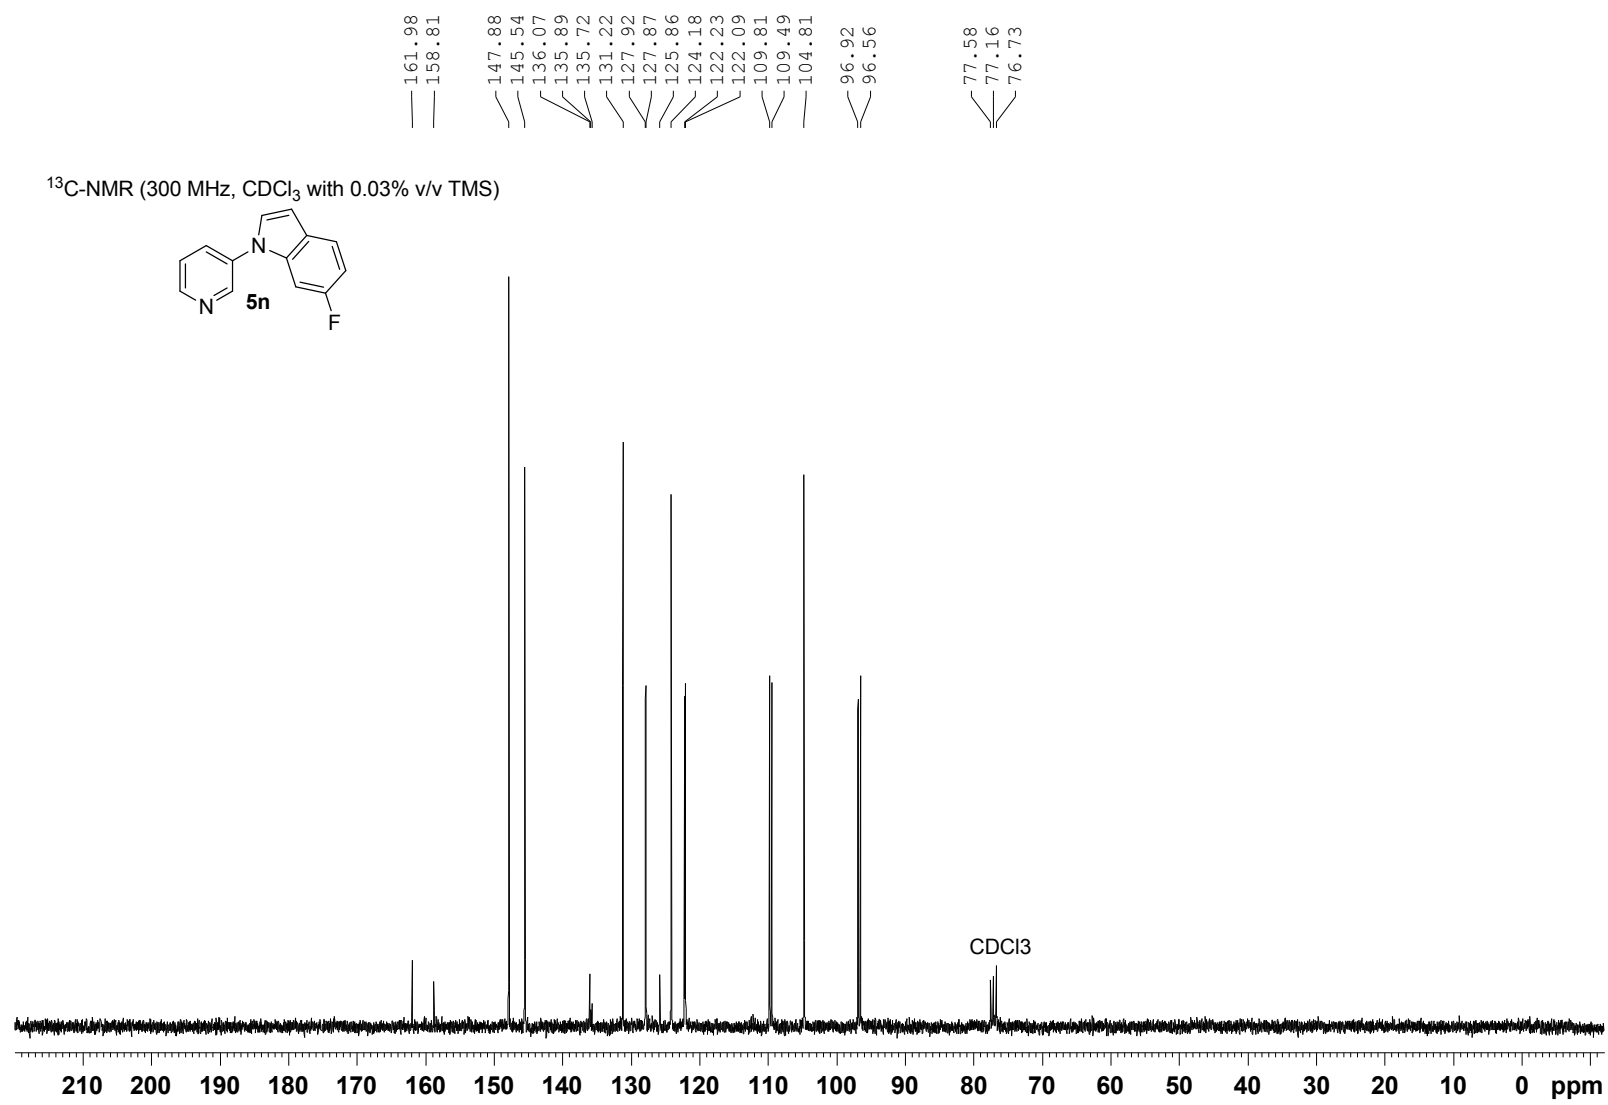

<sup>1</sup>H-NMR (300 MHz, DMSO-d<sub>6</sub> with 0.03% v/v TMS)

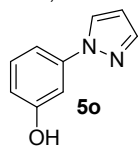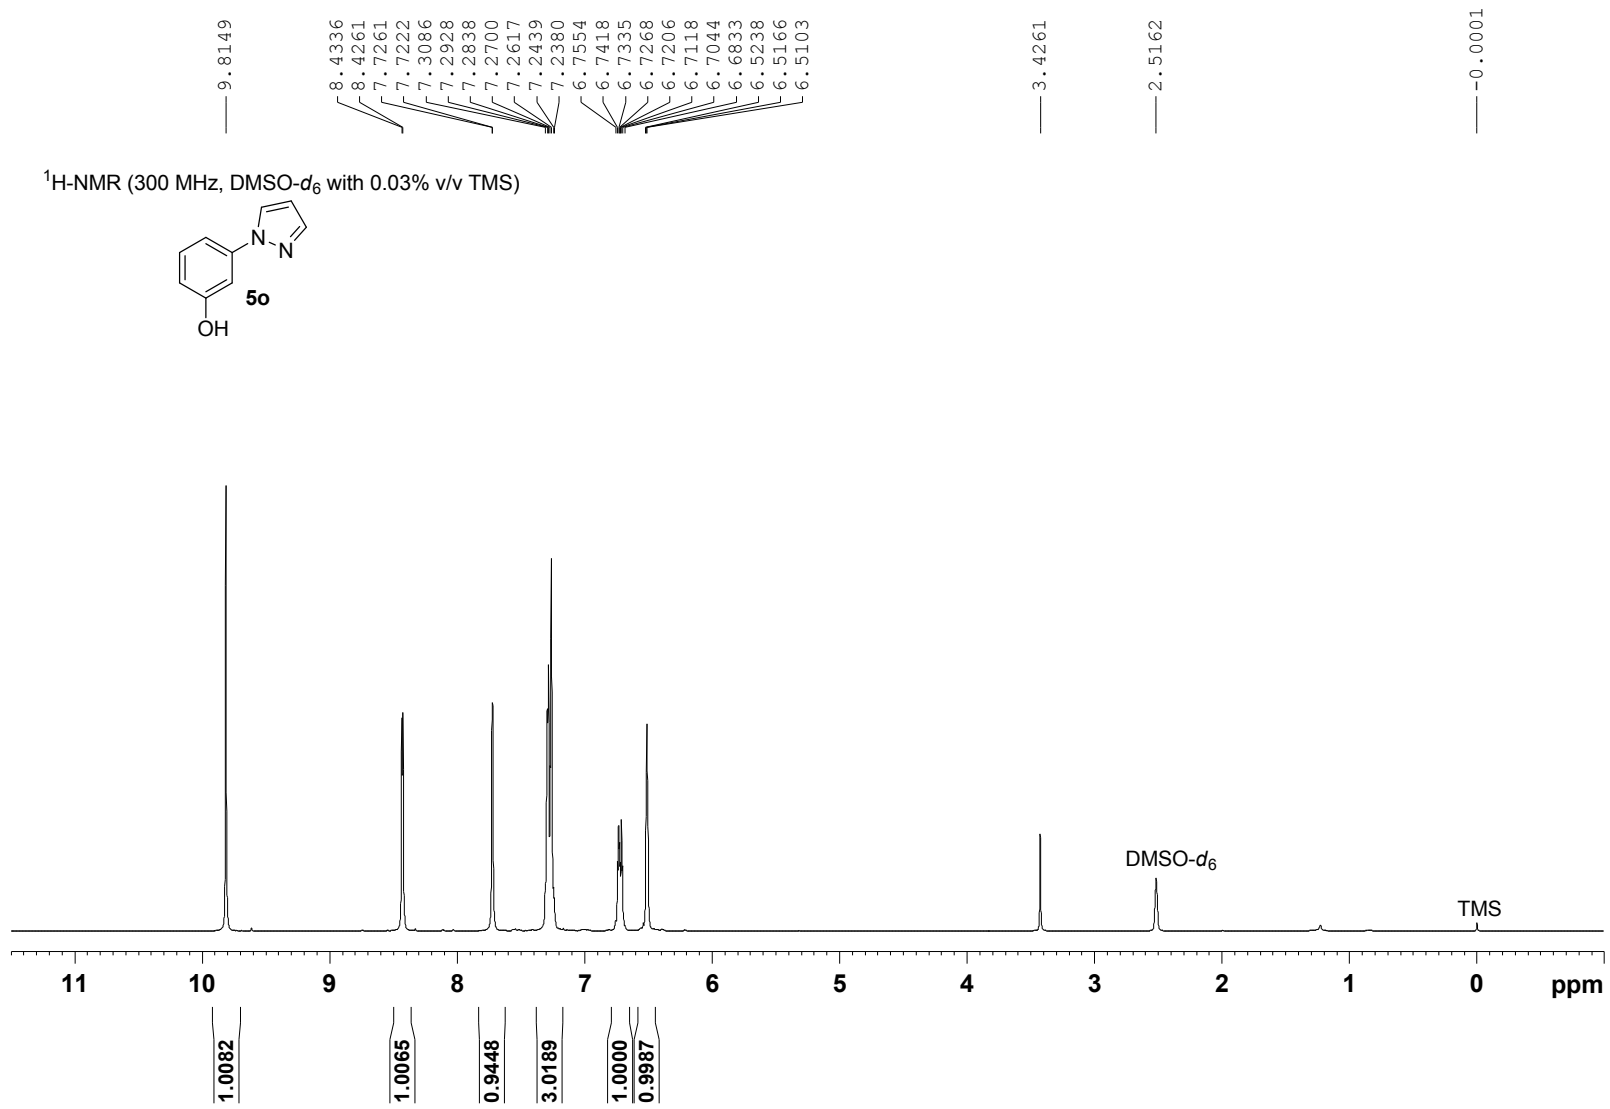

<sup>13</sup>C-NMR (300 MHz, DMSO-*d*<sub>6</sub> with 0.03% v/v TMS)

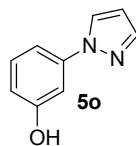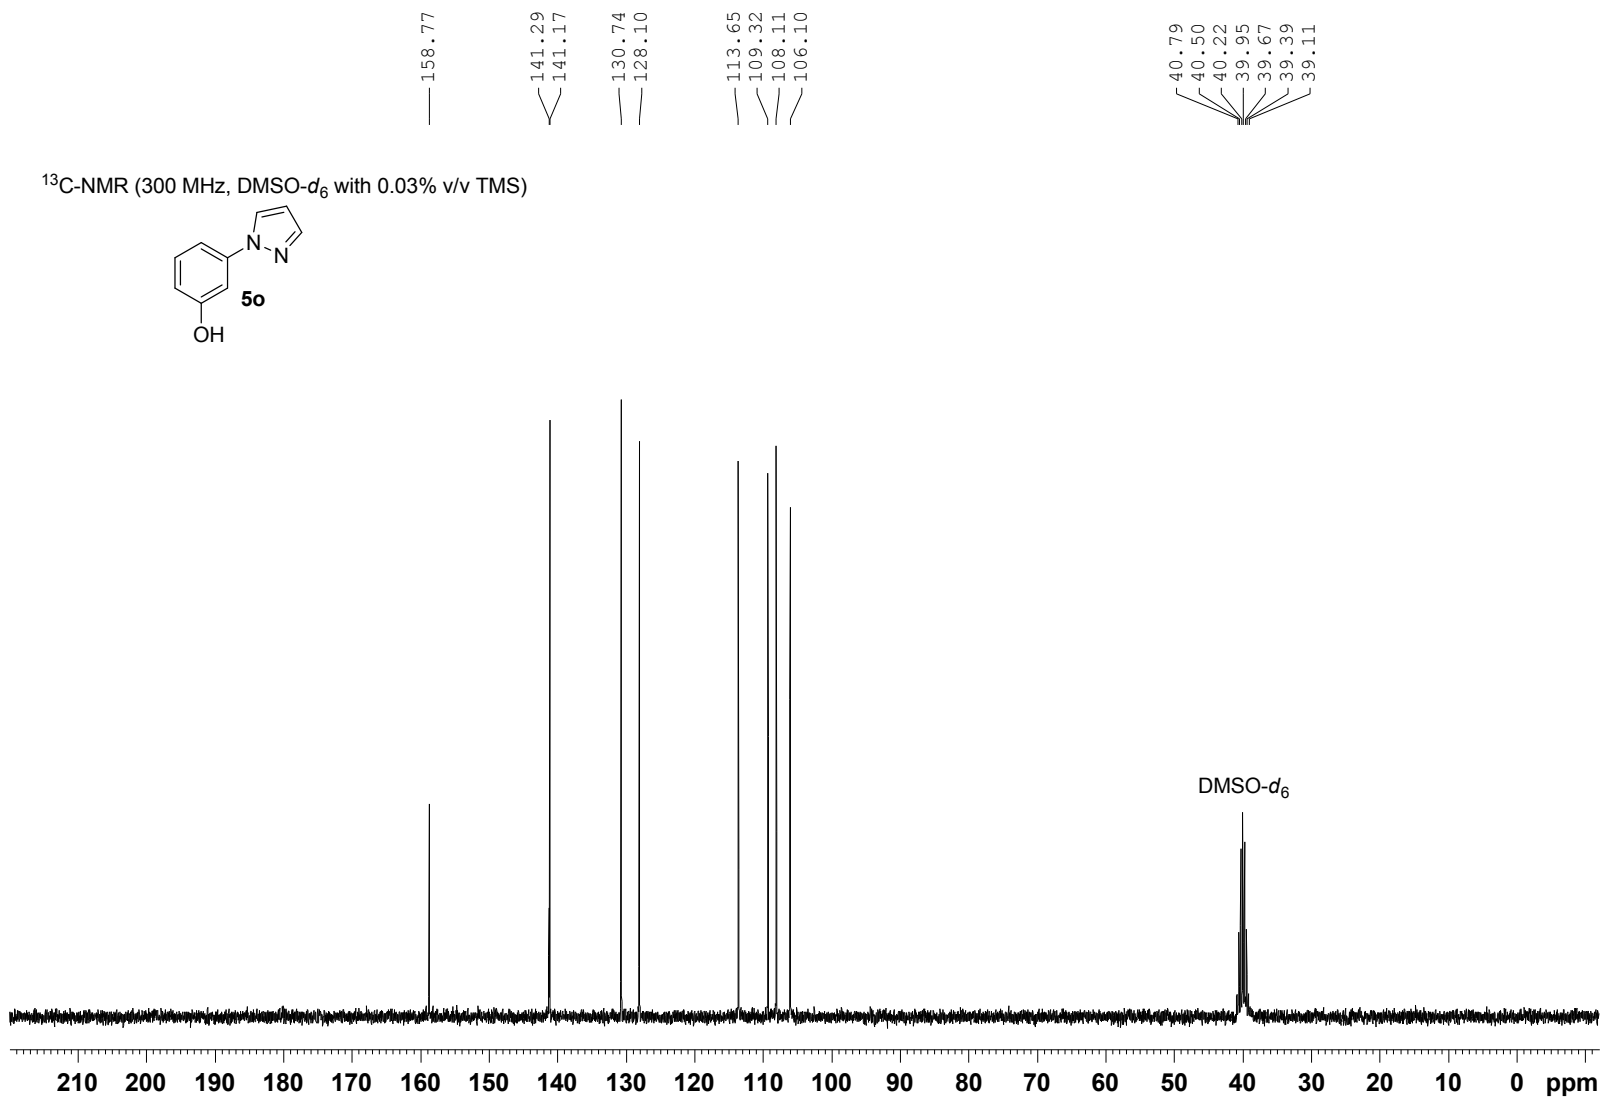

8.9952  
8.9888  
8.5486  
8.5342  
8.0808  
8.0762  
8.0739  
8.0691  
8.0533  
8.0486  
8.0464  
7.9766  
7.9685  
7.7764  
7.7730  
7.4273  
7.4114  
7.3997  
7.3839  
7.2862  
6.5275  
6.5209  
6.5144

— 0.0001

<sup>1</sup>H-NMR (300 MHz, CDCl<sub>3</sub> with 0.03% v/v TMS)

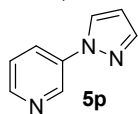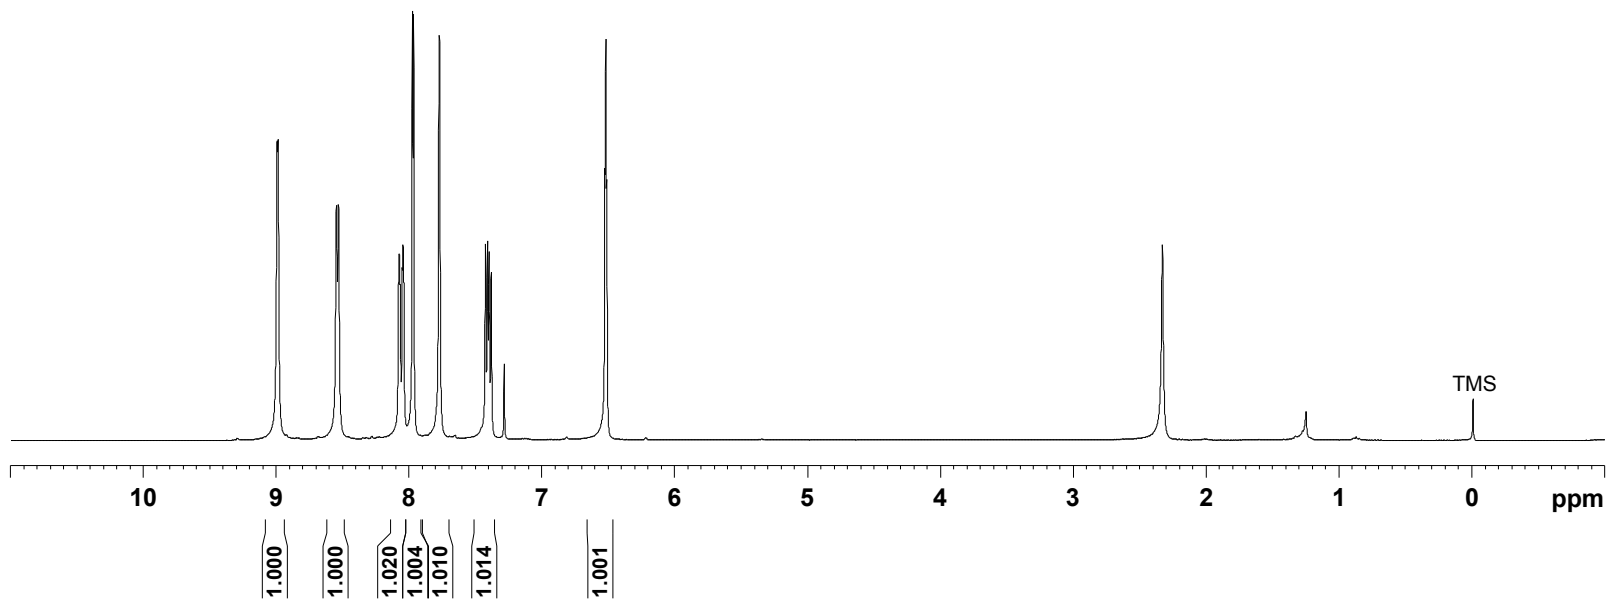

<sup>13</sup>C-NMR (300 MHz, CDCl<sub>3</sub> with 0.03% v/v TMS)

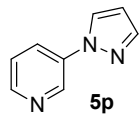

147.46  
141.93  
140.46  
136.53  
126.81  
126.47  
123.94  
108.41  
77.57  
77.15  
76.72

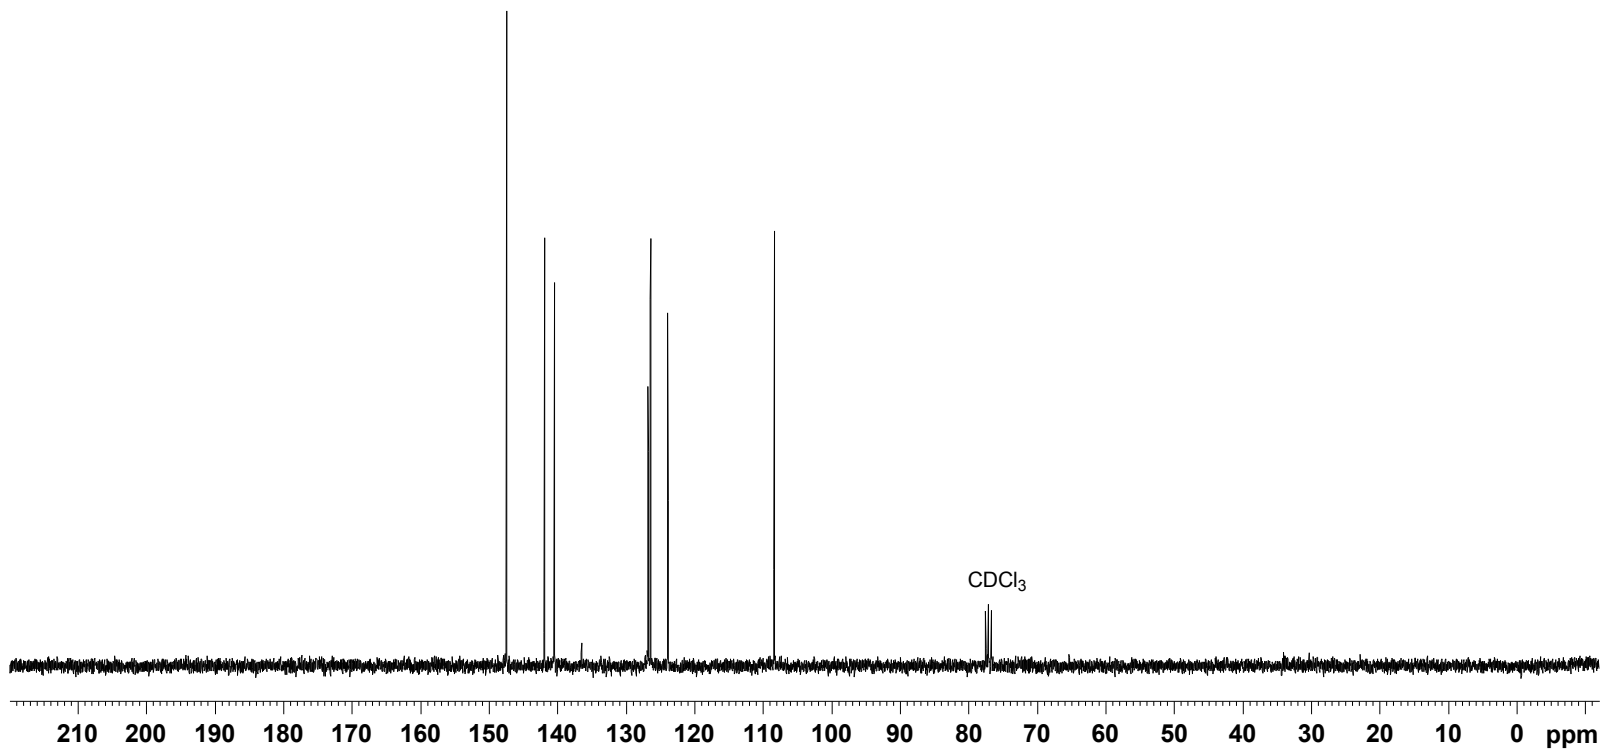

<sup>1</sup>H-NMR (300 MHz, CDCl<sub>3</sub> with 0.03% v/v TMS)

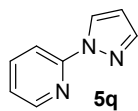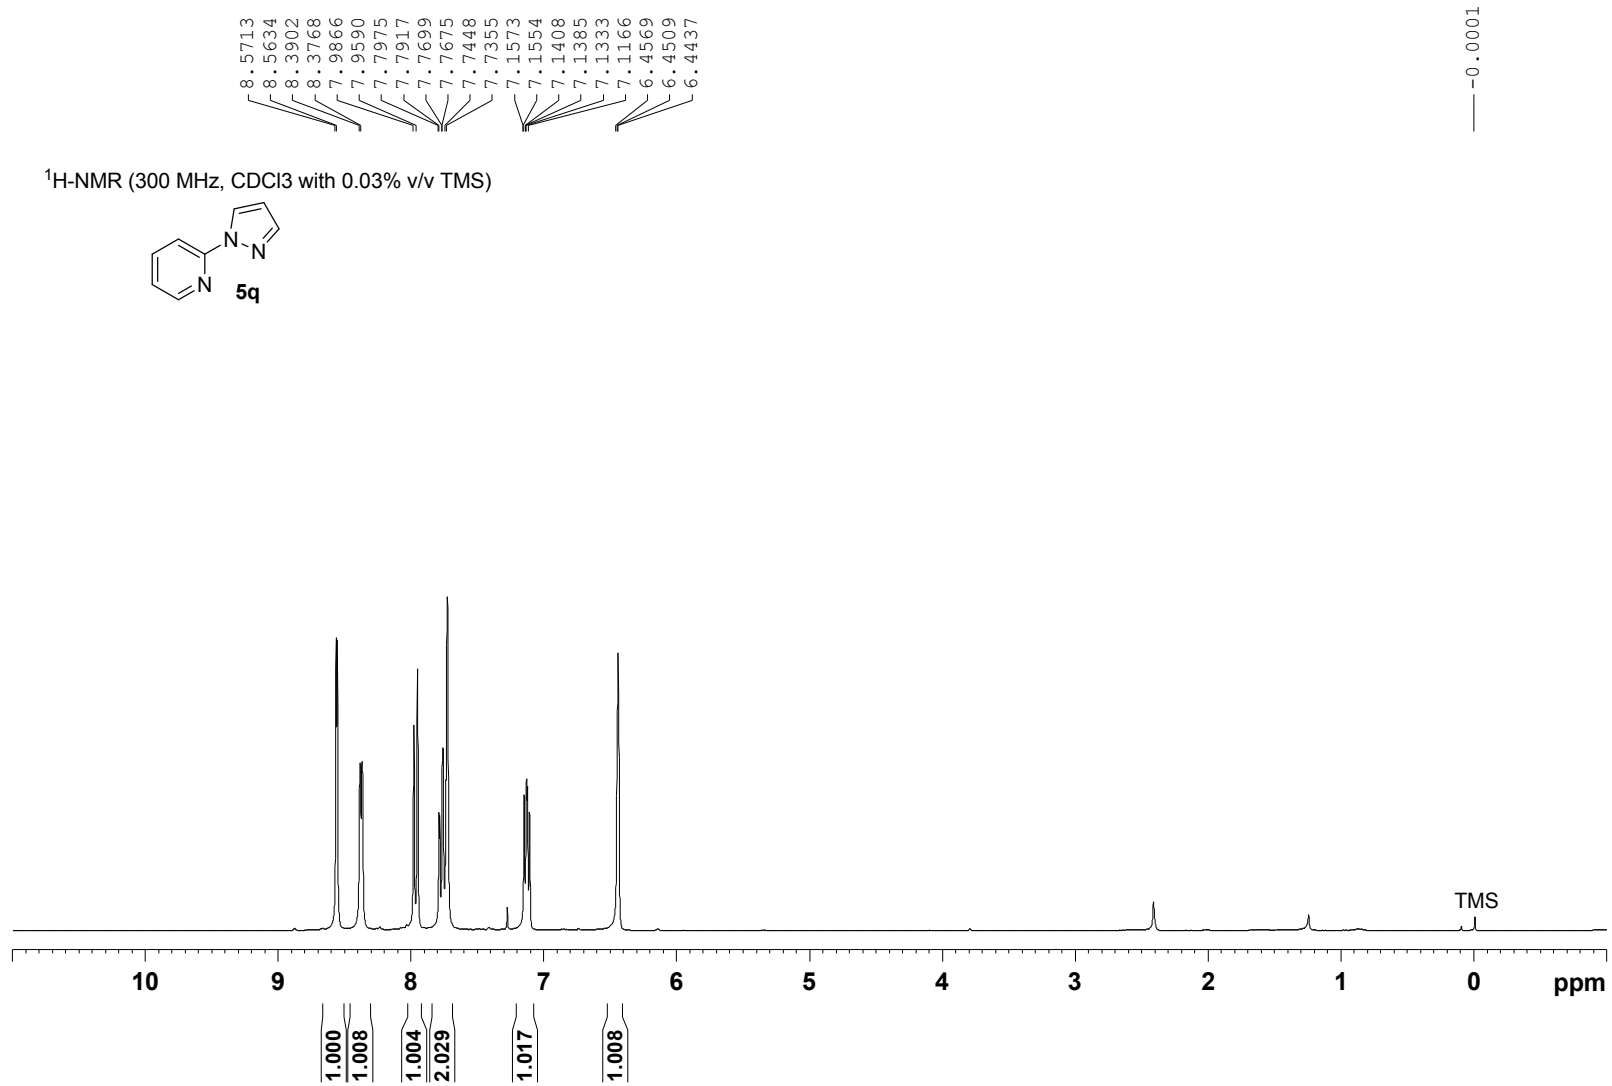

<sup>13</sup>C-NMR (300 MHz, CDCl<sub>3</sub> with 0.03% v/v TMS)

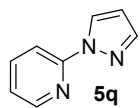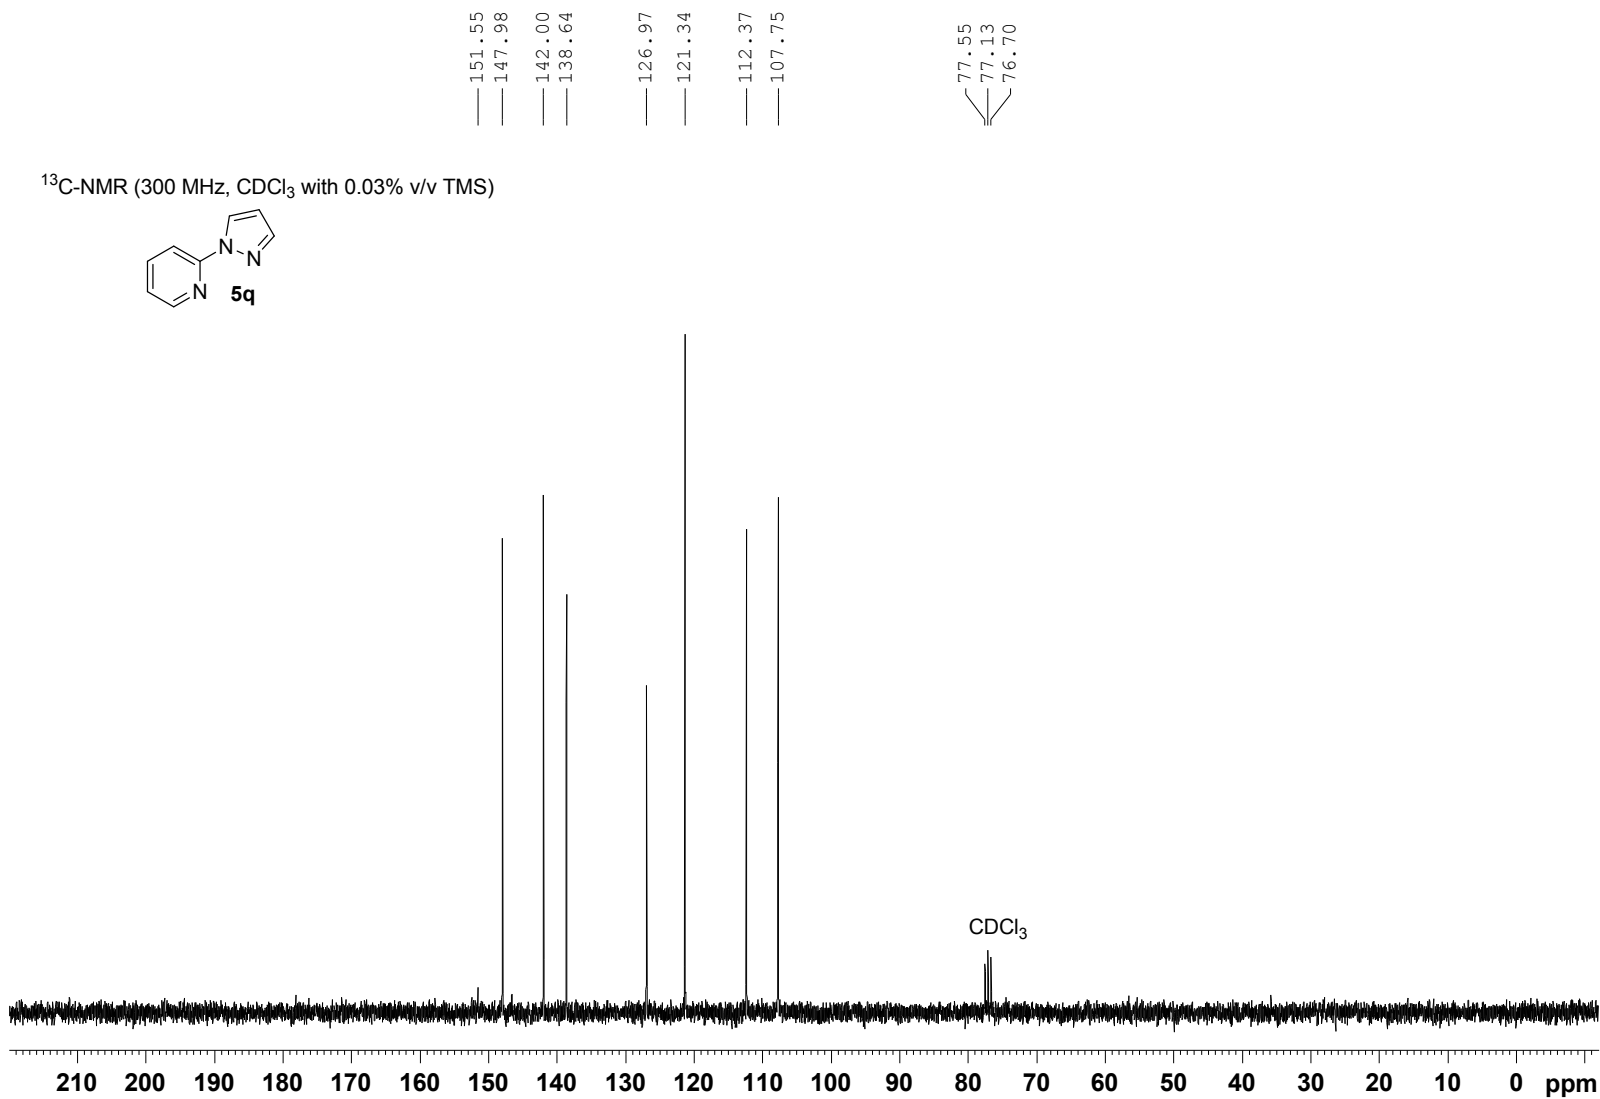

Supplement: c5ob00045a1.pdf [file c5ob00045a1.pdf]
